# Supplementary material
Source: Research Square preprint supplement (doi:10.21203/rs.3.rs-8972545/v1)
Supplement: Supplementary file 1 [file 977e4f86d25c2b8652eb7aa0.xlsx]

## Sheet: overview_download_express (1)
Table S1. Summary of identified metabolites methodology.
ID	Metabolite	代谢物	metab_id	level	Fragmentation Score	Theoretical Fragmentation Score	Class Ⅰ	物质一级分类	Class Ⅱ	物质二级分类	CCT	Plant compound	KEGG Pathway ID	KEGG Pathway Description	Library ID	Adducts	Formula	Retention time	通路	KEGG Compound ID	Mode	KEGG Compound First Category	KEGG Compound Second Category	KEGG Pathway First Category	KEGG Pathway Second Category	HMDB Superclass	HMDB Class	M/Z	RSD	Score	Mass Error	CAS ID	HMDB Subclass	MSQPa_1_1	MSQPa_1_2	MSQPa_1_3	MSQPa_2_1	MSQPa_2_2	MSQPa_2_3	MSQPa_3_1	MSQPa_3_2	MSQPa_3_3
pos_66	5-hydroxymethyl-2-furaldehyde	-	metab_65	B(i)	70.5	0	Others	其他类	Aldehydes and derivatives	醛类及其衍生物	C18	Others	-	-	HMDB0034355	M+H-H2O	C6H6O3	0.113867	-	C11101	pos	-	-	-	-	Organic oxygen compounds	Organooxygen compounds	109.02867521700001	0.00229348122856	53.3	2.13768339243175	67-47-0	Carbonyl compounds	4.61103	4.57707	4.60852	4.57113	4.52981	4.4963	4.56044	4.59729	4.632982843730001
pos_256	D-Pipecolic acid	D -哌啶酸	metab_249	B(i)	82.4	0	Amino acids and derivatives	氨基酸及其衍生物	Alpha amino acids and derivatives	Alpha氨基酸及其衍生物	C18	Primary metabolite	-	-	HMDB0005960	M+H	C6H11NO2	0.539217	-	-	pos	-	-	-	-	Organic acids and derivatives	Carboxylic acids and derivatives	130.086	0.0010258177859099999	56.2	0.20746591868189004	1723-00-8	Amino acids, peptides, and analogues	5.52096	5.4901797610399985	5.492323805569999	5.4313652159300005	5.4292	5.43573	5.6205	5.60649	5.62704
pos_352	1-aminocyclopropane-1-carboxylate	1-氨基环丙烷-1-羧酸	metab_343	B(i)	37.9	0	Amino acids and derivatives	氨基酸及其衍生物	Alpha amino acids and derivatives	Alpha氨基酸及其衍生物	C18	Primary metabolite	map01100;map00270;map01110	Metabolic pathways;Cysteine and methionine metabolism;Biosynthesis of secondary metabolites	HMDB0036458	M+H	C4H7NO2	0.599467	代谢途径;半胱氨酸和蛋氨酸代谢;次级代谢产物的生物合成	C01234	pos	-	-	Metabolism;Metabolism;Metabolism	Global and overview maps;Amino acid metabolism;Global and overview maps	Organic acids and derivatives	Carboxylic acids and derivatives	102.055	0.0030732304849399998	46.4	3.83280603851854	22059-21-8	Amino acids, peptides, and analogues	4.77081	4.76688	4.74944	4.56913	4.56708	4.56536	4.68606	4.6843	4.67851
pos_353	Choline	胆碱	metab_344	B(i)	92	0	Others	其他类	Others	其他类	C18	Others	map01100;map00564;map02010;map00260	Metabolic pathways;Glycerophospholipid metabolism;ABC transporters;Glycine, serine and threonine metabolism	HMDB0000097;PW_C000065	M+	C5H14NO+	0.599467	代谢途径;甘油磷脂代谢;ABC转运器;甘氨酸、丝氨酸和苏氨酸代谢	C00114	pos	-	-	Metabolism;Metabolism;Environmental Information Processing;Metabolism	Global and overview maps;Lipid metabolism;Membrane transport;Amino acid metabolism	Organic nitrogen compounds	Organonitrogen compounds	104.107	0.0016454514357000002	56.7	-2.58066	62-49-7	Quaternary ammonium salts	6.60735	6.58349	6.587113174550001	6.541994434959999	6.51676	6.56041	6.576554646440001	6.555501894550001	6.5344425072300005
pos_364	3-(1-pyrazolyl)-alanine	3-（1-吡唑基）-丙氨酸	metab_354	B(i)	42.9	0	Amino acids and derivatives	氨基酸及其衍生物	Alpha amino acids and derivatives	Alpha氨基酸及其衍生物	C18	Primary metabolite	-	-	-	M+H	C6H9N3O2	0.599467	-	-	pos	-	-	-	-	-	-	156.077	0.00344545053963	47.8	-0.0517796	-	-	4.97658	4.9732520434300005	4.97117	4.97176	4.98498	4.995	4.93173	4.9345158518800005	4.93504
pos_366	L-(+)-Arginine	L-精氨酸	metab_356	B(i)	85.3	0	Amino acids and derivatives	氨基酸及其衍生物	Alpha amino acids and derivatives	Alpha氨基酸及其衍生物	C18	Primary metabolite	map01100;map00220;map01110;map02010;map00330;map01230;map00470;map00970;map00261	Metabolic pathways;Arginine biosynthesis;Biosynthesis of secondary metabolites;ABC transporters;Arginine and proline metabolism;Biosynthesis of amino acids;D-Amino acid metabolism;Aminoacyl-tRNA biosynthesis;Monobactam biosynthesis	HMDB0000517	M+H	C6H14N4O2	0.599467	代谢途径;精氨酸生物合成;次级代谢产物的生物合成;ABC转运器;精氨酸和脯氨酸代谢;氨基酸生物合成;D-氨基酸代谢;氨酰基tRNA生物合成;单环菌素生物合成	C00062	pos	Peptides	Amino acids	Metabolism;Metabolism;Metabolism;Environmental Information Processing;Metabolism;Metabolism;Metabolism;Genetic Information Processing;Metabolism	Global and overview maps;Amino acid metabolism;Global and overview maps;Membrane transport;Amino acid metabolism;Global and overview maps;Metabolism of other amino acids;Translation;Biosynthesis of other secondary metabolites	Organic acids and derivatives	Carboxylic acids and derivatives	175.119	0.0016815944375199998	55.5	-0.41153	74-79-3	Amino acids, peptides, and analogues	5.85473	5.844167618559999	5.8322891744000005	5.5241205002300005	5.52904	5.55057	5.9311799265100005	5.9282573664800005	5.930873493790001
pos_393	Phloroglucinol	间苯三酚	metab_382	B(i)	73.4	0	Phenolic acids and derivatives	酚酸类及其衍生物	Phloroglucinols and derivatives	间苯三酚及其衍生物	C18	Secondary metabolite	map01100	Metabolic pathways	HMDB0013675	M+H	C6H6O3	0.6180666666669999	代谢途径	C02183	pos	-	-	Metabolism	Global and overview maps	Benzenoids	Phenols	127.039	0.00180752689682	54.3	0.744383633628045	108-73-6	Benzenetriols and derivatives	6.0641	6.03645	6.03678	5.916544763969999	5.91352	5.88114	5.859247817280001	5.866963040469999	5.87971
pos_398	Trigonelline	葫芦巴碱	metab_387	B(i)	89.6	0	Alkaloids and derivatives	生物碱及其衍生物	Other alkaloids and derivatives	其他类生物碱及其衍生物	C18	Secondary metabolite	map00960	Tropane, piperidine and pyridine alkaloid biosynthesis	HMDB0000875	M+H	C7H7NO2	0.6180666666669999	莨菪烷、哌啶和吡啶生物碱的生物合成	C01004	pos	-	-	Metabolism	Biosynthesis of other secondary metabolites	Alkaloids and derivatives	Not Available	138.055	0.00268962447292	56.4	-0.041999	535-83-1	Not Available	4.75497	4.75155	4.74249	4.3722	4.37703	4.38878	4.818962774619999	4.81789	4.84187
pos_405	SDMA	-	metab_394	B(i)	47.6	0	Amino acids and derivatives	氨基酸及其衍生物	Arginine and derivatives	精氨酸及其衍生物	C18	Primary metabolite	-	-	HMDB0003334	M+H	C8H18N4O2	0.6180666666669999	-	-	pos	-	-	-	-	Organic acids and derivatives	Carboxylic acids and derivatives	203.15	0.00270725410319	47.8	-0.337192	30344-00-4	Amino acids, peptides, and analogues	5.03654	5.01633	5.016564744609999	4.8685535940300015	4.82853	4.86258	5.08857	5.059179568209999	5.10278
pos_416	(R,R,R)-nicotianamine	-	metab_405	B(i)	71.1	0	Amino acids and derivatives	氨基酸及其衍生物	Alpha amino acids and derivatives	Alpha氨基酸及其衍生物	C18	Primary metabolite	-	-	-	M+H	C12H21N3O6	0.6180666666669999	-	-	pos	-	-	-	-	-	-	304.15	0.0024594770866599998	52.7	-0.736557	-	-	5.10923	5.0626	5.042949675369999	5.10989	5.13888	5.15632	4.66289	4.64602	4.65995
pos_425	Furfural	糠醛	metab_414	B(i)	71.6	0	Others	其他类	Aldehydes and derivatives	醛类及其衍生物	C18	Others	map01100	Metabolic pathways	HMDB0032914	M+H	C5H4O2	0.63665	代谢途径	C14279	pos	-	-	Metabolism	Global and overview maps	Organic oxygen compounds	Organooxygen compounds	97.0288	0.0026934371823	53.1	4.19969976110973	1998-01-01	Carbonyl compounds	5.05825	5.04361	5.03525	4.92112	4.92556	4.90532	4.904852716740001	4.9099	4.903067065259999
pos_434	Levoglucosan	左旋葡聚糖	metab_423	B(i)	88.5	0	Others	其他类	Others	其他类	C18	Others	-	-	HMDB0000640	M+H	C6H10O5	0.63665	-	C22350	pos	-	-	-	-	Organoheterocyclic compounds	Oxepanes	163.05997072899999	0.00167182200322	57.1	-0.796786	498-07-7	Not Available	5.324190042240001	5.3088108400800005	5.292118542130001	5.22602	5.23812	5.22261	5.193811042869998	5.20682	5.217320040340001
pos_436	N2-acetyl-l-ornithine	-	metab_425	B(i)	49.5	0	Amino acids and derivatives	氨基酸及其衍生物	Alpha amino acids and derivatives	Alpha氨基酸及其衍生物	C18	Primary metabolite	map01100;map01210;map00220;map01110;map01230	Metabolic pathways;2-Oxocarboxylic acid metabolism;Arginine biosynthesis;Biosynthesis of secondary metabolites;Biosynthesis of amino acids	HMDB0003357	M+H	C7H14N2O3	0.63665	代谢途径;2-氧代羧酸代谢;精氨酸生物合成;次级代谢产物的生物合成;氨基酸生物合成	C00437	pos	-	-	Metabolism;Metabolism;Metabolism;Metabolism;Metabolism	Global and overview maps;Global and overview maps;Amino acid metabolism;Global and overview maps;Global and overview maps	Organic acids and derivatives	Carboxylic acids and derivatives	175.108	0.00305327319464	49.1	0.0993595128821399	6205-08-09	Amino acids, peptides, and analogues	5.02947	5.01081	5.03316	5.01954	5.03196	5.01477	4.661690564140001	4.69245	4.70232
pos_471	Lactulose	乳果糖	metab_458	B(i)	76.8	0	Carbohydrates and derivatives	碳水化合物及其衍生物	O-glycosyl compounds	O-糖基化合物	C18	Primary metabolite	-	-	HMDB0000740	M+NH4	C12H22O11	0.63665	-	C07064	pos	-	-	-	-	Organic oxygen compounds	Organooxygen compounds	360.14965827300006	0.00263853411013	54.5	-1.10716	4618-18-2	Carbohydrates and carbohydrate conjugates	5.57284	5.5289	5.52174	5.603974591290001	5.64464	5.62459	5.41376	5.37539	5.46319
pos_490	Pyrrolidine	吡咯烷	metab_476	B(ii)	0	54.8	Others	其他类	Pyrrolidines	吡咯烷类	C18	Others	-	-	HMDB0031641	M+H	C4H9N	0.656917	-	-	pos	-	-	-	-	Organoheterocyclic compounds	Pyrrolidines	72.0815	0.0031448024091999993	48.7	9.70517106821706	123-75-1	Not Available	5.00604	4.98355	4.967020736359999	4.732266714780001	4.72612	4.74161	4.95155	4.94025	4.96833
pos_534	2-Hydroxy-1,4-benzoquinone	-	metab_518	B(i)	60.5	0	Quinones	醌类	Benzoquinones	苯醌	C18	Secondary metabolite	map01100	Metabolic pathways	-	M+H	C6H4O3	0.693017	代谢途径	C07103	pos	-	-	Metabolism	Global and overview maps	-	-	125.023	0.0009002390549430001	51.7	0.830625003542106	2474-72-8	-	4.1591408453600005	4.1857608317300015	4.15591	4.17998	4.216219924330002	4.21982	4.2461	4.16068	4.17535
pos_551	4-Hydroxybenzaldehyde	4-羟基苯甲醛	metab_535	B(i)	90.5	0	Others	其他类	Aldehydes and derivatives	醛类及其衍生物	C18	Others	map01100	Metabolic pathways	HMDB0011718	M+H	C7H6O2	0.7124166666670001	代谢途径	C00633	pos	-	-	Metabolism	Global and overview maps	Organic oxygen compounds	Organooxygen compounds	123.044	0.00227676455182	57.5	1.22955253562237	123-08-0	Carbonyl compounds	3.96196	4.00231	3.98856	3.87197	3.90555	3.9108	4.0965	4.08469	4.042446137250002
pos_557	L-Tyrosine	L-酪氨酸	metab_541	B(i)	99.5	0	Amino acids and derivatives	氨基酸及其衍生物	Tyrosine and derivatives	酪氨酸及其衍生物	C18	Primary metabolite	map01100;map01110;map00350;map01240;map00730;map00130;map01210;map00965;map00999;map01230;map00966;map00950;map00460;map00940;map00360;map00970;map00261;map00400	Metabolic pathways;Biosynthesis of secondary metabolites;Tyrosine metabolism;Biosynthesis of cofactors;Thiamine metabolism;Ubiquinone and other terpenoid-quinone biosynthesis;2-Oxocarboxylic acid metabolism;Betalain biosynthesis;Biosynthesis of various plant secondary metabolites;Biosynthesis of amino acids;Glucosinolate biosynthesis;Isoquinoline alkaloid biosynthesis;Cyanoamino acid metabolism;P…	HMDB0000158;PW_C000103	M+H	C9H11NO3	0.7124166666670001	代谢途径;次级代谢产物的生物合成;酪氨酸代谢;辅助因子的生物合成;硫胺素代谢;泛醌和其他萜类醌生物合成;2-氧代羧酸代谢;Betalain生物合成;各种植物次生代谢产物的生物合成;氨基酸生物合成;硫代葡萄糖苷生物合成;异喹啉生物碱生物合成;氰基氨基酸代谢;苯丙烷生物合成;苯丙氨酸代谢;氨酰基tRNA生物合成;单环菌素生物合成;苯丙氨酸、酪氨酸和色氨酸生物合成	C00082	pos	Peptides	Amino acids	Metabolism;Metabolism;Metabolism;Metabolism;Metabolism;Metabolism;Metabolism;Metabolism;Metabolism;Metabolism;Metabolism;Metabolism;Metabolism;Metabolism;Metabolism;Genetic Information Processing;Metabolism;Metabolism	Global and overview maps;Global and overview maps;Amino acid metabolism;Global and overview maps;Metabolism of cofactors and vitamins;Metabolism of cofactors and vitamins;Global and overview maps;Biosynthesis of other secondary metabolites;Biosynthesis of other secondary metabolites;Global and overview maps;Biosynthesis of other secondary metabolites;Biosynthesis of other secondary metabolites;Me…	Organic acids and derivatives	Carboxylic acids and derivatives	182.081	0.0013125487904999998	59.7	-0.0923563	60-18-4	Amino acids, peptides, and analogues	4.907195665490001	4.940575881519999	4.90725	4.757240164690001	4.75434	4.81039	5.0218448259800015	4.98795	4.96221
pos_562	Isoguanosine	异鸟苷	metab_546	B(i)	59.7	0	Nucleotides and derivatives	核苷酸及其衍生物	Nucleotides and derivatives	核苷酸及其衍生物	C18	Primary metabolite	-	-	-	M+H	C10H13N5O5	0.7124166666670001	-	C08432	pos	-	-	-	-	-	-	284.098	0.0027047356923800003	50.3	-2.33715	1818-71-9	-	4.96844	5.01437	4.94539	4.94469	4.96343	5.04026	5.588421525319999	5.554154683969999	5.59732
pos_568	2-Methyl-4-oxopentanedioic acid	2 -甲基- 4 -氧代戊二酸	metab_552	B(ii)	0	40.1	Organic acids and derivatives	有机酸及其衍生物	Organic acids and derivatives	有机酸及其衍生物	C18	Secondary metabolite	-	-	HMDB0039447	M+H	C6H8O5	0.732283	-	-	pos	-	-	-	-	Organic acids and derivatives	Keto acids and derivatives	161.044	0.00238324637845	47.5	-0.484046	55601-64-4	Gamma-keto acids and derivatives	5.24098	5.20905	5.19823	5.45664	5.46321	5.43751	5.32232	5.314168888809999	5.3473376553900005
pos_614	Isonicotinamide	异烟酰胺	metab_596	B(i)	37.6	0	Others	其他类	Pyridines and derivatives	吡啶及其衍生物	C18	Others	-	-	HMDB0253663	M+H	C6H6N2O	0.836117	-	C02421	pos	-	-	-	-	Organoheterocyclic compounds	Pyridines and derivatives	123.055	0.0082602982127	45.9	1.06918000460771	1453-82-3	Pyridinecarboxylic acids and derivatives	5.06788	4.970047715340001	5.00168	4.88782	4.87683	4.73092	4.93578	4.979371421540001	5.0675312984900005
pos_642	Hypoxanthine	次黄嘌呤	metab_624	B(i)	77.6	0	Others	其他类	Others	其他类	C18	Others	map01100;map01232;map00230	Metabolic pathways;Nucleotide metabolism;Purine metabolism	HMDB0000157;PW_C000102	M+H	C5H4N4O	0.877583	代谢途径;核苷酸代谢;嘌呤代谢	C00262	pos	-	-	Metabolism;Metabolism;Metabolism	Global and overview maps;Global and overview maps;Nucleotide metabolism	Organoheterocyclic compounds	Imidazopyrimidines	137.046	0.00504755572313	54.2	0.392321675714335	68-94-0	Purines and purine derivatives	4.67346	4.63399	4.59875	1.81483	2.23303	2.57503	2.20659	2.42198	1.94527
pos_645	Arecoline	槟榔碱	metab_627	B(i)	39.8	0	Alkaloids and derivatives	生物碱及其衍生物	Other alkaloids and derivatives	其他类生物碱及其衍生物	C18	Secondary metabolite	-	-	HMDB0030353	M+H	C8H13NO2	0.877583	-	C10129	pos	-	-	-	-	Alkaloids and derivatives	Not Available	156.10190336899998	0.00417185544291	46.2	-0.0111179	63-75-2	Not Available	5.31826	5.26563	5.28463	5.45139	5.441872772259999	5.3723650247800006	5.08514	5.061656618580001	5.14327
pos_655	Homostachydrine	-	metab_637	B(i)	95.7	0	Amino acids and derivatives	氨基酸及其衍生物	Alpha amino acids and derivatives	Alpha氨基酸及其衍生物	C18	Primary metabolite	-	-	HMDB0033433;HMDB0304552;HMDB0033433	2M+H	C8H15NO2	0.877583	-	C08283	pos	-	-	-	-	Organic acids and derivatives	Carboxylic acids and derivatives	315.22751724299997	0.0112614085283	57.6	-1.0077	1195-94-4;472-22-0	Amino acids, peptides, and analogues	3.25802	3.0936049961000003	3.01405	2.6220896823700004	2.86464	2.6166366879700003	2.61511	2.6189632510900003	2.6124
pos_660	Methyl isobutyl ketone	甲基异丁基甲酮	metab_642	B(i)	36.8	0	Others	其他类	Ketones and derivatives	酮类及其衍生物	C18	Others	-	-	HMDB0002939	M+H	C6H12O	0.8981166666670001	-	C19263	pos	-	-	-	-	Organic oxygen compounds	Organooxygen compounds	101.096	0.00213475488943	45.8	3.7117444761025093	108-10-1	Carbonyl compounds	4.4137474054500005	4.387351494690002	4.3803	4.417146128590001	4.43193	4.37188	4.37624	4.4132223765199985	4.443963120659999
pos_666	Cys-Gly	-	metab_648	B(i)	90.2	0	Amino acids and derivatives	氨基酸及其衍生物	Dipeptides	二肽	C18	Primary metabolite	map01100;map00480	Metabolic pathways;Glutathione metabolism	HMDB0000078	M+H	C5H10N2O3S	0.8981166666670001	代谢途径;谷胱甘肽代谢	C01419	pos	-	-	Metabolism;Metabolism	Global and overview maps;Metabolism of other amino acids	Organic acids and derivatives	Carboxylic acids and derivatives	179.04839187299999	0.00235199043939	56.8	-0.549018	19246-18-5	Amino acids, peptides, and analogues	4.5965454884699986	4.53872	4.5288	4.43575	4.4496	4.42098	4.42004	4.39291	4.41255
pos_667	3-Fumarylpyruvate	3 ~反丁烯二酸-单酰丙酮酸	metab_649	B(ii)	0	56.9	Organic acids and derivatives	有机酸及其衍生物	Organic acids and derivatives	有机酸及其衍生物	C18	Secondary metabolite	map01100;map00350	Metabolic pathways;Tyrosine metabolism	HMDB0060371	M+H	C7H6O6	0.8981166666670001	代谢途径;酪氨酸代谢	C02514	pos	-	-	Metabolism;Metabolism	Global and overview maps;Amino acid metabolism	Organic acids and derivatives	Keto acids and derivatives	187.024	0.0037479598167100003	50.8	-0.261009	-	Medium-chain keto acids and derivatives	4.50091	4.45829	4.40995	4.54243	4.56371	4.5064	4.28818	4.28716	4.31432
pos_668	Ecgonine Methyl Ester	芽子碱甲酯	metab_650	B(i)	47.1	0	Alkaloids and derivatives	生物碱及其衍生物	Tropane alkaloids	莨菪烷类生物碱	C18	Secondary metabolite	map01100;map00960;map01110	Metabolic pathways;Tropane, piperidine and pyridine alkaloid biosynthesis;Biosynthesis of secondary metabolites	HMDB0006406	M+H	C10H17NO3	0.8981166666670001	代谢途径;莨菪烷、哌啶和吡啶生物碱的生物合成;次级代谢产物的生物合成	C12448	pos	-	-	Metabolism;Metabolism;Metabolism	Global and overview maps;Biosynthesis of other secondary metabolites;Global and overview maps	Alkaloids and derivatives	Tropane alkaloids	200.128	0.00290081101515	48.3	-0.214059	7143/9/1;7143-09-1	Not Available	4.19835	4.184566727130001	4.18921	3.91219	3.954457788080001	3.89883	3.7332976215699993	3.63098	3.78472
pos_676	Pseudouridine 5'-phosphate	假尿苷5 ' -磷酸	metab_657	B(ii)	0	65.2	Carbohydrates and derivatives	碳水化合物及其衍生物	Other carbohydrates and derivatives	其他类碳水化合物及其衍生物	C18	Primary metabolite	map00240;map01100	Pyrimidine metabolism;Metabolic pathways	HMDB0001271	M+H-H2O	C9H13N2O9P	0.8981166666670001	嘧啶代谢;代谢途径	C01168	pos	-	-	Metabolism;Metabolism	Nucleotide metabolism;Global and overview maps	Organic oxygen compounds	Organooxygen compounds	307.032	0.00763021346824	51.9	-0.881341	1157-60-4	Carbohydrates and carbohydrate conjugates	4.89952	4.82334	4.77338	4.41511	4.52229	4.45193	4.69096	4.6297886016500005	4.75039
pos_685	Trans-aconitic acid	-	metab_665	B(i)	90.8	0	Organic acids and derivatives	有机酸及其衍生物	Organic acids and derivatives	有机酸及其衍生物	C18	Secondary metabolite	map01100;map00660	Metabolic pathways;C5-Branched dibasic acid metabolism	HMDB0000958	M+H-2H2O	C6H6O6	0.919767	代谢途径;C5-二元酸分支代谢	C02341	pos	Organic acids	Carboxylic acids	Metabolism;Metabolism	Global and overview maps;Carbohydrate metabolism	Organic acids and derivatives	Carboxylic acids and derivatives	139.003	0.0026313253516700003	57.7	0.295026107644582	4023-65-8	Tricarboxylic acids and derivatives	3.45903	3.4427700696900003	3.52599	3.74248	3.78331	3.81586	3.66164	3.64723	3.64211
pos_687	Cer(8:1_2O/2:0)	-	metab_667	B(i)	43.4	0	Others	其他类	Others	其他类	C18	Others	-	-	-	M+H	C10H19NO3	0.919767	-	-	pos	-	-	-	-	-	-	202.144	0.00329681035576	46.4	-0.353003	-	-	4.27297	4.23467	4.20035	4.164	4.1761	4.1654253695999985	4.03696	3.98485	4.08395
pos_689	Diketogulonic acid	二酮古洛糖酸	metab_669	B(ii)	0	61.9	Carbohydrates and derivatives	碳水化合物及其衍生物	Other carbohydrates and derivatives	其他类碳水化合物及其衍生物	C18	Primary metabolite	map01100;map00040;map00053	Metabolic pathways;Pentose and glucuronate interconversions;Ascorbate and aldarate metabolism	HMDB0005971	M+NH4	C6H8O7	0.919767	代谢途径;戊糖和葡萄糖醛酸相互转化;抗坏血酸和醛酸代谢	C04575	pos	-	-	Metabolism;Metabolism;Metabolism	Global and overview maps;Carbohydrate metabolism;Carbohydrate metabolism	Organic oxygen compounds	Organooxygen compounds	210.06070637099998	0.00229866839901	51.7	-0.634041	3409-57-2	Carbohydrates and carbohydrate conjugates	4.83232	4.71658	4.70027	4.6369	4.63852	4.5304352896300015	4.524962910259999	4.5339	4.64837
pos_706	N6-methyladenosine	-	metab_686	B(i)	76.9	0	Nucleotides and derivatives	核苷酸及其衍生物	Nucleotides and derivatives	核苷酸及其衍生物	C18	Primary metabolite	-	-	HMDB0004044	M+H	C11H15N5O4	0.94115	-	-	pos	-	-	-	-	Nucleosides, nucleotides, and analogues	Purine nucleosides	282.119	0.010579986526600001	54.8	-0.824524	1867-73-8	Not Available	4.77381	4.66187	4.60642	4.6578	4.717723450199999	4.63931	4.72137	4.647686426569999	4.70173
pos_715	Pyridoxine	吡哆醇	metab_695	B(i)	98	0	Vitamins	维生素类	Vitamins	维生素类	C18	Primary metabolite	map01100;map00750;map01240	Metabolic pathways;Vitamin B6 metabolism;Biosynthesis of cofactors	HMDB0000239;PW_C000161	M+H	C8H11NO3	0.96185	代谢途径;维生素B6代谢;辅助因子的生物合成	C00314	pos	Vitamins and cofactors	Vitamins	Metabolism;Metabolism;Metabolism	Global and overview maps;Metabolism of cofactors and vitamins;Global and overview maps	Organoheterocyclic compounds	Pyridines and derivatives	170.081	0.0078453287876	58.9	-0.641432	65-23-6	Pyridoxines	4.58915	4.547498730280001	4.54342	4.32016	4.32164	4.2964	4.432570027530001	4.41652	4.44942
pos_721	Adenosine 3'-monophosphate	3 ' -单磷酸腺苷	metab_700	B(i)	95.3	0	Nucleotides and derivatives	核苷酸及其衍生物	Nucleotides and derivatives	核苷酸及其衍生物	C18	Primary metabolite	map01100;map00230	Metabolic pathways;Purine metabolism	HMDB0003540	M+H-H2O	C10H14N5O7P	0.96185	代谢途径;嘌呤代谢	C01367	pos	-	-	Metabolism;Metabolism	Global and overview maps;Nucleotide metabolism	Nucleosides, nucleotides, and analogues	Ribonucleoside 3''-phosphates	330.059	0.00220184669556	58	-0.921615	84-21-9	Not Available	5.57666	5.537317100599999	5.523682569959999	5.188620821540001	5.22329	5.19596	5.390123353580001	5.355481827159999	5.39967
pos_722	Gibberellin A125	赤霉素A125	metab_701	B(ii)	0	41.8	Terpenoids	萜类	Diterpenoids	二萜	C18	Secondary metabolite	-	-	HMDB0036945	M+Na-H2O	C20H26O7	0.96185	-	-	pos	-	-	-	-	Lipids and lipid-like molecules	Prenol lipids	383.145	0.0038855454285300003	45.3	-6.30882	328058-47-5	Diterpenoids	2.30833	2.31278	2.32218	2.41688	2.40498	2.41144	2.40991	2.41376	2.58077
pos_726	Uracil	尿嘧啶	metab_705	B(i)	82.1	0	Others	其他类	Diazines	二氮杂苯	C18	Others	map00240;map01100;map00770;map01232;map00410	Pyrimidine metabolism;Metabolic pathways;Pantothenate and CoA biosynthesis;Nucleotide metabolism;beta-Alanine metabolism	HMDB0000300;PW_C000204	M+H	C4H4N2O2	0.982067	嘧啶代谢;代谢途径;泛酸和CoA生物合成;核苷酸代谢;β-丙氨酸代谢	C00106	pos	Nucleic acids	Bases	Metabolism;Metabolism;Metabolism;Metabolism;Metabolism	Nucleotide metabolism;Global and overview maps;Metabolism of cofactors and vitamins;Global and overview maps;Metabolism of other amino acids	Organoheterocyclic compounds	Diazines	113.035	0.00423650844631	55	1.9159517545777198	66-22-8	Pyrimidines and pyrimidine derivatives	5.1234	5.10635	5.09798	5.03183	5.0285727413800005	5.04537	5.0153736998400005	5.00857	5.00705
pos_737	Pro-Leu	-	metab_715	B(i)	87.4	0	Amino acids and derivatives	氨基酸及其衍生物	Dipeptides	二肽	C18	Primary metabolite	-	-	HMDB0253028	M+H	C11H20N2O3	0.982067	-	-	pos	-	-	-	-	Organic acids and derivatives	Carboxylic acids and derivatives	229.15447879200002	0.00214334730966	56.2	-0.83345	-	Amino acids, peptides, and analogues	4.26854	4.33054	4.314	4.36398	4.3158970080699985	4.40786	4.362758812819998	4.3445801066500005	4.3522668737800005
pos_740	Leu-Asn	-	metab_717	B(i)	77.9	0	Others	其他类	Others	其他类	C18	Others	-	-	HMDB0028924	M+H	C10H19N3O4	0.982067	-	-	pos	-	-	-	-	Organic acids and derivatives	Carboxylic acids and derivatives	246.145	0.0022304082728499997	54.4	-0.95187	-	Amino acids, peptides, and analogues	4.699440366319999	4.6985	4.664931049930001	4.72734	4.74498	4.71651	4.67574	4.66471	4.699564773830001
pos_743	Gallocatechin	没食子儿茶精	metab_719	B(i)	91.4	0	Flavonoids	类黄酮	Flavanol	黄烷醇	C18	Secondary metabolite	map00941;map01110	Flavonoid biosynthesis;Biosynthesis of secondary metabolites	HMDB0038361	M+H	C15H14O7	0.982067	类黄酮生物合成;次级代谢产物的生物合成	C12136	pos	-	-	Metabolism;Metabolism	Biosynthesis of other secondary metabolites;Global and overview maps	Phenylpropanoids and polyketides	Flavonoids	307.083	0.0007660447119439999	53.8	6.85103152986626	970-74-1	Flavans	4.92443	4.873281395019999	4.84969	4.6117773167500005	4.70465	4.63921	4.27956	4.23736	4.261168176619999
pos_752	Benzofuran	苯并呋喃	metab_728	B(i)	80.7	0	Others	其他类	Others	其他类	C18	Others	-	-	HMDB0032929	M+H	C8H6O	1.00125	-	C14512	pos	-	-	-	-	Organoheterocyclic compounds	Benzofurans	119.049	0.00208698510431	55.6	1.32479904983638	271-89-6	Not Available	4.00379	3.98705	3.98494	3.81603	3.84076	3.78277	4.05769	4.07126	4.04172
pos_754	Chromone	色酮	metab_730	B(ii)	0	45.6	Others	其他类	Benzopyrans	苯骈吡喃类	C18	Others	-	-	HMDB0032938	M+H	C9H6O2	1.00125	-	-	pos	-	-	-	-	Organoheterocyclic compounds	Benzopyrans	147.044	0.00225310554449	47.2	-0.936952	491-38-3	1-benzopyrans	4.6555	4.56956	4.58723	4.62309	4.62999	4.55325	4.62617	4.6876	4.71182
pos_755	2-Hydroxy-3-phenylpropenoate	-	metab_731	B(i)	94.9	0	Organic acids and derivatives	有机酸及其衍生物	Organic acids and derivatives	有机酸及其衍生物	C18	Secondary metabolite	map01100;map00360	Metabolic pathways;Phenylalanine metabolism	HMDB0012225	M+H	C9H8O3	1.00125	代谢途径;苯丙氨酸代谢	C02763	pos	-	-	Metabolism;Metabolism	Global and overview maps;Amino acid metabolism	Benzenoids	Benzene and substituted derivatives	165.055	0.0016958301020999998	58.8	-0.33745	-	Phenylpyruvic acid derivatives	5.14617	5.13029	5.12189	4.939006034969999	4.94598	4.92739	5.19929	5.17962	5.20066
pos_760	D-erythro-L-galacto-Nonulose	-	metab_736	B(ii)	0	65.8	Carbohydrates and derivatives	碳水化合物及其衍生物	C-glycosyl compounds	C-糖基化合物	C18	Primary metabolite	-	-	HMDB0029955	M+Na-H2O	C9H18O9	1.00125	-	-	pos	-	-	-	-	Organic oxygen compounds	Organooxygen compounds	275.07565790900003	0.00509567202817	50.5	5.09359806772587	-	Carbohydrates and carbohydrate conjugates	2.05823	2.0626679729700004	2.07203	2.16642	2.15455	2.16099	2.15947	2.1633	2.15677
pos_770	Adenosine	腺苷	metab_744	B(i)	97.9	0	Nucleotides and derivatives	核苷酸及其衍生物	Nucleotides and derivatives	核苷酸及其衍生物	C18	Primary metabolite	map01100;map02010;map01232;map00230	Metabolic pathways;ABC transporters;Nucleotide metabolism;Purine metabolism	HMDB0000050;HMDB0247583;PW_C000034	M+H	C10H13N5O4	1.0212166666700002	代谢途径;ABC转运器;核苷酸代谢;嘌呤代谢	C00212	pos	Nucleic acids	Nucleosides	Metabolism;Environmental Information Processing;Metabolism;Metabolism	Global and overview maps;Membrane transport;Global and overview maps;Nucleotide metabolism	Nucleosides, nucleotides, and analogues	Purine nucleosides	268.104	0.000640540882591	56.8	-1.04033	58-61-7	Not Available	6.679485927230001	6.67792	6.67188	6.68278	6.66985	6.68339	6.71064	6.71194	6.70048
pos_776	2-Hydroxyphenethyl alcohol	-	metab_750	B(i)	78.9	0	Others	其他类	Others	其他类	C18	Others	-	-	-	M+H	C8H10O2	1.0427666666700002	-	-	pos	-	-	-	-	-	-	139.075	0.0028335629867500003	54.8	-0.0275823	-	-	3.65279	3.58883	3.55047	3.71466	3.70419	3.70184	3.65627	3.6759750853199993	3.67387
pos_777	(E)-indol-3-ylacetaldoxime	（E） -吲哚-3-基乙醛肟	metab_751	B(ii)	0	52.1	Indoles and derivatives	吲哚及其衍生物	Indoles and derivatives	吲哚及其衍生物	C18	Secondary metabolite	map01100;map01210;map01110;map00380;map00966	Metabolic pathways;2-Oxocarboxylic acid metabolism;Biosynthesis of secondary metabolites;Tryptophan metabolism;Glucosinolate biosynthesis	HMDB0303989	M+H	C10H10N2O	1.0427666666700002	代谢途径;2-氧代羧酸代谢;次级代谢产物的生物合成;色氨酸代谢;硫代葡萄糖苷生物合成	C02937	pos	-	-	Metabolism;Metabolism;Metabolism;Metabolism;Metabolism	Global and overview maps;Global and overview maps;Global and overview maps;Amino acid metabolism;Biosynthesis of other secondary metabolites	Organoheterocyclic compounds	Indoles and derivatives	175.087	0.00216391590812	48.9	-0.136859	-	Indoles	2.86615	2.9561	2.9991	3.35449	3.25706	3.2926	3.0046942214200003	3.0735025838200003	3.10099
pos_784	P-Tolualdehyde	-	metab_758	B(i)	92	0	Others	其他类	Others	其他类	C18	Others	map01100	Metabolic pathways	HMDB0029638;HMDB0303310	M+H	C8H8O	1.0617166666700002	代谢途径	C06758	pos	-	-	Metabolism	Global and overview maps	Benzenoids	Benzene and substituted derivatives	121.06494041399999	0.0022836927197899997	57.9	1.2419560322906398	104-87-0	Benzoyl derivatives	4.29238	4.24202	4.24467	4.7312372847300015	4.72017	4.72841	4.54625	4.53976	4.54871
pos_786	Tyramine	酪胺	metab_760	B(i)	82.3	0	Others	其他类	Amines and derivatives	胺类及其衍生物	C18	Others	map01100;map00950;map01110;map00350;map01240	Metabolic pathways;Isoquinoline alkaloid biosynthesis;Biosynthesis of secondary metabolites;Tyrosine metabolism;Biosynthesis of cofactors	HMDB0000306;PW_C000210	M+H	C8H11NO	1.0617166666700002	代谢途径;异喹啉生物碱生物合成;次级代谢产物的生物合成;酪氨酸代谢;辅助因子的生物合成	C00483	pos	Peptides	Amines	Metabolism;Metabolism;Metabolism;Metabolism;Metabolism	Global and overview maps;Biosynthesis of other secondary metabolites;Global and overview maps;Amino acid metabolism;Global and overview maps	Benzenoids	Benzene and substituted derivatives	138.091	0.000219779587983	55.8	-0.348137	51-67-2	Phenethylamines	3.60337	3.57803	3.64386	4.12539	4.10537	4.14048	3.92141	3.92007	3.9187162565300007
pos_789	Erinapyrone A	猴头菌吡喃酮A	metab_763	B(ii)	0	53.4	Others	其他类	Others	其他类	C18	Others	-	-	HMDB0041426	M+K	C7H10O3	1.0617166666700002	-	-	pos	-	-	-	-	Organoheterocyclic compounds	Pyrans	181.026	0.0010741762759	50.1	-1.54908	146064-66-6	Pyranones and derivatives	4.31207	4.33758	4.33212	4.411	4.38323	4.40409	4.36395	4.37777	4.36838
pos_791	Deoxyadenosine	脱氧腺苷	metab_765	B(i)	99.2	0	Nucleotides and derivatives	核苷酸及其衍生物	Nucleotides and derivatives	核苷酸及其衍生物	C18	Primary metabolite	map01100;map02010;map01232;map00230	Metabolic pathways;ABC transporters;Nucleotide metabolism;Purine metabolism	HMDB0000101;PW_C000068	M+H	C10H13N5O3	1.0617166666700002	代谢途径;ABC转运器;核苷酸代谢;嘌呤代谢	C00559	pos	Nucleic acids	Nucleosides	Metabolism;Environmental Information Processing;Metabolism;Metabolism	Global and overview maps;Membrane transport;Global and overview maps;Nucleotide metabolism	Nucleosides, nucleotides, and analogues	Purine nucleosides	252.109	0.0010169344301799998	57.2	-0.911058	958-09-8	Purine 2''-deoxyribonucleosides	5.81884	5.798835351209999	5.78773	5.9380312373000015	5.937591287590001	5.91877	5.85925	5.85954	5.86106
pos_792	Guanosine	鸟苷	metab_766	B(i)	95.1	0	Nucleotides and derivatives	核苷酸及其衍生物	Nucleotides and derivatives	核苷酸及其衍生物	C18	Primary metabolite	map01100;map02010;map01232;map00230	Metabolic pathways;ABC transporters;Nucleotide metabolism;Purine metabolism	HMDB0000133;PW_C000087	M+H	C10H13N5O5	1.0617166666700002	代谢途径;ABC转运器;核苷酸代谢;嘌呤代谢	C00387	pos	Nucleic acids	Nucleosides	Metabolism;Environmental Information Processing;Metabolism;Metabolism	Global and overview maps;Membrane transport;Global and overview maps;Nucleotide metabolism	Nucleosides, nucleotides, and analogues	Purine nucleosides	284.09862514900004	0.0025055218266799998	58.2	-1.12975	118-00-3	Not Available	5.76487	5.74629	5.7309757158700005	5.668637786919999	5.6722532559399985	5.63929	5.693916510169999	5.69485	5.70955
pos_804	3-Methylbutyl glucosinolate	3 -甲基丁基硫代葡萄糖苷	metab_778	B(ii)	0	49.4	Carbohydrates and derivatives	碳水化合物及其衍生物	Other carbohydrates and derivatives	其他类碳水化合物及其衍生物	C18	Primary metabolite	-	-	HMDB0038412	M+H	C12H23NO9S2	1.0830666666700002	-	-	pos	-	-	-	-	Organic oxygen compounds	Organooxygen compounds	390.08496216099996	0.0048620490640699995	44.9	-9.60619	76265-22-0	Carbohydrates and carbohydrate conjugates	1.5870679439200002	1.59143	1.60063	1.69359	1.68189	1.68824	1.68674	1.69052	1.68408
pos_815	Arg-Ile-Glu	-	metab_789	B(i)	84.8	0	Others	其他类	Others	其他类	C18	Others	-	-	-	M+H	C17H32N6O6	1.10427	-	-	pos	-	-	-	-	-	-	417.245	0.0200549931737	55.9	-0.46685	-	-	3.65666	3.86233	3.84975	3.80268	3.77333	3.96962	3.89397	3.92258	3.77393
pos_829	Piperidine	哌啶	metab_803	B(i)	74.7	0	Others	其他类	Piperidines	哌啶类	C18	Others	map00960	Tropane, piperidine and pyridine alkaloid biosynthesis	HMDB0034301	M+H	C5H11N	1.16898	莨菪烷、哌啶和吡啶生物碱的生物合成	C01746	pos	-	-	Metabolism	Biosynthesis of other secondary metabolites	Organoheterocyclic compounds	Piperidines	86.09693530610001	0.0014718169228399999	52.5	5.988031675437339	110-89-4	Not Available	5.65947	5.6595	5.64253	5.39461	5.405126469369999	5.391581604550001	5.63926	5.62549	5.61883
pos_833	Val-Ala	-	metab_807	B(i)	72.1	0	Others	其他类	Others	其他类	C18	Others	-	-	HMDB0029120	M+H-H2O	C8H16N2O3	1.16898	-	-	pos	-	-	-	-	Organic acids and derivatives	Carboxylic acids and derivatives	171.113	0.00303946613922	53.4	-0.481827	27493-61-4	Amino acids, peptides, and analogues	4.0522600195999985	4.02945	4.02807	3.97155	3.96804	3.98202	4.07282	4.08267	4.0651744917500015
pos_836	3,8-Dihydroxy-6-methoxy-7(11)-eremophilen-12,8-olide	3,8-二羟基-6-甲氧基-7（11）-eremophilen-12,8-内酯	metab_810	B(ii)	0	59	Others	其他类	Others	其他类	C18	Others	-	-	HMDB0041551	M+NH4	C16H24O5	1.16898	-	-	pos	-	-	-	-	Lipids and lipid-like molecules	Prenol lipids	314.196	0.006265248165880001	50.6	-0.965601	-	Terpene lactones	3.42959	3.4340586494400003	3.4434986278500004	3.53858	3.52663	3.5331129166199995	3.53158	3.53544	3.5288695760900004
pos_843	D-manno-2-Heptulose	D -甘露- 2 -庚酮糖	metab_817	B(ii)	0	41.3	Carbohydrates and derivatives	碳水化合物及其衍生物	C-glycosyl compounds	C-糖基化合物	C18	Primary metabolite	-	-	HMDB0029935	M+H-2H2O	C7H14O7	1.21337	-	C08236	pos	-	-	-	-	Organic oxygen compounds	Organooxygen compounds	175.06010835400002	0.00599986363243	47.7	0.0404989510804563	60426-75-7	Carbohydrates and carbohydrate conjugates	3.37142	3.3778668312800004	3.3990593434900003	3.48017	3.42758	3.4971909047900005	3.56186	3.5501881696699997	3.54174
pos_863	3-(4-Hydroxy-3-methoxyphenyl)-2-methylpropionic acid	3-（4-羟基-3-甲氧基苯基）-2-甲基丙酸	metab_837	B(ii)	0	52	Phenolic acids and derivatives	酚酸类及其衍生物	Phenylpropanoic acids and derivatives	苯丙酸及其衍生物	C18	Secondary metabolite	-	-	HMDB0060737	M+NH4	C11H14O4	1.28135	-	-	pos	-	-	-	-	Phenylpropanoids and polyketides	Phenylpropanoic acids	228.123	0.00267423816284	49.6	-0.697499	-	Not Available	3.39363	3.28679	3.38408	3.24271	3.16812	3.1301	2.7076	2.69298	2.83681
pos_871	Leu-Glu	-	metab_845	B(i)	72.6	0	Others	其他类	Others	其他类	C18	Others	-	-	HMDB0028928	M+H	C11H20N2O5	1.30415	-	-	pos	-	-	-	-	Organic acids and derivatives	Carboxylic acids and derivatives	261.144	0.000280004138076	53.9	-0.575171	-	Amino acids, peptides, and analogues	5.01937	5.01593	5.027583432169999	5.0685926099800005	5.07817	5.10205	5.10087	5.0861686849800005	5.04955
pos_874	IPA imine	-	metab_848	B(i)	91.5	0	Indoles and derivatives	吲哚及其衍生物	Indoles and derivatives	吲哚及其衍生物	C18	Secondary metabolite	map01100;map01110	Metabolic pathways;Biosynthesis of secondary metabolites	-	M+H	C11H10N2O2	1.3269666666700002	代谢途径;次级代谢产物的生物合成	C21124	pos	-	-	Metabolism;Metabolism	Global and overview maps;Global and overview maps	-	-	203.081	0.0009147068034319999	58	-0.312254	-	-	3.75548	3.72905	3.76677	3.90099	3.89694	3.90467	3.7676	3.78885	3.73946
pos_901	Pyridoxal	吡哆醛	metab_875	B(ii)	0	70.2	Others	其他类	Pyridines and derivatives	吡啶及其衍生物	C18	Others	map01100;map00750;map01240	Metabolic pathways;Vitamin B6 metabolism;Biosynthesis of cofactors	HMDB0001545	M+H	C8H9NO3	1.46343	代谢途径;维生素B6代谢;辅助因子的生物合成	C00250	pos	Vitamins and cofactors	Vitamins	Metabolism;Metabolism;Metabolism	Global and overview maps;Metabolism of cofactors and vitamins;Global and overview maps	Organoheterocyclic compounds	Pyridines and derivatives	168.066	0.000936772929518	53.1	-0.0617191	66-72-8	Pyridine carboxaldehydes	4.54706	4.52339	4.54332	4.557137586650001	4.54908	4.560061402350001	4.5871	4.59995	4.588676243819999
pos_911	Kaempferol 3-sophorotrioside	山柰酚3 -麦冬皂苷	metab_885	B(i)	63.5	0	Flavonoids	类黄酮	Flavonoid glycosides	黄酮糖苷	C18	Secondary metabolite	map01110;map00944	Biosynthesis of secondary metabolites;Flavone and flavonol biosynthesis	HMDB0032008;LMPK12111744	M+H	C33H40O21	1.4862	次级代谢产物的生物合成;黄酮和黄酮醇生物合成	C12635	pos	-	-	Metabolism;Metabolism	Global and overview maps;Biosynthesis of other secondary metabolites	Phenylpropanoids and polyketides	Flavonoids	773.213	0.00155312166039	52.3	-0.285658	80714-53-0	Flavonoid glycosides	2.89418	2.8986474443700003	2.90808	5.15837	5.18065	5.20748	6.50461	6.4895	6.480849200930001
pos_914	Ile-Ala	-	metab_888	B(i)	55.7	0	Amino acids and derivatives	氨基酸及其衍生物	Dipeptides	二肽	C18	Primary metabolite	-	-	HMDB0028900	M+H	C9H18N2O3	1.5091666666699999	-	-	pos	-	-	-	-	Organic acids and derivatives	Carboxylic acids and derivatives	203.13903098900002	0.00185535403631	50.7	0.0599165672985959	-	Amino acids, peptides, and analogues	4.859677335530001	4.86916	4.87174	4.904311658319999	4.897543054140001	4.91965	4.98926	4.9845	4.97341
pos_930	6-methylhept-5-en-2-ol	6 -甲基庚- 5 -烯- 2 -醇	metab_904	B(i)	46.7	0	Lipids	脂质	Fatty Acyls	脂肪酰类	C18	Primary metabolite	-	-	HMDB0030030;LMFA05000566	M+H-H2O	C8H16O	1.60005	-	C07288	pos	-	-	-	-	Lipids and lipid-like molecules	Fatty Acyls	111.117	0.00269940432288	48.5	2.1545921299284596	1569-60-4;4630-06-2	Fatty alcohols	4.95309	4.93436	4.92032	4.8916	4.851553116580001	4.920336524700001	4.99668	4.99336	4.96256
pos_936	Bergenin	岩白菜内酯	metab_910	B(ii)	0	44.2	Phenolic acids and derivatives	酚酸类及其衍生物	Benzoic acids and derivatives	苯甲酸及其衍生物	C18	Secondary metabolite	-	-	HMDB0249087	M+H-H2O	C14H16O9	1.60005	-	C09919	pos	-	-	-	-	Benzenoids	Benzene and substituted derivatives	311.07352910099996	0.00254882751273	46.2	-7.96983	477-90-7	Benzoic acids and derivatives	3.41669	3.42116	3.4306	3.5256809009699994	3.5137379872199994	3.52022	3.51869	3.5225478984900005	3.51597
pos_947	4-hydroxycoumarin	-	metab_921	B(i)	41.6	0	Coumarins and derivatives	香豆素类及其衍生物	Coumarins and derivatives	香豆素类及其衍生物	C18	Secondary metabolite	-	-	-	M+H	C9H6O3	1.66843	-	C20414	pos	-	-	-	-	-	-	163.03893761700002	0.000984817484316	47.8	-0.202836	1076-38-6	-	4.82128	4.79354	4.76012	4.73772	4.67764	4.80985	4.82397	4.86374	4.86106
pos_955	Salicylic acid	水杨酸	metab_929	B(i)	82.3	0	Phenolic acids and derivatives	酚酸类及其衍生物	Benzoic acids and derivatives	苯甲酸及其衍生物	C18	Secondary metabolite	map01100;map00996;map01110;map04075	Metabolic pathways;Biosynthesis of various alkaloids;Biosynthesis of secondary metabolites;Plant hormone signal transduction	HMDB0001895;PW_C001263	M+H	C7H6O3	1.71417	代谢途径;各种生物碱的生物合成;次级代谢产物的生物合成;植物激素信号转导	C00805	pos	-	-	Metabolism;Metabolism;Metabolism;Environmental Information Processing	Global and overview maps;Biosynthesis of other secondary metabolites;Global and overview maps;Signal transduction	Benzenoids	Benzene and substituted derivatives	139.039	0.00138534178969	56	0.18678943022584502	69-72-7	Benzoic acids and derivatives	3.98612	3.95609	3.99845	4.41217	4.42729	4.4178	4.16131	4.1446095231300015	4.14399
pos_968	L-Gulonolactone	L-古洛糖酸内脂	metab_942	B(ii)	0	41.4	Others	其他类	Lactones	内酯类	C18	Others	map01100;map00053;map01240	Metabolic pathways;Ascorbate and aldarate metabolism;Biosynthesis of cofactors	HMDB0003466	M+H-H2O	C6H10O6	1.78263	代谢途径;抗坏血酸和醛酸代谢;辅助因子的生物合成	C01040	pos	-	-	Metabolism;Metabolism;Metabolism	Global and overview maps;Carbohydrate metabolism;Global and overview maps	Organoheterocyclic compounds	Lactones	161.044	0.00517653986862	47.8	0.0345698973289001	1128-23-0	Gamma butyrolactones	3.61331	3.60172	3.62385	3.60606	3.58964	3.59605	3.57596	3.5410007196300004	3.5790611988800003
pos_971	Val-Val	-	metab_945	B(i)	86.5	0	Amino acids and derivatives	氨基酸及其衍生物	Other peptides	其他肽	C18	Primary metabolite	-	-	HMDB0029140	M+H	C10H20N2O3	1.8054666666699999	-	-	pos	-	-	-	-	Organic acids and derivatives	Carboxylic acids and derivatives	217.155	0.0013413614525599998	56.7	-0.316449	3918-94-3	Amino acids, peptides, and analogues	4.42484	4.43539	4.39898	4.56901	4.57393	4.56971	4.42129	4.39864	4.4227849281900005
pos_973	2-Hydroxybenzaldehyde O-[xylosyl-(1->6)-glucoside]	2-羟基苯甲醛O-[木糖基-（1->6）-葡萄糖苷]	metab_947	B(ii)	0	60.3	Carbohydrates and derivatives	碳水化合物及其衍生物	Glycosides	糖苷类	C18	Primary metabolite	-	-	HMDB0034157	M+CH3OH+Na	C18H24O11	1.8054666666699999	-	-	pos	-	-	-	-	Organic oxygen compounds	Organooxygen compounds	471.15	0.0018318260632300002	50.3	5.566177305581699	14907-56-3	Carbohydrates and carbohydrate conjugates	2.13045	2.13489	2.14426	4.72356	4.73732	4.69245	3.33982	3.3733	3.38865
pos_978	Phe-Ser	-	metab_952	B(i)	66.8	0	Others	其他类	Others	其他类	C18	Others	-	-	HMDB0029004	M+H	C12H16N2O4	1.82825	-	-	pos	-	-	-	-	Organic acids and derivatives	Carboxylic acids and derivatives	253.118	0.00269780374577	52.6	-0.821464	16053-39-7	Amino acids, peptides, and analogues	4.54724	4.54582	4.55135	4.69569	4.69837	4.69352	4.78488	4.75756	4.78929
pos_983	Glutaraldehyde	-	metab_957	B(i)	47.6	0	Others	其他类	Aldehydes and derivatives	醛类及其衍生物	C18	Others	-	-	HMDB0029599	M+H	C5H8O2	1.87365	-	C12518	pos	-	-	-	-	Organic oxygen compounds	Organooxygen compounds	101.06009306799999	0.0028931058960999997	47.7	3.8693787531458996	111-30-8	Carbonyl compounds	3.90409	3.842703684740001	3.82853	3.98191	3.98425	3.95666	3.92979	3.94986	3.97066
pos_984	N-methyl-l-glutamic acid	-	metab_958	B(i)	48.9	0	Amino acids and derivatives	氨基酸及其衍生物	Glutamic acid and derivatives	谷氨酸及其衍生物	C18	Primary metabolite	map01100	Metabolic pathways	HMDB0062660	M+H-H2O	C6H11NO4	1.87365	代谢途径	C01046	pos	-	-	Metabolism	Global and overview maps	Organic acids and derivatives	Carboxylic acids and derivatives	144.066	0.00663903283253	49.1	0.0032637472633261	35989-16-3	Amino acids, peptides, and analogues	3.9347439728300007	3.92233	3.94412	3.85088	3.85303	3.81656	3.87328	3.8421	3.88245
pos_993	5-Phenyl-1,3-oxazinane-2,4-dione	5 -苯基- 1,3-噁嗪烷- 2，4 -二酮	metab_967	B(ii)	0	58.7	Others	其他类	Others	其他类	C18	Others	-	-	HMDB0060400	M+H	C10H9NO3	1.8965	-	C16596	pos	-	-	-	-	Benzenoids	Benzene and substituted derivatives	192.06548556599998	0.0010335804766	51.3	-0.178051	-	Not Available	4.95832	4.9714	4.96762	4.758964758409999	4.7465981302800015	4.75486	4.7111	4.69146	4.68571
pos_995	Hydroxyphenylacetylglycine	羟基苯乙酰基甘氨酸	metab_969	B(ii)	0	70.8	Amino acids and derivatives	氨基酸及其衍生物	Alpha amino acids and derivatives	Alpha氨基酸及其衍生物	C18	Primary metabolite	map00350	Tyrosine metabolism	HMDB0000735	M+H	C10H11NO4	1.8965	酪氨酸代谢	C05596	pos	-	-	Metabolism	Amino acid metabolism	Organic acids and derivatives	Carboxylic acids and derivatives	210.076	0.000968615229041	53.9	-0.276097	28116-23-6	Amino acids, peptides, and analogues	5.813995565369999	5.83133	5.82449	5.60066	5.59727	5.6253576555299984	5.57405	5.5612	5.5496727092799985
pos_1011	5-O-Galloylhamamelofuranose	5 - O -没食子酰基呋喃糖	metab_984	B(ii)	0	63.1	Phenolic acids and derivatives	酚酸类及其衍生物	Benzoic acids and derivatives	苯甲酸及其衍生物	C18	Secondary metabolite	-	-	HMDB0039366	M+H	C13H16O10	1.98408	-	-	pos	-	-	-	-	Benzenoids	Benzene and substituted derivatives	333.08141195400003	0.00155249281585	52.2	-0.635963	90275-97-1	Benzoic acids and derivatives	3.50736	3.51183	3.5212728584400006	3.61636	3.60441	3.61089	3.60936	3.61322	3.60665
pos_1025	1,3-Dimethoxybenzene	1，3 -二甲氧基苯	metab_997	B(i)	37.8	0	Others	其他类	Others	其他类	C18	Others	-	-	HMDB0029672	M+H-2H2O	C8H10O2	2.04915	-	-	pos	-	-	-	-	Benzenoids	Benzene and substituted derivatives	103.05457430700001	0.00129238536342	45.3	2.51823343974324	151-10-0	Methoxybenzenes	4.06523	4.07648	4.09969	4.48867	4.489851509969999	4.49671	4.36344	4.35807	4.3331105053300005
pos_1028	4-Hydroxy-2,6-dimethylaniline	4 -羟基- 2，6 -二甲基苯胺	metab_1000	B(ii)	0	52.4	Others	其他类	Others	其他类	C18	Others	-	-	HMDB0060681	M+H-H2O	C8H11NO	2.04915	-	C16570	pos	-	-	-	-	Benzenoids	Phenols	120.08094309399999	0.0014744022081300003	48.5	1.22090337707486	3096-70-6	Cresols	5.860923383169999	5.861130242180001	5.866932546059999	6.214645492740001	6.21785	6.23177	6.09356	6.08589	6.07042
pos_1036	Tyr-Gln-His	-	metab_1008	B(i)	42.9	0	Others	其他类	Others	其他类	C18	Others	-	-	-	M+H-H2O	C20H26N6O6	2.04915	-	-	pos	-	-	-	-	-	-	429.187	0.0103825817814	46.8	-3.19809	-	-	0.7051775228849999	0.7087728104250001	0.7163857762800001	0.794766	0.784758	0.790181	0.788898	0.792136	0.786627
pos_1049	Val-Pro	-	metab_1021	B(i)	79.7	0	Others	其他类	Others	其他类	C18	Others	-	-	HMDB0029135	M+H	C10H18N2O3	2.11513	-	-	pos	-	-	-	-	Organic acids and derivatives	Carboxylic acids and derivatives	215.13899426900002	0.0010344197778	55.2	-0.114921	20488-27-1	Amino acids, peptides, and analogues	4.648763422169999	4.5915396278400005	4.5904785497199985	4.63106	4.65376	4.60857	4.54617	4.50066	4.55816
pos_1091	Dianthoside	-	metab_1063	B(i)	76.1	0	Carbohydrates and derivatives	碳水化合物及其衍生物	O-glycosyl compounds	O-糖基化合物	C18	Primary metabolite	-	-	-	M+H	C12H16O8	2.20472	-	-	pos	-	-	-	-	-	-	289.092	0.00124442949246	54.9	-0.40642	-	-	3.7805	3.74545	3.74107	3.90159	3.9533546946699993	3.88626	3.80132	3.73582	3.76219
pos_1095	Malvidin 3-(6''-acetyl-galactoside)	Malvidin 3-（6’’-乙酰半乳糖苷）	metab_1067	B(ii)	0	50.1	Flavonoids	类黄酮	Anthocyanidin	花青素	C18	Secondary metabolite	-	-	HMDB0301662	M+ACN+Na	C25H27O13+	2.20472	-	-	pos	-	-	-	-	Phenylpropanoids and polyketides	Flavonoids	599.158	0.00300558480689	48.5	-4.74252	75-07-0	Flavonoid glycosides	0.72784	0.73148	0.7391863176029999	0.818438	0.808327	0.8138062707379999	0.8125103398129999	0.815781	0.8102160548080001
pos_1117	3-Hydroxy-5-methylbenzaldehyde	-	metab_1087	B(i)	87.5	0	Others	其他类	Aldehydes and derivatives	醛类及其衍生物	C18	Others	-	-	-	M+H	C8H8O2	2.27278	-	-	pos	-	-	-	-	-	-	137.06	0.0006921591229010001	57.2	0.44933935290437105	-	-	4.513583260919999	4.49841	4.4935	5.72606	5.739922012719999	5.76538	4.509655154140001	4.50033	4.48737
pos_1120	Urolithin D	尿石素D	metab_1090	B(ii)	0	60.9	Coumarins and derivatives	香豆素类及其衍生物	Coumarins and derivatives	香豆素类及其衍生物	C18	Secondary metabolite	-	-	HMDB0029219	M+NH4	C13H8O6	2.27278	-	-	pos	-	-	-	-	Phenylpropanoids and polyketides	Coumarins and derivatives	278.06584794400004	0.0009574897139410001	51.5	-0.252124	-	Hydroxycoumarins	2.13222	2.13666	2.14604	2.24054	2.22866	2.2351	2.23358	2.23742	2.23088
pos_1131	Protocatechuic acid	原儿茶酸	metab_1101	B(i)	52.9	0	Phenolic acids and derivatives	酚酸类及其衍生物	Benzoic acids and derivatives	苯甲酸及其衍生物	C18	Secondary metabolite	map01100;map00400;map01110	Metabolic pathways;Phenylalanine, tyrosine and tryptophan biosynthesis;Biosynthesis of secondary metabolites	HMDB0001856	M+H	C7H6O4	2.29492	代谢途径;苯丙氨酸、酪氨酸和色氨酸生物合成;次级代谢产物的生物合成	C00230	pos	-	-	Metabolism;Metabolism;Metabolism	Global and overview maps;Amino acid metabolism;Global and overview maps	Benzenoids	Benzene and substituted derivatives	155.03387796799998	0.0027348464294299994	50	-0.046324	99-50-3	Benzoic acids and derivatives	3.13235	3.0601141807200003	3.08774	3.31603	3.36489	3.32303	4.6264	4.6113	4.61969
pos_1152	Ser-Leu	丝氨酰-亮氨酸	metab_1122	B(i)	79.2	0	Amino acids and derivatives	氨基酸及其衍生物	Dipeptides	二肽	C18	Primary metabolite	-	-	HMDB0258242	M+H	C9H18N2O4	2.31773	-	-	pos	-	-	-	-	Organic acids and derivatives	Carboxylic acids and derivatives	219.134	0.000792748656171	55.2	0.05557880668863299	-	Amino acids, peptides, and analogues	4.789850122840001	4.7931	4.78049	4.85915	4.8778476509300015	4.87254	4.79305	4.777782085769999	4.80565
pos_1155	Leu-Val-Gly	-	metab_1125	B(i)	75.6	0	Amino acids and derivatives	氨基酸及其衍生物	Oligopeptides	寡肽	C18	Primary metabolite	-	-	-	M+H	C13H25N3O4	2.31773	-	-	pos	-	-	-	-	-	-	288.192	0.000813257702152	54.1	0.037364221537247	-	-	4.192755741530002	4.19159	4.17173	4.2819	4.30875	4.3004	4.29439	4.27026	4.28173
pos_1166	7-Hydroxy-1(3H)-isobenzofuranone	-	metab_1136	B(i)	57	0	Others	其他类	Others	其他类	C18	Others	-	-	-	M+H	C8H6O3	2.34032	-	-	pos	-	-	-	-	-	-	151.039	0.00124237238576	50.6	0.8845496147598549	-	-	3.11452	3.0826660936900003	3.11464	3.8631034247099993	3.85003	3.88253	3.2750401746499995	3.2166	3.28573
pos_1169	3,4-Dihydroxymandelaldehyde	3，4 -二羟基扁桃醛	metab_1139	B(i)	96.9	0	Others	其他类	Aldehydes and derivatives	醛类及其衍生物	C18	Others	map01100;map00350	Metabolic pathways;Tyrosine metabolism	HMDB0006242;PW_C002683	M+H	C8H8O4	2.34032	代谢途径;酪氨酸代谢	C05577	pos	-	-	Metabolism;Metabolism	Global and overview maps;Amino acid metabolism	Benzenoids	Benzene and substituted derivatives	169.04950357299998	0.0007872521824590001	59.2	-0.18801	13023-73-9	Phenylacetaldehydes	3.57006	3.57223	3.5440112583699994	4.91153	4.90216	4.926052406569998	3.91051	3.91311	3.93107
pos_1177	Dide-O-methylsimmondsin	-	metab_1147	B(ii)	0	67.4	Carbohydrates and derivatives	碳水化合物及其衍生物	O-glycosyl compounds	O-糖基化合物	C18	Primary metabolite	-	-	HMDB0041207	M+H	C14H21NO9	2.34032	-	-	pos	-	-	-	-	Organic oxygen compounds	Organooxygen compounds	348.129	0.000944272540964	52.6	-0.47661	135074-86-1	Carbohydrates and carbohydrate conjugates	3.11389	3.05999	3.1335900160100003	4.73285	4.71564	4.74113	3.59191	3.60364	3.58761
pos_1178	Thr-Ala-Tyr	-	metab_1148	B(i)	53.3	0	Others	其他类	Others	其他类	C18	Others	-	-	-	M+H	C16H23N3O6	2.34032	-	-	pos	-	-	-	-	-	-	354.166	0.00245141002727	49.7	-0.0175015	-	-	3.4072915471200003	3.25405	3.32034	3.23538	3.29624	3.2063356041000004	3.49219	3.38529	3.57702
pos_1189	Ile-Asn	-	metab_1159	B(i)	95.4	0	Amino acids and derivatives	氨基酸及其衍生物	Dipeptides	二肽	C18	Primary metabolite	-	-	HMDB0028902	M+H	C10H19N3O4	2.36327	-	-	pos	-	-	-	-	Organic acids and derivatives	Carboxylic acids and derivatives	246.14472242099998	0.0007312823798220001	56.5	-0.449187	-	Amino acids, peptides, and analogues	4.20382	4.20662	4.18557	4.37683	4.40034	4.39296	4.25799	4.25656	4.28803
pos_1191	Glu-Pro-Ala	-	metab_1161	B(i)	69.1	0	Others	其他类	Others	其他类	C18	Others	-	-	-	M+H	C13H21N3O6	2.36327	-	-	pos	-	-	-	-	-	-	316.15	0.00603985735814	52.8	-0.485948	-	-	2.94997	3.01215	2.88225	2.51806	2.7115636178900004	2.81639	2.88416	2.881272360390001	2.85596
pos_1204	Ala-Ser-Leu	-	metab_1174	B(i)	64.5	0	Others	其他类	Others	其他类	C18	Others	-	-	-	M+CH3OH+Na	C12H23N3O5	2.38612	-	-	pos	-	-	-	-	-	-	344.181	0.0011092011711099998	50.5	7.89841508234194	-	-	4.30219	4.2775359272900015	4.2598910401699985	4.155832521690002	4.21788	4.1816	4.62718	4.62834	4.648938328440001
pos_1210	Vanillyl alcohol	-	metab_1180	B(i)	69.2	0	Others	其他类	Others	其他类	C18	Others	-	-	HMDB0032012	M+H-2H2O	C8H10O3	2.40853	-	C06317	pos	-	-	-	-	Benzenoids	Phenols	119.049	0.0026599259030500003	52.8	1.3482435286533099	498-00-0	Methoxyphenols	2.90051	2.92236	2.9289768672900003	4.26001	4.28336	4.30803	3.47816	3.4062	3.41585
pos_1215	2-Hydroxycinnamic acid	2 -羟基肉桂酸	metab_1185	B(i)	91.1	0	Phenolic acids and derivatives	酚酸类及其衍生物	Cinnamic acids and derivatives	肉桂酸及其衍生物	C18	Secondary metabolite	map01100;map00360;map01110;map00999	Metabolic pathways;Phenylalanine metabolism;Biosynthesis of secondary metabolites;Biosynthesis of various plant secondary metabolites	HMDB0002641	M+H	C9H8O3	2.40853	代谢途径;苯丙氨酸代谢;次级代谢产物的生物合成;各种植物次生代谢产物的生物合成	C01772	pos	-	-	Metabolism;Metabolism;Metabolism;Metabolism	Global and overview maps;Amino acid metabolism;Global and overview maps;Biosynthesis of other secondary metabolites	Phenylpropanoids and polyketides	Cinnamic acids and derivatives	165.055	0.0020165196244100003	57.5	0.212048001734668	614-60-8	Hydroxycinnamic acids and derivatives	4.089987774180002	4.10925	4.11288	5.32747	5.34673	5.36306	4.5915611403800005	4.5727	4.57105
pos_1223	Met-Hyp	-	metab_1193	B(ii)	0	48.7	Others	其他类	Others	其他类	C18	Others	-	-	HMDB0028974	M+H	C10H18N2O4S	2.40853	-	-	pos	-	-	-	-	Organic acids and derivatives	Carboxylic acids and derivatives	263.106	0.00376916491331	48	-0.338208	148305-57-1	Amino acids, peptides, and analogues	3.57778	3.54837	3.60474	3.37954	3.4864532340900003	3.41253	3.79326	3.7965	3.8232309665800006
pos_1225	Melilotoside	草木樨苷	metab_1195	B(i)	87	0	Carbohydrates and derivatives	碳水化合物及其衍生物	Glycosides	糖苷类	C18	Primary metabolite	map01110;map00999	Biosynthesis of secondary metabolites;Biosynthesis of various plant secondary metabolites	HMDB0033581;HMDB0303353	M+H	C15H18O8	2.40853	次级代谢产物的生物合成;各种植物次生代谢产物的生物合成	C05158	pos	-	-	Metabolism;Metabolism	Global and overview maps;Biosynthesis of other secondary metabolites	Organic oxygen compounds	Organooxygen compounds	327.107	0.0007026087202389999	56.8	-0.505197	618-67-7	Carbohydrates and carbohydrate conjugates	3.13363	3.10225	3.10514	5.143531434040001	5.18023	5.19397	4.23187	4.19217	4.20453
pos_1245	N,n-Dimethylguanosine	N，N -二甲基鸟嘌呤核苷	metab_1215	B(i)	94.1	0	Others	其他类	Others	其他类	C18	Others	-	-	-	M+H	C12H17N5O5	2.43148	-	-	pos	-	-	-	-	-	-	312.13012475799997	0.00133100919243	57.8	-0.386797	-	-	4.06138	4.05442	4.06458	4.05626	4.04347	4.02145	4.14758	4.16397	4.15118
pos_1249	Pre-putrebactin	-	metab_1219	B(i)	79.3	0	Lipids	脂质	Fatty Acyls	脂肪酰类	C18	Primary metabolite	-	-	LMFA08020201	M+H	C16H30N4O7	2.43148	-	-	pos	-	-	-	-	-	-	391.219	0.00401799819071	54.9	-0.335186	-	-	4.170159954030002	4.1800901597400015	4.20487	4.29027	4.33862	4.308335885269998	4.23741	4.2054572534500005	4.24659
pos_1251	O-Ethyl-4-[(2',3',4'-tri-O-acetyl-alpha-L-rhamnosyloxy)benzyl]carbamate	O-乙基-4-[（2'，3'，4'-三-O-乙酰基-α-L-鼠李糖基氧基）苄基]氨基甲酸酯	metab_1221	B(ii)	0	62.8	Carbohydrates and derivatives	碳水化合物及其衍生物	Glycosides	糖苷类	C18	Primary metabolite	-	-	HMDB0031949	M+H	C22H29NO10	2.43148	-	-	pos	-	-	-	-	Organic oxygen compounds	Organooxygen compounds	468.187	0.0041560362483000005	52.2	0.305049334221413	159733-93-4	Carbohydrates and carbohydrate conjugates	2.08424	0.6227813368249999	2.4766654527900003	0.704602	2.34742	2.09374	2.35844	2.3857	2.40646
pos_1264	Neopterin	新蝶呤	metab_1232	B(ii)	0	49	Others	其他类	Pteridines and derivatives	蝶啶及其衍生物	C18	Others	map00790	Folate biosynthesis	HMDB0000845	M+H	C9H11N5O4	2.45442	叶酸生物合成	C05926	pos	-	-	Metabolism	Metabolism of cofactors and vitamins	Organoheterocyclic compounds	Pteridines and derivatives	254.087	0.0035962705758899997	47.3	-5.88315	2009-64-5	Pterins and derivatives	3.94655	3.94565	3.964691943480001	4.3992	4.38893	4.41998	4.286570468530002	4.30875	4.30917
pos_1265	Ser-Ile-Ala	-	metab_1233	B(i)	80.1	0	Others	其他类	Others	其他类	C18	Others	-	-	-	M+H	C12H23N3O5	2.45442	-	-	pos	-	-	-	-	-	-	290.171	0.00236210985002	55.1	-0.360078	-	-	3.94776	3.92357	3.97197	4.01839	4.07052	4.05293	4.17487	4.159477678430002	4.19434
pos_1269	Peonidin-3,5-O-di-beta-glucopyranoside	芍药花青素- 3，5 - O - Di - Beta -吡喃葡萄糖苷	metab_1237	B(i)	98.3	0	Flavonoids	类黄酮	Anthocyanidin	花青素	C18	Secondary metabolite	-	-	-	M+	C28H33O16+	2.45442	-	-	pos	-	-	-	-	-	-	625.176	0.00189725776377	59	-0.65129	-	-	3.51317	3.31092	3.44721	3.2010520867900003	3.2283	3.14596	4.33722	4.27777	4.29964
pos_1272	Acetophenone	苯乙酮	metab_1240	B(i)	76.3	0	Others	其他类	Ketones and derivatives	酮类及其衍生物	C18	Others	-	-	HMDB0033910	M+H	C8H8O	2.4772	-	C07113	pos	-	-	-	-	Organic oxygen compounds	Organooxygen compounds	121.06499734200001	0.00150675932613	54.6	1.7161226901315	98-86-2	Carbonyl compounds	3.77322	3.76964	3.7794	3.88385	3.8518	3.8979627947800006	3.89798	3.88078	3.89515
pos_1276	2-Hydroxyadipate	-	metab_1244	B(i)	73	0	Lipids	脂质	Fatty Acyls	脂肪酰类	C18	Primary metabolite	-	-	HMDB0000321	M+H	C6H10O5	2.4772	-	C02360	pos	-	-	-	-	Lipids and lipid-like molecules	Fatty Acyls	163.06	0.006512187451010001	54	0.0112182205192042	-	Fatty acids and conjugates	3.4316902184099995	3.5101	3.51457	3.76242	3.77624	3.79626	3.58311	3.48786	3.51398
pos_1282	Trioxsalen	三甲呋豆素	metab_1250	B(i)	55	0	Coumarins and derivatives	香豆素类及其衍生物	Coumarins and derivatives	香豆素类及其衍生物	C18	Secondary metabolite	-	-	HMDB0015575	M+H	C14H12O3	2.4772	-	C09314	pos	-	-	-	-	Phenylpropanoids and polyketides	Coumarins and derivatives	229.08588456200002	0.010815598921999998	50.2	-0.158339	3902-71-4	Furanocoumarins	3.2798221244300003	2.73582	3.17552	3.4673314580900003	3.4928875822900003	3.4616693036000004	3.09128	3.0819780967400003	3.072
pos_1285	Ala-Ile-Ala	-	metab_1253	B(i)	93.3	0	Others	其他类	Others	其他类	C18	Others	-	-	-	M+H	C12H23N3O4	2.4772	-	-	pos	-	-	-	-	-	-	274.176	0.000842610289712	57.9	-0.302258	-	-	4.42559	4.43752	4.42143	4.49643	4.49761	4.49404	4.6858	4.67364	4.69678
pos_1300	4-hydroxybenzoic acid	-	metab_1268	B(i)	88.9	0	Phenolic acids and derivatives	酚酸类及其衍生物	Benzoic acids and derivatives	苯甲酸及其衍生物	C18	Secondary metabolite	map01100;map00130;map01110;map00790;map01240	Metabolic pathways;Ubiquinone and other terpenoid-quinone biosynthesis;Biosynthesis of secondary metabolites;Folate biosynthesis;Biosynthesis of cofactors	HMDB0000500;PW_C000382	M+H	C7H6O3	2.4992166666699998	代谢途径;泛醌和其他萜类醌生物合成;次级代谢产物的生物合成;叶酸生物合成;辅助因子的生物合成	C00156	pos	-	-	Metabolism;Metabolism;Metabolism;Metabolism;Metabolism	Global and overview maps;Metabolism of cofactors and vitamins;Global and overview maps;Metabolism of cofactors and vitamins;Global and overview maps	Benzenoids	Benzene and substituted derivatives	139.039	0.0038404620955000005	57.4	0.23153189296694196	99-96-7	Benzoic acids and derivatives	3.44725	3.46076	3.48252	4.467817452709999	4.4682	4.51161	3.53737	3.52318	3.54089
pos_1306	Gamma-Glutamyltyramine	-	metab_1274	B(i)	97.7	0	Amino acids and derivatives	氨基酸及其衍生物	Glutamine and derivatives	谷氨酰胺及其衍生物	C18	Primary metabolite	map01100;map01240	Metabolic pathways;Biosynthesis of cofactors	-	M+H	C13H18N2O4	2.4992166666699998	代谢途径;辅助因子的生物合成	C20926	pos	-	-	Metabolism;Metabolism	Global and overview maps;Global and overview maps	-	-	267.13371144900003	0.00219945611706	58.7	-0.83437	-	-	2.44888	2.52982	2.17519	3.61758	3.5308844016400003	3.56337	3.96786	3.92838	3.95269
pos_1307	Pro-Tyr	-	metab_1275	B(i)	80.4	0	Amino acids and derivatives	氨基酸及其衍生物	Dipeptides	二肽	C18	Primary metabolite	-	-	HMDB0029029	M+H	C14H18N2O4	2.4992166666699998	-	-	pos	-	-	-	-	Organic acids and derivatives	Carboxylic acids and derivatives	279.134	0.0017127993924899998	55.3	0.13838862854960501	-	Amino acids, peptides, and analogues	4.0382987571300015	4.01166	4.04296	4.03571	4.02768	4.04562	4.22986	4.23383	4.25206
pos_1314	Ile-Val-Glu	-	metab_1282	B(i)	72	0	Others	其他类	Others	其他类	C18	Others	-	-	-	M+H	C16H29N3O6	2.4992166666699998	-	-	pos	-	-	-	-	-	-	360.213	0.00238944380989	52.9	-0.449142	-	-	3.90369	3.92218	3.95929	3.91954	3.95583	3.9599700266800006	4.35842	4.33136	4.34085
pos_1316	3-O-Caffeoyl-1-O-methylquinic acid	3 - O -咖啡酰基- 1 - O -甲基奎宁酸	metab_1284	B(ii)	0	51	Phenolic acids and derivatives	酚酸类及其衍生物	Quinic acids and derivatives	奎宁酸及其衍生物	C18	Secondary metabolite	-	-	HMDB0039959	M+ACN+H	C17H20O9	2.4992166666699998	-	-	pos	-	-	-	-	Organic oxygen compounds	Organooxygen compounds	410.145	0.008356024384850001	49.7	0.0503238143892928	-	Alcohols and polyols	2.6952797044200003	2.75521	2.72194	2.6998	2.52098	2.58573	2.58266	2.27504	2.76162
pos_1326	L-2-amino-8-oxodecanoate	-	metab_1292	B(i)	51.6	0	Amino acids and derivatives	氨基酸及其衍生物	Alpha amino acids and derivatives	Alpha氨基酸及其衍生物	C18	Primary metabolite	-	-	-	M+H	C10H19NO3	2.52135	-	-	pos	-	-	-	-	-	-	202.144	0.0026041844288699997	48.7	0.15269662910425302	-	-	3.24902	3.31147	3.2990595536900003	3.16666	3.0735540023000003	3.20011	2.68747	2.10269	2.58065
pos_1329	6b-Hydroxy-8a-methoxy-7(11)-eremophilen-12,8-olide	6b-羟基-8a-甲氧基-7（11）-eremophilen-12,8-内酯	metab_1295	B(ii)	0	60.6	Others	其他类	Others	其他类	C18	Others	-	-	HMDB0036979	M+NH4	C16H24O4	2.52135	-	-	pos	-	-	-	-	Lipids and lipid-like molecules	Prenol lipids	298.201	0.0018934167017	51.5	-0.333089	58848-45-6	Terpene lactones	1.7946595450599998	1.79906	1.80836	1.90214	1.89034	1.89674	1.8952272801400003	1.89904	1.89255
pos_1332	Leu-Glu-Ala	-	metab_1298	B(i)	84	0	Others	其他类	Others	其他类	C18	Others	-	-	-	M+H	C14H25N3O6	2.52135	-	-	pos	-	-	-	-	-	-	332.181	0.00312144927065	55.9	-1.21639	-	-	4.097	4.06035	4.05839	4.0603711349400005	4.11368	4.10698	4.36865	4.33681	4.31156
pos_1346	3-Methoxy-4-hydroxyphenylacetaldehyde	-	metab_1312	B(i)	66	0	Others	其他类	Others	其他类	C18	Others	map01100;map00350	Metabolic pathways;Tyrosine metabolism	HMDB0005175	M+H	C9H10O3	2.5442	代谢途径;酪氨酸代谢	C05581	pos	-	-	Metabolism;Metabolism	Global and overview maps;Amino acid metabolism	Benzenoids	Phenols	167.07	0.00046554432272800006	52.9	0.16977669367350698	5703-24-2	Methoxyphenols	3.7167822885300006	3.72186	3.73865	4.96335	4.95898	4.99091	4.03226	3.99918	4.03106
pos_1352	Asp-Leu	-	metab_1318	B(i)	92.5	0	Others	其他类	Others	其他类	C18	Others	-	-	HMDB0028757	M+H	C10H18N2O5	2.5442	-	-	pos	-	-	-	-	Organic acids and derivatives	Carboxylic acids and derivatives	247.12872192400002	0.00080824990966	56	-0.512727	-	Amino acids, peptides, and analogues	4.520636296919999	4.52916	4.53214	4.63563	4.65405	4.65832	4.66009	4.64283	4.64734
pos_1357	Ilicifolinoside A	-	metab_1323	B(ii)	0	40.2	Lipids	脂质	Fatty Acyls	脂肪酰类	C18	Primary metabolite	-	-	HMDB0041186	M+CH3OH+Na	C11H20O7	2.5442	-	-	pos	-	-	-	-	Lipids and lipid-like molecules	Fatty Acyls	319.139	0.00216101963354	45.7	8.3830493477189	-	Fatty acyl glycosides	2.46376	2.5704594217500003	2.34457	2.29581	1.81725	2.1967	1.73657	2.38869	2.3449
pos_1393	2-Indanone	-	metab_1357	B(i)	86.5	0	Others	其他类	Others	其他类	C18	Others	-	-	-	M+H	C9H8O	2.59007	-	C07727	pos	-	-	-	-	-	-	133.065	0.000605211601334	56.2	0.701367766943934	615-13-4	-	2.9227	2.90501	2.91776	3.86811	3.869635631640001	3.8764	3.67248	3.63716	3.67573
pos_1414	Quercetin-3'-glucuronide	槲皮素- 3 ' -葡萄糖醛酸苷	metab_1377	B(ii)	0	65.7	Flavonoids	类黄酮	Flavonoid glycosides	黄酮糖苷	C18	Secondary metabolite	-	-	HMDB0029213	M+CH3OH+Na	C21H20O13	2.59007	-	-	pos	-	-	-	-	Organic acids and derivatives	Carboxylic acids and derivatives	535.106	0.00476481609645	52.8	0.501321130174282	-	Amino acids, peptides, and analogues	2.03154	2.03597	2.04533	2.13967	2.1278077096400003	2.1342401804900004	3.4104542920300003	3.45074	3.45423
pos_1419	2,6-Dimethoxyphenol	2,6-二甲氧基酚	metab_1382	B(i)	50.7	0	Others	其他类	Others	其他类	C18	Others	-	-	HMDB0034158	M+H	C8H10O3	2.61295	-	C10787	pos	-	-	-	-	Benzenoids	Phenols	155.07027479200002	0.00558502684491	49.7	0.0271363272411024	1991/10/1;91-10-1	Methoxyphenols	3.45632	3.43988	3.4441586897000005	3.72798	3.72393	3.72989	3.62333	3.62533	3.5872900174800004
pos_1420	Stipitaldehyde	-	metab_1383	B(i)	58.3	0	Others	其他类	Others	其他类	C18	Others	-	-	-	M+H	C9H8O4	2.61295	-	-	pos	-	-	-	-	-	-	181.04956251099998	0.00398065680169	51.1	0.151875741494525	-	-	3.05796	3.07375	3.09602	3.3844502693700003	3.31811	3.2986	3.1317191384900003	3.11688	3.09774
pos_1421	Syringic acid	丁香酸	metab_1384	B(i)	96.1	0	Phenolic acids and derivatives	酚酸类及其衍生物	Benzoic acids and derivatives	苯甲酸及其衍生物	C18	Secondary metabolite	-	-	HMDB0002085	M+H	C9H10O5	2.61295	-	C10833	pos	-	-	-	-	Benzenoids	Benzene and substituted derivatives	199.06	0.0007764340265599999	58.9	0.458978917480945	530-57-4	Benzoic acids and derivatives	3.823121162190001	3.81316	3.80192	4.33108	4.33467	4.3383778683599985	4.02869	3.99347	4.01534
pos_1443	Valerianine	-	metab_1406	B(i)	85.7	0	Others	其他类	Pyridines and derivatives	吡啶及其衍生物	C18	Others	-	-	HMDB0033484	M+H	C11H15NO	2.63577	-	C09991	pos	-	-	-	-	Organoheterocyclic compounds	Pyridines and derivatives	178.12269907099997	0.0027960900608099996	56.6	0.33048538974262	30634-66-3	Not Available	3.27667	3.26568	3.24302	3.14212	3.13311	3.15126	3.16226	3.17761	3.13906
pos_1444	Phenacetin	非那西汀	metab_1407	B(ii)	0	50.4	Others	其他类	Others	其他类	C18	Others	-	-	HMDB0256387	M+H	C10H13NO2	2.63577	-	C07591	pos	-	-	-	-	Benzenoids	Benzene and substituted derivatives	180.10191836599998	0.005105178258689999	49.3	0.0741138481521427	62-44-2	Anilides	3.3176170609900004	3.23361	3.24621	3.1886018846900006	3.2238844289599995	3.21118	3.27014	3.30171	3.18069
pos_1451	Heliotrine	天芥菜碱	metab_1414	B(i)	43.8	0	Others	其他类	Others	其他类	C18	Others	-	-	HMDB0253072	M+H	C16H27NO5	2.63577	-	C10324	pos	-	-	-	-	Alkaloids and derivatives	Not Available	314.196	0.0169756978003	48.1	0.119546596900916	303-33-3	Not Available	1.82566	1.18496	1.61918	0.903294	1.8673956648400003	0.74973	1.85003	0.982383	0.918788
pos_1466	Val-Ile-Glu	-	metab_1429	B(i)	74	0	Amino acids and derivatives	氨基酸及其衍生物	Other peptides	其他肽	C18	Primary metabolite	-	-	-	M+H	C16H29N3O6	2.65857	-	-	pos	-	-	-	-	-	-	360.213	0.004933709831439999	52.6	-0.182487	-	-	4.17033	4.20332	4.1665	4.19788	4.20864	4.20349	4.25622	4.23969	4.26653
pos_1480	Betaine	甜菜碱	metab_1443	B(ii)	0	52.8	Amino acids and derivatives	氨基酸及其衍生物	Alpha amino acids and derivatives	Alpha氨基酸及其衍生物	C18	Primary metabolite	map01100;map02010;map00260	Metabolic pathways;ABC transporters;Glycine, serine and threonine metabolism	HMDB0000043	M+K	C5H12NO2+	2.68145	代谢途径;ABC转运器;甘氨酸、丝氨酸和苏氨酸代谢	C00719	pos	-	-	Metabolism;Environmental Information Processing;Metabolism	Global and overview maps;Membrane transport;Amino acid metabolism	Organic acids and derivatives	Carboxylic acids and derivatives	157.05	0.005577468720250001	49.6	-2.99579	107-43-7;6915-17-9	Amino acids, peptides, and analogues	2.90964	2.91157	2.89591	2.88102	2.84977	2.8776575390400003	2.90855	2.7908703465400007	2.81262
pos_1489	Furocoumarinic acid glucoside	呋喃香豆酸葡萄糖苷	metab_1452	B(ii)	0	67	Carbohydrates and derivatives	碳水化合物及其衍生物	Glycosides	糖苷类	C18	Primary metabolite	-	-	HMDB0029601	M+ACN+H	C17H18O9	2.68145	-	-	pos	-	-	-	-	Organic oxygen compounds	Organooxygen compounds	408.12904600900004	0.00465836537929	53	0.377839737977461	-	Carbohydrates and carbohydrate conjugates	1.49171	1.47521	0.17391	0.7673260813130001	0.626341	1.49048	1.83114	1.13303	1.3759331971000002
pos_1500	Hydroxytyrosol	羟基酪醇	metab_1463	B(i)	80.5	0	Others	其他类	Others	其他类	C18	Others	-	-	HMDB0005784	M+H-2H2O	C8H10O3	2.70447	-	-	pos	-	-	-	-	Benzenoids	Phenols	119.049	0.00164192437097	55.2	1.35898832344412	10597-60-1	Tyrosols and derivatives	2.8980540956200005	2.90277	2.93541	3.82769	3.82753	3.84624	3.27842	3.18555	3.22115
pos_1501	Phenylpyruvic acid	苯丙酮酸	metab_1464	B(ii)	0	78.4	Organic acids and derivatives	有机酸及其衍生物	Organic acids and derivatives	有机酸及其衍生物	C18	Secondary metabolite	map01100;map01110;map01210;map00960;map00470;map01230;map00360;map00400	Metabolic pathways;Biosynthesis of secondary metabolites;2-Oxocarboxylic acid metabolism;Tropane, piperidine and pyridine alkaloid biosynthesis;D-Amino acid metabolism;Biosynthesis of amino acids;Phenylalanine metabolism;Phenylalanine, tyrosine and tryptophan biosynthesis	HMDB0000205	M+H	C9H8O3	2.70447	代谢途径;次级代谢产物的生物合成;2-氧代羧酸代谢;莨菪烷、哌啶和吡啶生物碱的生物合成;D-氨基酸代谢;氨基酸生物合成;苯丙氨酸代谢;苯丙氨酸、酪氨酸和色氨酸生物合成	C00166	pos	-	-	Metabolism;Metabolism;Metabolism;Metabolism;Metabolism;Metabolism;Metabolism;Metabolism	Global and overview maps;Global and overview maps;Global and overview maps;Biosynthesis of other secondary metabolites;Metabolism of other amino acids;Global and overview maps;Amino acid metabolism;Amino acid metabolism	Benzenoids	Benzene and substituted derivatives	165.055	0.000697854139537	54.5	0.54328739898836	156-06-9	Phenylpyruvic acid derivatives	4.16114	4.15666	4.14487	4.88726	4.88962	4.90619	4.38833	4.40188	4.3516966677900015
pos_1504	Anserine	鹅肌肽	metab_1467	B(ii)	0	55.3	Organic acids and derivatives	有机酸及其衍生物	Organic acids and derivatives	有机酸及其衍生物	C18	Secondary metabolite	map01100;map00340;map00410	Metabolic pathways;Histidine metabolism;beta-Alanine metabolism	HMDB0000194	M+	C10H16N4O3	2.70447	代谢途径;组氨酸代谢;β-丙氨酸代谢	C01262	pos	Peptides	Peptides	Metabolism;Metabolism;Metabolism	Global and overview maps;Amino acid metabolism;Metabolism of other amino acids	Organic acids and derivatives	Peptidomimetics	240.123	0.00126983542224	49.9	3.03420233071872	584-85-0	Hybrid peptides	4.01295	4.00685	3.99434	3.80923	3.84641	3.82962	3.55653	3.52918	3.55107
pos_1507	Sucrose	蔗糖	metab_1470	B(i)	89.8	0	Carbohydrates and derivatives	碳水化合物及其衍生物	O-glycosyl compounds	O-糖基化合物	C18	Primary metabolite	map01100;map00500;map01110;map02010;map00052	Metabolic pathways;Starch and sucrose metabolism;Biosynthesis of secondary metabolites;ABC transporters;Galactose metabolism	HMDB0000258;PW_C000177	M+H-H2O	C12H22O11	2.70447	代谢途径;淀粉和蔗糖代谢;次级代谢产物的生物合成;ABC转运器;半乳糖代谢	C00089	pos	Carbohydrates	Oligosaccharides	Metabolism;Metabolism;Metabolism;Environmental Information Processing;Metabolism	Global and overview maps;Carbohydrate metabolism;Global and overview maps;Membrane transport;Carbohydrate metabolism	Organic oxygen compounds	Organooxygen compounds	325.113	0.0011718237689	57.1	-0.444822	57-50-1	Carbohydrates and carbohydrate conjugates	3.2825	3.27289	3.3552	4.40286	4.41783	4.45557	3.73754	3.78975	3.70933
pos_1510	Tyr-Tyr	-	metab_1473	B(i)	35.8	0	Amino acids and derivatives	氨基酸及其衍生物	Other peptides	其他肽	C18	Primary metabolite	-	-	HMDB0029117	M+	C18H20N2O5	2.70447	-	-	pos	-	-	-	-	Organic acids and derivatives	Carboxylic acids and derivatives	344.13387074199994	0.0035994002188700002	44.1	-9.76647	-	Amino acids, peptides, and analogues	4.00093	3.86374	3.971646771130001	4.5371	4.541542495940001	4.576	4.1242305885500015	4.10401	3.95528
pos_1522	4-methylpentanoic acid	-	metab_1485	B(i)	50.2	0	Lipids	脂质	Fatty Acyls	脂肪酰类	C18	Primary metabolite	-	-	HMDB0000689	M+H	C6H12O2	2.7273	-	-	pos	-	-	-	-	Lipids and lipid-like molecules	Fatty Acyls	117.091	0.0016696420115199998	49.2	1.94785626405159	646-07-1	Fatty acids and conjugates	3.79823	3.80501	3.78628	3.76851	3.77091	3.78327	3.78953	3.7909	3.71133
pos_1524	7-Hydroxychromone	-	metab_1487	B(i)	77.2	0	Others	其他类	Benzopyrans	苯骈吡喃类	C18	Others	-	-	-	M+H	C9H6O3	2.7273	-	-	pos	-	-	-	-	-	-	163.039	0.00468781061635	54.8	-0.325465	-	-	4.29767	4.29248	4.24128	4.515640372869999	4.47047	4.53934	4.39088	4.4149	4.30144
pos_1527	Scoparone	滨蒿内酯	metab_1490	B(i)	93.1	0	Coumarins and derivatives	香豆素类及其衍生物	Coumarins and derivatives	香豆素类及其衍生物	C18	Secondary metabolite	map00999	Biosynthesis of various plant secondary metabolites	HMDB0030818	M+H	C11H10O4	2.7273	各种植物次生代谢产物的生物合成	C09311	pos	-	-	Metabolism	Biosynthesis of other secondary metabolites	Phenylpropanoids and polyketides	Coumarins and derivatives	207.065	0.00324939660823	58.2	0.149093840300545	120-08-1	Not Available	2.93769	2.7829	2.88046	4.43993	4.446199468180001	4.45649	3.49562	3.45363	3.38766
pos_1530	3-Hydroxyhexobarbital	-	metab_1493	B(i)	97	0	Others	其他类	Diazines	二氮杂苯	C18	Others	-	-	-	M+H	C12H16N2O4	2.7273	-	C03068	pos	-	-	-	-	-	-	253.11819915900003	0.0009476730825	59	-0.334274	-	-	4.58858	4.56542	4.56856	4.663	4.660288331449999	4.66405	4.63807	4.61508	4.61264
pos_1531	1,2:3,4-di-O-Isopropylidene-D-galactopyranose	-	metab_1494	B(i)	36.3	0	Others	其他类	Others	其他类	C18	Others	-	-	-	M+Na	C12H20O6	2.7273	-	-	pos	-	-	-	-	-	-	283.118	0.0026955970224200004	44.7	9.23838811983521	-	-	2.17803	1.24185	1.26088	2.0756	1.92051	2.28968	2.0580004347400003	2.14544	2.18065
pos_1562	Isovanillic acid	异香草酸	metab_1525	B(i)	74.7	0	Phenolic acids and derivatives	酚酸类及其衍生物	Benzoic acids and derivatives	苯甲酸及其衍生物	C18	Secondary metabolite	-	-	HMDB0060003	M+H	C8H8O4	2.75032	-	-	pos	-	-	-	-	Benzenoids	Benzene and substituted derivatives	169.05	0.00197799402489	54.3	-0.0983352	-	Benzoic acids and derivatives	3.24932	3.2443	3.2181	3.74476	3.72662	3.78105	3.38466	3.3708	3.35423
pos_1570	Phe-Asn	-	metab_1533	B(i)	90.1	0	Amino acids and derivatives	氨基酸及其衍生物	Dipeptides	二肽	C18	Primary metabolite	-	-	HMDB0028990	M+H	C13H17N3O4	2.75032	-	-	pos	-	-	-	-	Organic acids and derivatives	Carboxylic acids and derivatives	280.129	0.0022419761479600003	57.3	-0.113069	39537-20-7	Amino acids, peptides, and analogues	4.17992	4.144327284080002	4.128626755369999	4.1157	4.15843	4.159312761680002	4.17884	4.17678	4.18314
pos_1571	N6,N6-Dimethyladenosine	-	metab_1534	B(i)	84.3	0	Nucleotides and derivatives	核苷酸及其衍生物	Nucleotides and derivatives	核苷酸及其衍生物	C18	Primary metabolite	-	-	-	M+H	C12H17N5O4	2.75032	-	C03416	pos	-	-	-	-	-	-	296.13531231400003	0.00103428364883	55.8	-0.0615519	2620-62-4	-	3.5847544093800003	3.53767	3.5821405467400003	3.68137	3.66506	3.66535	3.65609	3.63213	3.58581
pos_1573	Cichoriin	菊苣苷	metab_1536	B(ii)	0	63.6	Coumarins and derivatives	香豆素类及其衍生物	Coumarins and derivatives	香豆素类及其衍生物	C18	Secondary metabolite	-	-	HMDB0030821	M+H	C15H16O9	2.75032	-	C09206	pos	-	-	-	-	Phenylpropanoids and polyketides	Coumarins and derivatives	341.087	0.00292768214213	51.9	-0.175443	531-58-8	Coumarin glycosides	2.62455	2.57643	2.54084	3.6021083016000004	3.6541	3.60259	2.0708876966900003	2.13939	2.40947
pos_1592	3-Hydroxyindolin-2-one	-	metab_1555	B(i)	94.4	0	Indoles and derivatives	吲哚及其衍生物	Indoles and derivatives	吲哚及其衍生物	C18	Secondary metabolite	map00402;map01100;map01110;map00999	Benzoxazinoid biosynthesis;Metabolic pathways;Biosynthesis of secondary metabolites;Biosynthesis of various plant secondary metabolites	HMDB0240741	M+H	C8H7NO2	2.7734	苯并恶唑嗪酮类生物合成;代谢途径;次级代谢产物的生物合成;各种植物次生代谢产物的生物合成	C11130	pos	-	-	Metabolism;Metabolism;Metabolism;Metabolism	Biosynthesis of other secondary metabolites;Global and overview maps;Global and overview maps;Biosynthesis of other secondary metabolites	Organoheterocyclic compounds	Indoles and derivatives	150.055	0.0019231367225000001	58.1	0.546520445149281	61-71-2	Indolines	4.24799	4.23223	4.23042	3.63105	3.62998	3.64339	3.08225	3.16601	2.99364
pos_1600	(7'R,8'R)-4,7'-Epoxy-3'-methoxy-4',5,9,9'-lignanetetrol 9'-glucoside	（7'R，8'R）-4,7'-环氧-3'-甲氧基-4'，5,9,9'-木质素四醇9'-葡萄糖苷	metab_1563	B(ii)	0	49.8	Flavonoids	类黄酮	Benzofuran flavonoids	苯骈呋喃酮类	C18	Secondary metabolite	-	-	HMDB0038710	M+NH4	C25H32O11	2.7734	-	-	pos	-	-	-	-	Phenylpropanoids and polyketides	2-arylbenzofuran flavonoids	526.229	0.00554341123517	49.3	0.516060987653382	-	Not Available	1.97291	1.5339	1.5430737665399998	1.63573	1.6240640068099998	1.63039	1.7687972663099998	1.63267	1.92317
pos_1606	Melazolide A	-	metab_1567	B(i)	69	0	Others	其他类	Others	其他类	C18	Others	-	-	-	M+H	C11H16O4	2.79595	-	-	pos	-	-	-	-	-	-	213.112	0.0032932415336	52.7	-0.0585613	-	-	2.65832	2.53842	2.58729	2.5592487685900003	2.6691	2.7308972323400003	2.89388	2.42672	2.7257548827900004
pos_1628	Quinoline	喹啉	metab_1589	B(i)	52.8	0	Others	其他类	Quinolines and derivatives	喹啉及其衍生物	C18	Others	-	-	HMDB0033731	M+H	C9H7N	2.81788	-	C06413	pos	-	-	-	-	Organoheterocyclic compounds	Quinolines and derivatives	130.065	0.00219261971583	49.8	1.0342212425655501	91-22-5	Not Available	4.04077	4.0471	3.98044	3.81913	3.7807144029300006	3.88802	3.79293	3.81666	3.72365
pos_1630	Indole-3-carboxaldehyde	吲哚-3-甲醛	metab_1591	B(i)	95.3	0	Indoles and derivatives	吲哚及其衍生物	Indoles and derivatives	吲哚及其衍生物	C18	Secondary metabolite	-	-	HMDB0029737	M+H	C9H7NO	2.81788	-	C08493	pos	-	-	-	-	Organoheterocyclic compounds	Indoles and derivatives	146.06	0.000354506292492	57.1	-0.0657081	487-89-8	Indoles	4.5258	4.50017	4.49318	4.32013	4.30685	4.33426	4.37974	4.35587	4.37503
pos_1653	Ile-Val-Val	-	metab_1613	B(ii)	0	49.9	Others	其他类	Others	其他类	C18	Others	-	-	HMDB0304801	M+Na	C16H31N3O4	2.8401	-	-	pos	-	-	-	-	Organic acids and derivatives	Carboxylic acids and derivatives	352.223	0.00345925270021	47.9	6.50764999859344	-	Amino acids, peptides, and analogues	2.23644	2.06174	2.48357	4.09237	4.09478	4.1079828774400005	4.33984	4.2775	4.32487
pos_1661	4-ethynylaniline	-	metab_1620	B(i)	74.1	0	Others	其他类	Others	其他类	C18	Others	-	-	-	M+H	C8H7N	2.8618	-	-	pos	-	-	-	-	-	-	118.065	0.000717602414837	54.4	1.38346322379085	-	-	4.71676	4.712028233490001	4.70913	4.71944	4.696484029790001	4.71161	4.76544	4.74844	4.73033
pos_1673	2-O-beta-D-Glucopyranuronosyl-D-mannose	2 - O - β - D -葡萄糖醛酸基- D -甘露糖	metab_1631	B(ii)	0	56.6	Carbohydrates and derivatives	碳水化合物及其衍生物	Glucuronides	葡萄糖苷酸类	C18	Primary metabolite	-	-	HMDB0039722	M+	C12H20O12	2.8618	-	-	pos	-	-	-	-	Organic oxygen compounds	Organooxygen compounds	356.098	0.00613130114085	48.8	6.48074654422528	4539-91-7	Carbohydrates and carbohydrate conjugates	1.36407	1.36835	1.37739	1.4689055167200002	1.45737	1.4636262077700002	1.46215	1.46588	1.45953
pos_1674	Gln-Glu-Leu	-	metab_1632	B(i)	87.9	0	Others	其他类	Others	其他类	C18	Others	-	-	-	M+H	C16H28N4O7	2.8618	-	-	pos	-	-	-	-	-	-	389.203	0.0026325303747500002	56.5	-0.346496	-	-	4.31269	4.20957	4.2473	4.173795471569998	4.11281	4.1202	4.2952114774900005	4.19622	4.24139
pos_1675	(R)-2-Hydroxy-7,8-dimethoxy-2H-1,4-benzoxazin-3(4H)-one 2-glucoside	（R） -2-羟基-7,8-二甲氧基-2H-1,4-苯并恶嗪-3（4H）-酮2-葡萄糖苷	metab_1633	B(ii)	0	50.7	Carbohydrates and derivatives	碳水化合物及其衍生物	O-glycosyl compounds	O-糖基化合物	C18	Primary metabolite	-	-	HMDB0037262	M+Na	C16H21NO10	2.8618	-	-	pos	-	-	-	-	Organic oxygen compounds	Organooxygen compounds	410.10786222400003	0.00633613500276	47.7	5.41353827732239	40246-09-1	Carbohydrates and carbohydrate conjugates	2.87638	2.8808491861500003	2.89028	2.98528	2.9733459265499995	2.97982	2.9782896942900003	2.98215	2.97558
pos_1684	Suberic acid	辛二酸	metab_1642	B(i)	67.5	0	Lipids	脂质	Fatty Acyls	脂肪酰类	C18	Primary metabolite	-	-	HMDB0000893;LMFA01170001	M+H	C8H14O4	2.88228	-	C08278	pos	Organic acids	Carboxylic acids	-	-	Lipids and lipid-like molecules	Fatty Acyls	175.096	0.00471144015588	53.1	-0.210131	505-48-6	Fatty acids and conjugates	2.95136	2.89005	2.87238	2.85463	2.74932	2.64561	2.95243	2.70743	2.47514
pos_1687	Ala-Phe	-	metab_1645	B(i)	70.7	0	Amino acids and derivatives	氨基酸及其衍生物	Dipeptides	二肽	C18	Primary metabolite	-	-	HMDB0028694	M+H	C12H16N2O3	2.88228	-	-	pos	-	-	-	-	Organic acids and derivatives	Carboxylic acids and derivatives	237.12307616299998	0.00133783489233	53	-1.23943	3061-90-3	Amino acids, peptides, and analogues	4.37591	4.33981	4.32933	4.32186	4.3814995466500015	4.37333	4.52149	4.48081	4.49956
pos_1691	Ile-Leu-Ser	-	metab_1649	B(i)	80	0	Amino acids and derivatives	氨基酸及其衍生物	Other peptides	其他肽	C18	Primary metabolite	-	-	-	M+H	C15H29N3O5	2.88228	-	-	pos	-	-	-	-	-	-	332.218	0.00328903	54.7	-0.67996	-	-	4.50371	4.46708	4.46731	4.50286	4.52554	4.50952	4.57589	4.577466841880001	4.58445
pos_1693	4-(4-Fluorophenyl)-2-(4-nitrophenyl)-5-(4-pyridyl)-1H-imidazole	4-（4-氟苯基）-2-（4-硝基苯基）-5-（4-吡啶基）-1H咪唑	metab_1650	B(i)	89.7	0	Others	其他类	Azoles	唑类	C18	Others	-	-	HMDB0244687	M+H	C20H13FN4O2	2.88228	-	-	pos	-	-	-	-	Organoheterocyclic compounds	Azoles	361.11	0.0155254182048	55.2	1.92880989806876	-	Imidazoles	0.296444	0.0103209272075	0.0105450734721	0.0130882577625	0.0127382910008	0.18934	0.012882136298400002	0.012995544718799998	0.0128031
pos_1695	2,3-Butanediol apiosylglucoside	2，3 -丁二醇芹糖基葡萄糖苷	metab_1652	B(ii)	0	68.1	Carbohydrates and derivatives	碳水化合物及其衍生物	O-glycosyl compounds	O-糖基化合物	C18	Primary metabolite	-	-	HMDB0033063	M+ACN+Na	C15H28O11	2.88228	-	-	pos	-	-	-	-	Organic oxygen compounds	Organooxygen compounds	448.18103994300003	0.0023856626029299995	51.7	5.48842352145611	-	Carbohydrates and carbohydrate conjugates	4.04432	3.96582	3.92655	4.39757	4.33447	4.29668	4.4521547023800006	4.52526	4.42873
pos_1708	Thr-Phe	-	metab_1665	B(i)	79.4	0	Amino acids and derivatives	氨基酸及其衍生物	Dipeptides	二肽	C18	Primary metabolite	-	-	HMDB0029068	M+H	C13H18N2O4	2.90383	-	-	pos	-	-	-	-	Organic acids and derivatives	Carboxylic acids and derivatives	267.134	0.0018752882923599998	54.8	-1.11507	16875-27-7	Amino acids, peptides, and analogues	4.662076760290001	4.67408	4.64215	4.6146418781300005	4.63016	4.62687	4.69472	4.6866051978900005	4.6795
pos_1713	Patuletin 3-gentiobioside	藤菊黄素3 -龙胆二糖苷	metab_1670	B(ii)	0	75.5	Flavonoids	类黄酮	Flavonoid glycosides	黄酮糖苷	C18	Secondary metabolite	-	-	HMDB0037541	M+CH3OH+Na	C28H32O18	2.90383	-	-	pos	-	-	-	-	Phenylpropanoids and polyketides	Flavonoids	711.177	0.00471868685585	53.8	3.79208851131476	101021-28-7	Flavonoid glycosides	2.24786	2.25231	2.2617	2.35635	2.34445	2.3509033561400003	4.36498	4.34004	4.30405
pos_1751	Gibberellin A32	赤霉素A32	metab_1707	B(ii)	0	47.5	Terpenoids	萜类	Diterpenoids	二萜	C18	Secondary metabolite	-	-	HMDB0035037	M+NH4	C19H22O8	2.94887	-	-	pos	-	-	-	-	Lipids and lipid-like molecules	Prenol lipids	396.165	0.0078009928802	48.8	-0.27251	32165-30-3	Diterpenoids	2.40865	2.33517	2.46898	2.38376	2.6917398835000004	2.63647	2.75067	2.69864	2.41219
pos_1752	Folinic acid	亚叶酸	metab_1708	B(ii)	0	48.4	Amino acids and derivatives	氨基酸及其衍生物	Glutamic acid and derivatives	谷氨酸及其衍生物	C18	Primary metabolite	map01100;map00670	Metabolic pathways;One carbon pool by folate	HMDB0001562	M+H-2H2O	C20H23N7O7	2.94887	代谢途径;叶酸的一个碳库	C03479	pos	-	-	Metabolism;Metabolism	Global and overview maps;Metabolism of cofactors and vitamins	Organoheterocyclic compounds	Pteridines and derivatives	438.15408622300004	0.00363068038934	47.5	4.3178401088379905	1958/5/9;68538-85-2	Pterins and derivatives	3.97194	3.98573	3.95652	3.91488	3.91259	3.91467	3.51285	3.55067	3.53033
pos_1767	Homovanillic acid	高香草酸	metab_1723	B(i)	67.5	0	Others	其他类	Others	其他类	C18	Others	map01100;map00350	Metabolic pathways;Tyrosine metabolism	HMDB0000118;PW_C000074	M+H	C9H10O4	2.97187	代谢途径;酪氨酸代谢	C05582	pos	-	-	Metabolism;Metabolism	Global and overview maps;Amino acid metabolism	Benzenoids	Phenols	183.06533271400002	0.00480096274408	52.7	0.8100890765328901	306-08-1	Methoxyphenols	3.93393	3.92044	3.89555	3.76768	3.72348	3.73732	3.3287	3.32953	3.25954
pos_1768	2,4,8-Trihydroxy-1-tetralone	-	metab_1724	B(i)	96.9	0	Others	其他类	Others	其他类	C18	Others	-	-	-	M+H	C10H10O4	2.97187	-	C09974	pos	-	-	-	-	-	-	195.065	0.00265428632996	58.9	0.7111926372425079	88899-02-9	-	3.84733	3.90979	3.87071	5.142772749890001	5.12636	5.14958	4.14982	4.16802	4.09513
pos_1774	Aspartame	天冬甜精	metab_1730	B(i)	87.6	0	Amino acids and derivatives	氨基酸及其衍生物	Other peptides	其他肽	C18	Primary metabolite	-	-	HMDB0001894	M+H	C14H18N2O5	2.97187	-	C11045	pos	-	-	-	-	Organic acids and derivatives	Carboxylic acids and derivatives	295.129	0.0008012665765810001	56.9	0.10443430163229901	22839-47-0	Amino acids, peptides, and analogues	4.08461	4.05593	4.04653	4.12555	4.12486	4.11925	4.235322365319998	4.24252	4.21561
pos_1775	Galloyl glucose	-	metab_1731	B(ii)	0	55	Tannins	鞣质	Tannins	鞣质	C18	Secondary metabolite	map00999	Biosynthesis of various plant secondary metabolites	HMDB0301708	M+H-H2O	C13H16O10	2.97187	各种植物次生代谢产物的生物合成	C01158	pos	-	-	Metabolism	Biosynthesis of other secondary metabolites	Phenylpropanoids and polyketides	Tannins	315.07091411700003	0.0009399819399480001	50.1	-0.434667	-	Not Available	2.20823	2.1384536633099995	2.0253700607700003	2.1196732123599995	2.10782	2.11425	2.11273	2.11656	2.11004
pos_1786	Fraxin	白蜡树苷	metab_1742	B(ii)	0	67.6	Coumarins and derivatives	香豆素类及其衍生物	Coumarins and derivatives	香豆素类及其衍生物	C18	Secondary metabolite	-	-	HMDB0252486	M+CH3OH+Na	C16H18O10	2.97187	-	C09266	pos	-	-	-	-	Phenylpropanoids and polyketides	Coumarins and derivatives	425.108	0.0013441204071600002	51.6	5.85616262842063	524-30-1	Coumarin glycosides	2.8533735552900006	2.43701	2.61367	3.2441109149500003	3.39638	3.42588	3.06214	3.02903	2.75115
pos_1805	Gentisyl Alcohol	龙胆霉醇	metab_1760	B(i)	53.6	0	Others	其他类	Others	其他类	C18	Others	-	-	-	M+H	C7H8O3	2.99482	-	C10792	pos	-	-	-	-	-	-	141.055	0.0029914819314	50.1	0.491450269518724	495-08-9	-	2.95486	2.97531	2.90116	2.95896	2.94014	2.95972	2.9874	2.9684220219200004	2.87262
pos_1808	Apocynin	-	metab_1763	B(i)	79.3	0	Others	其他类	Ketones and derivatives	酮类及其衍生物	C18	Others	-	-	HMDB0247918	M+H	C9H10O3	2.99482	-	C11380	pos	-	-	-	-	Organic oxygen compounds	Organooxygen compounds	167.07	0.0028473669841900004	55.4	0.4608269155303039	498-02-2	Carbonyl compounds	3.95047	3.94947	3.93617	4.433621237980001	4.412000507719999	4.44237	4.12546	4.1133729615800005	4.07455
pos_1821	(1S,2S,4R)-p-Menth-8-ene-1,2,10-triol 2-glucoside	（1S，2S，4R）-p-薄荷-8-烯-1,2,10-三醇2-葡萄糖苷	metab_1776	B(ii)	0	64.2	Terpenoids	萜类	Other terpenoids	其他萜类	C18	Secondary metabolite	-	-	HMDB0039469	M+NH4	C16H28O8	2.99482	-	-	pos	-	-	-	-	Lipids and lipid-like molecules	Prenol lipids	366.212	0.0014452751978099997	51.9	0.13140277512244	378254-11-6	Terpene glycosides	3.83462	3.82229	3.74869	4.468310704059999	4.43545	4.44512	4.25271	4.28508	4.23819
pos_1822	Ile-Leu-Gln	-	metab_1777	B(i)	81.2	0	Others	其他类	Others	其他类	C18	Others	-	-	-	M+H	C17H32N4O5	2.99482	-	-	pos	-	-	-	-	-	-	373.245	0.00326905512584	55	0.304166770024914	-	-	3.85313	3.88768	3.8258309429300006	3.9522	3.97727	3.96773	4.11139	4.09206	4.0755711894300015
pos_1837	1beta-methylcarbapenem	-	metab_1792	B(i)	61.3	0	Others	其他类	Others	其他类	C18	Others	-	-	HMDB0244863	M+H	C7H9NO	3.01775	-	-	pos	-	-	-	-	Organoheterocyclic compounds	Lactams	124.07589070700001	0.00470345987854	50.9	1.6280567760730702	-	Beta lactams	3.0896177391400004	3.12725	3.09215	3.11234	3.04462	3.12463	3.13542	3.11479	3.0689706784900004
pos_1839	(6E)-8-Hydroxygeranial	-	metab_1794	B(i)	55.2	0	Terpenoids	萜类	Monoterpenoids	单萜	C18	Secondary metabolite	-	-	-	M+H	C10H16O2	3.01775	-	C20222	pos	-	-	-	-	-	-	169.122	0.00154106775875	50.7	0.11580219815436	-	-	4.2974504321300016	4.3069	4.27113	4.89652	4.871816291519999	4.88738	4.68035	4.70574	4.69614
pos_1865	Xanthatin	-	metab_1820	B(i)	70.8	0	Others	其他类	Others	其他类	C18	Others	-	-	-	M+H	C15H18O3	3.0408	-	C09601	pos	-	-	-	-	-	-	247.133	0.00415404892214	52.7	0.387938640764226	26791-73-1	-	3.72333	3.72357	3.68554	3.53889	3.51013	3.52326	3.57002	3.5856	3.55143
pos_1869	6-Tuliposide B	-	metab_1824	B(i)	62.1	0	Lipids	脂质	Saccharolipids	糖脂类	C18	Primary metabolite	-	-	-	M+H	C11H18O9	3.0408	-	C21186	pos	-	-	-	-	-	-	295.102	0.00706304058326	51.9	0.10502755550640801	-	-	1.10595	1.11007	1.1187878589799998	1.68084	1.44925	1.20223	1.20079	1.20441	1.19825
pos_1899	Zeatin	玉米素	metab_1854	B(i)	59.6	0	Others	其他类	Others	其他类	C18	Others	map01100;map01110;map04075;map00908	Metabolic pathways;Biosynthesis of secondary metabolites;Plant hormone signal transduction;Zeatin biosynthesis	HMDB0012204	M+H	C10H13N5O	3.06342	代谢途径;次级代谢产物的生物合成;植物激素信号转导;玉米素生物合成	C00371	pos	-	-	Metabolism;Metabolism;Environmental Information Processing;Metabolism	Global and overview maps;Global and overview maps;Signal transduction;Metabolism of terpenoids and polyketides	Organoheterocyclic compounds	Imidazopyrimidines	220.118	0.0200750675155	48.6	-6.23311	1637-39-4	Purines and purine derivatives	3.01915	3.0405905171900005	2.89163	3.03726	2.9612	2.9226388398500003	2.90821	2.8995651012700003	3.0598
pos_1901	Ile-Met	-	metab_1856	B(i)	71.3	0	Others	其他类	Others	其他类	C18	Others	-	-	HMDB0028913	M+H	C11H22N2O3S	3.06342	-	-	pos	-	-	-	-	Organic acids and derivatives	Carboxylic acids and derivatives	263.14089628799996	0.00236321636536	51.7	-5.69828	-	Amino acids, peptides, and analogues	4.46265	4.42104	4.41847	4.43407	4.47419	4.45108	4.66323	4.67265	4.69002
pos_1903	3-(5'-methylthio)pentylmalate	3-（5’-甲硫基）戊基苹果酸	metab_1858	B(ii)	0	41.9	Organic acids and derivatives	有机酸及其衍生物	Organic acids and derivatives	有机酸及其衍生物	C18	Secondary metabolite	map01210;map00966	2-Oxocarboxylic acid metabolism;Glucosinolate biosynthesis	HMDB0304110	M+ACN+Na	C10H16O5S-2	3.06342	2-氧代羧酸代谢;硫代葡萄糖苷生物合成	C17223	pos	-	-	Metabolism;Metabolism	Global and overview maps;Biosynthesis of other secondary metabolites	Organic acids and derivatives	Hydroxy acids and derivatives	312.087	0.0034220856701399995	45	-4.16817	-	Medium-chain hydroxy acids and derivatives	2.65573	2.73616	2.71365	3.14491	3.19273	3.14609	2.08194	2.08577	2.07925
pos_1924	Methyl indole-3-acetate	-	metab_1879	B(i)	48.6	0	Indoles and derivatives	吲哚及其衍生物	Indoles and derivatives	吲哚及其衍生物	C18	Secondary metabolite	-	-	HMDB0029738	M+H	C11H11NO2	3.08622	-	-	pos	-	-	-	-	Organoheterocyclic compounds	Indoles and derivatives	190.086	0.00641176128559	48.5	0.28041937604303097	1912-33-0	Indolyl carboxylic acids and derivatives	3.1859	3.22735	3.29321	3.41756	3.3700967852900003	3.39186	3.11053	3.1212	3.14127
pos_1930	Hibiscoquinone B	-	metab_1885	B(i)	67.7	0	Quinones	醌类	Naphthoquinones	萘醌	C18	Secondary metabolite	-	-	-	M+H	C14H14O4	3.08622	-	-	pos	-	-	-	-	-	-	247.09647373400003	0.005537920383500001	53	-0.0472398	-	-	2.07513	0.155522	1.92831	2.49831	2.26087	2.06269	1.82853	1.72928	2.27748
pos_1949	2'-Hydroxy-5'-methylacetophenone	2 ' -羟基- 5 ' -甲基苯乙酮	metab_1904	B(i)	60.2	0	Others	其他类	Ketones and derivatives	酮类及其衍生物	C18	Others	-	-	HMDB0032592	M+H	C9H10O2	3.10923	-	-	pos	-	-	-	-	Organic oxygen compounds	Organooxygen compounds	151.07542163600002	0.00516083297045	50.5	0.43743184401698204	1450-72-2	Carbonyl compounds	3.6097490696300008	3.59955	3.59819	3.58888	3.55996	3.5565	3.63493	3.64924	3.63015
pos_1954	Lumichrome	光色素	metab_1909	B(ii)	0	43.5	Others	其他类	Pteridines and derivatives	蝶啶及其衍生物	C18	Others	map00740	Riboflavin metabolism	HMDB0254199	M+H	C12H10N4O2	3.10923	核黄素代谢	C01727	pos	-	-	Metabolism	Metabolism of cofactors and vitamins	Organoheterocyclic compounds	Pteridines and derivatives	243.086	0.00248821451549	46.7	-5.75665	1086-80-2	Alloxazines and isoalloxazines	3.28472	3.18125	3.2922422222400005	3.10237	3.08171	3.1248378487299995	3.0307412156700004	3.04575	3.0844
pos_1955	1,3,5,8-Tetrahydroxyxanthone	1,3,5,8-四羟基呫吨酮	metab_1910	B(ii)	0	60.6	Others	其他类	Benzopyrans	苯骈吡喃类	C18	Others	-	-	HMDB0251055	M+CH3OH+H	C13H8O6	3.10923	-	C10056	pos	-	-	-	-	Organoheterocyclic compounds	Benzopyrans	293.06549048700003	0.0026730698640400003	51.5	-0.340984	2980-32-7	1-benzopyrans	2.32226	2.32672	2.33612	2.43083	2.41893	2.42539	2.42386	2.42771	2.42116
pos_1995	4-tert-Butylphenol	对叔丁基苯酚	metab_1950	B(i)	40.3	0	Others	其他类	Others	其他类	C18	Others	-	-	HMDB0032063	M+NH4	C10H14O	3.155	-	C14200	pos	-	-	-	-	Benzenoids	Benzene and substituted derivatives	168.138	0.00123730720577	47.7	0.27489286592088397	98-54-4	Phenylpropanes	4.94003	4.926675144140001	4.92889	4.51945	4.51662	4.52877	3.8631	3.85462	3.84327
pos_2001	Pantetheine	泛硫乙胺	metab_1956	B(i)	93.6	0	Amino acids and derivatives	氨基酸及其衍生物	Beta amino acids and derivatives	Beta氨基酸及其衍生物	C18	Primary metabolite	map01100;map01110;map00770;map00332	Metabolic pathways;Biosynthesis of secondary metabolites;Pantothenate and CoA biosynthesis;Carbapenem biosynthesis	HMDB0003426;PW_C001887	M+H	C11H22N2O4S	3.155	代谢途径;次级代谢产物的生物合成;泛酸和CoA生物合成;碳青霉烯生物合成	C00831	pos	-	-	Metabolism;Metabolism;Metabolism;Metabolism	Global and overview maps;Global and overview maps;Metabolism of cofactors and vitamins;Biosynthesis of other secondary metabolites	Organic acids and derivatives	Carboxylic acids and derivatives	279.137	0.00567071865564	57.6	0.286621541663328	496-65-1	Amino acids, peptides, and analogues	3.98823	3.994108659090001	3.94207	3.97524	4.0057	4.00762	4.13332	4.10548	4.11466
pos_2009	Ile-Lys-Tyr	-	metab_1964	B(i)	53	0	Others	其他类	Others	其他类	C18	Others	-	-	-	M+H	C21H34N4O5	3.155	-	-	pos	-	-	-	-	-	-	423.26	0.00207159326303	49.2	0.38250271416085707	-	-	3.64486	3.67325	3.56939	3.89193	3.95505	3.93689	3.861758917850001	3.81714	3.82868
pos_2022	Sorbose	-	metab_1977	B(i)	47.8	0	Carbohydrates and derivatives	碳水化合物及其衍生物	Monosaccharides	单糖	C18	Primary metabolite	-	-	HMDB0246950;HMDB0303239	M+H-H2O	C6H12O6	3.17798	-	C01452	pos	-	-	-	-	Organic oxygen compounds	Organooxygen compounds	163.06	0.0029969230806799994	49	0.49530830502159795	3615-39-2	Carbohydrates and carbohydrate conjugates	3.09264	3.10093	3.11117	3.12665	3.25438	3.30609	3.208	3.22172	3.18223
pos_2029	Phe-Val	-	metab_1984	B(i)	96.1	0	Amino acids and derivatives	氨基酸及其衍生物	Dipeptides	二肽	C18	Primary metabolite	-	-	HMDB0029008	M+H	C14H20N2O3	3.17798	-	-	pos	-	-	-	-	Organic acids and derivatives	Carboxylic acids and derivatives	265.155	0.00149565928369	58.9	-0.108692	3918-90-9	Amino acids, peptides, and analogues	4.39533	4.3887077678300015	4.34941	4.48012	4.48679	4.51467	4.567051952780001	4.57665	4.553716451880001
pos_2040	Leu-Ile-Thr	-	metab_1995	B(i)	94.6	0	Amino acids and derivatives	氨基酸及其衍生物	Other peptides	其他肽	C18	Primary metabolite	-	-	-	M+H	C16H31N3O5	3.17798	-	-	pos	-	-	-	-	-	-	346.23361822699997	0.00103828052689	57.9	-0.0849052	-	-	4.08923	4.06887	4.02226	4.0858788071599985	4.12717	4.12572	4.30108	4.29064	4.30253
pos_2077	Osthenol	王草酚	metab_2032	B(ii)	0	45.7	Coumarins and derivatives	香豆素类及其衍生物	Coumarins and derivatives	香豆素类及其衍生物	C18	Secondary metabolite	map01110;map00999	Biosynthesis of secondary metabolites;Biosynthesis of various plant secondary metabolites	HMDB0034130	M+Na-H2O	C14H14O3	3.20102	次级代谢产物的生物合成;各种植物次生代谢产物的生物合成	C18080	pos	-	-	Metabolism;Metabolism	Global and overview maps;Biosynthesis of other secondary metabolites	Phenylpropanoids and polyketides	Coumarins and derivatives	235.07463623400002	0.007393884725050001	46.5	4.96286271549868	484-14-0	Hydroxycoumarins	2.84813	2.8010892064200004	2.76045	3.40889	3.37132	3.41742	3.75777	3.80553	3.74693
pos_2092	(2E,4E,6E)-7-Hydroxy-4-methylhepta-2,4,6-trienal	-	metab_2047	B(i)	72.3	0	Others	其他类	Aldehydes and derivatives	醛类及其衍生物	C18	Others	-	-	-	M+H	C8H10O2	3.2238666666699998	-	C20694	pos	-	-	-	-	-	-	139.075	0.00019477540914400004	53.6	0.43106407702301597	-	-	4.0315017278699985	4.0251307385900015	4.03706	4.1013	4.09489	4.10902	4.14348	4.16228	4.1459
pos_2131	1-Isopropyl-3-methylbenzene	1 -异丙基- 3 -甲基苯	metab_2086	B(i)	45	0	Others	其他类	Others	其他类	C18	Others	-	-	HMDB0037051	M+H	C10H14	3.26958	-	-	pos	-	-	-	-	Benzenoids	Benzene and substituted derivatives	135.11692020799998	0.00167279716609	48.6	0.6959006206899541	535-77-3	Cumenes	4.0262443234599985	4.0022	4.00523	4.30565	4.3045314580800005	4.31593	4.50838	4.53828	4.54046
pos_2133	Lyratol	-	metab_2088	B(i)	89.6	0	Lipids	脂质	Fatty Acyls	脂肪酰类	C18	Primary metabolite	-	-	-	M+H	C10H16O	3.26958	-	-	pos	-	-	-	-	-	-	153.127	0.00225308232166	57.7	0.113603922784918	-	-	4.6195749067500005	4.616	4.60225	4.87724	4.87851	4.87696	5.25356	5.281835397719999	5.28107
pos_2134	Delta-Decalactone	δ -癸内酯	metab_2089	B(i)	72.9	0	Others	其他类	Lactones	内酯类	C18	Others	-	-	HMDB0037116;LMFA07040028	M+H	C10H18O2	3.26958	-	-	pos	-	-	-	-	Organoheterocyclic compounds	Lactones	171.138	0.0007940982239269999	53.9	-0.171688	705-86-2	Delta valerolactones	3.19816	3.163	3.21143	3.24298	3.20486	3.22663	3.63457	3.67176	3.6725
pos_2135	Neotussilagine	-	metab_2090	B(ii)	0	46.4	Others	其他类	Others	其他类	C18	Others	-	-	HMDB0031820	M+H-H2O	C10H17NO3	3.26958	-	-	pos	-	-	-	-	Organoheterocyclic compounds	Pyrrolizidines	182.118	0.00419478111313	48.2	0.8053798886326792	147730-89-0	Not Available	3.30691	3.278	3.30072	3.133	3.14623	3.14478	3.11175	3.0835	3.07612
pos_2140	2-O-p-Coumaroyl-D-glucose	2-O-P-酰基-D-葡萄糖	metab_2095	B(ii)	0	56.5	Phenolic acids and derivatives	酚酸类及其衍生物	Cinnamic acids and derivatives	肉桂酸及其衍生物	C18	Secondary metabolite	-	-	HMDB0039167	M+H-H2O	C15H18O8	3.26958	-	-	pos	-	-	-	-	Phenylpropanoids and polyketides	Cinnamic acids and derivatives	309.09668824700003	0.000964064592643	50.2	-0.585822	110351-44-5	Hydroxycinnamic acids and derivatives	3.89644	3.87573	3.88902	4.547179250309999	4.55362	4.53266	3.57983	3.63057	3.5916
pos_2150	Methylsyringin	甲基丁香苷	metab_2105	B(ii)	0	50.7	Carbohydrates and derivatives	碳水化合物及其衍生物	Glycosides	糖苷类	C18	Primary metabolite	-	-	HMDB0039570	M+H	C18H26O9	3.26958	-	-	pos	-	-	-	-	Organic oxygen compounds	Organooxygen compounds	387.162	0.00568015528821	47.6	-6.66937	139742-20-4	Carbohydrates and carbohydrate conjugates	3.1769	3.23449	3.12668	3.84434	3.85046	3.86651	3.2804	3.25771	3.16158
pos_2153	20-COOH-leukotriene E4	20-COOH白三烯E4	metab_2108	B(ii)	0	48.2	Amino acids and derivatives	氨基酸及其衍生物	Cysteine and derivatives	半胱氨酸及其衍生物	C18	Primary metabolite	-	-	HMDB0012634	M+H	C23H35NO7S	3.26958	-	-	pos	-	-	-	-	Organic acids and derivatives	Carboxylic acids and derivatives	470.22316296800005	0.00642096102971	46.3	5.24936268349386	-	Amino acids, peptides, and analogues	3.3470362012700003	3.31877	3.42133	3.93037	3.86376	3.92008	3.95448	3.92319	3.98227
pos_2160	2-oxindole	2-吲哚酮	metab_2115	B(i)	95.5	0	Indoles and derivatives	吲哚及其衍生物	Indoles and derivatives	吲哚及其衍生物	C18	Secondary metabolite	map00402;map01100;map01110;map00999	Benzoxazinoid biosynthesis;Metabolic pathways;Biosynthesis of secondary metabolites;Biosynthesis of various plant secondary metabolites	HMDB0061918	M+H	C8H7NO	3.29167	苯并恶唑嗪酮类生物合成;代谢途径;次级代谢产物的生物合成;各种植物次生代谢产物的生物合成	C12312	pos	-	-	Metabolism;Metabolism;Metabolism;Metabolism	Biosynthesis of other secondary metabolites;Global and overview maps;Global and overview maps;Biosynthesis of other secondary metabolites	Organoheterocyclic compounds	Indoles and derivatives	134.06	0.00191548823952	58.6	0.8924329003109971	59-48-3	Indolines	4.8775683692300005	4.854275432890001	4.865193050069999	4.42926	4.45382	4.4157219678300015	3.3926009035000004	3.39365	3.40769
pos_2163	Cepanone	塞班酮	metab_2118	B(ii)	0	61.1	Others	其他类	Others	其他类	C18	Others	-	-	HMDB0032098	M+H-2H2O	C13H22O2	3.29167	-	-	pos	-	-	-	-	Organoheterocyclic compounds	Dihydrofurans	175.148	0.00156725692658	51.7	0.20616905861294502	57877-72-2	Furanones	3.12827	3.07764	3.10876	3.90681	3.89907	3.89991	2.97055	3.08922	2.9928827353200003
pos_2166	1-(3,4-Dimethoxyphenyl)-1,3-propanediol	-	metab_2121	B(i)	86.7	0	Others	其他类	Others	其他类	C18	Others	-	-	-	M+H	C11H16O4	3.29167	-	-	pos	-	-	-	-	-	-	213.11213677799998	0.00166225851122	56.9	0.0063854929061548	-	-	3.39185	3.39077	3.38573	4.35484	4.346739692840002	4.34806	4.49444	4.50849	4.51145
pos_2169	Coriandrone E	-	metab_2124	B(ii)	0	47.1	Others	其他类	Benzopyrans	苯骈吡喃类	C18	Others	-	-	HMDB0029971	M+ACN+Na	C13H12O5	3.29167	-	-	pos	-	-	-	-	Organoheterocyclic compounds	Benzopyrans	312.087	0.000967608975105	46	9.11004015934309	177795-34-5	2-benzopyrans	2.29344	2.10157	2.30441	2.01607	2.18196	2.23578	2.04561	1.81748	1.89687
pos_2170	Furoparadine	呋喃帕定	metab_2125	B(ii)	0	50.9	Others	其他类	Quinolines and derivatives	喹啉及其衍生物	C18	Others	-	-	HMDB0041087	M+NH4	C17H13NO5	3.29167	-	-	pos	-	-	-	-	Organoheterocyclic compounds	Quinolines and derivatives	329.113	0.00175008893641	49.4	-0.463179	161161-72-4	Benzoquinolines	2.54495	2.62133	2.6093	2.50071	2.29502	2.50168	2.83474	3.0645584503099994	2.9452
pos_2171	Rosiridin	络塞定	metab_2126	B(i)	43.8	0	Others	其他类	Others	其他类	C18	Others	-	-	-	M+H	C16H28O7	3.29167	-	-	pos	-	-	-	-	-	-	333.191	0.00182802348035	47.7	-0.456945	-	-	3.1090521256800003	3.07236	3.07663	3.71227	3.71082	3.74001	3.82495	3.78839	3.84338
pos_2184	Narirutin 4'-glucoside	-	metab_2138	B(ii)	0	56.6	Flavonoids	类黄酮	Flavonoid glycosides	黄酮糖苷	C18	Secondary metabolite	-	-	HMDB0037584	M+H	C33H42O19	3.29167	-	-	pos	-	-	-	-	Phenylpropanoids and polyketides	Flavonoids	743.239	0.0019817595106400004	51	-0.0316736	17257-22-6	Flavonoid glycosides	0.20357	1.80923	0.20883	0.247633	0.242482	0.245266	0.244606	0.246274	0.24344
pos_2188	5-Hydroxycoumarin	-	metab_2142	B(i)	93.3	0	Coumarins and derivatives	香豆素类及其衍生物	Coumarins and derivatives	香豆素类及其衍生物	C18	Secondary metabolite	-	-	-	M+H	C9H6O3	3.31425	-	-	pos	-	-	-	-	-	-	163.039	0.00149522545263	58.2	-0.141508	-	-	4.43816	4.428529613399999	4.37807	4.46897	4.43598	4.48814	4.49444	4.55204	4.4955
pos_2192	Ficusol	-	metab_2146	B(i)	73.1	0	Others	其他类	Others	其他类	C18	Others	-	-	-	M+H	C11H14O5	3.31425	-	-	pos	-	-	-	-	-	-	227.09132575900003	0.005512657271369999	53.9	-0.328282	-	-	3.85349	3.80332	3.81596	3.95403	3.90664	3.93516	3.898	3.98726	4.04224
pos_2195	Taxifolin	毒叶素	metab_2149	B(i)	74.1	0	Flavonoids	类黄酮	Flavanol	黄烷醇	C18	Secondary metabolite	map01100;map00941;map01110	Metabolic pathways;Flavonoid biosynthesis;Biosynthesis of secondary metabolites	HMDB0303943;HMDB0242509;LMPK12140721	M+H	C15H12O7	3.31425	代谢途径;类黄酮生物合成;次级代谢产物的生物合成	C01617	pos	-	-	Metabolism;Metabolism;Metabolism	Global and overview maps;Biosynthesis of other secondary metabolites;Global and overview maps	Phenylpropanoids and polyketides	Flavonoids	305.06539916599996	0.0005303234241530001	54	-0.591952	480-18-2	Flavans	3.20641	3.15845	3.22596	3.963	3.92652	3.946	4.31707	4.3314083203400005	4.30219
pos_2197	1-Caffeoyl-beta-D-glucose	-	metab_2151	B(i)	86.9	0	Phenolic acids and derivatives	酚酸类及其衍生物	Cinnamic acids and derivatives	肉桂酸及其衍生物	C18	Secondary metabolite	-	-	HMDB0036937;HMDB0302440;HMDB0302440	M+H	C15H18O9	3.31425	-	C10433	pos	-	-	-	-	Phenylpropanoids and polyketides	Cinnamic acids and derivatives	343.102	0.00433278547197	56	-0.56787	14364-08-0	Hydroxycinnamic acids and derivatives	1.71176	1.71615	1.72541	2.69431	2.8611	3.0420378130000003	2.21206	2.58742	1.80935
pos_2204	Cephamycin C	-	metab_2158	B(ii)	0	44.7	Others	其他类	Others	其他类	C18	Others	map01100;map01110	Metabolic pathways;Biosynthesis of secondary metabolites	HMDB0249812	M+NH4	C16H22N4O9S	3.31425	代谢途径;次级代谢产物的生物合成	C06566	pos	Antibiotics	beta-Lactams	Metabolism;Metabolism	Global and overview maps;Global and overview maps	Organoheterocyclic compounds	Lactams	464.14031850699996	0.0017393737949700002	44.9	-9.54096	38429-35-5	Beta lactams	2.4381	2.10264	2.1942	3.24807	3.07873	3.20296	2.4374878148700003	2.6043	1.75364
pos_2207	Flavonol base+4o,o-hex,o-malonylhex	-	metab_2161	B(i)	42.3	0	Flavonoids	类黄酮	Flavonoid glycosides	黄酮糖苷	C18	Secondary metabolite	-	-	-	M+H	C30H32O20	3.31425	-	-	pos	-	-	-	-	-	-	713.155	0.0027350827227199995	47.2	-1.07632	-	-	1.6671422749200002	1.67152	1.68076	3.5172542654300005	3.5349509533800005	3.54098	4.87089	4.8476099478900005	4.86331
pos_2213	Caffeic acid	咖啡酸	metab_2167	B(i)	98.7	0	Phenolic acids and derivatives	酚酸类及其衍生物	Cinnamic acids and derivatives	肉桂酸及其衍生物	C18	Secondary metabolite	map01100;map00940;map01110	Metabolic pathways;Phenylpropanoid biosynthesis;Biosynthesis of secondary metabolites	HMDB0001964;HMDB0003501;HMDB0001964	M+H	C9H8O4	3.3369	代谢途径;苯丙烷生物合成;次级代谢产物的生物合成	C01197;C01481	pos	-	-	Metabolism;Metabolism;Metabolism	Global and overview maps;Biosynthesis of other secondary metabolites;Global and overview maps	Phenylpropanoids and polyketides	Cinnamic acids and derivatives	181.04953445400002	0.0013366076801199999	59.2	-0.00396007	501-16-6;331-39-5	Hydroxycinnamic acids and derivatives	3.47964	3.4537640753300005	3.47095	3.26452	3.23016	3.25116	3.13832	3.12361	3.13875
pos_2214	2-Phenyl-1,3-propanediol monocarbamate	2 -苯基- 1，3 -丙二醇单氨基甲酸酯	metab_2168	B(ii)	0	46.4	Others	其他类	Others	其他类	C18	Others	-	-	HMDB0060351	M+H	C10H13NO3	3.3369	-	C16586	pos	-	-	-	-	Benzenoids	Benzene and substituted derivatives	196.097	0.004533772662800001	48	0.122792282400563	25451-53-0	Not Available	3.63147	3.58942	3.62244	3.4835676122800003	3.45542	3.4957257849900003	3.35212	3.42309	3.43404
pos_2215	Ala-Trp	-	metab_2169	B(i)	87.4	0	Others	其他类	Others	其他类	C18	Others	-	-	HMDB0013209	M+H	C14H17N3O3	3.3369	-	-	pos	-	-	-	-	Organic acids and derivatives	Carboxylic acids and derivatives	276.134	0.0051888125621400005	55.7	0.0835970493706328	16305-75-2	Amino acids, peptides, and analogues	3.92557	3.90736	3.88992	3.89169	3.91279	3.88351	4.09354	4.07716	4.09862
pos_2216	Pro-Pro-Pro	聚左旋脯氨酸	metab_2170	B(ii)	0	50.2	Others	其他类	Others	其他类	C18	Others	-	-	HMDB0256689	M+H	C15H23N3O4	3.3369	-	-	pos	-	-	-	-	Organic acids and derivatives	Carboxylic acids and derivatives	310.176	0.00302731019446	48.7	-1.73982	-	Amino acids, peptides, and analogues	2.94793	2.92582	2.8657420110900005	2.0385	2.39051	2.24229	2.51267	2.33668	2.38405
pos_2231	5-Hydroxyindoleacetic acid	5-羟基吲哚乙酸	metab_2185	B(i)	96.6	0	Indoles and derivatives	吲哚及其衍生物	Indoles and derivatives	吲哚及其衍生物	C18	Secondary metabolite	map01100;map00380	Metabolic pathways;Tryptophan metabolism	HMDB0000763;PW_C000609	M+H	C10H9NO3	3.35973	代谢途径;色氨酸代谢	C05635	pos	-	-	Metabolism;Metabolism	Global and overview maps;Amino acid metabolism	Organoheterocyclic compounds	Indoles and derivatives	192.066	0.0021544078161900002	58.8	0.217695820461309	54-16-0	Indolyl carboxylic acids and derivatives	3.2976	3.1859	3.2619	3.80041	3.83281	3.8287	3.82968	3.85217	3.90957
pos_2237	Ile-Phe-Ser	-	metab_2191	B(i)	51.1	0	Others	其他类	Others	其他类	C18	Others	-	-	-	M+H	C18H27N3O5	3.35973	-	-	pos	-	-	-	-	-	-	366.20300594400004	0.0011829463892500001	49	1.80323996138652	-	-	4.26713	4.2441206750300005	4.2355886960400015	4.6235476685500005	4.614	4.59578	4.501290367109999	4.52337	4.54399
pos_2252	Hyrtioerectine C	-	metab_2205	B(i)	92.2	0	Indoles and derivatives	吲哚及其衍生物	Indoles and derivatives	吲哚及其衍生物	C18	Secondary metabolite	-	-	-	M+H	C11H11NO4	3.38262	-	-	pos	-	-	-	-	-	-	222.076	0.006319466018350001	56.3	0.173454237955331	-	-	3.56899	3.5021529258599995	3.4945603387800004	3.53789	3.6154	3.6023	2.8722629251800003	2.96428	3.01796
pos_2253	Elenaic acid	-	metab_2206	B(ii)	0	58.5	Organic acids and derivatives	有机酸及其衍生物	Organic acids and derivatives	有机酸及其衍生物	C18	Secondary metabolite	-	-	HMDB0039136	M+H	C11H14O6	3.38262	-	-	pos	-	-	-	-	Organic acids and derivatives	Carboxylic acids and derivatives	243.086	0.0014689792555399998	50.9	-0.415165	34422-12-3	Dicarboxylic acids and derivatives	2.95939	2.8856682903900004	2.86443	2.52618	1.7591738682799998	2.70099	2.62409	2.57899	2.39951
pos_2254	Met-Leu	-	metab_2207	B(i)	82.2	0	Amino acids and derivatives	氨基酸及其衍生物	Dipeptides	二肽	C18	Primary metabolite	-	-	HMDB0028977	M+H	C11H22N2O3S	3.38262	-	-	pos	-	-	-	-	Organic acids and derivatives	Carboxylic acids and derivatives	263.141	0.00141347255519	54.5	-5.42556	-	Amino acids, peptides, and analogues	4.59693	4.6055	4.57877	4.65757	4.67588	4.65625	4.8000635459800005	4.811146025019999	4.84206
pos_2255	Dalbergioidin	-	metab_2208	B(i)	50.3	0	Flavonoids	类黄酮	Isoflavones	异黄酮	C18	Secondary metabolite	-	-	HMDB0032707	M+H	C15H12O6	3.38262	-	C10415	pos	-	-	-	-	Phenylpropanoids and polyketides	Isoflavonoids	289.071	0.0017617089196800002	49.4	-0.395486	30368-42-4	Isoflavans	2.71647	2.65905	2.68965	3.74285	3.7663	3.73095	3.62635	3.65222	3.64143
pos_2258	Lys-Tyr	-	metab_2211	B(ii)	0	50.6	Others	其他类	Others	其他类	C18	Others	-	-	HMDB0028963	M+NH4	C15H23N3O4	3.38262	-	-	pos	-	-	-	-	Organic acids and derivatives	Carboxylic acids and derivatives	327.201	0.00321442978857	48	-4.48209	35978-98-4	Amino acids, peptides, and analogues	4.28633	4.27865	4.270707485369999	4.28565	4.30351	4.31112	4.27176	4.30779	4.34
pos_2259	Lys-Ser-Lys	-	metab_2212	B(i)	68.1	0	Others	其他类	Others	其他类	C18	Others	-	-	-	M+H-H2O	C15H31N5O5	3.38262	-	-	pos	-	-	-	-	-	-	344.228	0.0015577290882000001	51	-3.88234	-	-	4.48137	4.4742035815699985	4.45244	4.47229	4.49187	4.497684980940001	4.46134	4.4836	4.49852
pos_2260	Cassiaside	决明子苷	metab_2213	B(ii)	0	65.8	Others	其他类	Naphthopyrans	萘并吡喃类	C18	Others	-	-	HMDB0033913	M+	C20H20O9	3.38262	-	-	pos	-	-	-	-	Organoheterocyclic compounds	Naphthopyrans	404.113	0.00437961642575	51.4	5.22045357621248	123914-49-8	Naphthopyranones	2.8507055294200003	3.13338	2.99879	3.33851	3.32401	3.4033	3.1347463936799995	2.76316	2.78855
pos_2262	Cyanidin 7-arabinoside	矢车菊素- 7 -阿拉伯糖苷	metab_2215	B(ii)	0	50.8	Flavonoids	类黄酮	Other flavonoids	其他类黄酮	C18	Secondary metabolite	-	-	HMDB0037989	M+	C20H19O10+	3.38262	-	-	pos	-	-	-	-	Phenylpropanoids and polyketides	Flavonoids	419.095	0.00727482560463	46.5	-7.26175	28985-03-7	Hydroxyflavonoids	3.1622744605400004	3.18161	3.14464	3.34782	3.21888	3.16862	3.33141	3.32998	3.35671
pos_2264	Gaultherin	-	metab_2217	B(i)	59.3	0	Carbohydrates and derivatives	碳水化合物及其衍生物	Glycosides	糖苷类	C18	Primary metabolite	-	-	HMDB0303042	M+Na-H2O	C19H26O12	3.38262	-	-	pos	-	-	-	-	Organic oxygen compounds	Organooxygen compounds	451.123	0.00074969485544	50.6	3.67667429966771	-	Carbohydrates and carbohydrate conjugates	2.37085	2.04189	1.59874	2.02566	2.45145	2.81231	2.9270386109400004	3.0021545828900003	2.8247385789599995
pos_2287	Lys-Ile-Ile	-	metab_2237	B(i)	69.7	0	Amino acids and derivatives	氨基酸及其衍生物	Oligopeptides	寡肽	C18	Primary metabolite	-	-	-	M+H	C18H36N4O4	3.4056	-	-	pos	-	-	-	-	-	-	373.28092135099996	0.000887791492882	52.9	-0.0288299	-	-	4.49586	4.49578	4.49063	4.64504	4.66722	4.66836	4.7711	4.79727	4.79905
pos_2305	Asn-Pro-Lys	-	metab_2253	B(i)	63.5	0	Others	其他类	Others	其他类	C18	Others	-	-	-	M+H	C15H27N5O5	3.4287166666699997	-	-	pos	-	-	-	-	-	-	358.207	0.00195604323338	49.9	-4.3573	-	-	3.79433	3.81306	3.75797	3.84846	3.87421	3.85046	3.8755710046300007	3.93242	3.87809
pos_2307	6-Hydroxy-2-bornanone glucoside	6-羟基-樟脑葡萄糖苷	metab_2255	B(ii)	0	60.8	Terpenoids	萜类	Other terpenoids	其他萜类	C18	Secondary metabolite	-	-	HMDB0034558	M+ACN+Na	C16H26O7	3.4287166666699997	-	-	pos	-	-	-	-	Lipids and lipid-like molecules	Prenol lipids	394.18617550199997	0.00113980399329	49.7	7.73107233753412	155551-16-9	Terpene glycosides	5.1114	5.0931	5.08198	5.0133174822300015	4.97766	5.00249	4.6321	4.69473	4.6606
pos_2308	Arg-Leu-Leu	-	metab_2256	B(i)	88.6	0	Others	其他类	Others	其他类	C18	Others	-	-	-	M+H	C18H36N6O4	3.4287166666699997	-	-	pos	-	-	-	-	-	-	401.287	0.00014186050074	56.6	-0.00544052	-	-	4.480295809609999	4.458866962119999	4.45704	4.67491	4.69669	4.68166	4.8144	4.83487	4.81691
pos_2310	Tyr-Asp-Met	-	metab_2258	B(i)	42.3	0	Others	其他类	Others	其他类	C18	Others	-	-	-	M+NH4	C18H25N3O7S	3.4287166666699997	-	-	pos	-	-	-	-	-	-	445.175	0.0022750018337800004	47	-0.0631355	-	-	3.98974	3.88724	3.86261	4.16563	4.17599	4.16734	3.82013	3.91419	3.87654
pos_2311	6-C-Galactosylisoscutellarein	-	metab_2259	B(i)	93.7	0	Flavonoids	类黄酮	Flavonoid glycosides	黄酮糖苷	C18	Secondary metabolite	-	-	LMPK12111337	M+H	C21H20O11	3.4287166666699997	-	-	pos	-	-	-	-	-	-	449.108	0.00354376644544	57.5	0.131018779472697	-	-	2.3078782548500003	2.70202	2.10333	4.14256	4.13744	4.13267	4.78823	4.85242	4.83879
pos_2325	4-Isopropyl-3-cyclohexene-1-carboxylic acid	4 -异丙基- 3 -环己烯- 1 -羧酸	metab_2273	B(ii)	0	50	Terpenoids	萜类	Monoterpenoids	单萜	C18	Secondary metabolite	-	-	HMDB0037175	M+H-H2O	C10H16O2	3.4514333333300002	-	-	pos	-	-	-	-	Lipids and lipid-like molecules	Prenol lipids	151.112	0.000733763711478	49.6	0.341272847459457	56424-87-4	Monoterpenoids	4.43134	4.41673	4.3983	4.84304	4.83094	4.83747	4.81487	4.84584	4.831854625319999
pos_2333	2-Galloylglucose	2 -没食子酰葡萄糖	metab_2281	B(ii)	0	64.4	Phenolic acids and derivatives	酚酸类及其衍生物	Benzoic acids and derivatives	苯甲酸及其衍生物	C18	Secondary metabolite	-	-	HMDB0039625	M+H-2H2O	C13H16O10	3.4514333333300002	-	-	pos	-	-	-	-	Benzenoids	Benzene and substituted derivatives	297.06041500599997	0.00166408465593	50.3	-0.237184	98917-85-2	Benzoic acids and derivatives	3.2601191222500003	3.31042	3.26387	3.53862	3.44991	3.5503911409699995	3.74159	3.92351	3.82486
pos_2335	DCMP	-	metab_2283	B(ii)	0	47.3	Nucleotides and derivatives	核苷酸及其衍生物	Nucleotides and derivatives	核苷酸及其衍生物	C18	Primary metabolite	map00240;map01100;map01232	Pyrimidine metabolism;Metabolic pathways;Nucleotide metabolism	HMDB0001202	M+NH4	C9H14N3O7P	3.4514333333300002	嘧啶代谢;代谢途径;核苷酸代谢	C00239	pos	Nucleic acids	Nucleotides	Metabolism;Metabolism;Metabolism	Nucleotide metabolism;Global and overview maps;Global and overview maps	Nucleosides, nucleotides, and analogues	Pyrimidine nucleotides	325.092	0.0020164578067300002	47.6	3.1758537950933703	1032-65-1	Pyrimidine deoxyribonucleotides	2.89133	2.90448	2.70511	4.10308	4.10989	4.12504	3.30851	3.20735	3.08809
pos_2364	Leu-Phe-Tyr	-	metab_2311	B(i)	50.8	0	Others	其他类	Others	其他类	C18	Others	-	-	-	M+K	C24H31N3O5	3.4743	-	-	pos	-	-	-	-	-	-	480.18650551699994	0.005239816361609999	47.9	-6.85288	-	-	2.06435	2.61301	2.289	2.17254	2.19119	2.16712	2.72937	2.91225	3.05392
pos_2369	2-Oxobutyric acid	-	metab_2316	B(i)	37.5	0	Organic acids and derivatives	有机酸及其衍生物	Organic acids and derivatives	有机酸及其衍生物	C18	Secondary metabolite	map01100;map01110;map00640;map00290;map01210;map00270;map01230;map00260;map00660	Metabolic pathways;Biosynthesis of secondary metabolites;Propanoate metabolism;Valine, leucine and isoleucine biosynthesis;2-Oxocarboxylic acid metabolism;Cysteine and methionine metabolism;Biosynthesis of amino acids;Glycine, serine and threonine metabolism;C5-Branched dibasic acid metabolism	HMDB0000005	M+H-H2O	C4H6O3	3.4966	代谢途径;次级代谢产物的生物合成;丙酸代谢;缬氨酸、亮氨酸和异亮氨酸生物合成;2-氧代羧酸代谢;半胱氨酸和蛋氨酸代谢;氨基酸生物合成;甘氨酸、丝氨酸和苏氨酸代谢;C5-二元酸分支代谢	C00109	pos	Organic acids	Carboxylic acids	Metabolism;Metabolism;Metabolism;Metabolism;Metabolism;Metabolism;Metabolism;Metabolism;Metabolism	Global and overview maps;Global and overview maps;Carbohydrate metabolism;Amino acid metabolism;Global and overview maps;Amino acid metabolism;Global and overview maps;Amino acid metabolism;Carbohydrate metabolism	Organic acids and derivatives	Keto acids and derivatives	85.029	0.00439308406862	45.9	5.50927940691939	600-18-0	Short-chain keto acids and derivatives	3.24887	3.2198	3.23686	3.23342	3.2337182495200003	3.2237051774000003	3.11516	3.15919	3.19273
pos_2375	3-Isochromanone	3-异色酮	metab_2322	B(i)	85.9	0	Others	其他类	Benzopyrans	苯骈吡喃类	C18	Others	-	-	-	M+H	C9H8O2	3.4966	-	C07728	pos	-	-	-	-	-	-	149.06	0.0020889254929300004	56.5	0.510737026720549	4385-35-7	-	3.3984	3.37144	3.39037	3.80237	3.78022	3.7741	3.5295182628300004	3.5352951365300007	3.54498
pos_2377	Gluconolactone	葡糖酸内酯	metab_2324	B(i)	71	0	Carbohydrates and derivatives	碳水化合物及其衍生物	Other carbohydrates and derivatives	其他类碳水化合物及其衍生物	C18	Primary metabolite	map01100;map00030;map01110;map01200	Metabolic pathways;Pentose phosphate pathway;Biosynthesis of secondary metabolites;Carbon metabolism	HMDB0000150;PW_C000097	M+H-H2O	C6H10O6	3.4966	代谢途径;磷酸戊糖途径;次级代谢产物的生物合成;碳代谢	C00198	pos	-	-	Metabolism;Metabolism;Metabolism;Metabolism	Global and overview maps;Carbohydrate metabolism;Global and overview maps;Global and overview maps	Organic oxygen compounds	Organooxygen compounds	161.044	0.0030977526912100003	53.8	0.0980393691983203	90-80-2	Carbohydrates and carbohydrate conjugates	2.91767	2.88822	2.9470266034500003	2.8798934441500004	2.88005	2.8481282148400004	2.8861	2.83313	2.90266
pos_2381	Thr-Val	-	metab_2328	B(i)	57.6	0	Others	其他类	Others	其他类	C18	Others	-	-	HMDB0029074	M+H-H2O	C9H18N2O4	3.4966	-	-	pos	-	-	-	-	Organic acids and derivatives	Carboxylic acids and derivatives	201.123	0.000739171182169	50.6	0.0585798754808981	99032-17-4	Amino acids, peptides, and analogues	3.9916	3.98555	3.99294	4.0228301113699985	4.0341	4.03524	4.09014	4.1244	4.10979
pos_2383	Swerilactone M	-	metab_2330	B(i)	47.3	0	Others	其他类	Benzopyrans	苯骈吡喃类	C18	Others	-	-	-	M+H	C13H14O4	3.4966	-	-	pos	-	-	-	-	-	-	235.096	0.0044220007633	48.9	-0.217385	-	-	3.095335656870001	3.0387314687700004	3.09981	2.91595	3.04421	2.97027	2.9995084334099995	3.0924432309900003	3.03715
pos_2400	Doxycycline	强力霉素	metab_2347	B(ii)	0	64.3	Others	其他类	Others	其他类	C18	Others	-	-	HMDB0014399	M+K	C22H24N2O8	3.4966	-	C06973	pos	-	-	-	-	Phenylpropanoids and polyketides	Tetracyclines	483.113	0.0030430329706999997	50.9	-6.89811	564-25-0	Not Available	2.15088	2.15533	2.1647	2.25923	2.24735	2.25379	2.25227	2.25611	2.24957
pos_2405	(3''-Apiosyl-6''-malonyl)astragalin	（3’’-芹菜酰基-6’’-丙二酰基）黄芪甲苷	metab_2352	B(ii)	0	70.4	Flavonoids	类黄酮	Flavonoid glycosides	黄酮糖苷	C18	Secondary metabolite	-	-	HMDB0038765	M+H	C29H30O18	3.4966	-	-	pos	-	-	-	-	Phenylpropanoids and polyketides	Flavonoids	667.15	0.00937719595805	53.1	-0.739279	119067-83-3	Flavonoid glycosides	2.20261	2.20705	2.21644	2.31103	2.29914	2.30559	2.30407	2.30791	2.30137
pos_2412	Cleviolide	-	metab_2359	B(i)	70.8	0	Others	其他类	Others	其他类	C18	Others	-	-	-	M+H	C10H10O2	3.51905	-	-	pos	-	-	-	-	-	-	163.075	0.00321788734054	52.9	0.0532482302648488	-	-	3.67298	3.68066	3.63431	3.642496028430001	3.66085	3.65117	3.51218	3.55061	3.56563
pos_2417	Caffeic acid 3-glucoside	咖啡酸- 3 -葡萄糖苷	metab_2364	B(ii)	0	57.8	Carbohydrates and derivatives	碳水化合物及其衍生物	Glycosides	糖苷类	C18	Primary metabolite	-	-	HMDB0303040	M+H-2H2O	C15H18O9	3.51905	-	C10431	pos	-	-	-	-	Organic oxygen compounds	Organooxygen compounds	307.081	0.013007195370399998	50.8	-0.0489045	24959-81-7	Carbohydrates and carbohydrate conjugates	1.7806681938799995	2.03617	2.1770834582700003	3.26883	3.26211	3.2526	4.29763	4.3021519233099985	4.29934
pos_2418	Ser-Val-Ile	-	metab_2365	B(i)	76.9	0	Others	其他类	Others	其他类	C18	Others	-	-	-	M+H	C14H27N3O5	3.51905	-	-	pos	-	-	-	-	-	-	318.202	0.0012376402402000002	54.4	-0.106377	-	-	4.25619	4.28908	4.27378	4.30228	4.31262	4.29177	4.38553	4.376813254040002	4.40041
pos_2419	Thr-Val-Leu	-	metab_2366	B(i)	91.2	0	Amino acids and derivatives	氨基酸及其衍生物	Oligopeptides	寡肽	C18	Primary metabolite	-	-	-	M+H	C15H29N3O5	3.51905	-	-	pos	-	-	-	-	-	-	332.218	0.00108697810801	57.2	-0.331183	-	-	4.19996	4.223921788319998	4.2106970756800015	4.3953776814599985	4.40292	4.3605197889300005	4.46547	4.49244	4.46708
pos_2436	Delphinidin 3-[6-(4-(Z)-p-coumarylrhamnosyl)glucoside] 5-glucoside	飞燕草素3-[6-（4-（Z）-p-香豆素鼠李糖基）葡萄糖苷]5-葡萄糖苷	metab_2383	B(ii)	0	52.7	Flavonoids	类黄酮	Anthocyanidin	花青素	C18	Secondary metabolite	map00942	Anthocyanin biosynthesis	HMDB0301991	M+	C42H47O23+	3.51905	花青素生物合成	C16294	pos	-	-	Metabolism	Biosynthesis of other secondary metabolites	Phenylpropanoids and polyketides	Flavonoids	919.25	0.0031112790952	49.6	-1.09217	-	Flavonoid glycosides	3.11595	3.04751	2.89563	4.90719	4.9232	4.89562	3.922	3.94588	3.99029
pos_2437	4-Hydroxyphenylacetaldehyde	4 -羟基苯乙醛	metab_2384	B(ii)	0	52.6	Others	其他类	Aldehydes and derivatives	醛类及其衍生物	C18	Others	map01100;map00950;map01110;map00350	Metabolic pathways;Isoquinoline alkaloid biosynthesis;Biosynthesis of secondary metabolites;Tyrosine metabolism	HMDB0003767	M+ACN+H	C8H8O2	3.54212	代谢途径;异喹啉生物碱生物合成;次级代谢产物的生物合成;酪氨酸代谢	C03765	pos	-	-	Metabolism;Metabolism;Metabolism;Metabolism	Global and overview maps;Biosynthesis of other secondary metabolites;Global and overview maps;Amino acid metabolism	Benzenoids	Benzene and substituted derivatives	178.08631374400002	0.00233107469562	49.9	0.43158307070689594	7339-87-9	Phenylacetaldehydes	3.30524	3.37155	3.37108	3.30365	3.2491	3.25986	4.1408	4.16244	4.15323
pos_2439	Eugenitol	番樱桃醇	metab_2386	B(i)	83.5	0	Others	其他类	Benzopyrans	苯骈吡喃类	C18	Others	-	-	HMDB0029466	M+NH4	C11H10O4	3.54212	-	-	pos	-	-	-	-	Organoheterocyclic compounds	Benzopyrans	224.092	0.0024981636626999998	56.1	-0.425604	491-48-5	1-benzopyrans	2.99405	3.11214	3.1710538395200003	4.1168609621800005	4.13263	4.09757	4.28525	4.2784742590099984	4.294377076569998
pos_2443	Phe-Met	-	metab_2390	B(i)	35.2	0	Others	其他类	Others	其他类	C18	Others	-	-	HMDB0029001	M+H	C14H20N2O3S	3.54212	-	-	pos	-	-	-	-	Organic acids and derivatives	Carboxylic acids and derivatives	297.127	0.00211094383007	46	-0.265416	15080-84-9	Amino acids, peptides, and analogues	3.87333	3.90185	3.86878	3.81812	3.81012	3.80991	4.23345	4.22875	4.22893
pos_2451	Flemingin C	-	metab_2397	B(i)	93.9	0	Flavonoids	类黄酮	Chalcones	查尔酮	C18	Secondary metabolite	-	-	LMPK12120132	M+H	C25H26O6	3.54212	-	-	pos	-	-	-	-	-	-	423.179	0.00129911016672	56.7	-1.70715	-	-	4.04364	4.0328217453500015	4.01659	4.19094	4.194124296530002	4.17264	4.40386	4.369310346130002	4.399
pos_2457	1-Nitro-7-glutathionyl-8-hydroxy-7,8-dihydronaphthalene	1-硝基-7-谷胱甘肽-8-羟基-7,8-二氢萘	metab_2403	B(ii)	0	40.6	Amino acids and derivatives	氨基酸及其衍生物	Oligopeptides	寡肽	C18	Primary metabolite	-	-	HMDB0060329	M+H	C20H24N4O9S	3.54212	-	C14804	pos	-	-	-	-	Benzenoids	Naphthalenes	497.129	0.00393550467792	44.3	-9.64893	-	Not Available	0.786978	0.7907243140829999	0.798653	2.68921	2.35952	2.6073	2.84732	2.76687	2.61177
pos_2460	Isoacteoside	异洋丁香酚苷	metab_2406	B(ii)	0	62.1	Phenolic acids and derivatives	酚酸类及其衍生物	Cinnamic acids and derivatives	肉桂酸及其衍生物	C18	Secondary metabolite	-	-	HMDB0041025	M+ACN+H	C29H36O15	3.54212	-	-	pos	-	-	-	-	Phenylpropanoids and polyketides	Cinnamic acids and derivatives	666.239	0.00203191636593	51.9	0.100880833248316	61303-13-7	Hydroxycinnamic acids and derivatives	2.20147	2.20592	2.2153	2.30989	2.29801	2.30445	2.30293	2.30678	2.30023
pos_2464	Diethanolamine	二乙醇胺	metab_2410	B(i)	50.2	0	Others	其他类	Amines and derivatives	胺类及其衍生物	C18	Others	map00564	Glycerophospholipid metabolism	HMDB0004437	M+H-2H2O	C4H11NO2	3.56507	甘油磷脂代谢	C06772	pos	-	-	Metabolism	Lipid metabolism	Organic nitrogen compounds	Organonitrogen compounds	70.0659	0.008214208128600001	48.3	7.26897117370449	111-42-2	Amines	2.91121	2.88826	2.88023	2.45253	2.37497	2.44069	2.29652	2.35592	2.2599
pos_2470	(Z)-3-Oxo-2-(2-pentenyl)-1-cyclopenteneacetic acid	（Z） -3-氧代-2-（2-戊烯基）-1-环戊烯乙酸	metab_2416	B(ii)	0	47.7	Others	其他类	Ketones and derivatives	酮类及其衍生物	C18	Others	-	-	HMDB0030197	M+H	C12H16O3	3.56507	-	-	pos	-	-	-	-	Organic oxygen compounds	Organooxygen compounds	209.117	0.000997900705264	48.9	-0.100149	120282-76-0	Carbonyl compounds	3.28675	3.33546	3.35221	3.46497	3.49216	3.46735	3.5790815642800005	3.61307	3.62353
pos_2471	11-Hydroxyjasmonic acid	-	metab_2417	B(i)	93.7	0	Lipids	脂质	Fatty Acyls	脂肪酰类	C18	Primary metabolite	-	-	-	M+H	C12H18O4	3.56507	-	-	pos	-	-	-	-	-	-	227.12771462700002	0.000774654749116	58.1	-0.313374	-	-	3.67423	3.68836	3.6708	4.005369578490002	4.03644	3.96442	4.05944	4.08795	4.09794
pos_2472	Ile-Leu	-	metab_2418	B(i)	82.7	0	Amino acids and derivatives	氨基酸及其衍生物	Dipeptides	二肽	C18	Primary metabolite	-	-	HMDB0028911	M+H	C12H24N2O3	3.56507	-	-	pos	-	-	-	-	Organic acids and derivatives	Carboxylic acids and derivatives	245.186	0.000862136824323	56	-0.234178	-	Amino acids, peptides, and analogues	5.17895	5.1754	5.1789	5.24281	5.2583533546300005	5.24075	5.287228934280001	5.298838535480001	5.28994
pos_2475	Val-Ala-Ile	-	metab_2421	B(i)	86.9	0	Amino acids and derivatives	氨基酸及其衍生物	Other peptides	其他肽	C18	Primary metabolite	-	-	-	M+H	C14H27N3O4	3.56507	-	-	pos	-	-	-	-	-	-	302.20736855900003	0.000730068563977	56.6	-0.213252	-	-	4.50129	4.516191925249999	4.50605	4.62857	4.63679	4.62173	4.72642	4.7307108837300005	4.7228
pos_2478	4-Hydroxyvoriconazole	-	metab_2424	B(ii)	0	43.5	Others	其他类	Others	其他类	C18	Others	-	-	HMDB0060894	M+NH4	C16H14F3N5O2	3.56507	-	-	pos	-	-	-	-	Benzenoids	Benzene and substituted derivatives	383.145	0.00258352605554	47.5	3.1225588570234595	-	Phenylpropanes	3.68905	3.68541	3.71537	3.43822	3.50117	3.4292227902900003	2.95936	2.71575	2.8212834904500004
pos_2482	5-O-Feruloylnigrumin	5 - O -阿魏酰基黑曲霉素	metab_2428	B(ii)	0	47.4	Lipids	脂质	Fatty Acyls	脂肪酰类	C18	Primary metabolite	-	-	HMDB0038735	M+H	C21H25NO10	3.56507	-	-	pos	-	-	-	-	Lipids and lipid-like molecules	Fatty Acyls	452.153	0.00861649937511	47.3	-5.50209	-	Fatty acyl glycosides	3.5559995427099995	3.65751	3.72454	4.39293	4.405072146419999	4.37541	3.79945	3.72549	3.78209
pos_2483	Symplocoside	-	metab_2429	B(i)	59.7	0	Flavonoids	类黄酮	Flavonoid glycosides	黄酮糖苷	C18	Secondary metabolite	-	-	LMPK12020110	M+H	C22H26O11	3.56507	-	-	pos	-	-	-	-	-	-	467.155	0.00455335896695	51.2	-0.169423	-	-	2.59954	2.96264	3.06209	2.4826733416900004	2.6210006804900003	2.49043	2.56212	2.71347	2.56052
pos_2486	Luteolin 7-O-(6''-malonylglucoside)	-	metab_2432	B(i)	92.2	0	Flavonoids	类黄酮	Flavonoid glycosides	黄酮糖苷	C18	Secondary metabolite	-	-	HMDB0301681;LMPK12110636	M+H	C24H22O14	3.56507	-	C10103	pos	-	-	-	-	Phenylpropanoids and polyketides	Flavonoids	535.108	0.00194321961617	58	0.194707620598888	98767-38-5	Flavonoid glycosides	1.44687	1.45119	1.4603	2.78015	2.4955300515400003	2.24046	5.66495	5.66441	5.66225
pos_2501	Alpha-cehc	-	metab_2447	B(i)	38.6	0	Others	其他类	Benzopyrans	苯骈吡喃类	C18	Others	-	-	HMDB0001518	M+H	C16H22O4	3.5881	-	-	pos	-	-	-	-	Organoheterocyclic compounds	Benzopyrans	279.159	0.000682655266753	47	-0.0264191	4072-32-6	1-benzopyrans	4.4485	4.461803259690001	4.43623	4.45525	4.4244	4.45363	4.4826	4.51295	4.52139
pos_2502	Val-Gly-Leu	-	metab_2448	B(i)	79.2	0	Others	其他类	Others	其他类	C18	Others	-	-	-	M+H	C13H25N3O4	3.5881	-	-	pos	-	-	-	-	-	-	288.192	0.00107647331926	55	-0.104849	-	-	4.2557	4.27185	4.26811	4.3472308571800005	4.35655	4.36524	4.3887156580300015	4.39895	4.39352
pos_2504	6-Hydroxydihydrodaidzein	6 -羟基二氢大豆苷元	metab_2450	B(ii)	0	70.5	Flavonoids	类黄酮	Isoflavones	异黄酮	C18	Secondary metabolite	-	-	HMDB0041698	M+CH3OH+H	C15H12O5	3.5881	-	C22580	pos	-	-	-	-	Phenylpropanoids and polyketides	Isoflavonoids	305.102	0.0029488173755799997	53.4	-0.534268	94105-87-0	Isoflavans	1.68422	2.24615	2.04802	2.70413	2.39607	1.9992161364900003	2.97885	2.94017	2.7169432381400003
pos_2505	Neryl glucoside	-	metab_2451	B(ii)	0	52.1	Terpenoids	萜类	Other terpenoids	其他萜类	C18	Secondary metabolite	-	-	HMDB0029346	M+H	C16H28O6	3.5881	-	-	pos	-	-	-	-	Lipids and lipid-like molecules	Prenol lipids	317.196	0.00436060725344	46.9	-0.433894	22850-13-1	Terpene glycosides	1.83257	1.83698	1.84628	1.94018	1.92837	1.93477	1.93326	1.93708	1.93058
pos_2531	(S)-Tetraphyllin A	-	metab_2475	B(i)	79.4	0	Carbohydrates and derivatives	碳水化合物及其衍生物	Glycosides	糖苷类	C18	Primary metabolite	-	-	-	M+H	C12H17NO6	3.61097	-	-	pos	-	-	-	-	-	-	272.11280527599996	0.0036970570594699994	55.4	-0.215501	-	-	3.88106	3.85027	3.83304	4.046469093580002	4.07108	4.02733	3.72612	3.7142	3.72264
pos_2535	Asp-Val-Leu	-	metab_2479	B(i)	72.8	0	Amino acids and derivatives	氨基酸及其衍生物	Other peptides	其他肽	C18	Primary metabolite	-	-	-	M+H	C15H27N3O6	3.61097	-	-	pos	-	-	-	-	-	-	346.197	0.0009462793135280001	51.5	0.0415880091475039	-	-	4.02403	4.0908	4.0421418666000015	4.0983748550599985	4.08164	4.06762	4.23949	4.22173	4.21996
pos_2536	Alpha-(1,2-Dihydroxyethyl)-1,2,3,4-tetrahydro-7-hydroxy-9-methoxy-3,4-dioxocyclopenta[c][1]benzopyran-6-acetaldehyde	-	metab_2480	B(ii)	0	58.2	Coumarins and derivatives	香豆素类及其衍生物	Coumarins and derivatives	香豆素类及其衍生物	C18	Secondary metabolite	-	-	HMDB0062442	M+H	C17H16O8	3.61097	-	C19592	pos	-	-	-	-	Phenylpropanoids and polyketides	Coumarins and derivatives	349.092	0.0008176258763730001	51	-0.188536	-	Not Available	1.7518876373400003	2.40864	2.18806	3.2079511373000003	3.18556	3.0326	2.1683232939900003	1.85611	2.05341
pos_2537	Val-Gln-Ile	-	metab_2481	B(i)	88.7	0	Others	其他类	Others	其他类	C18	Others	-	-	-	M+H	C16H30N4O5	3.61097	-	-	pos	-	-	-	-	-	-	359.22879870699995	0.0035026820925700003	56.4	-0.273027	-	-	4.073451519690002	4.05823	4.06261	4.1694	4.17131	4.1631	4.35812	4.3423906691199985	4.33235
pos_2539	Pro-Ile-Tyr	-	metab_2483	B(i)	43.9	0	Others	其他类	Others	其他类	C18	Others	-	-	-	M+H	C20H29N3O5	3.61097	-	-	pos	-	-	-	-	-	-	392.21802528800004	0.0014016960015699998	47.7	0.0710963383981302	-	-	3.70906	3.63263	3.68039	3.6335	3.64041	3.63234	3.63322	3.63281	3.69257
pos_2553	5,7-dimethoxycoumarin	5,7-二甲氧基香豆素	metab_2497	B(i)	42.7	0	Coumarins and derivatives	香豆素类及其衍生物	Coumarins and derivatives	香豆素类及其衍生物	C18	Secondary metabolite	-	-	HMDB0032952	M+H	C11H10O4	3.63387	-	-	pos	-	-	-	-	Phenylpropanoids and polyketides	Coumarins and derivatives	207.06521616400002	0.00156220090405	48.2	0.150118996770719	487-06-9	Not Available	3.97521	3.94582	3.94446	5.65683	5.677	5.64277	5.161366910930001	5.19076	5.189218887809999
pos_2555	Massarigenin B	-	metab_2499	B(i)	93.7	0	Others	其他类	Others	其他类	C18	Others	-	-	-	M+H	C11H14O5	3.63387	-	-	pos	-	-	-	-	-	-	227.091	0.00418304789474	58.1	0.193362542442085	-	-	4.2712	4.31285	4.28759	3.68148	3.69151	3.65533	3.5575470203800004	3.57073	3.52035
pos_2557	Gamma-Glutamyl-S-(1-propenyl)cysteine sulfoxide	-	metab_2501	B(ii)	0	60.3	Amino acids and derivatives	氨基酸及其衍生物	Dipeptides	二肽	C18	Primary metabolite	-	-	HMDB0031870	M+H-2H2O	C11H18N2O6S	3.63387	-	-	pos	-	-	-	-	Organic acids and derivatives	Carboxylic acids and derivatives	271.075	0.0026291195910100006	50.4	-0.113268	-	Amino acids, peptides, and analogues	3.85914	3.8455	3.84769	3.79581	3.77703	3.71501	3.5882129699000003	3.62126	3.65566
pos_2563	Khelloside	-	metab_2507	B(i)	45	0	Others	其他类	Benzopyrans	苯骈吡喃类	C18	Others	-	-	-	M+H	C19H20O10	3.63387	-	C09011	pos	-	-	-	-	-	-	409.11	0.0038860524238899996	46.9	-5.94435	17226-75-4	-	3.82543	3.82048	3.85247	5.23319	5.2554	5.2032250415800005	4.6732654599900005	4.68959	4.71221
pos_2572	Kaempferol 3-(sinapoylglucoside) 7-sophoroside	山奈酚3-（芥子酰基葡萄糖苷）7-槐苷	metab_2516	B(ii)	0	80.8	Flavonoids	类黄酮	Flavonoid glycosides	黄酮糖苷	C18	Secondary metabolite	-	-	HMDB0038770	M+H	C44H50O25	3.63387	-	-	pos	-	-	-	-	Phenylpropanoids and polyketides	Flavonoids	979.271	0.00164842967499	55.7	-0.442352	112208-89-6	Flavonoid glycosides	1.05806	1.06214	1.07078	5.4770529638199985	5.44374	5.426040261209999	6.427642519859999	6.4199	6.42682
pos_2574	4-Hydroxymandelic acid	-	metab_2518	B(i)	37.3	0	Others	其他类	Others	其他类	C18	Others	-	-	HMDB0000822	M+H	C8H8O4	3.65698	-	C11527	pos	-	-	-	-	Benzenoids	Phenols	169.05	0.00173268306006	46.9	-0.190517	1198-84-1	1-hydroxy-2-unsubstituted benzenoids	2.95369	3.0143456308700003	3.00399	3.23482	3.23662	3.2867	4.44271	4.44053	4.48071
pos_2584	Asp-Glu-Met	-	metab_2528	B(i)	49.6	0	Others	其他类	Others	其他类	C18	Others	-	-	-	M+CH3OH+Na	C14H23N3O8S	3.65698	-	-	pos	-	-	-	-	-	-	448.13826755300005	0.00177348303514	47.7	5.804439889406919	-	-	2.41301	2.41747	2.42688	2.52167	2.50976	2.51622	2.51469	2.51854	2.51199
pos_2588	(-)-Epicatechin 3'-O-glucuronide	（-）-表儿茶素3'-O-葡萄糖醛酸苷	metab_2532	B(ii)	0	73.3	Flavonoids	类黄酮	Flavonoid glycosides	黄酮糖苷	C18	Secondary metabolite	-	-	HMDB0041728	M+CH3OH+Na	C21H22O12	3.65698	-	-	pos	-	-	-	-	Phenylpropanoids and polyketides	Flavonoids	521.129	0.0021106024722600003	53	5.87212698760666	-	Flavonoid glycosides	2.41815	2.4226	2.43201	2.52681	2.5149	2.52136	2.51983	2.67031	2.51713
pos_2602	Tyr-Phe	-	metab_2544	B(i)	76.4	0	Amino acids and derivatives	氨基酸及其衍生物	Dipeptides	二肽	C18	Primary metabolite	-	-	HMDB0029112	M+H	C18H20N2O4	3.6799	-	-	pos	-	-	-	-	Organic acids and derivatives	Carboxylic acids and derivatives	329.149	0.000766994418112	54.3	-0.271488	-	Amino acids, peptides, and analogues	4.2555	4.22468	4.22321	4.30766	4.31503	4.29436	4.40774	4.41283	4.44182
pos_2609	Prim-o-glucosylcimifugin	-	metab_2551	B(i)	48	0	Others	其他类	Benzopyrans	苯骈吡喃类	C18	Others	-	-	HMDB0256772	M+H	C22H28O11	3.6799	-	-	pos	-	-	-	-	Organoheterocyclic compounds	Benzopyrans	469.168	0.00401948066237	47.6	-5.18664	-	1-benzopyrans	3.81543	3.71529	3.7159	3.92586	3.95724	3.89547	3.87592	3.94813	3.9593828591199993
pos_2611	Myricetin 4'-methyl ether 3-O-beta-D-galactopyranoside	-	metab_2553	B(i)	50.8	0	Flavonoids	类黄酮	Flavonoid glycosides	黄酮糖苷	C18	Secondary metabolite	-	-	LMPK12112500	M+H	C22H22O13	3.6799	-	-	pos	-	-	-	-	-	-	495.11333367099996	0.00206544659182	49.5	0.0333509959367758	-	-	1.18519	1.18938	1.19822	1.2878803922700002	1.27656	1.2827	1.28125	1.28491	1.27868
pos_2620	P-Xylene	-	metab_2562	B(ii)	0	44.3	Others	其他类	Others	其他类	C18	Others	map01100	Metabolic pathways	HMDB0059924	M+H	C8H10	3.70252	代谢途径	C06756	pos	-	-	Metabolism	Global and overview maps	Benzenoids	Benzene and substituted derivatives	107.086	0.00169444988576	47.7	2.9250438472086002	106-42-3	Xylenes	3.64736	3.66886	3.67115	3.95345	3.93258	3.9560658910300006	3.84469	3.89626	3.86937
pos_2621	1,4-Cyclohexanedione	1，4-环己二酮	metab_2563	B(i)	71.3	0	Others	其他类	Ketones and derivatives	酮类及其衍生物	C18	Others	-	-	-	M+H	C6H8O2	3.70252	-	C08063	pos	-	-	-	-	-	-	113.05995206200001	0.00060331614574	53.1	2.19659614612859	637-88-7	-	3.32569	3.32671	3.32001	3.62986	3.60589	3.57633	3.54636	3.62306	3.57521
pos_2622	Allyl hexanoate	-	metab_2564	B(i)	43.1	0	Lipids	脂质	Fatty Acyls	脂肪酰类	C18	Primary metabolite	-	-	HMDB0040210	M+H-2H2O	C9H16O2	3.70252	-	-	pos	-	-	-	-	Lipids and lipid-like molecules	Fatty Acyls	121.10133601700001	0.00128469710516	47.1	1.01979239432688	123-68-2	Fatty acid esters	3.33203	3.33238	3.27974	3.6430520191300007	3.62674	3.64651	3.57038	3.61679	3.59065
pos_2625	Dehydrocarvacrol	-	metab_2567	B(i)	91.7	0	Others	其他类	Others	其他类	C18	Others	-	-	-	M+H	C10H12O	3.70252	-	-	pos	-	-	-	-	-	-	149.09610842799998	0.0006165754045160001	58	0.11474146545830301	-	-	3.84218	3.81377	3.82107	4.22358	4.22601	4.20067	4.15434	4.1799	4.1778
pos_2626	Trinoranastreptene	-	metab_2568	B(i)	92.7	0	Others	其他类	Hydrocarbons and derivatives	烃类及其衍生物	C18	Others	-	-	-	M+H	C12H16	3.70252	-	-	pos	-	-	-	-	-	-	161.13244664799998	0.000601447496502	57	-0.18921	-	-	3.5623627688300004	3.57891	3.53212	3.93108	3.97496	3.94707	3.92141	3.96241	3.93375
pos_2628	Jasmone	-	metab_2570	B(i)	86.5	0	Others	其他类	Ketones and derivatives	酮类及其衍生物	C18	Others	-	-	HMDB0035601	M+H	C11H16O	3.70252	-	C08490	pos	-	-	-	-	Organic oxygen compounds	Organooxygen compounds	165.127	0.00011142179408399999	56.8	0.0157578359889963	488-10-8	Carbonyl compounds	3.46398	3.48796	3.46479	3.91954	3.95232	3.90633	3.86496	3.87176	3.8968594959300007
pos_2629	2-Butyl-3-phenyl-2-propen-1-al	2-丁基-3-苯基-2-丙烯-1-Al	metab_2571	B(ii)	0	52.4	Others	其他类	Aldehydes and derivatives	醛类及其衍生物	C18	Others	-	-	HMDB0037292	M+H	C13H16O	3.70252	-	-	pos	-	-	-	-	Phenylpropanoids and polyketides	Cinnamaldehydes	189.127	0.000563146779885	50.1	-0.272814	7492-44-6	Not Available	3.78795	3.74504	3.76231	4.37196	4.390757226680002	4.3639927941600005	4.20519	4.2405	4.21808
pos_2633	Val-Trp	-	metab_2575	B(i)	93.1	0	Others	其他类	Others	其他类	C18	Others	-	-	HMDB0029138	M+H	C16H21N3O3	3.70252	-	-	pos	-	-	-	-	Organic acids and derivatives	Carboxylic acids and derivatives	304.165	0.00150219747512	57.6	-0.662075	24587-37-9	Amino acids, peptides, and analogues	4.4996845616500005	4.49284	4.488745617619999	4.62862	4.62028	4.58317	4.69205	4.70154	4.69739
pos_2649	3-Coumaric acid	3-香豆酸	metab_2591	B(i)	97.9	0	Phenolic acids and derivatives	酚酸类及其衍生物	Cinnamic acids and derivatives	肉桂酸及其衍生物	C18	Secondary metabolite	-	-	-	M+H-H2O	C9H8O3	3.7253	-	-	pos	-	-	-	-	-	-	147.044	0.0013324995564200001	59.3	-0.0559895	-	-	3.54191	3.5138195961500003	3.52434	4.31286	4.30869	4.30568	3.84744	3.82924	3.81971
pos_2650	1,4-Ipomeadiol	1,4-异甲二醇	metab_2592	B(ii)	0	62	Others	其他类	Others	其他类	C18	Others	-	-	HMDB0030471	M+H-H2O	C9H14O3	3.7253	-	-	pos	-	-	-	-	Organoheterocyclic compounds	Heteroaromatic compounds	153.091	0.0012656677216500002	51.2	-0.000567259	53011-73-7	Not Available	3.48107	3.50598	3.5048	3.57206	3.53781	3.56336	3.5872297528099995	3.61707	3.645071826030001
pos_2655	3-Hydroxy-beta-ionone	3-羟基-β-紫罗兰酮	metab_2597	B(i)	93.1	0	Terpenoids	萜类	Sesquiterpenoids	倍半萜	C18	Secondary metabolite	-	-	HMDB0036821	M+H	C13H20O2	3.7253	-	-	pos	-	-	-	-	Lipids and lipid-like molecules	Prenol lipids	209.154	0.00106234749063	58.1	-0.471626	50281-38-4	Sesquiterpenoids	4.6695	4.66982	4.66345	4.73755	4.72913	4.71109	4.62449	4.6230259591000005	4.66149
pos_2659	Luteolinidin	木樨黄定	metab_2601	B(i)	44.8	0	Flavonoids	类黄酮	Other flavonoids	其他类黄酮	C18	Secondary metabolite	-	-	HMDB0029249	M+H	C15H10O5	3.7253	-	C08652	pos	-	-	-	-	Phenylpropanoids and polyketides	Flavonoids	271.06	0.005712023141310001	47.9	-0.337822	1154-78-5	Hydroxyflavonoids	3.36785	3.26691	3.24576	3.07052	2.96198	2.89558	3.14107	3.1394	3.03272
pos_2660	2-hydroxyisoflavanone naringenin	2 -羟基异黄酮柚皮素	metab_2602	B(ii)	0	73.6	Flavonoids	类黄酮	Isoflavones	异黄酮	C18	Secondary metabolite	map00943;map01100;map01110	Isoflavonoid biosynthesis;Metabolic pathways;Biosynthesis of secondary metabolites	HMDB0304071	M+H	C15H12O6	3.7253	异黄酮生物合成;代谢途径;次级代谢产物的生物合成	C12631	pos	-	-	Metabolism;Metabolism;Metabolism	Biosynthesis of other secondary metabolites;Global and overview maps;Global and overview maps	Phenylpropanoids and polyketides	Isoflavonoids	289.07	0.00252314154429	54	-0.862955	-	Isoflavans	3.3180815647099995	3.31649	3.21573	4.00619	3.99587	3.97493	3.45266	3.45103	3.50764
pos_2665	6-(9'-Purine-6',8'-diolyl)-2beta-suberosanone	-	metab_2607	B(i)	75.9	0	Terpenoids	萜类	Diterpenoids	二萜	C18	Secondary metabolite	-	-	-	M+H	C20H26N4O3	3.7253	-	-	pos	-	-	-	-	-	-	371.207	0.0018146908563399999	53.2	-3.09901	-	-	3.94844	3.9922759815400006	3.94792	3.76004	3.8133	3.7216	4.01698	4.03367	4.04225
pos_2667	Okanin-4'-o-glucoside	-	metab_2609	B(i)	50	0	Flavonoids	类黄酮	Flavonoid glycosides	黄酮糖苷	C18	Secondary metabolite	-	-	-	M+H	C21H22O11	3.7253	-	-	pos	-	-	-	-	-	-	451.123	0.00156281447791	49.7	-0.39619	-	-	3.1175162447000004	3.18038	3.16512	3.267	3.3526759579000003	3.3462496291400003	3.91823	3.9564328565199993	3.95627
pos_2674	Quercetin 3-glucoside 7-xyloside	槲皮素3 -葡萄糖苷7 -木糖苷	metab_2616	B(ii)	0	65.5	Flavonoids	类黄酮	Flavonoid glycosides	黄酮糖苷	C18	Secondary metabolite	-	-	HMDB0037364	M+CH3OH+Na	C26H28O16	3.7253	-	-	pos	-	-	-	-	Phenylpropanoids and polyketides	Flavonoids	651.1544488430001	0.0077053220551100005	52.2	2.20424301418491	79592-61-3	Flavonoid glycosides	1.0865	1.09061	1.0992980524299998	1.1875581348100002	1.1764	1.18245	3.42323	3.52308	3.5151072291199994
pos_2681	Leu-Ile	-	metab_2623	B(i)	61.4	0	Amino acids and derivatives	氨基酸及其衍生物	Dipeptides	二肽	C18	Primary metabolite	-	-	HMDB0028932	M+H	C12H24N2O3	3.74742	-	-	pos	-	-	-	-	Organic acids and derivatives	Carboxylic acids and derivatives	245.186	0.000566073260444	51.6	-0.825925	-	Amino acids, peptides, and analogues	5.4306	5.42861	5.423106509709999	5.43856	5.44467	5.40404	5.473596636240001	5.478130322899999	5.493680100240001
pos_2684	Tectorigenin	-	metab_2626	B(ii)	0	70.1	Flavonoids	类黄酮	Isoflavones	异黄酮	C18	Secondary metabolite	-	-	HMDB0042024	M+H-H2O	C16H12O6	3.74742	-	C10534	pos	-	-	-	-	Phenylpropanoids and polyketides	Isoflavonoids	283.06	0.00216498507019	53.1	-0.519443	548-77-6	Isoflav-2-enes	4.63094	4.62262	4.60536	4.374248840369999	4.3747	4.31354	4.15493	4.15834	4.14746
pos_2695	Apigenin 7-O-(6''-O-acetylglucoside)	芹菜素7-O-（6''-O-乙酰葡糖苷）	metab_2637	B(ii)	0	71.2	Flavonoids	类黄酮	Flavonoid glycosides	黄酮糖苷	C18	Secondary metabolite	-	-	HMDB0037342	M+H	C23H22O11	3.74742	-	-	pos	-	-	-	-	Phenylpropanoids and polyketides	Flavonoids	475.12336650699996	0.00346814215065	52.5	-0.256153	72741-92-5	Flavonoid glycosides	4.395369754830002	4.389804794680002	4.37412	4.12559	4.04829	4.03795	3.88971	3.94713	3.91093
pos_2705	Gamma-undecalactone	-	metab_2647	B(i)	50.5	0	Others	其他类	Others	其他类	C18	Others	-	-	LMFA07040030	M+H	C11H20O2	3.7696	-	C08571	pos	-	-	-	-	-	-	185.154	0.00225797620266	49.2	-0.159897	104-67-6	-	3.09135	3.20291	3.06483	3.2745642650700004	3.18949	3.2542	3.1415853847000004	3.21903	3.23007
pos_2706	Humuladienone	葎草二烯酮	metab_2648	B(ii)	0	68.1	Terpenoids	萜类	Sesquiterpenoids	倍半萜	C18	Secondary metabolite	-	-	HMDB0038208	M+H	C15H24O	3.7696	-	-	pos	-	-	-	-	Lipids and lipid-like molecules	Prenol lipids	221.19	0.010137411690700001	53.1	-0.383609	24405-90-1	Sesquiterpenoids	2.66897	2.7639757997400003	2.84627	2.60835	2.34241	2.48963	2.78676	2.43318	2.72419
pos_2709	6-GlcO-I3CO2H	-	metab_2651	B(i)	80.1	0	Carbohydrates and derivatives	碳水化合物及其衍生物	Glycosides	糖苷类	C18	Primary metabolite	-	-	-	M+H	C15H17NO8	3.7696	-	-	pos	-	-	-	-	-	-	340.102	0.00222167719106	54.8	-0.643932	-	-	3.74165	3.71952	3.74306	3.87484	3.82168	3.82899	3.90783	3.97612	3.98876
pos_2710	Grevilloside B	-	metab_2652	B(i)	68.5	0	Carbohydrates and derivatives	碳水化合物及其衍生物	Glycosides	糖苷类	C18	Primary metabolite	-	-	-	M+H	C17H26O8	3.7696	-	-	pos	-	-	-	-	-	-	359.17	0.00289045250855	52.3	-0.937705	-	-	2.85262	2.50279	2.7593	4.27462	4.25357	4.27792	3.77668	3.84118	3.77298
pos_2721	1,4-naphthoquinone	-	metab_2663	B(i)	93	0	Quinones	醌类	Naphthoquinones	萘醌	C18	Secondary metabolite	-	-	HMDB0244221	M+H	C10H6O2	3.79203	-	C02617	pos	-	-	-	-	Benzenoids	Naphthalenes	159.044	0.00113643476245	58.3	-0.444395	130-15-4	Naphthoquinones	3.87805	3.89309	3.85352	4.41417	4.397864126559998	4.38915	3.74326	3.77129	3.75099
pos_2722	1,2-Dihydroxy-8-carboxynaphthalene	-	metab_2664	B(i)	62.5	0	Organic acids and derivatives	有机酸及其衍生物	Organic acids and derivatives	有机酸及其衍生物	C18	Secondary metabolite	-	-	-	M+H	C11H8O4	3.79203	-	C14093	pos	-	-	-	-	-	-	205.04942686400003	0.00310044180945	51.9	-0.530788	162794-82-3	-	3.36275	3.3875	3.2893088890599995	3.78684	3.7926393527699993	3.79045	3.19916	3.1632749184099995	3.23673
pos_2726	4-Feruloyl-1,5-quinolactone	4-阿魏酰-1,5-喹啉内酯	metab_2668	B(ii)	0	56.2	Phenolic acids and derivatives	酚酸类及其衍生物	Cinnamic acids and derivatives	肉桂酸及其衍生物	C18	Secondary metabolite	-	-	HMDB0029290	M+H	C17H18O8	3.79203	-	-	pos	-	-	-	-	Phenylpropanoids and polyketides	Cinnamic acids and derivatives	351.107	0.0007940629808119999	50.2	-0.961072	-	Hydroxycinnamic acids and derivatives	4.6902499759400005	4.720927057830001	4.68745	5.21782	5.22471	5.20529	4.87831	4.86907	4.881024914469999
pos_2738	3-Hydroxy-1-indanone	-	metab_2679	B(i)	79.6	0	Others	其他类	Others	其他类	C18	Others	-	-	-	M+H	C9H8O2	3.8142	-	C07720	pos	-	-	-	-	-	-	149.06	0.00709110200203	54.9	-0.10906	26976-59-0	-	2.9444747829000004	2.9139	2.81489	2.8827674454100003	2.86071	2.9673704086900003	2.94299	2.89521	2.87414
pos_2739	4-Methylumbelliferone	4-甲基伞形酮	metab_2680	B(i)	97.2	0	Coumarins and derivatives	香豆素类及其衍生物	Coumarins and derivatives	香豆素类及其衍生物	C18	Secondary metabolite	-	-	HMDB0059622	M+H	C10H8O3	3.8142	-	C03081	pos	-	-	-	-	Phenylpropanoids and polyketides	Coumarins and derivatives	177.05454879299998	0.0011732940921600002	59	-0.407585	90-33-5	Hydroxycoumarins	3.4385	3.4025	3.40903	4.06332	4.03184	4.06332	3.82859	3.83995	3.8924
pos_2745	Dibenzo-18-crown-6	二苯并-18-冠-6-醚	metab_2686	B(ii)	0	41.5	Others	其他类	Ethers	醚类	C18	Others	-	-	HMDB0251162	M+NH4	C20H24O6	3.8142	-	C14289	pos	-	-	-	-	Organic oxygen compounds	Organooxygen compounds	378.191	0.0019508212030099998	47.5	-0.586527	14187-32-7	Ethers	6.83438	6.82809	6.85822	6.81037	6.81162	6.79604	6.63456	6.6457	6.6435190223500005
pos_2746	Homoorientin	异荭草苷	metab_2687	B(i)	98.8	0	Flavonoids	类黄酮	Flavonoid glycosides	黄酮糖苷	C18	Secondary metabolite	-	-	HMDB0301981	M+H	C21H20O11	3.8142	-	C01821	pos	-	-	-	-	Phenylpropanoids and polyketides	Flavonoids	449.108	0.00365515843501	58.6	-0.599559	4261-42-1	Flavonoid glycosides	3.3856245642400005	3.3213	3.4334495892400003	4.92535	4.8987	4.90139	5.5985291764300005	5.61706	5.63451
pos_2747	4'-O-Methylepicatechin 7-O-glucuronide	4 ' - O -甲基表儿茶素7 - O -葡萄糖醛酸苷	metab_2688	B(ii)	0	40.7	Flavonoids	类黄酮	Flavonoid glycosides	黄酮糖苷	C18	Secondary metabolite	-	-	HMDB0029183	M+H	C22H24O12	3.8142	-	-	pos	-	-	-	-	Phenylpropanoids and polyketides	Flavonoids	481.134	0.00193586837725	47.5	-1.01093	603133-93-3	Flavonoid glycosides	3.50465	2.77282	3.09635	3.86645	3.74602	3.74749	3.71201	3.7178	3.83716
pos_2753	Quercetin 3-(2-caffeoylsophoroside) 7-glucoside	槲皮素3-（2-咖啡酰基磷酸苷）7-葡萄糖苷	metab_2693	B(ii)	0	77.9	Flavonoids	类黄酮	Flavonoid glycosides	黄酮糖苷	C18	Secondary metabolite	-	-	HMDB0040841	M+CH3OH+Na	C42H46O25	3.8142	-	-	pos	-	-	-	-	Phenylpropanoids and polyketides	Flavonoids	1005.25	0.00911631879596	54.4	1.32645577365662	151649-67-1	Flavonoid glycosides	2.57805	2.58251	2.59193	4.417967759840001	4.419482585369999	4.40246	4.65971	4.69333	4.68915
pos_2761	Neohesperidin dihydrochalcone	新橙皮苷二氢查耳酮	metab_2701	B(ii)	0	53.5	Flavonoids	类黄酮	Flavonoid glycosides	黄酮糖苷	C18	Secondary metabolite	-	-	HMDB0030542	M+ACN+Na	C28H36O15	3.83657	-	-	pos	-	-	-	-	Phenylpropanoids and polyketides	Flavonoids	676.224	0.00317150868379	49	4.1131129145639695	20702-77-6	Flavones	4.50693	4.46877	4.5007	4.979134848999999	5.02419	5.01989	4.20442	4.1703699483099985	4.20307
pos_2766	Beta-Dolabrin	-	metab_2705	B(i)	42.8	0	Others	其他类	Others	其他类	C18	Others	-	-	LMPR0102110001	M+H	C10H10O2	3.8589666666699998	-	-	pos	-	-	-	-	-	-	163.075	0.00112237552075	46.5	-0.388184	-	-	3.54123	3.56648	3.51769	3.61086	3.50389	3.61704	3.50044	3.47125	3.5357669845199995
pos_2769	Pratenol A	-	metab_2708	B(ii)	0	54.9	Others	其他类	Benzopyrans	苯骈吡喃类	C18	Others	-	-	HMDB0040630	M+H	C14H12O5	3.8589666666699998	-	-	pos	-	-	-	-	Organoheterocyclic compounds	Benzopyrans	261.076	0.005297816377600001	50	-0.671089	147838-41-3	1-benzopyrans	0.0941198082557	0.0949951004908	0.0968666791179	1.739	1.75574	1.72234	0.11597	0.116878	0.115336
pos_2771	5-Fluorouridine	5 -氟脲苷	metab_2710	B(ii)	0	55.6	Nucleotides and derivatives	核苷酸及其衍生物	Nucleotides and derivatives	核苷酸及其衍生物	C18	Primary metabolite	-	-	HMDB0060396	M+CH3OH+H	C9H11FN2O6	3.8589666666699998	-	C16633	pos	-	-	-	-	Nucleosides, nucleotides, and analogues	Pyrimidine nucleosides	295.092	0.00952851189639	49.3	-4.40877	316-46-1	Not Available	0.0917902234339	0.09264608093689998	0.0944762318644	2.5704149926900004	0.112036	0.113518	0.113166	2.2263002173400004	2.28743
pos_2774	Gly-Asn-Arg	-	metab_2713	B(i)	41.7	0	Others	其他类	Others	其他类	C18	Others	-	-	-	M+H	C12H23N7O5	3.8589666666699998	-	-	pos	-	-	-	-	-	-	346.186	0.00172551528353	46.3	7.22369084679076	-	-	2.37285	2.34637	2.6449	3.2113501924400003	3.21459	3.15028	2.178	2.0226453167200003	2.77445
pos_2776	Khellol glucoside	凯诺醇糖苷	metab_2714	B(i)	40	0	Others	其他类	Benzopyrans	苯骈吡喃类	C18	Others	-	-	-	M+H	C19H20O10	3.8589666666699998	-	C09011	pos	-	-	-	-	-	-	409.11	0.0044309298199499995	45.4	-6.78803	17226-75-4	-	4.48274	4.4911	4.473741689180001	5.13652	5.18036	5.14241	4.84958	4.81822	4.83769
pos_2791	Aspirin	阿司匹林	metab_2727	B(i)	86.3	0	Phenolic acids and derivatives	酚酸类及其衍生物	Benzoic acids and derivatives	苯甲酸及其衍生物	C18	Secondary metabolite	-	-	HMDB0001879;PW_C001251	M+H	C9H8O4	3.88197	-	C01405	pos	-	-	-	-	Benzenoids	Benzene and substituted derivatives	181.04940884099997	0.00360814222779	56.6	-0.701646	50-78-2	Benzoic acids and derivatives	3.3309675048500003	3.38632	3.3533070467900004	3.72776	3.77167	3.7283580233699993	3.6005	3.59823	3.6008017465300006
pos_2801	Theviridoside	黄夹苦苷	metab_2737	B(i)	36.6	0	Terpenoids	萜类	Other terpenoids	其他萜类	C18	Secondary metabolite	-	-	-	M+H-2H2O	C17H24O11	3.88197	-	-	pos	-	-	-	-	-	-	369.118	0.0013279938543900001	46.3	0.342613236680099	-	-	4.85953	4.87617	4.85883	5.45783	5.48495	5.45276	5.149238478480001	5.14252	5.15663
pos_2829	Gln-Leu-Leu	-	metab_2764	B(i)	93.6	0	Others	其他类	Others	其他类	C18	Others	-	-	-	M+H	C17H32N4O5	3.90467	-	-	pos	-	-	-	-	-	-	373.244	0.00114328764777	57.5	-0.157494	-	-	4.56154	4.57892	4.59414	4.46121	4.47659	4.45666	4.49388	4.506509111140001	4.52812
pos_2839	Quercetin 3,4'-o-diglucoside	-	metab_2774	B(i)	79.7	0	Flavonoids	类黄酮	Flavonoid glycosides	黄酮糖苷	C18	Secondary metabolite	-	-	HMDB0304728	M+H	C27H30O17	3.90467	-	-	pos	-	-	-	-	Phenylpropanoids and polyketides	Flavonoids	627.1563002319999	0.027947533813800003	54.3	1.1567633965447	-	Biflavonoids and polyflavonoids	0.08042155665789999	0.20953	0.0828057	2.96613	3.25875	3.1998735121900004	4.89819	4.8583	4.85697
pos_2843	(-)-Carvone	-	metab_2778	B(i)	86.8	0	Terpenoids	萜类	Monoterpenoids	单萜	C18	Secondary metabolite	map00902	Monoterpenoid biosynthesis	HMDB0035089;LMPR0102090007	M+H	C10H14O	3.92738	单萜生物合成	C01767	pos	-	-	Metabolism	Metabolism of terpenoids and polyketides	Lipids and lipid-like molecules	Prenol lipids	151.11174113299998	0.00068564267626	56.7	-0.0024466	6485-40-1	Monoterpenoids	4.16852	4.15596	4.132302738440002	4.30628	4.30915	4.31125	4.31255	4.2939315997800005	4.29858
pos_2848	(+)-4,5-Didehydrojasmonic acid	-	metab_2783	B(i)	91.2	0	Others	其他类	Ketones and derivatives	酮类及其衍生物	C18	Others	-	-	-	M+H	C12H16O3	3.92738	-	-	pos	-	-	-	-	-	-	209.117	0.0033135945126699998	57.4	-0.281184	-	-	4.1326529278900015	4.11409	4.10086	3.76826	3.75462	3.79927	3.637278009140001	3.65613	3.608062920340001
pos_2849	1-Acetoxy-7-hydroxy-3,7-dimethyl-2E,5E-octadien-4-one	-	metab_2784	B(i)	83.8	0	Lipids	脂质	Fatty Acyls	脂肪酰类	C18	Primary metabolite	-	-	-	M+H	C12H18O4	3.92738	-	-	pos	-	-	-	-	-	-	227.12760836099997	0.0021376816471400002	55.8	-0.783329	-	-	4.402445836509999	4.39777	4.3638	4.06808	4.07933	4.04905	3.91581	3.92476	3.97441
pos_2850	3,7,11-Trimethyl-1,4,6,10-dodecatetraene-3,8-diol	-	metab_2785	B(i)	74.9	0	Terpenoids	萜类	Sesquiterpenoids	倍半萜	C18	Secondary metabolite	-	-	-	M+H	C15H24O2	3.92738	-	-	pos	-	-	-	-	-	-	237.185	0.00154024520195	54.3	-0.621577	-	-	3.74987	3.71618	3.72176	3.7586	3.76484	3.79165	3.83015	3.85848	3.86129
pos_2854	Val-Val-Leu	-	metab_2789	B(i)	96.7	0	Amino acids and derivatives	氨基酸及其衍生物	Oligopeptides	寡肽	C18	Primary metabolite	-	-	-	M+H	C16H31N3O4	3.92738	-	-	pos	-	-	-	-	-	-	330.23857284400003	0.00293060127953	58.4	-0.486207	-	-	4.83537	4.8348	4.813497368169999	4.82078	4.83732	4.79757	4.91571	4.91908	4.93678
pos_2867	3-Isopropylcatechol	-	metab_2802	B(i)	92.5	0	Others	其他类	Others	其他类	C18	Others	-	-	-	M+H	C9H12O2	3.9501	-	C01014	pos	-	-	-	-	-	-	153.091	0.0015058984482	58	-0.195891	2138-48-9	-	3.801286744190001	3.81961	3.8046726409300007	3.71733	3.76466	3.70631	3.81596	3.8370971583699993	3.80746
pos_2868	Linalyl propionate	-	metab_2803	B(ii)	0	57.7	Terpenoids	萜类	Monoterpenoids	单萜	C18	Secondary metabolite	-	-	HMDB0030425	M+H-2H2O	C13H22O2	3.9501	-	-	pos	-	-	-	-	Lipids and lipid-like molecules	Prenol lipids	175.148	0.0025124588649400002	51	0.25630421056533703	144-39-8	Monoterpenoids	2.9103	2.92827	2.9341882205900003	3.49885	3.42518	3.4532	3.69345	3.66422	3.69043
pos_2870	(E)-2-Butenyl-4-methyl-threonine	-	metab_2805	B(i)	76.2	0	Amino acids and derivatives	氨基酸及其衍生物	Alpha amino acids and derivatives	Alpha氨基酸及其衍生物	C18	Primary metabolite	-	-	-	M+H	C9H17NO3	3.9501	-	C12029	pos	-	-	-	-	-	-	188.12811931299998	0.00194693473571	53.9	-0.00282053	81135-57-1	-	3.4772	3.46266	3.47502	3.26234	3.26053	3.23504	3.460151503430001	3.4304	3.40722
pos_2871	Beta-Ionone	-	metab_2806	B(ii)	0	40.5	Terpenoids	萜类	Sesquiterpenoids	倍半萜	C18	Secondary metabolite	-	-	HMDB0036565	M+H	C13H20O	3.9501	-	C12287	pos	-	-	-	-	Lipids and lipid-like molecules	Prenol lipids	193.159	0.0016746824335799998	47.7	0.30532143895084995	79-77-6	Sesquiterpenoids	3.2755055321900004	3.214983804690001	3.21794	3.44787	3.41945	3.4945097316300004	3.63765	3.64744	3.63798
pos_2894	3-hydroxycoumarin	-	metab_2828	B(i)	95.1	0	Coumarins and derivatives	香豆素类及其衍生物	Coumarins and derivatives	香豆素类及其衍生物	C18	Secondary metabolite	-	-	HMDB0002149	M+H	C9H6O3	3.97318	-	-	pos	-	-	-	-	Phenylpropanoids and polyketides	Coumarins and derivatives	163.039	0.000690515178881	58.7	-0.341803	939-19-5	Hydroxycoumarins	4.07752	4.079	4.03172	4.04513	3.99973	4.09769	4.13004	4.13615	4.11309
pos_2897	(-)-Taylorione	-	metab_2831	B(i)	77.8	0	Terpenoids	萜类	Sesquiterpenoids	倍半萜	C18	Secondary metabolite	-	-	-	M+H	C15H22O	3.97318	-	-	pos	-	-	-	-	-	-	219.174	0.00178164279334	54.8	-0.371785	-	-	3.88072	3.88599	3.894425880280001	3.90827	3.92385	3.924084949080001	3.99573	3.97989	4.0182568938099985
pos_2906	Glu-Ile-Leu	-	metab_2840	B(i)	88.4	0	Amino acids and derivatives	氨基酸及其衍生物	Oligopeptides	寡肽	C18	Primary metabolite	-	-	-	M+H	C17H31N3O6	3.97318	-	-	pos	-	-	-	-	-	-	374.22842028900004	0.00130046144359	52.5	-0.38012	-	-	4.50412	4.4734352815800005	4.48755	4.32003	4.36893	4.34541	4.35953	4.38773	4.36132
pos_2908	Met-Glu-Ile	-	metab_2842	B(i)	91.1	0	Others	其他类	Others	其他类	C18	Others	-	-	-	M+H	C16H29N3O6S	3.97318	-	-	pos	-	-	-	-	-	-	392.185	0.007490288696569999	55.7	-0.635489	-	-	3.26786	3.12786	3.39535	3.65502	3.62801	3.63383	3.99651	4.05317	4.02239
pos_2911	Isoquercetin	-	metab_2845	B(i)	96.2	0	Flavonoids	类黄酮	Flavonoid glycosides	黄酮糖苷	C18	Secondary metabolite	map01100;map01110;map00944	Metabolic pathways;Biosynthesis of secondary metabolites;Flavone and flavonol biosynthesis	HMDB0037362	M+H	C21H20O12	3.97318	代谢途径;次级代谢产物的生物合成;黄酮和黄酮醇生物合成	C05623	pos	-	-	Metabolism;Metabolism;Metabolism	Global and overview maps;Global and overview maps;Biosynthesis of other secondary metabolites	Phenylpropanoids and polyketides	Flavonoids	465.103	0.008700995020530001	58.2	0.0119646263557198	482-35-9	Flavonoid glycosides	1.03482	1.03888	1.0474717346100002	2.7191480828099994	2.9882475443700005	3.0771	4.5542611205800005	4.52534	4.52703
pos_2926	3-Carboxy-6,7-dihydroxy-1-(3',4'-dihydroxyphenyl)-naphthalene	-	metab_2859	B(i)	56.4	0	Organic acids and derivatives	有机酸及其衍生物	Organic acids and derivatives	有机酸及其衍生物	C18	Secondary metabolite	-	-	-	M+H	C17H12O6	3.9958	-	-	pos	-	-	-	-	-	-	313.069	0.00110212027775	49.5	-4.72217	-	-	5.0974	5.10239	5.09088	4.79537	4.80973	4.80377	4.60265	4.61922	4.633116590169999
pos_2928	Daphnoretin methyl ether	瑞香素甲醚	metab_2861	B(ii)	0	63.9	Coumarins and derivatives	香豆素类及其衍生物	Coumarins and derivatives	香豆素类及其衍生物	C18	Secondary metabolite	-	-	HMDB0039046	M+H	C20H14O7	3.9958	-	-	pos	-	-	-	-	Phenylpropanoids and polyketides	Coumarins and derivatives	367.081	0.0012756008816199999	51.5	0.7144554577210059	3749-38-0	Not Available	4.78536	4.79616	4.7805	4.44011	4.38261	4.409929296830001	4.19687	4.25719	4.24629
pos_2931	Asn-Asp-Tyr	-	metab_2864	B(i)	37.6	0	Others	其他类	Others	其他类	C18	Others	-	-	-	M+	C17H22N4O8	3.9958	-	-	pos	-	-	-	-	-	-	410.144	0.007841108106890001	46.3	1.7558419438242798	-	-	1.94765	1.95208	1.96142	2.05559	2.04375	2.05017	2.13299	2.05249	2.04597
pos_2937	Quercetin 3-O-diglucoside	槲皮素- 3 - O -二葡萄糖苷	metab_2870	B(ii)	0	46.8	Flavonoids	类黄酮	Flavonoid glycosides	黄酮糖苷	C18	Secondary metabolite	-	-	HMDB0301692	M+CH3OH+Na	C27H30O17	3.9958	-	-	pos	-	-	-	-	Phenylpropanoids and polyketides	Flavonoids	681.166	0.0031863490629999995	48.1	2.9454779362404	117-39-5	Flavonoid glycosides	4.866733808869999	4.83357	4.81107	5.565022826769999	5.5758289538199985	5.59791	5.39858	5.415751402740001	5.39141
pos_2939	1-(2-Furanyl)-2-propanone	1-（2-呋喃基）-2-丙酮	metab_2872	B(ii)	0	43.5	Others	其他类	Others	其他类	C18	Others	-	-	HMDB0032917	M+H-H2O	C7H8O2	4.01807	-	-	pos	-	-	-	-	Organoheterocyclic compounds	Heteroaromatic compounds	107.04944131399999	0.0013376927420000002	47.6	2.41888526013367	6975-60-6	Not Available	3.4609574403900005	3.45211	3.47562	3.59987	3.56534	3.58642	3.44287	3.42331	3.4016596050700003
pos_2940	(2-oxo-2,3-Dihydro-1H-Indol-3-yl)acetic Acid	（2-氧代-2,3-二氢-1H-吲哚-3-基）乙酸	metab_2873	B(i)	83.4	0	Indoles and derivatives	吲哚及其衍生物	Indoles and derivatives	吲哚及其衍生物	C18	Secondary metabolite	-	-	-	M+H	C10H9NO3	4.01807	-	-	pos	-	-	-	-	-	-	192.06549455200002	0.0031545415429699995	56.2	-0.131016	-	-	3.2382451597099995	3.22466	3.1927	3.43593	3.46269	3.38991	3.57136	3.52773	3.5585022060400004
pos_2953	Isovitexin 7-O-xyloside	-	metab_2886	B(i)	50.2	0	Flavonoids	类黄酮	Flavonoid glycosides	黄酮糖苷	C18	Secondary metabolite	-	-	LMPK12110286	M+H	C26H28O14	4.01807	-	-	pos	-	-	-	-	-	-	565.155	0.000254172736888	49.9	0.14539797330613402	-	-	7.66213	7.65864	7.64823	7.33203	7.34138	7.34669	7.17559	7.18719	7.20785
pos_2955	(7E,7'R,8'R)-e-Viniferin 3',5'-diglucoside	（7E，7'R，8'R）-e-葡萄糖苷3'，5'-二葡萄糖苷	metab_2888	B(ii)	0	68.2	Flavonoids	类黄酮	Benzofuran flavonoids	苯骈呋喃酮类	C18	Secondary metabolite	-	-	HMDB0036321	M+K	C40H42O16	4.01807	-	-	pos	-	-	-	-	Phenylpropanoids and polyketides	2-arylbenzofuran flavonoids	817.218	0.0016433672777599999	51.1	9.6479131808114	-	Not Available	3.84591	3.84314	3.805311192430001	5.585422325930001	5.61722	5.581	6.79404	6.815675718790001	6.83912
pos_2973	Metyrosine	甲基酪氨酸	metab_2906	B(ii)	0	66.1	Phenolic acids and derivatives	酚酸类及其衍生物	Phenylpropanoic acids and derivatives	苯丙酸及其衍生物	C18	Secondary metabolite	-	-	HMDB0014903	M+H-H2O	C10H13NO3	4.0633	-	C07921	pos	-	-	-	-	Phenylpropanoids and polyketides	Phenylpropanoic acids	178.08622737099998	0.0018358229330600001	52.6	-0.141775	672-87-7	Not Available	3.3867	3.39815	3.37172	3.17659	3.1258	3.1644	4.0295	4.01294	4.02596
pos_2984	Spionoside B	螺苷B	metab_2917	B(i)	43	0	Lipids	脂质	Fatty Acyls	脂肪酰类	C18	Primary metabolite	-	-	-	M+H	C19H30O9	4.0633	-	-	pos	-	-	-	-	-	-	403.19617569400003	0.000839520902742	47.7	-0.207057	-	-	2.05229	1.56362	1.03447	1.2184	1.16138	1.5180522519600002	1.7467999410799997	1.83785	1.1126485027600002
pos_2994	Quercetin 3-(6''-malonylglucoside)-7-glucoside	-	metab_2926	B(i)	85.9	0	Flavonoids	类黄酮	Flavonoid glycosides	黄酮糖苷	C18	Secondary metabolite	-	-	LMPK12112264	M+H	C30H32O20	4.0633	-	-	pos	-	-	-	-	-	-	713.156	0.0019043917219499999	56.8	-0.0456663	-	-	2.4135121714400003	2.41797	2.42738	3.43395	3.38473	3.54455	5.49371	5.502568684550001	5.50913
pos_2997	Tartronate semialdehyde	丙醇二酸半醛	metab_2929	B(ii)	0	42.6	Carbohydrates and derivatives	碳水化合物及其衍生物	Monosaccharides	单糖	C18	Primary metabolite	map01100;map00630;map00053	Metabolic pathways;Glyoxylate and dicarboxylate metabolism;Ascorbate and aldarate metabolism	HMDB0006938	M+H	C3H4O4	4.08542	代谢途径;乙醛酸和二羧酸代谢;抗坏血酸和醛酸代谢	C01146	pos	-	-	Metabolism;Metabolism;Metabolism	Global and overview maps;Carbohydrate metabolism;Carbohydrate metabolism	Organic oxygen compounds	Organooxygen compounds	105.01857182799999	0.0041044546548	47.4	3.23802098440955	2480-77-5	Carbohydrates and carbohydrate conjugates	2.22316	2.1627	2.11283	2.67151	2.76918	2.73565	2.70494	2.66518	2.67663
pos_3001	(rac)-Cyclosordariolone	-	metab_2933	B(i)	76.5	0	Others	其他类	Naphthalenes	萘类	C18	Others	-	-	-	M+NH4	C12H12O4	4.08542	-	-	pos	-	-	-	-	-	-	238.10725531900002	0.00167603366576	54.8	-0.586502	-	-	5.25499	5.271676963469999	5.27062	4.64196	4.65747	4.659121851419999	3.57826	3.59192	3.60119
pos_3007	Gln-Ile-Ile	-	metab_2939	B(i)	90	0	Others	其他类	Others	其他类	C18	Others	-	-	-	M+H	C17H32N4O5	4.08542	-	-	pos	-	-	-	-	-	-	373.24435239699994	0.000393704922122	56.6	-0.521653	-	-	4.66033	4.68773	4.64534	4.94722	4.98128	4.95973	4.96158	4.95226	4.970857003440001
pos_3024	2-Phenylbutyric acid	2-苯基丁酸	metab_2954	B(i)	71.8	0	Others	其他类	Others	其他类	C18	Others	-	-	HMDB0000329	M+H	C10H12O2	4.10823	-	-	pos	-	-	-	-	Benzenoids	Benzene and substituted derivatives	165.091	0.00117198818656	53.1	0.0962690718979178	90-27-7	Phenylpropanes	3.70143	3.73001	3.75285	3.73538	3.72653	3.77179	3.81397	3.79726	3.78233
pos_3038	(7'R,8'R)-4,7'-Epoxy-3',5-dimethoxy-4',9,9'-lignanetriol 9'-glucoside	（7'R，8'R）-4,7'-环氧-3'，5-二甲氧基-4'，9,9'-木酚三醇9'-葡萄糖苷	metab_2968	B(ii)	0	74.4	Flavonoids	类黄酮	Benzofuran flavonoids	苯骈呋喃酮类	C18	Secondary metabolite	-	-	HMDB0038711	M+NH4	C26H34O11	4.10823	-	-	pos	-	-	-	-	Phenylpropanoids and polyketides	2-arylbenzofuran flavonoids	540.244	0.000291282618066	54.3	0.20985397913684198	-	Not Available	4.45818	4.47209	4.48879	4.09628	4.09683	4.12786	3.39998	3.5133227436400003	3.48928
pos_3052	4-Hydroxyphenylglycine	对羟基苯甘氨酸	metab_2982	B(ii)	0	40.8	Amino acids and derivatives	氨基酸及其衍生物	Alpha amino acids and derivatives	Alpha氨基酸及其衍生物	C18	Primary metabolite	-	-	HMDB0244973	M+H	C8H9NO3	4.13123	-	-	pos	-	-	-	-	Organic acids and derivatives	Carboxylic acids and derivatives	168.065	0.004660776338989999	47.7	-0.136084	-	Amino acids, peptides, and analogues	3.0108	2.95617	3.0335	2.8692580274799995	2.80864	2.87849	4.19588	4.1656947667900015	4.22303
pos_3079	Kaempferol 3-(2''-feruloylglucosyl)-(1->2)-(6''-malonylglucoside)	-	metab_3008	B(i)	78.3	0	Flavonoids	类黄酮	Flavonoid glycosides	黄酮糖苷	C18	Secondary metabolite	-	-	LMPK12111955	M+H	C40H40O22	4.13123	-	-	pos	-	-	-	-	-	-	873.2081890810001	0.0018144582242400002	55.3	-0.241073	-	-	1.81105	1.57825	2.26121	3.95936	3.98427	3.99888	5.73003	5.69678	5.781801734069999
pos_3082	Toluene	甲苯	metab_3010	B(ii)	0	43.7	Others	其他类	Others	其他类	C18	Others	map01100	Metabolic pathways	HMDB0034168	M+H	C7H8	4.15393	代谢途径	C01455	pos	-	-	Metabolism	Global and overview maps	Benzenoids	Benzene and substituted derivatives	93.07032635430001	0.00353131397101	47.2	4.88434809370008	108-88-3	Toluenes	3.5046	3.48691	3.4787715271800006	3.6445	3.65792	3.66026	3.77427	3.78527	3.7617
pos_3083	M-Xylene	-	metab_3011	B(i)	88.1	0	Others	其他类	Others	其他类	C18	Others	map01100	Metabolic pathways	HMDB0059810	M+H	C8H10	4.15393	代谢途径	C07208	pos	-	-	Metabolism	Global and overview maps	Benzenoids	Benzene and substituted derivatives	107.086	0.0016307936578800002	56.7	2.74557505937191	108-38-3	Xylenes	4.120458738530002	4.12363	4.11871	4.4216	4.41724	4.4290565309500005	4.34896	4.34275	4.3336
pos_3084	(S)-(-)-Perillyl alcohol	（S） -（-）-紫苏醇	metab_3012	B(i)	89.7	0	Terpenoids	萜类	Monoterpenoids	单萜	C18	Secondary metabolite	map01110;map00902	Biosynthesis of secondary metabolites;Monoterpenoid biosynthesis	HMDB0003634	M+H-H2O	C10H16O	4.15393	次级代谢产物的生物合成;单萜生物合成	C02452	pos	-	-	Metabolism;Metabolism	Global and overview maps;Metabolism of terpenoids and polyketides	Lipids and lipid-like molecules	Prenol lipids	135.117	0.0016528423999200002	57.6	0.22163342305335898	536-59-4	Monoterpenoids	4.48275	4.49038	4.4597	4.83041	4.829419640899999	4.83209	4.76728	4.7709	4.7741805604800005
pos_3086	Nortricycloekasantalic acid	-	metab_3014	B(i)	93.1	0	Terpenoids	萜类	Monoterpenoids	单萜	C18	Secondary metabolite	-	-	HMDB0036817	M+H	C11H16O2	4.15393	-	-	pos	-	-	-	-	Lipids and lipid-like molecules	Prenol lipids	181.122	0.0036465898334000005	58.2	-0.0721498	59300-52-6	Monoterpenoids	3.51027	3.45257	3.4854398094800003	3.47511	3.34114	3.50892	3.45749	3.49026	3.45842
pos_3091	Casimiroin	-	metab_3019	B(ii)	0	45.5	Others	其他类	Quinolines and derivatives	喹啉及其衍生物	C18	Others	-	-	HMDB0033349	M+H	C12H11NO4	4.15393	-	C10654	pos	-	-	-	-	Organoheterocyclic compounds	Quinolines and derivatives	234.076	0.00450007419454	47.7	-0.534018	477-89-4	Quinolones and derivatives	3.5210172767300003	3.52488	3.5078827298900004	2.9904911990400005	3.05487	3.0014840580799995	3.24322	3.25298	3.23245
pos_3092	N-Feruloylglycine	-	metab_3020	B(i)	77.7	0	Amino acids and derivatives	氨基酸及其衍生物	Alpha amino acids and derivatives	Alpha氨基酸及其衍生物	C18	Primary metabolite	-	-	HMDB0059747	M+H	C12H13NO5	4.15393	-	C02564	pos	-	-	-	-	Organic acids and derivatives	Carboxylic acids and derivatives	252.087	0.0005543322277649999	54.9	-0.512383	-	Amino acids, peptides, and analogues	4.17329	4.18317	4.14401	3.71423	3.62982	3.70242	3.859	3.87492	3.88738
pos_3113	7-O-(6-feruoylglucosyl)isoorientin	-	metab_3039	B(i)	56.6	0	Flavonoids	类黄酮	Flavonoid glycosides	黄酮糖苷	C18	Secondary metabolite	-	-	-	M+H	C37H38O19	4.15393	-	-	pos	-	-	-	-	-	-	787.2073328639999	0.004872529419810001	48.7	-0.855454	-	-	2.9949035681900003	3.1917	3.04969	4.86191	4.83096	4.92408	4.01234	4.05778	3.98001
pos_3119	Gibberellin A51-catabolite	-	metab_3045	B(ii)	0	58.7	Terpenoids	萜类	Diterpenoids	二萜	C18	Secondary metabolite	map00904;map01110	Diterpenoid biosynthesis;Biosynthesis of secondary metabolites	HMDB0304363	M+NH4	C19H22O5	4.1763833333300004	二萜生物合成;次级代谢产物的生物合成	C11854	pos	-	-	Metabolism;Metabolism	Metabolism of terpenoids and polyketides;Global and overview maps	Lipids and lipid-like molecules	Prenol lipids	348.18	0.000628619920739	51	-0.59321	-	Diterpenoids	5.530267966819999	5.51755	5.50644	5.841930899319999	5.8612992979400005	5.86807	5.489886660190001	5.46531	5.47711
pos_3121	Ile-Glu-Leu	-	metab_3046	B(i)	92.1	0	Amino acids and derivatives	氨基酸及其衍生物	Other peptides	其他肽	C18	Primary metabolite	-	-	-	M+H	C17H31N3O6	4.1763833333300004	-	-	pos	-	-	-	-	-	-	374.228	0.000976077480023	55.5	-0.645368	-	-	4.61642	4.61683	4.59592	4.89652	4.91477	4.91951	4.947486597209999	4.9456505035600005	4.967
pos_3129	4-Vinylcyclohexene	4-乙烯基环己烯	metab_3051	B(i)	88.7	0	Others	其他类	Hydrocarbons and derivatives	烃类及其衍生物	C18	Others	-	-	HMDB0246592	M+H	C8H12	4.19838	-	C19310	pos	-	-	-	-	Hydrocarbons	Unsaturated hydrocarbons	109.10142947899999	0.00155974448336	56.9	2.33743529416007	100-40-3	Olefins	4.69715	4.695219685940001	4.7	4.6668	4.6641	4.69553	4.76889	4.7627786723900005	4.7513
pos_3135	Eriodictyol-7-O-Neohesperidoside	-	metab_3057	B(i)	48.1	0	Flavonoids	类黄酮	Flavonoid glycosides	黄酮糖苷	C18	Secondary metabolite	-	-	-	M+H-H2O	C27H32O15	4.19838	-	-	pos	-	-	-	-	-	-	579.171	0.000631754108386	48.8	0.66619881259276	-	-	5.780117752130001	5.77249	5.7599	5.27235	5.24673	5.278373461459999	4.9926	5.013026184469999	5.0100682906300005
pos_3137	Paeonoside	芍药糖苷	metab_3059	B(ii)	0	50.1	Flavonoids	类黄酮	Flavonoid glycosides	黄酮糖苷	C18	Secondary metabolite	-	-	HMDB0037433	M+Na	C27H30O16	4.19838	-	C10717	pos	-	-	-	-	Phenylpropanoids and polyketides	Flavonoids	633.145	0.005381898292010001	47.7	3.52492079819376	20309-70-0;25615-14-9	Flavonoid glycosides	3.96683	4.02668	3.9676	4.5293867935300005	4.51816	4.55078	4.2947	4.280275561619999	4.29827
pos_3138	Succinic acid	琥珀酸	metab_3060	B(i)	91	0	Organic acids and derivatives	有机酸及其衍生物	Organic acids and derivatives	有机酸及其衍生物	C18	Secondary metabolite	map01100;map00630;map00310;map01110;map00640;map00920;map00650;map01200;map00620;map00760;map00250;map00360;map00350;map00020;map00190	Metabolic pathways;Glyoxylate and dicarboxylate metabolism;Lysine degradation;Biosynthesis of secondary metabolites;Propanoate metabolism;Sulfur metabolism;Butanoate metabolism;Carbon metabolism;Pyruvate metabolism;Nicotinate and nicotinamide metabolism;Alanine, aspartate and glutamate metabolism;Phenylalanine metabolism;Tyrosine metabolism;Citrate cycle (TCA cycle);Oxidative phosphorylation	HMDB0000254;HMDB0303309;LMFA01170043;PW_C000174	M+H	C4H6O4	4.22012	代谢途径;乙醛酸和二羧酸代谢;赖氨酸降解;次级代谢产物的生物合成;丙酸代谢;硫代谢;丁酸代谢;碳代谢;丙酮酸代谢;烟酸和烟酰胺代谢;丙氨酸、天冬氨酸和谷氨酸代谢;苯丙氨酸代谢;酪氨酸代谢;柠檬酸盐循环（TCA循环）;氧化磷酸化	C00042	pos	Organic acids	Carboxylic acids	Metabolism;Metabolism;Metabolism;Metabolism;Metabolism;Metabolism;Metabolism;Metabolism;Metabolism;Metabolism;Metabolism;Metabolism;Metabolism;Metabolism;Metabolism	Global and overview maps;Carbohydrate metabolism;Amino acid metabolism;Global and overview maps;Carbohydrate metabolism;Energy metabolism;Carbohydrate metabolism;Global and overview maps;Carbohydrate metabolism;Metabolism of cofactors and vitamins;Amino acid metabolism;Amino acid metabolism;Amino acid metabolism;Carbohydrate metabolism;Energy metabolism	Organic acids and derivatives	Carboxylic acids and derivatives	119.034	0.00327525399798	57.3	1.29549991136218	110-15-6	Dicarboxylic acids and derivatives	2.89208	2.9045125854400005	2.8744876215900006	3.67108	3.62415	3.63773	2.88633	2.8761723881200005	2.81008
pos_3139	3,7-dihydropurin-6-one	-	metab_3061	B(i)	35.7	0	Others	其他类	Others	其他类	C18	Others	-	-	-	M+H	C5H4N4O	4.22012	-	-	pos	-	-	-	-	-	-	137.044	0.0017733864606300001	44.2	-9.78812	-	-	3.40423	3.41701	3.40959	4.20807	4.18988	4.21795	3.44856	3.45172	3.4560207040800006
pos_3141	Plumbagin	白花丹素	metab_3063	B(i)	38.9	0	Quinones	醌类	Naphthoquinones	萘醌	C18	Secondary metabolite	-	-	HMDB0256646	M+H-H2O	C11H8O3	4.22012	-	C10387	pos	-	-	-	-	Benzenoids	Naphthalenes	171.044	0.000979845868783	47.3	-0.391881	481-42-5	Naphthoquinones	3.7797704640300007	3.76714	3.72212	4.41078	4.41946	4.4066	3.78745	3.77498	3.76474
pos_3145	Tetradecanedioic acid	十四碳二元酸	metab_3067	B(ii)	0	49	Lipids	脂质	Fatty Acyls	脂肪酰类	C18	Primary metabolite	-	-	HMDB0000872	M+ACN+H	C14H26O4	4.22012	-	C11002	pos	-	-	-	-	Lipids and lipid-like molecules	Fatty Acyls	300.21682707900004	0.00400287757852	49.3	-0.417392	821-38-5	Fatty acids and conjugates	4.17228	4.1645	4.1890822108800005	3.645	3.63695	3.60746	2.7012	2.58802	2.83852
pos_3159	Cyclo(Ile-Ala)	-	metab_3078	B(i)	52.9	0	Others	其他类	Others	其他类	C18	Others	-	-	-	M+H	C9H16N2O2	4.24198	-	-	pos	-	-	-	-	-	-	185.12844168700002	0.00465649283208	49	-0.0679273	-	-	3.91052	3.945373574230001	3.93215	4.0419888122600005	4.05692	4.04133	4.0880270687300015	4.0298646921699985	4.04367
pos_3163	Ala-Leu-Ile	-	metab_3082	B(i)	88	0	Others	其他类	Others	其他类	C18	Others	-	-	-	M+H	C15H29N3O4	4.24198	-	-	pos	-	-	-	-	-	-	316.223	0.0024853004128600003	56.5	-0.695906	-	-	4.54931	4.55577	4.53004	4.70189	4.7362831646800005	4.69529	4.75329	4.67809	4.6767
pos_3166	Hedyotoside	-	metab_3085	B(i)	91.4	0	Terpenoids	萜类	Other terpenoids	其他萜类	C18	Secondary metabolite	-	-	-	M+H-H2O	C17H22O10	4.24198	-	-	pos	-	-	-	-	-	-	369.118	0.0019595980441800003	57.2	-0.890342	-	-	2.93319	2.63155	2.81693	4.47595	4.48083	4.47832	4.35026	4.30848	4.333586488530002
pos_3170	6''-Malonylapiin	-	metab_3087	B(ii)	0	71.4	Flavonoids	类黄酮	Flavonoid glycosides	黄酮糖苷	C18	Secondary metabolite	-	-	HMDB0037601	M+H	C29H30O17	4.24198	-	-	pos	-	-	-	-	Organic oxygen compounds	Organooxygen compounds	651.1554089790001	0.0007038327015289999	54	-0.256783	60478-75-3	Carbohydrates and carbohydrate conjugates	6.44949	6.454449984349999	6.44346	7.0120135148000005	6.98738	7.013361493360001	6.7918	6.7703232171200005	6.79766
pos_3171	Ala-His-His	-	metab_3088	B(i)	85.5	0	Others	其他类	Others	其他类	C18	Others	-	-	-	2M+H	C15H21N7O4	4.24198	-	-	pos	-	-	-	-	-	-	727.3434747560001	0.0009272300672560001	51.3	7.15094521563141	-	-	2.49909	1.86756	1.87688	1.97085	1.95904	1.96545	2.21948	1.96775	1.96125
pos_3174	Hydroquinone	氢醌	metab_3089	B(i)	77.1	0	Others	其他类	Others	其他类	C18	Others	map01100;map00350	Metabolic pathways;Tyrosine metabolism	HMDB0002434;PW_C001632	M+H	C6H6O2	4.26443	代谢途径;酪氨酸代谢	C00530;C15603	pos	-	-	Metabolism;Metabolism	Global and overview maps;Amino acid metabolism	Benzenoids	Phenols	111.04428390700001	0.00233166437431	54.5	2.0724300460927503	123-31-9	Benzenediols	3.2959396933300003	3.366	3.39666	3.36625	3.41206	3.40151	3.43749	3.44692	3.4382249977699995
pos_3175	1-(4-methylphenyl)ethanone	-	metab_3090	B(i)	93.3	0	Others	其他类	Ketones and derivatives	酮类及其衍生物	C18	Others	-	-	HMDB0032608	M+H-H2O	C9H10O	4.26443	-	-	pos	-	-	-	-	Organic oxygen compounds	Organooxygen compounds	117.07	0.005106133758300001	57.8	1.4267118282975	122-00-9	Carbonyl compounds	2.8986	2.9461983228099995	2.92168	3.5021126323100003	3.45856	3.48957	3.1431786984599994	3.22754	3.2037379084099995
pos_3177	2-Hydroxy-2,6-dimethylbenzofuran-3(2H)-one	-	metab_3092	B(i)	56.5	0	Others	其他类	Others	其他类	C18	Others	-	-	-	M+H	C10H10O3	4.26443	-	-	pos	-	-	-	-	-	-	179.07020849900002	0.00099399658073	50.9	-0.34882	-	-	4.59889	4.61842	4.60458	5.163763278319999	5.1626631962400005	5.161040900400001	4.67235	4.68472	4.69361
pos_3183	Dihydroartemisinin	二氢青蒿素	metab_3098	B(i)	90.9	0	Terpenoids	萜类	Sesquiterpenoids	倍半萜	C18	Secondary metabolite	-	-	HMDB0242686	M+H	C15H24O5	4.26443	-	-	pos	-	-	-	-	Lipids and lipid-like molecules	Prenol lipids	285.169	0.0016617162012800002	57.5	-0.690249	-	Sesquiterpenoids	4.43703	4.42489	4.42848	4.47122	4.4892879159199985	4.496883722840001	4.42256	4.42261	4.46322
pos_3184	(1R,2R,4S)-p-Menthane-1,2,8-triol 8-glucoside	（1R，2R，4S）-对薄荷烷-1,2,8-三醇8-葡萄糖苷	metab_3099	B(ii)	0	73.2	Carbohydrates and derivatives	碳水化合物及其衍生物	O-glycosyl compounds	O-糖基化合物	C18	Primary metabolite	-	-	HMDB0039894	M+H-2H2O	C16H30O8	4.26443	-	-	pos	-	-	-	-	Organic oxygen compounds	Organooxygen compounds	315.18	0.00235104019954	53.7	-0.377034	378254-09-2	Carbohydrates and carbohydrate conjugates	3.68086	3.66687	3.63705	4.04972	4.0837519259300015	4.05879	3.99801	4.03299	4.0224
pos_3187	Gln-Ser-Glu	-	metab_3102	B(i)	58.8	0	Others	其他类	Others	其他类	C18	Others	-	-	-	M+H	C13H22N4O8	4.26443	-	-	pos	-	-	-	-	-	-	363.15469439599997	0.0151241285074	49	10.090697278364	-	-	3.26978	3.2575694372900004	3.2956310503400004	4.18623	4.150557655919998	4.16154	3.66137	3.63445	3.71453
pos_3204	Benzyl alcohol	苯甲醇	metab_3118	B(i)	57.3	0	Others	其他类	Others	其他类	C18	Others	map01100	Metabolic pathways	HMDB0003119	M+H-H2O	C7H8O	4.28502	代谢途径	C00556;C03485	pos	-	-	Metabolism	Global and overview maps	Benzenoids	Benzene and substituted derivatives	91.0547	0.00213056798938	50.1	4.25807998328993	100-51-6	Benzyl alcohols	3.41115	3.43029	3.42892	3.88744	3.8914	3.89866	3.60992	3.59523	3.56288
pos_3210	6-methoxy-2-naphthylacetic acid	-	metab_3124	B(i)	54.7	0	Others	其他类	Others	其他类	C18	Others	-	-	HMDB0060787	M+H-H2O	C13H12O3	4.28502	-	-	pos	-	-	-	-	Benzenoids	Benzene and substituted derivatives	199.075	0.00195587300608	50.3	-0.225088	-	Benzoic acids and derivatives	0.626344	0.6297644007509999	0.637011	0.7119571885670001	1.78433	1.84109	0.706327	1.86765	1.63174
pos_3234	(5alpha,8beta,9beta)-5,9-Epoxy-3,6-megastigmadien-8-ol	（5alpha，8beta，9beta）-5,9-环氧-3,6-巨豆二烯-8-醇	metab_3148	B(ii)	0	73	Others	其他类	Benzopyrans	苯骈吡喃类	C18	Others	-	-	HMDB0034672	M+H-H2O	C13H20O2	4.30658	-	-	pos	-	-	-	-	Organoheterocyclic compounds	Benzopyrans	191.143	0.00207730742145	54	-0.179745	69927-26-0	Not Available	3.58879	3.55024	3.57327	3.99341	3.95031	3.95136	4.2139	4.22816	4.22629
pos_3240	Agnuside	穗花牡荆苷	metab_3154	B(ii)	0	67.6	Terpenoids	萜类	Other terpenoids	其他萜类	C18	Secondary metabolite	-	-	HMDB0036561	M+H	C22H26O11	4.30658	-	C09765	pos	-	-	-	-	Lipids and lipid-like molecules	Prenol lipids	467.154	0.00570627997476	52.9	-1.05501	11027-63-7	Terpene glycosides	3.72756	3.73203	3.74147	3.836564170940001	3.824619411530001	3.8311	3.82957	3.833430689180001	3.82685
pos_3255	P-tert-Amylphenol	-	metab_3169	B(i)	38.6	0	Others	其他类	Others	其他类	C18	Others	-	-	HMDB0246582	M+H	C11H16O	4.3294	-	C14226	pos	-	-	-	-	Benzenoids	Benzene and substituted derivatives	165.127	0.00365765250659	47.3	0.0375141350059424	80-46-6	Phenylpropanes	3.38696	3.43657	3.41981	3.841768176590001	3.84604	3.80837	3.78481	3.83322	3.82027
pos_3256	Ieodomycin D	-	metab_3170	B(i)	82.8	0	Lipids	脂质	Fatty Acyls	脂肪酰类	C18	Primary metabolite	-	-	LMFA01050563	M+H	C10H16O3	4.3294	-	-	pos	-	-	-	-	-	-	185.117	0.0019777467531900002	55.6	0.332280214948658	-	-	3.629112042840001	3.63096	3.61985	3.5945456859300005	3.62137	3.6283	3.63171	3.64758	3.65862
pos_3260	Isorupestonic acid	-	metab_3174	B(i)	79.6	0	Others	其他类	Ketones and derivatives	酮类及其衍生物	C18	Others	-	-	-	M+H	C14H18O3	4.3294	-	-	pos	-	-	-	-	-	-	235.133	0.00198769717652	55.1	-0.539766	-	-	3.11849	3.11033	3.07556	3.7319	3.72961	3.74102	4.1419566208999985	4.14816	4.19792
pos_3262	3alpha-Hydroxyoreadone	3 α -羟基罗汉果酮	metab_3176	B(i)	92.9	0	Others	其他类	Others	其他类	C18	Others	-	-	HMDB0036047	M+H	C14H20O4	4.3294	-	-	pos	-	-	-	-	Organoheterocyclic compounds	Naphthofurans	253.143	0.00202609084547	57.8	-0.628624	124869-06-3	Not Available	3.50643	3.53472	3.54665	4.19686	4.204683811580002	4.15209	4.56196	4.5793	4.59508
pos_3265	Bidenoside C	-	metab_3179	B(i)	48.8	0	Lipids	脂质	Fatty Acyls	脂肪酰类	C18	Primary metabolite	-	-	-	M+H	C16H22O6	4.3294	-	-	pos	-	-	-	-	-	-	311.149	0.00410387641742	48.9	-0.457823	-	-	1.90277	1.92806	2.09015	2.06697	2.34363	1.76176	2.25938	2.22103	2.39884
pos_3300	Diospyrin	柿醌	metab_3212	B(ii)	0	55.2	Flavonoids	类黄酮	Flavonoid glycosides	黄酮糖苷	C18	Secondary metabolite	-	-	HMDB0038867	M+H-H2O	C21H24O13	4.35202	-	C10332	pos	-	-	-	-	Phenylpropanoids and polyketides	Flavonoids	467.118	0.000842892120808	50.6	-0.0907568	28164-57-0;27838-81-9	Flavonoid glycosides	2.63276	2.10268	2.11205	2.63923	2.19463	2.2630337330200003	2.9797	2.87311	3.05868
pos_3312	2,4',5,7-Tetrahydroxyflavanone	2，4 '，5，7 -四羟基二氢黄酮	metab_3224	B(ii)	0	55.8	Flavonoids	类黄酮	Other flavonoids	其他类黄酮	C18	Secondary metabolite	-	-	HMDB0040314	M+H	C15H12O6	4.37485	-	-	pos	-	-	-	-	Phenylpropanoids and polyketides	Flavonoids	289.07	0.00047252352863499995	50.3	-0.835005	58124-18-8	Hydroxyflavonoids	3.89783	3.90091	3.87847	4.39334	4.3767	4.36185	3.84213	3.85739	3.85173
pos_3315	Supinine	仰卧天芥菜碱	metab_3227	B(ii)	0	73.7	Alkaloids and derivatives	生物碱及其衍生物	Other alkaloids and derivatives	其他类生物碱及其衍生物	C18	Secondary metabolite	-	-	HMDB0302362	M+CH3OH+H	C15H25NO4	4.37485	-	C10403	pos	-	-	-	-	Alkaloids and derivatives	Not Available	316.212	0.000295492059343	54.1	-0.37563	551-58-6	Not Available	4.24131	4.23149	4.23277	4.33769	4.3519316200199984	4.32522	3.3894021731200006	3.39253	3.48183
pos_3321	Armillyl orsellinate	亮菌素苔色酸酯	metab_3233	B(ii)	0	47.6	Terpenoids	萜类	Sesquiterpenoids	倍半萜	C18	Secondary metabolite	-	-	HMDB0035774	M+Na-H2O	C23H30O6	4.37485	-	-	pos	-	-	-	-	Lipids and lipid-like molecules	Prenol lipids	407.185	0.00627404923435	47.3	2.79528609644275	82105-51-9	Sesquiterpenoids	3.3884782185900004	3.32947	3.33943	3.61738	3.56174	3.5601813197900003	3.54845	3.5486120917800004	3.62995
pos_3339	Methyl 4-hydroxy-3,5-dimethoxybenzoate	-	metab_3251	B(i)	89.3	0	Phenolic acids and derivatives	酚酸类及其衍生物	Benzoic acids and derivatives	苯甲酸及其衍生物	C18	Secondary metabolite	-	-	HMDB0254615	M+H	C10H12O5	4.39795	-	-	pos	-	-	-	-	Benzenoids	Benzene and substituted derivatives	213.07558885400002	0.0064082745972599995	57.2	-0.759474	-	Benzoic acids and derivatives	2.63862	2.58222	2.60067	4.07251	4.07844	4.04509	3.07277	3.12242	3.08221
pos_3340	Isoplumbagin	异白花丹素	metab_3252	B(ii)	0	46.8	Quinones	醌类	Naphthoquinones	萘醌	C18	Secondary metabolite	-	-	HMDB0035291	M+CH3OH+H	C11H8O3	4.39795	-	-	pos	-	-	-	-	Benzenoids	Naphthalenes	221.081	0.0032836687778	48.6	-1.51636	14777-17-4	Naphthoquinones	4.23202	4.2463	4.22858	4.03261	4.07428	4.0318	4.59938	4.621075039669999	4.633357876540001
pos_3343	Arg-Ala-Lys	-	metab_3255	B(i)	81.3	0	Others	其他类	Others	其他类	C18	Others	-	-	-	M+H	C15H31N7O4	4.39795	-	-	pos	-	-	-	-	-	-	374.254	0.00115934075416	54.1	7.08166278034102	-	-	4.61234	4.63588	4.61673	4.15667	4.23612	4.15597	3.41663	3.3646905249000003	3.3545
pos_3359	3-Indoleacrylate	-	metab_3271	B(i)	97	0	Indoles and derivatives	吲哚及其衍生物	Indoles and derivatives	吲哚及其衍生物	C18	Secondary metabolite	-	-	-	M+H	C11H9NO2	4.42038	-	C21283	pos	-	-	-	-	-	-	188.07052408400003	0.00389454994703	57.8	-0.43237	-	-	2.96354	2.8681838978099994	2.9380695896599995	2.65163	2.67607	2.5066089229700004	2.92192	2.88145	2.84868
pos_3361	6,10-Dimethyl-5(E),9-undecadien-2-one	6,10-二甲基-5（E），9-十一二烯-2-酮	metab_3273	B(i)	89.9	0	Terpenoids	萜类	Monoterpenoids	单萜	C18	Secondary metabolite	-	-	LMFA11000696	M+H	C13H22O	4.42038	-	-	pos	-	-	-	-	-	-	195.17432933900002	0.0029159708837900003	57.4	-0.0639543	-	-	2.62735	2.6808	2.75852	2.8206208051700004	2.87802	2.83836	3.11274	3.24512	3.22941
pos_3363	Buthionine sulfoximine	丁硫氨酸亚砜胺	metab_3275	B(ii)	0	44.7	Amino acids and derivatives	氨基酸及其衍生物	Alpha amino acids and derivatives	Alpha氨基酸及其衍生物	C18	Primary metabolite	-	-	HMDB0249462	M+Na	C8H18N2O3S	4.42038	-	C04543	pos	-	-	-	-	Organic acids and derivatives	Carboxylic acids and derivatives	245.092	0.0028978948629099998	46.3	-5.17034	5072-26-4	Amino acids, peptides, and analogues	2.27895	2.16659	2.31935	1.72378	1.7120664907700005	1.71842	2.33243	2.49666	2.2341
pos_3364	Indole-3-acetyl-L-aspartic acid	-	metab_3276	B(i)	96.6	0	Amino acids and derivatives	氨基酸及其衍生物	Aspartic acid and derivatives	天冬氨酸及其衍生物	C18	Primary metabolite	-	-	HMDB0038666	M+H	C14H14N2O5	4.42038	-	-	pos	-	-	-	-	Organic acids and derivatives	Carboxylic acids and derivatives	291.097	0.00170761823037	58.6	-0.760118	2456-73-7	Amino acids, peptides, and analogues	2.90406	2.69252	2.85926	1.79569	2.01337	1.91005	2.97425	2.80934	2.89499
pos_3381	(E)-Methyl-4-hydroxycinnamate	-	metab_3292	B(i)	80.6	0	Phenolic acids and derivatives	酚酸类及其衍生物	Cinnamic acids and derivatives	肉桂酸及其衍生物	C18	Secondary metabolite	-	-	-	M+H	C10H10O3	4.4429	-	-	pos	-	-	-	-	-	-	179.07	0.00407777461698	55.8	-0.3081	-	-	4.17597	4.12606	4.09671	4.6169833461300005	4.66755	4.60579	4.33544	4.28587	4.26502
pos_3391	Phenylethyl primeveroside	苯乙基委陵菜苷	metab_3302	B(ii)	0	57.4	Carbohydrates and derivatives	碳水化合物及其衍生物	O-glycosyl compounds	O-糖基化合物	C18	Primary metabolite	-	-	HMDB0041274	M+H	C19H28O10	4.4429	-	-	pos	-	-	-	-	Organic oxygen compounds	Organooxygen compounds	417.175	0.00336845641206	40.1	-1.24125	129932-48-5	Carbohydrates and carbohydrate conjugates	4.18623	4.19099	4.16666	4.74897	4.88098	4.76106	4.999758018540001	5.00063	5.02209
pos_3394	Neoisoastilbin	新异落新妇苷	metab_3305	B(ii)	0	47.6	Flavonoids	类黄酮	Flavonoid glycosides	黄酮糖苷	C18	Secondary metabolite	-	-	HMDB0242667	M+Na	C21H22O11	4.4429	-	-	pos	-	-	-	-	Phenylpropanoids and polyketides	Flavonoids	473.107	0.00234873963895	48.3	3.90840434353666	-	Flavonoid glycosides	2.56429	2.73127	2.60918	2.06183	2.04999	2.05641	2.18206	2.05872	2.25683
pos_3403	Cinnamyl alcohol	肉桂醇	metab_3312	B(i)	88.7	0	Others	其他类	Others	其他类	C18	Others	map01110	Biosynthesis of secondary metabolites	HMDB0029697;HMDB0029698;HMDB0029697;HMDB0029698	M+H-H2O	C9H10O	4.4647	次级代谢产物的生物合成	C02394	pos	-	-	Metabolism	Global and overview maps	Phenylpropanoids and polyketides	Cinnamyl alcohols	117.07	0.00331621630518	56.9	1.4309968485794398	104-54-1;4407-36-7	Not Available	2.92098	2.83483	2.89149	3.36925	3.43388	3.35531	3.01709	2.99991	3.01967
pos_3404	2,5-Furandicarboxaldehyde	2，5 -呋喃二甲醛	metab_3313	B(i)	43.8	0	Others	其他类	Aldehydes and derivatives	醛类及其衍生物	C18	Others	-	-	-	M+H	C6H4O3	4.4647	-	C20899	pos	-	-	-	-	-	-	125.023	0.0019033476838599998	48.3	1.1776592963364099	823-82-5	-	4.53543	4.52972	4.5258092022600005	4.554089402330001	4.5160671504900005	4.52721	4.541364182900001	4.54187	4.50826
pos_3416	Glu-Ile-Phe	-	metab_3325	B(i)	73.6	0	Amino acids and derivatives	氨基酸及其衍生物	Oligopeptides	寡肽	C18	Primary metabolite	-	-	-	M+H	C20H29N3O6	4.4647	-	-	pos	-	-	-	-	-	-	408.213	0.00163620409204	53.7	-0.191371	-	-	4.36201	4.3472142599199985	4.29768	4.33977	4.33836	4.339151747819998	4.33354	4.36263	4.34488
pos_3425	Phenol A	苯酚A	metab_3333	B(i)	91	0	Others	其他类	Others	其他类	C18	Others	-	-	HMDB0256407	M+H	C11H16O3	4.4872	-	-	pos	-	-	-	-	Benzenoids	Benzene and substituted derivatives	197.117	0.00383442828506	57.6	-0.0529143	-	Phenylpropanes	3.76658	3.73979	3.74321	3.71404	3.6867	3.71025	4.09338	4.13853	4.1077680479100005
pos_3430	Loxoprofen	洛索洛芬钠	metab_3338	B(i)	78.2	0	Phenolic acids and derivatives	酚酸类及其衍生物	Phenylpropanoic acids and derivatives	苯丙酸及其衍生物	C18	Secondary metabolite	-	-	HMDB0041920	M+H	C15H18O3	4.4872	-	-	pos	-	-	-	-	Phenylpropanoids and polyketides	Phenylpropanoic acids	247.133	0.00609503699657	54.9	-0.505343	80382-23-6	Not Available	3.78105	3.78893	3.75637	3.97516	3.97373	3.9526	4.1986992563099985	4.23482	4.20802
pos_3433	Trp-Leu	-	metab_3341	B(i)	96.6	0	Amino acids and derivatives	氨基酸及其衍生物	Dipeptides	二肽	C18	Primary metabolite	-	-	HMDB0029087	M+H	C17H23N3O3	4.4872	-	-	pos	-	-	-	-	Organic acids and derivatives	Carboxylic acids and derivatives	318.181	0.0008738760198280001	58.3	-0.312922	-	Amino acids, peptides, and analogues	4.50007	4.499551058530001	4.4721	4.36244	4.386859029069998	4.34962	4.517852410490001	4.50139	4.49016
pos_3456	Lotusine	莲心季铵碱	metab_3363	B(ii)	0	42	Others	其他类	Isoquinolines and derivatives	异喹啉及其衍生物	C18	Others	-	-	HMDB0033347	M+H	C19H24NO3+	4.50937	-	C17567	pos	-	-	-	-	Organoheterocyclic compounds	Isoquinolines and derivatives	315.18	0.00976486323843	44.7	-8.73251	6871-67-6	Benzylisoquinolines	3.0937771798400004	3.06382	3.0486798418400003	2.93515	3.06643	3.0282365763700003	3.71258	3.66534	3.67856
pos_3462	Leucanthoside	-	metab_3369	B(i)	40	0	Flavonoids	类黄酮	Flavonoid glycosides	黄酮糖苷	C18	Secondary metabolite	-	-	HMDB0030569	M+H	C22H22O11	4.50937	-	C10187	pos	-	-	-	-	Phenylpropanoids and polyketides	Flavonoids	463.123	0.00531952191504	47.4	-0.596543	6980-25-2	Flavonoid glycosides	0.269662	1.2904547355299998	0.276155	1.69694	0.317274	0.320645	0.319846	1.37652	1.3438416588799995
pos_3467	Mollupentin 2''-O-rhamnoside	-	metab_3374	B(i)	88.3	0	Flavonoids	类黄酮	Flavonoid glycosides	黄酮糖苷	C18	Secondary metabolite	-	-	LMPK12110235	M+H	C26H28O13	4.50937	-	-	pos	-	-	-	-	-	-	549.16	0.000225272744145	56.7	0.37992249954652796	-	-	4.93158	4.90634	4.940750478469999	4.8353	4.8258520892400005	4.79679	4.43302	4.44406	4.457459254630002
pos_3475	(3Z,6Z)-3,6-Nonadien-1-ol	（3Z，6Z）-3,6-壬二烯-1-醇	metab_3382	B(ii)	0	44.7	Lipids	脂质	Fatty Acyls	脂肪酰类	C18	Primary metabolite	-	-	HMDB0030957	M+H-H2O	C9H16O	4.53208	-	-	pos	-	-	-	-	Lipids and lipid-like molecules	Fatty Acyls	123.11693268799999	0.008105522020290001	48.1	0.7551069072211851	53046-97-2	Fatty alcohols	3.19161	3.11337	3.0998929040200003	2.98244	3.24338	3.0718108241400004	3.47472	3.42698	3.3704892222900003
pos_3476	Sulcatone	苏卡酮（6-甲基-5-庚烯-2-酮）	metab_3383	B(i)	68.7	0	Others	其他类	Ketones and derivatives	酮类及其衍生物	C18	Others	-	-	HMDB0035915	M+H	C8H14O	4.53208	-	C07287	pos	-	-	-	-	Organic oxygen compounds	Organooxygen compounds	127.11181492200001	0.00281233192229	52.9	0.582224116955258	110-93-0	Carbonyl compounds	3.09966	3.0618350860100003	3.07687	2.79365	2.89076	2.96045	3.3624298355400004	3.31823	3.2652691220300003
pos_3478	Limonene oxide	-	metab_3385	B(i)	93.5	0	Others	其他类	Others	其他类	C18	Others	-	-	HMDB0035158	M+H	C10H16O	4.53208	-	C07271	pos	-	-	-	-	Organoheterocyclic compounds	Oxepanes	153.127	0.0014274917248800001	58.2	-0.379551	1195-92-2	Not Available	4.38376	4.38645	4.36852	4.63486	4.63075	4.6334599593300005	4.48272	4.49365	4.49777
pos_3480	Trans-2-Methyl-5-isopropylhexa-2,5-dienoic acid	-	metab_3387	B(i)	86.9	0	Terpenoids	萜类	Monoterpenoids	单萜	C18	Secondary metabolite	-	-	-	M+H	C10H16O2	4.53208	-	C11943	pos	-	-	-	-	-	-	169.122	0.00147340752417	56.7	-0.395663	65860-54-0	-	3.6542	3.64717	3.64153	3.94016	3.94164	3.94392	4.35252	4.34695	4.33258
pos_3483	(1S,2S,4R,8R)-p-Menthane-1,2,9-triol	（1S，2S，4R，8R）-对薄荷烷-1,2,9-三醇	metab_3390	B(ii)	0	55.7	Terpenoids	萜类	Monoterpenoids	单萜	C18	Secondary metabolite	-	-	HMDB0039470	M+H	C10H20O3	4.53208	-	-	pos	-	-	-	-	Lipids and lipid-like molecules	Prenol lipids	189.14834187900001	0.00797206638833	50.4	-0.951697	378254-06-9	Monoterpenoids	1.51797	1.52231	1.53147	1.62406	1.6124	1.61873	3.15255	3.05178	2.8547
pos_3493	Chlovalicin	-	metab_3400	B(i)	94.8	0	Others	其他类	Alcohols and derivatives	醇类及其衍生物	C18	Others	-	-	-	M+H	C16H25ClO5	4.53208	-	-	pos	-	-	-	-	-	-	333.147	0.00251564005684	52.8	2.3994794701367597	-	-	3.66446	3.40033	3.4868837966500004	3.1171803226300003	2.3163181133200004	3.31371	4.4619	4.45593	4.41006
pos_3499	Trimethobenzamide	三甲氧苯酰胺	metab_3406	B(ii)	0	51	Phenolic acids and derivatives	酚酸类及其衍生物	Benzoic acids and derivatives	苯甲酸及其衍生物	C18	Secondary metabolite	-	-	HMDB0014800	M+H	C21H28N2O5	4.53208	-	C07178	pos	-	-	-	-	Benzenoids	Benzene and substituted derivatives	389.207	0.0142824	48.6	-1.31769	138-56-7	Benzoic acids and derivatives	2.43438	2.20955	2.01218	1.95797	2.1471	2.15064	2.60572	2.48515	2.5331273265000003
pos_3504	Carthamone	醌式红花苷	metab_3411	B(ii)	0	50.2	Phenolic acids and derivatives	酚酸类及其衍生物	Cinnamic acids and derivatives	肉桂酸及其衍生物	C18	Secondary metabolite	-	-	HMDB0037377	M+CH3OH+H	C21H20O11	4.53208	-	C08598	pos	-	-	-	-	Phenylpropanoids and polyketides	Cinnamic acids and derivatives	481.134	0.0009654240382889999	49.6	-0.508689	86579-00-2	Hydroxycinnamic acids and derivatives	2.12411	2.12855	2.13792	2.2324069035900003	2.2205313023599995	2.22697	2.22545	2.22929	2.22275
pos_3505	Chamaemeloside	-	metab_3412	B(ii)	0	65	Flavonoids	类黄酮	Flavonoid glycosides	黄酮糖苷	C18	Secondary metabolite	-	-	HMDB0041459	M+H	C27H28O14	4.53208	-	-	pos	-	-	-	-	Benzenoids	Benzene and substituted derivatives	577.155	0.000637186675936	52.1	-0.0524767	173356-77-9	Benzoic acids and derivatives	6.6455446812900005	6.64079	6.62833	6.44323	6.45289	6.43507	6.14786	6.14379	6.15986
pos_3512	3-(3,4-Methylenedioxyphenyl)propenal	3-（3,4-亚甲二氧基苯基）丙烯	metab_3418	B(ii)	0	49.1	Others	其他类	Others	其他类	C18	Others	-	-	HMDB0033813	M+H	C10H8O3	4.55385	-	-	pos	-	-	-	-	Organoheterocyclic compounds	Benzodioxoles	177.055	0.007940704446010001	49.1	-0.623681	14756-00-4	Not Available	3.00578	2.93837	2.93902	3.4930375640699998	3.71828	3.4939492960500003	3.49379	3.43727	3.37446
pos_3515	Aromadendrin	香橙素	metab_3421	B(ii)	0	62.6	Flavonoids	类黄酮	Flavanol	黄烷醇	C18	Secondary metabolite	map01100;map00941;map01110	Metabolic pathways;Flavonoid biosynthesis;Biosynthesis of secondary metabolites	HMDB0030847	M+H	C15H12O6	4.55385	代谢途径;类黄酮生物合成;次级代谢产物的生物合成	C00974	pos	-	-	Metabolism;Metabolism;Metabolism	Global and overview maps;Biosynthesis of other secondary metabolites;Global and overview maps	Phenylpropanoids and polyketides	Flavonoids	289.07027463400004	0.024602838456099996	51.4	-1.35352	480-20-6	Flavans	2.30971	2.25636	2.06038	2.0506	2.32947	2.04519	2.04367	2.22813	2.04098
pos_3516	Methyl dihydrophaseate	二氢相酸甲酯	metab_3422	B(ii)	0	62.7	Terpenoids	萜类	Sesquiterpenoids	倍半萜	C18	Secondary metabolite	-	-	HMDB0039376	M+NH4	C16H24O5	4.55385	-	-	pos	-	-	-	-	Lipids and lipid-like molecules	Prenol lipids	314.196	0.006534280004259999	51.6	-0.245779	-	Sesquiterpenoids	3.73385	3.5916162058199994	3.62182	3.36279	3.14967	3.2854580772400004	3.03409	2.9199	2.8638
pos_3524	4,7-Megastigmadien-9-ol	4,7-巨豆二烯-9-醇	metab_3428	B(ii)	0	52.6	Terpenoids	萜类	Sesquiterpenoids	倍半萜	C18	Secondary metabolite	-	-	HMDB0038731	M+H	C13H22O	4.57553	-	-	pos	-	-	-	-	Lipids and lipid-like molecules	Prenol lipids	195.17417047400002	0.0181313982263	49.2	-0.882143	25312-34-9	Sesquiterpenoids	2.12825	1.89923	1.79577	1.86028	1.8485	1.85489	2.8637	2.64519	2.53671
pos_3526	(1(10)E,4a,5E)-1(10),5-Germacradiene-12-acetoxy-4,11-diol	（1（10）E，4a，5E）-1（10），5-Germacradiene-12-乙酰氧基-4,11-二醇	metab_3430	B(ii)	0	64.9	Terpenoids	萜类	Sesquiterpenoids	倍半萜	C18	Secondary metabolite	-	-	HMDB0038798	M+NH4	C17H28O4	4.57553	-	-	pos	-	-	-	-	Lipids and lipid-like molecules	Prenol lipids	314.233	0.00608198794158	52.1	0.147475443625019	143305-08-2	Sesquiterpenoids	2.56133	1.93126	1.94059	2.03472	2.02289	2.02931	2.02779	2.0316181666900004	2.0251
pos_3533	Cerarvensin	-	metab_3437	B(i)	96.5	0	Flavonoids	类黄酮	Flavonoid glycosides	黄酮糖苷	C18	Secondary metabolite	-	-	LMPK12110195	M+H	C20H18O9	4.6369	-	-	pos	-	-	-	-	-	-	403.10137409199996	0.00160241151926	58.2	-2.44841	-	-	4.34322	4.27845	4.31522	4.03408	4.05716	3.97859	4.11056	3.85835	4.020820787240002
pos_3535	Fabianine	-	metab_3439	B(i)	86.8	0	Others	其他类	Quinolines and derivatives	喹啉及其衍生物	C18	Others	-	-	-	M+H	C14H21NO	4.65743	-	C09949	pos	-	-	-	-	-	-	220.17	0.006697965537899999	54.3	-0.38892	6871-51-8	-	2.70285	2.70732	2.71674	2.8116876521900003	2.79976	2.80623	2.8047	2.80856	2.80199
pos_3539	2'-Hydroxygenistein 7-O-(6''-malonylglucoside)	-	metab_3442	B(i)	87.5	0	Flavonoids	类黄酮	Isoflavones	异黄酮	C18	Secondary metabolite	-	-	HMDB0039247	M+H	C24H22O14	4.72077	-	-	pos	-	-	-	-	Phenylpropanoids and polyketides	Isoflavonoids	535.107	0.013812129055600001	54.9	-1.70911	137351-13-4	Isoflavonoid O-glycosides	3.00965	3.0141158315599994	3.02355	3.95297	4.04202	3.66238	5.12647	5.096021610719999	5.10501
pos_3542	Eucatropine	-	metab_3444	B(i)	94.6	0	Others	其他类	Piperidines	哌啶类	C18	Others	-	-	-	M+H	C17H25NO3	4.74247	-	-	pos	-	-	-	-	-	-	292.19014499400004	0.012006372731399999	57	-1.97506	-	-	2.7367	2.42049	2.95694	3.69114	3.53435	3.65103	3.4841520168800004	3.71881	3.81573
pos_3544	Ergonovine	麦角新碱	metab_3446	B(ii)	0	46.2	Alkaloids and derivatives	生物碱及其衍生物	Other alkaloids and derivatives	其他类生物碱及其衍生物	C18	Secondary metabolite	-	-	HMDB0015383	M+CH3OH+Na	C19H23N3O2	4.74247	-	C07543	pos	-	-	-	-	Alkaloids and derivatives	Ergoline and derivatives	380.196	0.0010356224788	46	4.73803323973854	60-79-7	Lysergic acids and derivatives	6.3888116565600015	6.3908526071099985	6.38073	5.91143	5.91785	5.90089	5.618884079990001	5.60045	5.63275
pos_3547	6-pentylpyran-2-one	-	metab_3449	B(i)	65.2	0	Others	其他类	Others	其他类	C18	Others	-	-	HMDB0031085	M+H	C10H14O2	4.76382	-	-	pos	-	-	-	-	Organoheterocyclic compounds	Pyrans	167.106	0.0286357218738	50.7	-0.982749	27593-23-3	Pyranones and derivatives	2.3982	2.41185	2.58177	2.85304	2.84741	2.32447	2.84317	3.11189	3.1051462352900003
pos_3549	Caudoxirene	-	metab_3451	B(i)	81.1	0	Others	其他类	Others	其他类	C18	Others	-	-	-	M+H	C11H14O	4.7859	-	-	pos	-	-	-	-	-	-	163.112	0.015388295267799999	55.3	-1.02798	-	-	2.10427	2.10106	2.3028342361700003	3.3746	3.11753	3.2382992726700004	3.90879	3.9197	3.89313
pos_3550	Pterosin E	蕨素E	metab_3452	B(ii)	0	50.9	Others	其他类	Others	其他类	C18	Others	-	-	HMDB0036605	M+H-H2O	C14H16O3	4.7859	-	-	pos	-	-	-	-	Benzenoids	Indanes	215.106	0.014249653030799999	48.3	-1.54232	52528-78-6	Indanones	2.23505	2.2395	2.24889	2.95188	2.5242028424200003	2.9127	3.76368	3.58576	3.60822
pos_3551	Lacinilene D	-	metab_3453	B(i)	76.3	0	Others	其他类	Naphthalenes	萘类	C18	Others	-	-	-	M+H	C14H16O3	4.7859	-	-	pos	-	-	-	-	-	-	233.11698081900002	0.00498448441409	54.1	-1.03393	-	-	2.55828	2.56274	2.57216	3.9123	3.75815	3.76948	4.5698687852800015	4.5575	4.5593402565400005
pos_3574	2-Isopropylphenol	2—异丙基苯酚	metab_3472	B(i)	76	0	Others	其他类	Others	其他类	C18	Others	-	-	HMDB0032029	M+H	C9H12O	4.85255	-	-	pos	-	-	-	-	Benzenoids	Benzene and substituted derivatives	137.096	0.0006101084103150001	54	-0.426811	88-69-7	Cumenes	3.18105	3.3076612213200005	3.21575	3.5853316311000003	3.55897	3.57137	3.92238	3.88027	3.90129
pos_3575	3-hydroxydecanoic acid	-	metab_3473	B(i)	91.3	0	Organic acids and derivatives	有机酸及其衍生物	Organic acids and derivatives	有机酸及其衍生物	C18	Secondary metabolite	-	-	HMDB0002203	M+H	C10H20O3	4.85255	-	-	pos	-	-	-	-	Organic acids and derivatives	Hydroxy acids and derivatives	189.148	0.0006704559510289999	57.9	-0.614893	19526-23-9	Medium-chain hydroxy acids and derivatives	1.6908	1.80726	1.70444	1.7978580598500002	1.7861	1.79248	1.79097	1.79477	1.7883
pos_3576	(+)-cis-5,6-Dihydro-5-hydroxy-4-methoxy-6-(2-phenylethyl)-2H-pyran-2-one	（+）-顺式-5,6-二氢-5-羟基-4-甲氧基-6-（2-苯乙基）-2H-吡喃-2-酮	metab_3474	B(ii)	0	48.8	Others	其他类	Others	其他类	C18	Others	-	-	HMDB0029575	M+NH4	C14H16O4	4.85255	-	-	pos	-	-	-	-	Phenylpropanoids and polyketides	Kavalactones	266.138	0.022364425213599996	46.4	-1.39849	52247-81-1	Not Available	3.5719853337900003	3.46927	3.45741	3.40051	3.4429	3.33455	3.2666791668400004	3.2705406692400003	3.26397
pos_3578	5-p-Coumaroylquinic acid	5 -对-香豆酰奎宁酸	metab_3476	B(ii)	0	70.2	Phenolic acids and derivatives	酚酸类及其衍生物	Quinic acids and derivatives	奎宁酸及其衍生物	C18	Secondary metabolite	map00940;map00941;map01110;map00945	Phenylpropanoid biosynthesis;Flavonoid biosynthesis;Biosynthesis of secondary metabolites;Stilbenoid, diarylheptanoid and gingerol biosynthesis	HMDB0301709	M+H	C16H18O8	4.85255	苯丙烷生物合成;类黄酮生物合成;次级代谢产物的生物合成;二苯乙烯、二芳基庚烷类和姜酚生物合成	C12208	pos	-	-	Metabolism;Metabolism;Metabolism;Metabolism	Biosynthesis of other secondary metabolites;Biosynthesis of other secondary metabolites;Global and overview maps;Biosynthesis of other secondary metabolites	Organic oxygen compounds	Organooxygen compounds	339.108	0.00113203896868	53	0.578887836218968	-	Alcohols and polyols	3.3805650978500004	3.38413	3.36945	4.9401	4.9655275023500005	4.93831	3.91266	3.994238266690001	3.8776704933800006
pos_3585	Capecitabine	卡培他滨	metab_3483	B(ii)	0	40.8	Nucleotides and derivatives	核苷酸及其衍生物	Nucleotides and derivatives	核苷酸及其衍生物	C18	Primary metabolite	-	-	HMDB0015233	M+ACN+H	C15H22FN3O6	4.85255	-	C12650	pos	-	-	-	-	Nucleosides, nucleotides, and analogues	5''-deoxyribonucleosides	401.18	0.00340974157594	44.9	-8.07705	154361-50-9	Not Available	2.5342	2.53866	2.97891	3.5654060872500004	3.52079	3.34198	3.4994281973500003	3.69645	3.64719
pos_3588	G(8-O-4)S Glycerol	-	metab_3486	B(i)	86.1	0	Lignans and derivatives	木脂素类及其衍生物	Lignans and derivatives	木脂素类及其衍生物	C18	Secondary metabolite	-	-	-	M+H	C21H28O10	4.85255	-	-	pos	-	-	-	-	-	-	441.172	0.0030693403440500006	54.2	-7.40099	-	-	2.97696	3.25455	2.65548	4.39164	4.36075	4.3202	4.63186	4.63104	4.61055
pos_3599	N-octanoyl-l-homoserine lactone	-	metab_3497	B(ii)	0	69.8	Amino acids and derivatives	氨基酸及其衍生物	Alpha amino acids and derivatives	Alpha氨基酸及其衍生物	C18	Primary metabolite	-	-	HMDB0255213	M+H-2H2O	C12H21NO3	4.89728	-	C21199	pos	-	-	-	-	Organic acids and derivatives	Carboxylic acids and derivatives	192.138	0.00287412074983	52.8	-0.292647	147852-84-4	Amino acids, peptides, and analogues	1.94458	1.949	1.95834	2.05251	2.04067	2.04709	2.04557	2.0494	2.0428835370700003
pos_3601	Diethyltoluamide	避蚊胺	metab_3499	B(i)	86.4	0	Others	其他类	Others	其他类	C18	Others	-	-	HMDB0250930	M+NH4	C12H17NO	4.89728	-	C10935	pos	-	-	-	-	Benzenoids	Benzene and substituted derivatives	209.165	0.005328785749100001	56.7	-0.491493	134-62-3	Toluenes	2.0135775064400003	2.01801	2.0273618414700003	2.12167	2.10981	2.11624	2.11472	2.11856	2.11203
pos_3604	2-(6-methyl-7-oxooctyl)-2H-uran-5-one	-	metab_3502	B(i)	73.1	0	Others	其他类	Others	其他类	C18	Others	-	-	-	M+H	C13H20O3	4.89728	-	-	pos	-	-	-	-	-	-	225.148	0.00188616781721	53.7	-0.797529	-	-	3.39643	3.45188	3.42448	3.81388	3.85118	3.80587	4.05759	3.95232	3.99814
pos_3616	Cadabicine	卡达比辛	metab_3513	B(ii)	0	65.6	Others	其他类	Ethers	醚类	C18	Others	-	-	HMDB0033451	M+CH3OH+Na	C25H29N3O4	4.89728	-	-	pos	-	-	-	-	Organic oxygen compounds	Organooxygen compounds	490.228	0.0016743781344	49.8	-7.07063	99964-83-7	Ethers	2.79261	2.79708	2.8065	4.48781	4.51326	4.48233	3.71501	3.64802	3.61807
pos_3617	Trp-His-Arg	-	metab_3514	B(i)	37.7	0	Others	其他类	Others	其他类	C18	Others	-	-	-	M+H	C23H31N9O4	4.89728	-	-	pos	-	-	-	-	-	-	498.25436101400004	0.0064713783129700005	45.3	-5.66301	-	-	2.49613	2.50059	2.51	2.60485	2.59293	2.5994	2.59787	2.60172	2.59516
pos_3625	Isoeugenitol	异丁香醇	metab_3522	B(ii)	0	49.3	Others	其他类	Benzopyrans	苯骈吡喃类	C18	Others	-	-	HMDB0029472	M+CH3OH+H	C11H10O4	4.91972	-	-	pos	-	-	-	-	Organoheterocyclic compounds	Benzopyrans	239.09115299299998	0.00227051346925	49.3	-1.19863	479-06-1	1-benzopyrans	2.8610111760400003	3.15468	3.1458	3.61971	3.5553248011500003	3.69255	3.62688	3.5324995030300004	3.45707
pos_3627	Tanacetol B	菊蒿醇B	metab_3524	B(ii)	0	41.7	Terpenoids	萜类	Sesquiterpenoids	倍半萜	C18	Secondary metabolite	-	-	HMDB0035075	M+NH4	C17H28O4	4.91972	-	-	pos	-	-	-	-	Lipids and lipid-like molecules	Prenol lipids	314.232	0.00141005460108	47.6	-0.447658	86787-28-2	Sesquiterpenoids	5.03956	5.05058	5.03431	4.503555624430001	4.52593	4.50101	3.68633	3.576	3.64066
pos_3637	(Z)-Isogeranic acid	-	metab_3534	B(i)	70.7	0	Terpenoids	萜类	Monoterpenoids	单萜	C18	Secondary metabolite	-	-	-	M+H	C10H16O2	4.94227	-	-	pos	-	-	-	-	-	-	169.122	0.0009452189184410002	52.9	-0.595162	-	-	3.59892	3.65313	3.64479	3.68896	3.65994	3.71776	3.77735	3.7972177446300006	3.78214
pos_3638	Godotol A	-	metab_3535	B(i)	63	0	Others	其他类	Alcohols and derivatives	醇类及其衍生物	C18	Others	-	-	-	M+H	C15H24O2	4.94227	-	-	pos	-	-	-	-	-	-	237.185	0.00306310036724	51.7	-1.04172	-	-	4.04507	4.04028	4.01165	4.18574	4.19107	4.20954	4.31877	4.31528	4.28463
pos_3660	(2R)-Pterosin B	-	metab_3557	B(i)	70.2	0	Others	其他类	Others	其他类	C18	Others	-	-	HMDB0030759	M+H	C14H18O2	4.98728	-	-	pos	-	-	-	-	Benzenoids	Indanes	219.138	0.0012333219166199999	53.2	-0.71708	34175-96-7	Indanones	3.60277	3.58826	3.61067	3.5403002210900003	3.5536	3.53617	3.90416	3.86043	3.88403
pos_3661	Ipomeatetrahydrofuran	-	metab_3558	B(ii)	0	60	Terpenoids	萜类	Sesquiterpenoids	倍半萜	C18	Secondary metabolite	-	-	HMDB0040904	M+H	C15H28O3	4.98728	-	-	pos	-	-	-	-	Lipids and lipid-like molecules	Prenol lipids	257.211	0.00560939298876	51.4	-0.783323	92448-62-9	Sesquiterpenoids	1.9836	1.98802	1.99737	2.0916194368900003	2.07977	2.0862	2.08468	2.08851	2.08199
pos_3663	Isobiflorin	异双花母草素	metab_3560	B(i)	54.7	0	Carbohydrates and derivatives	碳水化合物及其衍生物	Glycosides	糖苷类	C18	Primary metabolite	-	-	HMDB0040632	M+H-2H2O	C16H18O9	4.98728	-	-	pos	-	-	-	-	Organic oxygen compounds	Organooxygen compounds	319.081	0.0578140690698	50	-0.115569	152041-16-2	Carbohydrates and carbohydrate conjugates	2.28163	2.28608	2.29548	2.39015	2.37826	2.3847088639400003	2.38318	2.38703	2.3804818626400004
pos_3666	Val-Phe-Phe	-	metab_3563	B(i)	69.5	0	Amino acids and derivatives	氨基酸及其衍生物	Other peptides	其他肽	C18	Primary metabolite	-	-	-	M+H	C23H29N3O4	4.98728	-	-	pos	-	-	-	-	-	-	412.22211506400004	0.00104343958164	51.9	-2.35349	-	-	3.65037	3.5132	3.62627	3.9984	3.98837	3.91335	4.2069832483999985	4.19361	4.208
pos_3669	Calamin	炉甘石	metab_3566	B(ii)	0	70.1	Steroids and steroid derivatives	甾体及其衍生物	Steroid lactones	甾体内酯	C18	Secondary metabolite	-	-	HMDB0038143	M+	C27H36O10	4.98728	-	-	pos	-	-	-	-	Organoheterocyclic compounds	Diazines	520.232	0.00104195779317	52.1	2.22537685453596	74751-40-9	Pyrazines	5.510331353840001	5.50988	5.514878681900001	5.08334	5.109444728630001	5.0544622424800005	4.79709	4.82187	4.83357
pos_3673	Cyclohexanecarboxylic acid	环己基甲酸	metab_3570	B(i)	54.7	0	Organic acids and derivatives	有机酸及其衍生物	Organic acids and derivatives	有机酸及其衍生物	C18	Secondary metabolite	map01100	Metabolic pathways	HMDB0031342	M+H-2H2O	C7H12O2	5.0099	代谢途径	C09822	pos	-	-	Metabolism	Global and overview maps	Organic acids and derivatives	Carboxylic acids and derivatives	93.0703	0.0018053816667599999	49.6	3.3487253868223603	98-89-5	Carboxylic acids	3.40504	3.4000342259400003	3.40048	3.49815	3.50543	3.50397	3.73156	3.71059	3.69528
pos_3677	P-Mentha-1,3,8-triene	-	metab_3574	B(i)	79.5	0	Terpenoids	萜类	Monoterpenoids	单萜	C18	Secondary metabolite	-	-	HMDB0037013	M+H	C10H14	5.0099	-	-	pos	-	-	-	-	Lipids and lipid-like molecules	Prenol lipids	135.117	0.000532209564111	55.7	-0.108337	18368-95-1	Monoterpenoids	4.49599	4.51277	4.49594	4.62281	4.634645356619999	4.62195	4.94188	4.93759	4.94852
pos_3679	Citronellal	香茅醛	metab_3576	B(i)	71.2	0	Terpenoids	萜类	Monoterpenoids	单萜	C18	Secondary metabolite	-	-	HMDB0035841	M+H	C10H18O	5.0099	-	C17384	pos	-	-	-	-	Lipids and lipid-like molecules	Prenol lipids	155.143	0.0014713839413	53.6	-0.760495	106-23-0	Monoterpenoids	3.59376	3.60896	3.60997	3.4267618531700004	3.4485116009199994	3.46519	3.902466210940001	3.91399	3.93068
pos_3681	Exo-Norbicycloekasantalal	-	metab_3578	B(i)	81.2	0	Terpenoids	萜类	Monoterpenoids	单萜	C18	Secondary metabolite	-	-	HMDB0036719	M+H	C11H16O	5.0099	-	-	pos	-	-	-	-	Lipids and lipid-like molecules	Prenol lipids	165.127	0.0013305645970099998	55.8	-0.234935	37720-84-6	Monoterpenoids	3.99326	3.99873	3.95836	3.95011	3.97771	3.96016	4.34662	4.31774	4.32839
pos_3685	Alpha-Corocalene	-	metab_3582	B(i)	79.1	0	Terpenoids	萜类	Sesquiterpenoids	倍半萜	C18	Secondary metabolite	-	-	HMDB0038204	M+H	C15H20	5.0099	-	-	pos	-	-	-	-	Lipids and lipid-like molecules	Prenol lipids	201.164	0.00229455599407	55.3	-0.314697	20129-39-9	Sesquiterpenoids	4.432200728440001	4.43482	4.41721	4.71071	4.71644	4.68597	4.89606	4.90374	4.90249
pos_3686	Eremopetasinorone A	-	metab_3583	B(ii)	0	51.1	Others	其他类	Ketones and derivatives	酮类及其衍生物	C18	Others	-	-	HMDB0029669	M+H	C13H18O2	5.0099	-	-	pos	-	-	-	-	Organic oxygen compounds	Organooxygen compounds	207.138	0.000680105626951	49.7	-0.559213	182127-76-0	Carbonyl compounds	3.82547	3.82754	3.78983	3.91695	3.93802	3.93907	4.311	4.27905	4.28711
pos_3687	Bisacumol	双硫醇	metab_3584	B(i)	86.9	0	Terpenoids	萜类	Sesquiterpenoids	倍半萜	C18	Secondary metabolite	-	-	HMDB0038511	M+H	C15H22O	5.0099	-	-	pos	-	-	-	-	Lipids and lipid-like molecules	Prenol lipids	219.17420432400002	0.0010001561935800002	56.7	-0.629944	120710-98-7	Sesquiterpenoids	4.61213	4.628317115530001	4.63089	4.89215	4.90202	4.90198	5.1554438754400005	5.17027	5.1777
pos_3693	(-)-trans-Carveol glucoside	（-）-反式卡维醇葡萄糖苷	metab_3590	B(ii)	0	54.8	Terpenoids	萜类	Other terpenoids	其他萜类	C18	Secondary metabolite	-	-	HMDB0029848	M+H	C16H26O6	5.0099	-	-	pos	-	-	-	-	Lipids and lipid-like molecules	Prenol lipids	315.18	0.0008479888482230001	50.2	-0.749662	113349-30-7	Terpene glycosides	5.08862	5.10105	5.10051	4.91924	4.94229	4.91721	5.41925	5.44524	5.46423
pos_3694	Gly-Arg-Thr	-	metab_3591	B(i)	60.2	0	Others	其他类	Others	其他类	C18	Others	-	-	-	M+H	C12H24N6O5	5.0099	-	-	pos	-	-	-	-	-	-	333.191	0.0006730207129419999	49.7	8.17581415914379	-	-	4.49174	4.50085	4.4983	4.34947	4.31298	4.31185	4.84033	4.851295872930001	4.89148
pos_3704	(+/-)-1-(4-Methylphenyl)ethanol	-	metab_3601	B(ii)	0	55.9	Others	其他类	Others	其他类	C18	Others	-	-	HMDB0034378	M+H-H2O	C9H12O	5.03197	-	-	pos	-	-	-	-	Benzenoids	Benzene and substituted derivatives	119.086	0.0024633282545500003	50.5	0.9446997210520591	5788-09-0	Toluenes	3.84443	3.88301	3.8332	4.026379509090002	4.02996	4.03917	4.43169	4.409012151030001	4.40752
pos_3706	Lumisantonin	-	metab_3603	B(i)	68.1	0	Others	其他类	Others	其他类	C18	Others	-	-	-	M+H	C15H18O3	5.03197	-	-	pos	-	-	-	-	-	-	247.133	0.0147198	52.9	-0.771339	-	-	1.74301	1.74741	1.75668	2.20292	2.3664146127200003	2.1316	1.8434	1.8472	2.34619
pos_3710	Trp-Phe-Glu	-	metab_3607	B(i)	57.3	0	Amino acids and derivatives	氨基酸及其衍生物	Other peptides	其他肽	C18	Primary metabolite	-	-	-	M+H	C25H28N4O6	5.03197	-	-	pos	-	-	-	-	-	-	481.20421066800003	0.00116958	47.9	-8.22655	-	-	3.74431	3.70325	3.70533	4.70961	4.76614	4.71539	5.00692	5.00793	5.00013
pos_3718	Chenopodienolone	-	metab_3615	B(i)	78.4	0	Terpenoids	萜类	Sesquiterpenoids	倍半萜	C18	Secondary metabolite	-	-	-	M+H	C15H22O2	5.05418	-	-	pos	-	-	-	-	-	-	235.16911460900002	0.00239844781796	55.1	-0.605428	-	-	3.62246	3.61355	3.5682324984800005	3.66783	3.7170079946800008	3.66454	3.79853	3.746567255950001	3.75259
pos_3719	13-Hydroxycapsidiol	-	metab_3616	B(i)	43.1	0	Terpenoids	萜类	Sesquiterpenoids	倍半萜	C18	Secondary metabolite	-	-	-	M+H	C15H24O3	5.05418	-	-	pos	-	-	-	-	-	-	253.17959404200002	0.0013286131463699996	47.8	-0.900251	-	-	2.98222	3.06959	3.0641	3.07682	3.27129	3.1800535137700003	3.2621	3.158009234140001	3.1613566003099995
pos_3726	Zeanoside C	玉米甙C	metab_3623	B(ii)	0	71.6	Carbohydrates and derivatives	碳水化合物及其衍生物	Glycosides	糖苷类	C18	Primary metabolite	-	-	HMDB0038960	2M+H	C16H19NO10	5.05418	-	-	pos	-	-	-	-	Organic oxygen compounds	Organooxygen compounds	771.2124250589999	0.00136490684966	49.6	4.35860745791576	120293-55-2	Carbohydrates and carbohydrate conjugates	5.26058	5.2639	5.27767	5.80657	5.8373149490600005	5.79457	4.87498	4.808102573719999	4.82245
pos_3732	4-(2,6,6-Trimethyl-1-cyclohexen-1-yl)-2-butanone	4-（2,6,6-三甲基-1-环己烯-1-基）-2-丁酮	metab_3628	B(ii)	0	45.4	Terpenoids	萜类	Sesquiterpenoids	倍半萜	C18	Secondary metabolite	-	-	HMDB0032913	M+H	C13H22O	5.07712	-	C03527	pos	-	-	-	-	Lipids and lipid-like molecules	Prenol lipids	195.17429927599997	0.00141603132995	48.7	-0.218785	17283-81-7	Sesquiterpenoids	3.27249	3.23598	3.19834	3.85776	3.87769	3.8812377098300006	4.00832	4.02492	3.99523
pos_3739	Gln-Thr-His	-	metab_3635	B(i)	61.8	0	Others	其他类	Others	其他类	C18	Others	-	-	-	M+H	C15H24N6O6	5.07712	-	-	pos	-	-	-	-	-	-	385.185	0.00202545668011	50.8	6.1527327385762405	-	-	2.18876	2.25018	2.20259	3.32972	3.26149	3.31603	3.1971610553900005	3.24653	3.25812
pos_3741	Phe-Asn-Tyr	-	metab_3637	B(i)	79.3	0	Others	其他类	Others	其他类	C18	Others	-	-	-	M+H	C22H26N4O6	5.07712	-	-	pos	-	-	-	-	-	-	443.19	0.00123637488384	53.1	-6.58539	-	-	2.2279	0.956442	2.51006	2.88294	3.04697	3.0543291204000003	2.81247	2.54909	2.82974
pos_3743	Sarcaglaboside D	-	metab_3639	B(i)	60.6	0	Terpenoids	萜类	Other terpenoids	其他萜类	C18	Secondary metabolite	-	-	-	M+H	C26H38O12	5.07712	-	-	pos	-	-	-	-	-	-	543.241	0.0011012472102699998	49.8	-4.90202	-	-	3.62406	3.61084	3.38183	4.25485	4.2903	4.24468	4.33824	4.32574	4.38395
pos_3746	Violet-leaf aldehyde	紫罗兰-叶醛	metab_3642	B(ii)	0	45	Others	其他类	Aldehydes and derivatives	醛类及其衍生物	C18	Others	-	-	HMDB0033857	M+H-H2O	C9H14O	5.09977	-	C08499	pos	-	-	-	-	Organic oxygen compounds	Organooxygen compounds	121.101	0.00144869760033	48.1	0.8821714171805191	557-48-2	Carbonyl compounds	3.51741	3.50878	3.51663	3.77303	3.79118	3.7658	3.95242	3.88146	3.89526
pos_3760	Erinapyrone B	猴头菌吡喃酮B	metab_3656	B(ii)	0	45.2	Others	其他类	Others	其他类	C18	Others	-	-	HMDB0041427	M+H-2H2O	C7H10O3	5.12252	-	-	pos	-	-	-	-	Organoheterocyclic compounds	Pyrans	107.049	0.00125504791773	48.4	2.02533595194892	146064-67-7	Pyranones and derivatives	3.2247222628099994	3.17288	3.1548416130400003	3.24684	3.23432	3.22603	3.25373	3.18041	3.1766786703500003
pos_3774	2'',6''-Di-O-acetylononin	2″，6″-二-O-乙酰壬酸	metab_3670	B(ii)	0	61.9	Flavonoids	类黄酮	Isoflavones	异黄酮	C18	Secondary metabolite	-	-	HMDB0039925	M+H	C26H26O11	5.12252	-	-	pos	-	-	-	-	Phenylpropanoids and polyketides	Flavonoids	515.153	0.00109031650296	50.3	-3.88404	-	Flavonoid glycosides	2.37272	2.37718	2.38658	2.48134	2.46944	2.47589	2.47437	2.4782190127900003	2.47166
pos_3782	Vernopolyanthofuran	-	metab_3678	B(i)	70.9	0	Others	其他类	Ketones and derivatives	酮类及其衍生物	C18	Others	-	-	-	M+H	C15H22O3	5.14528	-	-	pos	-	-	-	-	-	-	251.164	0.00207931308198	53.5	-0.626487	-	-	3.2864	3.26211	3.26004	3.21465	3.19588	3.25197	3.26419	3.24236	3.2224728979000004
pos_3786	(R)-1-O-[b-D-Glucopyranosyl-(1->6)-b-D-glucopyranoside]-1,3-octanediol	（R） -1-O-[b-D-吡喃葡萄糖苷-（1->6）-b-D-吡喃葡萄糖苷]-1,3-辛二醇	metab_3682	B(ii)	0	77.5	Lipids	脂质	Fatty Acyls	脂肪酰类	C18	Primary metabolite	-	-	HMDB0032799	M+Na-H2O	C20H38O12	5.14528	-	-	pos	-	-	-	-	Lipids and lipid-like molecules	Fatty Acyls	475.217	0.000549154836467	54.2	3.71622836833216	-	Fatty acyl glycosides	3.69664	3.698	3.60788	3.39393	3.48761	3.46078	3.5728586531300004	3.6154	3.5689
pos_3794	4-Propylphenol	4-丙基苯酚	metab_3689	B(i)	77.8	0	Others	其他类	Others	其他类	C18	Others	-	-	HMDB0032625	M+H	C9H12O	5.16818	-	C14311	pos	-	-	-	-	Benzenoids	Benzene and substituted derivatives	137.096	0.0008599644475119999	54.9	0.11567699685637099	645-56-7	Phenylpropanes	3.93493	3.9207774615800006	3.91898	4.29119	4.29332	4.28413	4.42051	4.41284	4.41551
pos_3795	Isocyperol	异香附醇	metab_3690	B(ii)	0	69.3	Terpenoids	萜类	Sesquiterpenoids	倍半萜	C18	Secondary metabolite	-	-	HMDB0035718	M+H-H2O	C15H24O	5.16818	-	C16974	pos	-	-	-	-	Lipids and lipid-like molecules	Prenol lipids	203.179	0.00102178325131	52.1	-0.144051	20085-00-1	Sesquiterpenoids	3.86782	3.84758	3.79	4.00353	3.98541	3.99868	4.48096	4.47324	4.45433
pos_3796	Helianthol A	-	metab_3691	B(i)	95.6	0	Terpenoids	萜类	Sesquiterpenoids	倍半萜	C18	Secondary metabolite	-	-	HMDB0035739	M+H	C15H24O	5.16818	-	-	pos	-	-	-	-	Lipids and lipid-like molecules	Prenol lipids	221.19	0.00157630495021	58.5	-0.505867	72916-06-4	Sesquiterpenoids	4.093539312869999	4.1023597492000015	4.0870449327800005	4.25346	4.22703	4.245485575330002	4.85683	4.85163	4.84776
pos_3797	Cys-gamma-Glu	-	metab_3692	B(ii)	0	56	Others	其他类	Others	其他类	C18	Others	-	-	HMDB0028789	M+Na-H2O	C8H15N3O4S	5.16818	-	-	pos	-	-	-	-	Organic acids and derivatives	Carboxylic acids and derivatives	254.05762723400002	0.000579747550939	49.9	0.40252383642801004	-	Amino acids, peptides, and analogues	3.47192	3.52733	3.4378378684599995	3.78176	3.80964	3.77063	3.4588042172300004	3.5011575037300005	3.50747
pos_3798	Abietinal	枞醛	metab_3693	B(ii)	0	44.5	Terpenoids	萜类	Diterpenoids	二萜	C18	Secondary metabolite	map01100;map00904;map01110	Metabolic pathways;Diterpenoid biosynthesis;Biosynthesis of secondary metabolites	HMDB0034735	M+CH3OH+Na	C20H30O	5.16818	代谢途径;二萜生物合成;次级代谢产物的生物合成	C11887	pos	-	-	Metabolism;Metabolism;Metabolism	Global and overview maps;Metabolism of terpenoids and polyketides;Global and overview maps	Lipids and lipid-like molecules	Prenol lipids	341.244	0.00214273531298	46.6	-5.13106	6704-50-3	Diterpenoids	4.0881740556800015	4.07724	4.09597	4.22489	4.23332	4.206020167659998	4.02752	4.0511502099699985	3.97782
pos_3805	2-Methylbenzoic acid	2 -甲基苯甲酸	metab_3700	B(i)	68.3	0	Phenolic acids and derivatives	酚酸类及其衍生物	Benzoic acids and derivatives	苯甲酸及其衍生物	C18	Secondary metabolite	map01100	Metabolic pathways	HMDB0002340	M+H	C8H8O2	5.1911	代谢途径	C07215	pos	-	-	Metabolism	Global and overview maps	Benzenoids	Benzene and substituted derivatives	137.06	0.0053500261743999996	52.2	-0.0524064	118-90-1	Benzoic acids and derivatives	3.48228	3.47305	3.47571	3.45044	3.46764	3.45535	3.48271	3.45397	3.42852
pos_3806	Phlegmariurine A	-	metab_3701	B(i)	51.7	0	Organic acids and derivatives	有机酸及其衍生物	Organic acids and derivatives	有机酸及其衍生物	C18	Secondary metabolite	-	-	-	M+NH4	C16H23NO2	5.1911	-	-	pos	-	-	-	-	-	-	279.20661750799997	0.00610050362673	49.4	-0.333126	-	-	3.4504735398800004	3.4928404092800003	3.4798632527099995	3.54865	3.57978	3.64927	3.29886	3.2494717952900003	3.28687
pos_3816	(3Z,6Z,9Z)-3,6,9-Dodecatrien-1-ol	-	metab_3711	B(i)	51.9	0	Lipids	脂质	Fatty Acyls	脂肪酰类	C18	Primary metabolite	-	-	-	M+H	C12H20O	5.21415	-	C08375	pos	-	-	-	-	-	-	181.159	0.00158983240937	50	-0.361882	81345-02-0	-	3.18946	3.17998	3.1506377966900003	3.0591917894700003	3.11782	3.1444587531700003	3.16777	3.16773	3.24605
pos_3818	Aloe-emodin	芦荟大黄素	metab_3713	B(i)	52.8	0	Quinones	醌类	Anthraquinones	蒽醌	C18	Secondary metabolite	-	-	HMDB0030829;LMPK13040002	M+H	C15H10O5	5.21415	-	C10294	pos	-	-	-	-	Benzenoids	Anthracenes	271.059	0.0019866887811400002	48.8	-5.69535	481-72-1	Anthraquinones	3.61162	3.60567	3.60553	4.01615	4.04011	3.99786	3.55413	3.57979	3.5345
pos_3821	Pimentol	-	metab_3716	B(ii)	0	45.3	Carbohydrates and derivatives	碳水化合物及其衍生物	Glycosides	糖苷类	C18	Primary metabolite	-	-	HMDB0035442	M+H	C23H26O12	5.21415	-	-	pos	-	-	-	-	Organic oxygen compounds	Organooxygen compounds	495.149	0.000881817974718	48.5	-0.493742	141913-95-3	Carbohydrates and carbohydrate conjugates	1.67104	1.67542	1.6846662581999998	3.09401	3.06048	3.15166	3.33092	3.41445	3.33859
pos_3822	1,5-Dicaffeoylquinic acid	1,5-二咖啡酰喹宁酸	metab_3717	B(ii)	0	61.7	Phenolic acids and derivatives	酚酸类及其衍生物	Quinic acids and derivatives	奎宁酸及其衍生物	C18	Secondary metabolite	-	-	HMDB0030093	M+H	C25H24O12	5.21415	-	C10445	pos	-	-	-	-	Organic oxygen compounds	Organooxygen compounds	517.1316782609999	0.0029092451506199995	50.2	-4.60037	30964-13-7	Alcohols and polyols	3.704985480940001	3.70946	3.7189	3.81399	3.80205	3.80853	3.807	3.8108596971699993	3.80428
pos_3833	1,2-Naphthoquinone	1,2-萘醌	metab_3728	B(i)	84.6	0	Quinones	醌类	Naphthoquinones	萘醌	C18	Secondary metabolite	-	-	HMDB0244101	M+H	C10H6O2	5.2598333333300005	-	C14783	pos	-	-	-	-	Benzenoids	Naphthalenes	159.044	0.00119354257865	56	-0.346482	524-42-5	Naphthoquinones	3.0915715390200003	2.9568709868400003	2.9858512543799995	3.55459	3.60133	3.59371	3.00436	3.00068	3.06646
pos_3837	Chalconaringenin	柑橘查耳酮	metab_3732	B(i)	72.7	0	Flavonoids	类黄酮	Chalcones	查尔酮	C18	Secondary metabolite	map01100;map00941;map01110	Metabolic pathways;Flavonoid biosynthesis;Biosynthesis of secondary metabolites	HMDB0029631	M+H	C15H12O5	5.2598333333300005	代谢途径;类黄酮生物合成;次级代谢产物的生物合成	C06561	pos	-	-	Metabolism;Metabolism;Metabolism	Global and overview maps;Biosynthesis of other secondary metabolites;Global and overview maps	Phenylpropanoids and polyketides	Linear 1,3-diarylpropanoids	273.075	0.00139217258878	53.8	-1.21875	25515-46-2;5071-40-9	Chalcones and dihydrochalcones	3.59273	3.58534	3.53342	4.15694	4.18225	4.16525	3.76328	3.78486	3.781477884280001
pos_3856	Vicenin iii	-	metab_3750	B(i)	70.9	0	Flavonoids	类黄酮	Flavonoid glycosides	黄酮糖苷	C18	Secondary metabolite	-	-	-	M+H-H2O	C26H28O14	5.28278	-	-	pos	-	-	-	-	-	-	547.144	0.0031330727895200004	52.8	-1.32396	-	-	3.7898366004300006	3.82181	3.8099719416199993	4.591338084519999	4.64036	4.61451	3.96728	3.99377	4.0081197834300015
pos_3864	Sepedonin	-	metab_3758	B(i)	79.2	0	Others	其他类	Others	其他类	C18	Others	-	-	-	M+H-H2O	C11H12O5	5.30587	-	-	pos	-	-	-	-	-	-	207.065	0.0016049905739	55.4	-0.0627779	-	-	3.4202	3.38687	3.44325	4.07706	4.09566	4.058916374140002	4.0658354581000005	4.09806	4.06072
pos_3865	(S)-9-Hydroxy-10-undecenoic acid	（S） -9-羟基-10-十一烯酸	metab_3759	B(ii)	0	62.8	Organic acids and derivatives	有机酸及其衍生物	Organic acids and derivatives	有机酸及其衍生物	C18	Secondary metabolite	-	-	HMDB0032662	M+ACN+H	C11H20O3	5.30587	-	-	pos	-	-	-	-	Organic acids and derivatives	Hydroxy acids and derivatives	242.175	0.0053027381374100005	52.1	-0.648185	-	Medium-chain hydroxy acids and derivatives	2.8155778084400005	2.76002	2.76009	2.51975	2.5080199534900003	2.54238	2.18562	2.43283	2.36347
pos_3866	Neolinustatin	新亚麻双糖苦苷	metab_3760	B(ii)	0	48.9	Carbohydrates and derivatives	碳水化合物及其衍生物	Glycosides	糖苷类	C18	Primary metabolite	-	-	HMDB0038482	M+H-2H2O	C17H29NO11	5.30587	-	C08336	pos	-	-	-	-	Organic oxygen compounds	Organooxygen compounds	388.15979227699995	0.00300996803491	48.8	-0.981943	72229-42-6	Carbohydrates and carbohydrate conjugates	1.96412	1.96855	1.97789	2.0721013049400003	2.51224	2.06668	2.0651635280900003	2.06899	2.06247
pos_3869	4-Cresol	-	metab_3762	B(i)	78.8	0	Others	其他类	Others	其他类	C18	Others	map01100	Metabolic pathways	HMDB0001858	M+H	C7H8O	5.32695	代谢途径	C01468	pos	-	-	Metabolism	Global and overview maps	Benzenoids	Phenols	109.065	0.00105865342467	54.7	2.5258118204526	106-44-5	Cresols	3.45298	3.4432395465300005	3.4398175891000005	3.71612	3.71701	3.693	4.0172914023400015	4.04303	4.04208
pos_3870	Ibufenac	异丁苯乙酸	metab_3763	B(i)	81.6	0	Others	其他类	Others	其他类	C18	Others	-	-	HMDB0253333	M+H	C12H16O2	5.32695	-	-	pos	-	-	-	-	Benzenoids	Benzene and substituted derivatives	193.122	0.000839773641479	55.6	0.10766896778779901	-	Phenylpropanes	4.455054456469999	4.43106	4.42475	4.65906	4.68955	4.6639220773000005	4.59514	4.62253	4.600936592669999
pos_3871	3-[(3aS,4S,7aS)-1,5-dioxo-octahydroinden-4-yl]propanoic acid	-	metab_3764	B(i)	39.9	0	Lipids	脂质	Fatty Acyls	脂肪酰类	C18	Primary metabolite	-	-	-	M+H	C12H16O4	5.32695	-	-	pos	-	-	-	-	-	-	225.11195167099999	0.0025498975118	47.4	-0.819939	-	-	2.79418	2.79314	2.78149	2.8781	2.9445876347500004	2.78626	2.9891568582300003	3.00003	2.99223
pos_3872	Xanthoxic acid	-	metab_3765	B(i)	69.6	0	Terpenoids	萜类	Sesquiterpenoids	倍半萜	C18	Secondary metabolite	map00906	Carotenoid biosynthesis	-	M+H	C15H22O4	5.32695	类胡萝卜素生物合成	C13454	pos	-	-	Metabolism	Metabolism of terpenoids and polyketides	-	-	267.159	0.00144665463968	53.1	-0.904848	-	-	4.21204	4.20039	4.20645	4.45597	4.48463	4.462169654069998	4.3785113649300005	4.40683	4.39182
pos_3882	Neoacrimarine H	新吖啶胺H	metab_3775	B(ii)	0	55.5	Others	其他类	Quinolines and derivatives	喹啉及其衍生物	C18	Others	-	-	HMDB0033031	M+CH3OH+Na	C33H29NO8	5.32695	-	-	pos	-	-	-	-	Organoheterocyclic compounds	Quinolines and derivatives	622.206	0.012287084639700002	49.5	3.00308702524272	217199-06-9	Benzoquinolines	1.63683	1.6412	1.65043	1.74362	1.73189	1.73826	1.73675	2.06864	1.7340887716599998
pos_3887	Luteolin 3'-methyl ether 7-malonylglucoside	-	metab_3780	B(i)	91.1	0	Flavonoids	类黄酮	Flavonoid glycosides	黄酮糖苷	C18	Secondary metabolite	-	-	LMPK12110785	M+H	C25H24O14	5.34982	-	-	pos	-	-	-	-	-	-	549.124	0.00615262931009	57.4	-0.00938025	-	-	0.5205747063639999	0.523704	0.530341	3.29582	3.42098	3.47575	4.02441	4.04286	4.0200289518900005
pos_3895	Lubiminol	-	metab_3788	B(ii)	0	47.5	Terpenoids	萜类	Sesquiterpenoids	倍半萜	C18	Secondary metabolite	-	-	HMDB0029604	M+CH3OH+Na	C15H26O3	5.371016666669999	-	-	pos	-	-	-	-	Lipids and lipid-like molecules	Prenol lipids	309.206	0.00436891949681	46.8	8.713056474351799	55784-92-4	Sesquiterpenoids	3.722326764700001	3.75676	3.73982	3.68832	3.76112	3.71202	3.7627668933800007	3.67459	3.6734144514699993
pos_3904	Multifidene	-	metab_3796	B(i)	81.4	0	Others	其他类	Hydrocarbons and derivatives	烃类及其衍生物	C18	Others	-	-	-	M+H	C11H16	5.39395	-	-	pos	-	-	-	-	-	-	149.132	0.00182020670385	55.9	0.009956337654179	-	-	3.55006	3.54381	3.56968	3.97341	3.9361	3.938	3.94862	3.96485	3.96987
pos_3905	Beta-fenchocamphorone	-	metab_3797	B(i)	79.7	0	Terpenoids	萜类	Monoterpenoids	单萜	C18	Secondary metabolite	-	-	-	M+H	C11H18O	5.39395	-	-	pos	-	-	-	-	-	-	167.143	0.00265426415324	55.3	-0.128625	-	-	3.3258	3.31156	3.31418	3.77705	3.71435	3.74951	3.62367	3.67294	3.68393
pos_3906	5,7alpha-Dihydro-1,4,4,7a-tetramethyl-4H-indene	5，7 -二氢- 1，4，4，7A -四甲基- 4H -茚	metab_3798	B(ii)	0	69.5	Others	其他类	Hydrocarbons and derivatives	烃类及其衍生物	C18	Others	-	-	HMDB0036683	M+H	C13H18	5.39395	-	-	pos	-	-	-	-	Hydrocarbons	Unsaturated hydrocarbons	175.148	0.00145209149999	53.6	-0.0682823	99901-21-0	Branched unsaturated hydrocarbons	3.80209	3.82665	3.79757	4.23759	4.21588	4.21407	4.809656186030001	4.79063	4.80865
pos_3908	Alpha-Ionone	-	metab_3800	B(i)	71.2	0	Terpenoids	萜类	Sesquiterpenoids	倍半萜	C18	Secondary metabolite	-	-	HMDB0059883	M+H	C13H20O	5.39395	-	C12286	pos	-	-	-	-	Lipids and lipid-like molecules	Prenol lipids	193.15871742099998	0.0010266903866200001	53.9	0.13389396753765498	127-41-3	Sesquiterpenoids	3.77829	3.76893	3.78929	4.14703	4.14623	4.15309	4.897587441590001	4.9087	4.90283
pos_3909	Trans-2, 3, 4-Trimethoxycinnamate	反式- 2，3，4 -三甲氧基肉桂酸酯	metab_3801	B(ii)	0	41.3	Phenolic acids and derivatives	酚酸类及其衍生物	Cinnamic acids and derivatives	肉桂酸及其衍生物	C18	Secondary metabolite	-	-	HMDB0011721	M+H	C12H14O5	5.39395	-	-	pos	-	-	-	-	Phenylpropanoids and polyketides	Cinnamic acids and derivatives	239.091	0.0014841926877900001	47.6	-1.05087	33130-03-9	Hydroxycinnamic acids and derivatives	3.53677	3.53776	3.50123	4.081733420930002	4.06179	4.072157205330002	3.72961	3.71219	3.75473
pos_3913	Briarlide H	-	metab_3805	B(i)	85.7	0	Others	其他类	Others	其他类	C18	Others	-	-	-	M+H	C24H32O10	5.39395	-	-	pos	-	-	-	-	-	-	481.204	0.0021782289095800002	54.9	-5.15812	-	-	3.71738	3.70548	3.7545	4.6079157875300005	4.62216	4.61488	5.24257	5.24178	5.257199866040001
pos_3943	Cladospolide D	-	metab_3834	B(i)	57.2	0	Others	其他类	Macrolides and derivatives	大环内酯类及其衍生物	C18	Others	-	-	-	M+H	C12H18O4	5.4627166666699996	-	-	pos	-	-	-	-	-	-	227.12759614599997	0.00297509419536	50.7	-0.83735	-	-	3.7102814078699993	3.64231	3.70992	3.81461	3.78635	3.8096	3.58105	3.54897	3.59787
pos_3944	(E)-endo-beta-bergamotenoic acid	-	metab_3835	B(i)	81.5	0	Terpenoids	萜类	Monoterpenoids	单萜	C18	Secondary metabolite	-	-	-	M+H	C15H22O2	5.4627166666699996	-	-	pos	-	-	-	-	-	-	235.169	0.00186837280945	55.3	-0.486226	-	-	3.97481	3.93973	3.92586	3.95498	3.93546	3.89912	4.09223	4.072	4.13524
pos_3951	Thr-Trp-Leu	-	metab_3842	B(i)	36	0	Others	其他类	Others	其他类	C18	Others	-	-	-	M+Na	C21H30N4O5	5.4627166666699996	-	-	pos	-	-	-	-	-	-	441.212	0.00172303279058	46.4	1.7886144349591597	-	-	3.4251408928500005	3.42155	3.42917	4.10489	4.09577	4.1051	4.83887	4.84115	4.8499
pos_3953	2'',4'',6''-Triacetylglycitin	2″，4″，6″-三乙酰甘氨酸	metab_3844	B(ii)	0	75.7	Flavonoids	类黄酮	Isoflavones	异黄酮	C18	Secondary metabolite	-	-	HMDB0034694	M+Na	C28H28O13	5.4627166666699996	-	-	pos	-	-	-	-	Phenylpropanoids and polyketides	Isoflavonoids	595.146	0.0033817381996999996	53.1	6.9221040602568795	-	Isoflavonoid O-glycosides	3.70232	3.7089	3.69416	3.62597	3.58235	3.51976	3.21608	3.10555	3.17235
pos_3959	4-n-Pentylphenol	-	metab_3850	B(i)	87.9	0	Others	其他类	Others	其他类	C18	Others	-	-	-	M+H	C11H16O	5.4857	-	C14466	pos	-	-	-	-	-	-	165.127	0.0020728457969499997	57.2	-0.0692566	14938-35-3	-	3.52223	3.49076	3.50366	3.63285	3.63256	3.60374	3.94672	3.931458955330001	3.97132
pos_3961	Beta-Thujaplicin	桧木醇	metab_3852	B(ii)	0	55.9	Others	其他类	Others	其他类	C18	Others	-	-	HMDB0035213	M+CH3OH+H	C10H12O2	5.4857	-	C09904	pos	-	-	-	-	Hydrocarbon derivatives	Tropones	197.117	0.0012889222681099998	50.9	-0.0324401	499-44-5	Tropolones	4.14466	4.16379	4.15377	4.169684643959998	4.13548	4.15832	4.03034	4.05143	4.08484
pos_3962	(+)-Oxyglutinosone	-	metab_3853	B(i)	57.8	0	Others	其他类	Others	其他类	C18	Others	-	-	-	M+H	C14H20O3	5.4857	-	-	pos	-	-	-	-	-	-	237.148	0.00035567232759900003	50.1	-0.638102	-	-	4.11319	4.12125	4.10832	4.09623	4.05328	4.03788	4.45908	4.46391	4.477048437580001
pos_3986	Hyp-Ser	-	metab_3877	B(ii)	0	45.7	Others	其他类	Others	其他类	C18	Others	-	-	HMDB0028872	M+CH3OH+H	C8H14N2O5	5.531516666669999	-	-	pos	-	-	-	-	Organic acids and derivatives	Carboxylic acids and derivatives	251.125	0.0029350988257700003	46.6	7.7165701882055995	-	Amino acids, peptides, and analogues	3.6563	3.63622	3.61895	3.94404	3.93612	3.89875	4.18312	4.180314472219998	4.17077
pos_3987	(+)-cis-abscisic aldehyde	（+）-顺式脱落醛	metab_3878	B(ii)	0	69.5	Terpenoids	萜类	Sesquiterpenoids	倍半萜	C18	Secondary metabolite	map01100;map00906;map01110	Metabolic pathways;Carotenoid biosynthesis;Biosynthesis of secondary metabolites	HMDB0303940	M+NH4	C15H20O3	5.531516666669999	代谢途径;类胡萝卜素生物合成;次级代谢产物的生物合成	C13455	pos	-	-	Metabolism;Metabolism;Metabolism	Global and overview maps;Metabolism of terpenoids and polyketides;Global and overview maps	Lipids and lipid-like molecules	Prenol lipids	266.175	0.007527842658209999	53.1	-0.843718	-	Sesquiterpenoids	1.83233	2.22323	2.11417	0.0474484223872	2.0853528220599995	1.89283	0.0467294056217	0.08914158746050001	0.0863435291469
pos_4013	Dumetorine	-	metab_3904	B(ii)	0	40	Others	其他类	Others	其他类	C18	Others	-	-	HMDB0030268	M+H	C13H21NO2	5.577533333330001	-	-	pos	-	-	-	-	Organoheterocyclic compounds	Pyrans	224.164	0.0013563974120399998	47.2	-0.756594	96552-67-9	Pyranones and derivatives	2.99538	2.97006	2.90343	3.20331	3.26747	3.2111427369200003	2.55436	2.65757	2.30052
pos_4034	O-Cymol	-	metab_3925	B(i)	89.2	0	Others	其他类	Others	其他类	C18	Others	-	-	HMDB0037050	M+H	C10H14	5.623533333330001	-	-	pos	-	-	-	-	Benzenoids	Benzene and substituted derivatives	135.117	0.0005862885919	57.6	0.263051752199804	527-84-4	Cumenes	4.56335	4.571444125709999	4.594116487780001	5.00162	5.018275033419999	5.002	5.026071630430001	5.02061	5.01932
pos_4043	Astilbin	落新妇苷	metab_3934	B(i)	50.4	0	Flavonoids	类黄酮	Flavonoid glycosides	黄酮糖苷	C18	Secondary metabolite	-	-	HMDB0033850;HMDB0242667	M+H-2H2O	C21H22O11	5.623533333330001	-	C17449	pos	-	-	-	-	Phenylpropanoids and polyketides	Flavonoids	415.10212301300004	0.0008962814783969999	49.4	-0.523349	29838-67-3	Flavonoid glycosides	3.74463	3.75082	3.69096	3.86881	3.86164	3.85624	2.769	2.88791	2.92111
pos_4051	Coronafacic acid	-	metab_3942	B(i)	73.3	0	Others	其他类	Ketones and derivatives	酮类及其衍生物	C18	Others	-	-	-	M+H	C12H16O3	5.646433333330001	-	C15765	pos	-	-	-	-	-	-	209.117	0.00155754742016	54.2	0.0333367670008618	62251-98-3	-	3.8522	3.8671	3.9006	3.90445	3.91601	3.9130700215300007	3.74124	3.79535	3.79631
pos_4052	Isospathulenol	异匙叶桉油烯醇	metab_3943	B(ii)	0	57.6	Terpenoids	萜类	Sesquiterpenoids	倍半萜	C18	Secondary metabolite	-	-	HMDB0034718	M+H	C15H24O	5.646433333330001	-	-	pos	-	-	-	-	Lipids and lipid-like molecules	Prenol lipids	221.19	0.000930592948454	50.9	-0.557393	88395-46-4	Sesquiterpenoids	4.27421	4.27866	4.29682	4.60269	4.64109	4.60227	5.087769457519999	5.08926	5.0831
pos_4054	Palatinose	帕拉金糖	metab_3945	B(i)	72.8	0	Carbohydrates and derivatives	碳水化合物及其衍生物	O-glycosyl compounds	O-糖基化合物	C18	Primary metabolite	-	-	HMDB0256083	M+H-H2O	C12H22O11	5.646433333330001	-	C01742	pos	Carbohydrates	Oligosaccharides	-	-	Organic oxygen compounds	Organooxygen compounds	325.11277621799996	0.008924765290260001	53.9	-0.429832	13718-94-0	Carbohydrates and carbohydrate conjugates	2.83005	2.96944	3.0516	3.42018	3.55768	3.5208924934599994	2.83686	2.66674	2.8885782310000003
pos_4056	Flumethasone	氟米松	metab_3947	B(ii)	0	82.1	Steroids and steroid derivatives	甾体及其衍生物	Hydroxysteroids	羟基甾体	C18	Secondary metabolite	-	-	HMDB0252336	M+H	C22H28F2O5	5.646433333330001	-	C14479	pos	-	-	-	-	Lipids and lipid-like molecules	Steroids and steroid derivatives	411.201	0.000359300688975	53.6	8.178546751940779	2135-17-3	Hydroxysteroids	1.5966444053600002	1.60101	1.6102146627399998	1.70322	1.69152	1.6978663121700002	1.69637	1.70015	1.69371
pos_4072	7-Angeloylplatynecine	-	metab_3962	B(i)	60.3	0	Others	其他类	Others	其他类	C18	Others	-	-	-	M+H	C13H21NO3	5.692316666669999	-	-	pos	-	-	-	-	-	-	240.159	0.000584598873353	51.3	-0.998168	-	-	3.57299	3.5737129992300005	3.54184	3.67404	3.65959	3.6245	2.7487214741100003	2.79476	2.65179
pos_4076	Arg-Ser-Ala	-	metab_3966	B(i)	47.1	0	Others	其他类	Others	其他类	C18	Others	-	-	-	M+Na	C12H24N6O5	5.692316666669999	-	-	pos	-	-	-	-	-	-	355.17308264400003	0.00037940969787499996	46.7	9.163888037467329	-	-	4.6807485921900005	4.664568668859999	4.68898	5.02983	5.0674	5.04754	4.84983	4.83949	4.83596
pos_4084	Delta-dodecalactone	-	metab_3974	B(i)	42.2	0	Others	其他类	Lactones	内酯类	C18	Others	-	-	HMDB0037742;LMFA07040040	M+H	C12H22O2	5.71528	-	-	pos	-	-	-	-	Organoheterocyclic compounds	Lactones	199.169	0.00273116573391	47.3	-0.174237	3051-22-7	Delta valerolactones	4.20479	4.2602858153400005	4.28328	4.1356914209800015	4.1588838689999985	4.14367	4.18787	4.247724047019998	4.18008
pos_4095	4-Hydroxy-4-(3-hydroxy-1-butenyl)-3,5,5-trimethyl-2-cyclohexen-1-one	-	metab_3983	B(i)	62.2	0	Terpenoids	萜类	Sesquiterpenoids	倍半萜	C18	Secondary metabolite	-	-	-	M+H-H2O	C13H20O3	5.7609833333300005	-	-	pos	-	-	-	-	-	-	207.138	0.00944748373491	51.7	0.441549683180545	-	-	3.47387	3.49283	3.5007817015800007	3.50683	3.49394	3.49715	3.85933	3.9566	3.8671
pos_4103	Viridiene	-	metab_3991	B(i)	88.9	0	Others	其他类	Hydrocarbons and derivatives	烃类及其衍生物	C18	Others	-	-	-	M+H	C11H14	5.7838333333300005	-	-	pos	-	-	-	-	-	-	147.117	0.000986586898181	57.3	-0.276511	-	-	4.00026	4.01403	4.01502	4.2854286314599985	4.2728746730400005	4.27461	4.3368	4.37596	4.3610512442300005
pos_4104	2-decenal	2-癸烯醛	metab_3992	B(i)	38.4	0	Others	其他类	Aldehydes and derivatives	醛类及其衍生物	C18	Others	-	-	HMDB0030999;LMFA06000053	M+H	C10H18O	5.7838333333300005	-	-	pos	-	-	-	-	Organic oxygen compounds	Organooxygen compounds	155.143	0.00516679295188	47.2	-0.386707	3913-71-1	Carbonyl compounds	3.21114	3.21331	3.2233	3.09626	3.05341	3.09852	3.27466	3.30679	3.23903
pos_4106	Piquerol A	-	metab_3994	B(i)	76.6	0	Terpenoids	萜类	Monoterpenoids	单萜	C18	Secondary metabolite	-	-	-	M+H	C10H14O2	5.7838333333300005	-	C09887	pos	-	-	-	-	-	-	167.107	0.0007718523208390001	54.9	-0.11919	32151-10-3	-	4.03552	4.03768	4.04333	4.15381	4.13425	4.17275	4.13604	4.15487	4.14114
pos_4107	4,7-Dimethyl-1-tetralone	-	metab_3995	B(i)	86.9	0	Others	其他类	Others	其他类	C18	Others	-	-	-	M+H	C12H14O	5.7838333333300005	-	-	pos	-	-	-	-	-	-	175.112	0.0007779553767629999	57.1	-0.0140183	-	-	4.278300540769998	4.28905	4.28692	4.56316	4.55263	4.57695	4.42205	4.43246	4.42779
pos_4108	Sedanonic acid lactone	-	metab_3996	B(i)	93.4	0	Others	其他类	Others	其他类	C18	Others	-	-	-	M+H	C12H16O2	5.7838333333300005	-	C17875	pos	-	-	-	-	-	-	193.12234326900003	0.000572533908989	58.4	0.193034485914797	-	-	4.981782855940001	4.98983	4.995661086619998	5.27707	5.26686	5.28072	5.09201	5.1137486050300005	5.110921834709999
pos_4109	Jasmonic acid	茉莉酮酸	metab_3997	B(i)	98	0	Lipids	脂质	Fatty Acyls	脂肪酰类	C18	Primary metabolite	map01100;map00592;map01110;map04075	Metabolic pathways;alpha-Linolenic acid metabolism;Biosynthesis of secondary metabolites;Plant hormone signal transduction	HMDB0032797;LMFA02020001	M+H	C12H18O3	5.7838333333300005	代谢途径;α-亚麻酸代谢;次级代谢产物的生物合成;植物激素信号转导	C08491	pos	-	-	Metabolism;Metabolism;Metabolism;Environmental Information Processing	Global and overview maps;Lipid metabolism;Global and overview maps;Signal transduction	Lipids and lipid-like molecules	Fatty Acyls	211.133	0.000568098586308	59.2	-0.499903	6894-38-8;59366-47-1	Lineolic acids and derivatives	5.580240593099999	5.589456223559999	5.5913017076900005	5.94905	5.93922	5.95152	5.73544	5.75279	5.75044
pos_4112	Qing Hau Sau	-	metab_4000	B(i)	84	0	Others	其他类	Others	其他类	C18	Others	-	-	-	M+H	C15H22O5	5.7838333333300005	-	C09538	pos	-	-	-	-	-	-	283.152	0.00152524753988	54.2	-7.84184	63968-64-9	-	4.92036	4.93476	4.92113	5.02438	5.02253	5.03307	4.87354	4.90132	4.90096
pos_4128	8-hydroxy-13Z-octadecene-9,11-diynoic acid	-	metab_4016	B(i)	80.7	0	Lipids	脂质	Fatty Acyls	脂肪酰类	C18	Primary metabolite	-	-	LMFA02000199	M+H	C18H26O3	5.8295833333300004	-	-	pos	-	-	-	-	-	-	291.19520874299997	0.0013433939511099998	54.7	-0.904176	-	-	4.1175450063999985	4.12261	4.15603	4.27098	4.2643350459199985	4.30898	4.25847	4.26238	4.25925
pos_4140	Dihydrohypnophilin	-	metab_4028	B(i)	44.5	0	Terpenoids	萜类	Sesquiterpenoids	倍半萜	C18	Secondary metabolite	-	-	-	M+H	C15H22O3	5.85248	-	-	pos	-	-	-	-	-	-	251.164	0.0030868744356099998	48.1	-1.01019	-	-	3.73461	3.7441	3.76497	3.84263	3.82712	3.81806	3.88627	3.90859	3.900686206730001
pos_4147	4,5-Dihydrovomifoliol	4,5-二氢布卢门醇A	metab_4034	B(ii)	0	78.1	Terpenoids	萜类	Sesquiterpenoids	倍半萜	C18	Secondary metabolite	-	-	HMDB0040615	M+H-H2O	C13H22O3	5.87538	-	-	pos	-	-	-	-	Lipids and lipid-like molecules	Prenol lipids	209.154	0.000921226951327	55.2	-0.0951032	142173-08-8	Sesquiterpenoids	4.313600630380002	4.320815531469998	4.32824	4.57701	4.56694	4.61572	5.18912	5.1784	5.17174
pos_4152	Keyakinol	-	metab_4039	B(i)	79.1	0	Flavonoids	类黄酮	Flavonoid glycosides	黄酮糖苷	C18	Secondary metabolite	-	-	-	M+H	C22H24O11	5.87538	-	-	pos	-	-	-	-	-	-	465.13662640800004	0.0023041121030199997	53.9	-5.41141	-	-	2.89561	3.0598176013700003	2.9182636000700004	4.4149822186500005	4.39234	4.416590594830001	4.56678	4.59414	4.57007
pos_4154	2,3,6,7-Tetrahydro-7-methylcyclopent[b]azepin-8(1H)-one	2,3,6,7-四氢-7-甲基环戊并[b]氮杂-8（1H）-酮	metab_4041	B(ii)	0	47.9	Others	其他类	Others	其他类	C18	Others	-	-	HMDB0039661	M+H	C10H13NO	5.898333333330001	-	-	pos	-	-	-	-	Organoheterocyclic compounds	Azepines	164.107	0.00124932655105	47.4	0.0458069597570247	97826-67-0	Not Available	5.07679	5.05493	5.077223903169999	4.89542	4.88432	4.88909	4.35358	4.37496	4.36228
pos_4158	Trp-Lys	-	metab_4045	B(i)	52.5	0	Others	其他类	Others	其他类	C18	Others	-	-	HMDB0029088	M+H	C17H24N4O3	5.898333333330001	-	-	pos	-	-	-	-	Organic acids and derivatives	Carboxylic acids and derivatives	333.19071297700003	0.00127953372099	48.5	-4.22687	-	Amino acids, peptides, and analogues	1.76547	1.7698709185599997	1.77916	1.87284	1.86106	1.86745	1.8659395776900003	1.86975	1.86326
pos_4169	Bhos#20	-	metab_4056	B(i)	59.3	0	Carbohydrates and derivatives	碳水化合物及其衍生物	Other carbohydrates and derivatives	其他类碳水化合物及其衍生物	C18	Primary metabolite	-	-	LMFA13040083	M+H-2H2O	C18H34O7	5.93705	-	-	pos	-	-	-	-	-	-	327.216	0.0015088694543800003	49.4	-0.6465	-	-	3.88074	3.84543	3.78598	4.03579	4.01867	4.05513	3.96805	4.00052	3.966616976540001
pos_4173	Benzylazanium	-	metab_4060	B(i)	39.1	0	Others	其他类	Amines and derivatives	胺类及其衍生物	C18	Others	-	-	-	M+K	C7H10N+	5.952983333330001	-	-	pos	-	-	-	-	-	-	147.044	0.00396556102402	46.6	-4.25902	-	-	2.59549	2.67089	2.6194060882900003	3.25173	3.2726	3.2925204149400003	3.94654	3.94305	3.90525
pos_4183	4-Isopropylbenzaldehyde	-	metab_4070	B(i)	69.3	0	Terpenoids	萜类	Monoterpenoids	单萜	C18	Secondary metabolite	map01100	Metabolic pathways	HMDB0002214	M+CH3OH+H	C10H12O	5.975816666669999	代谢途径	C06577	pos	-	-	Metabolism	Global and overview maps	Lipids and lipid-like molecules	Prenol lipids	181.12226179700002	0.00614089915067	53.6	-0.299732	122-03-2	Monoterpenoids	3.38937	3.45011	3.45872	3.52874	3.47082	3.59282	3.58875	3.53694	3.54726
pos_4190	Stagonolide	-	metab_4077	B(i)	39.8	0	Others	其他类	Others	其他类	C18	Others	-	-	-	M+H	C12H18O4	5.99525	-	-	pos	-	-	-	-	-	-	227.128	0.00566386282655	47.4	-0.733367	-	-	3.37802	3.31966	3.41822	3.4547083364099995	3.48441	3.4687917679400004	3.51578	3.48249	3.4836
pos_4195	1,1,5-trimethyl-1,2-dihydronaphthalene	-	metab_4082	B(i)	87.8	0	Others	其他类	Naphthalenes	萘类	C18	Others	-	-	-	M+H	C13H16	6.013	-	-	pos	-	-	-	-	-	-	173.13258860599998	0.00269254813339	56.6	0.6487208113155439	-	-	2.8069371692900003	2.61057	2.75597	3.38477	3.36022	3.42305	4.01726	3.97879	3.98075
pos_4197	Taraxinic acid glucosyl ester	β-D-葡萄糖基糖基他拉辛酸酯	metab_4084	B(ii)	0	40.3	Others	其他类	Others	其他类	C18	Others	-	-	HMDB0035249	M+CH3OH+Na	C21H28O9	6.013	-	-	pos	-	-	-	-	Lipids and lipid-like molecules	Prenol lipids	479.18908156599997	0.012925645759999998	47	0.822994294112552	75911-14-7	Terpene lactones	0.523946	0.527085	2.02759	3.903686886590001	3.88156	3.90729	4.60423	4.58178	4.58397
pos_4206	12-Hydroxydodecanoic acid	12-羟基十二酸	metab_4093	B(i)	66.8	0	Organic acids and derivatives	有机酸及其衍生物	Organic acids and derivatives	有机酸及其衍生物	C18	Secondary metabolite	-	-	HMDB0002059	M+H-2H2O	C12H24O3	6.05185	-	C08317	pos	-	-	-	-	Organic acids and derivatives	Hydroxy acids and derivatives	181.159	0.012180613125100001	52.7	-0.418193	505-95-3	Medium-chain hydroxy acids and derivatives	3.1246012697500003	3.10122	3.0884	3.10317	3.0358852299400003	3.12175	3.12036	3.10821	3.15918
pos_4213	(-)-Nopol	（-）-诺波尔	metab_4100	B(ii)	0	40.6	Terpenoids	萜类	Monoterpenoids	单萜	C18	Secondary metabolite	-	-	HMDB0030002	M+H	C11H18O	6.0732666666699995	-	-	pos	-	-	-	-	Lipids and lipid-like molecules	Prenol lipids	167.143	0.00476031129577	45.8	-0.00172986	35836-73-8	Monoterpenoids	3.25925	3.2129	3.22505	3.62267	3.62674	3.619	3.60673	3.5928	3.57633
pos_4221	3-Ethyltoluene	-	metab_4108	B(i)	83.9	0	Others	其他类	Others	其他类	C18	Others	-	-	HMDB0059848	M+H	C9H12	6.096166666669999	-	C14522	pos	-	-	-	-	Benzenoids	Benzene and substituted derivatives	121.101	0.00261449179234	56	1.28685744296304	620-14-4	Toluenes	3.93419	3.9461080484199993	3.94065	4.10603	4.0869	4.12282	4.22758	4.232157320330002	4.21688
pos_4223	Desmarestene	-	metab_4110	B(i)	91.7	0	Others	其他类	Hydrocarbons and derivatives	烃类及其衍生物	C18	Others	-	-	-	M+H	C11H14	6.096166666669999	-	-	pos	-	-	-	-	-	-	147.117	0.00137897184614	57.8	-0.15804	-	-	3.92306	3.8938532540400006	3.91727	4.03714	4.0379204598500005	4.04987	4.16832	4.17685	4.1628
pos_4224	Carvacrol	香芹酚	metab_4111	B(i)	45.2	0	Terpenoids	萜类	Monoterpenoids	单萜	C18	Secondary metabolite	-	-	HMDB0035770;HMDB0038707;HMDB0035770;LMPR0102090017	M+H	C10H14O	6.096166666669999	-	C09840	pos	-	-	-	-	Lipids and lipid-like molecules	Prenol lipids	151.11168090299998	0.00442935436185	48.3	-0.403705	499-75-2	Monoterpenoids	3.82246	3.84615	3.83315	3.92454	3.92116	3.98883	4.13887	4.1495986385900006	4.12348
pos_4225	Ethyl 2Z,4E-decadienoic acid	2Z，4E -癸二烯酸乙酯	metab_4112	B(ii)	0	51.9	Lipids	脂质	Fatty Acyls	脂肪酰类	C18	Primary metabolite	-	-	HMDB0036599	M+H-2H2O	C12H20O2	6.096166666669999	-	C08486	pos	-	-	-	-	Lipids and lipid-like molecules	Fatty Acyls	161.132	0.00200386320053	48.8	-0.366215	3025-30-7	Fatty acid esters	4.087219515269998	4.12434	4.0964237262199985	4.17106	4.13964	4.17532	4.225	4.26938	4.239
pos_4229	Daucol	胡萝卜醇	metab_4116	B(ii)	0	68.1	Others	其他类	Others	其他类	C18	Others	-	-	HMDB0035287	M+H	C15H26O2	6.096166666669999	-	C09652	pos	-	-	-	-	Organoheterocyclic compounds	Oxanes	239.2	0.0017800865339000001	52.9	-1.01034	887-08-1	Not Available	3.71026	3.7150194921699993	3.7445	3.7636	3.7367	3.793680363540001	3.96372	3.9397	3.97111
pos_4230	(S)-a-Amino-2,5-dihydro-5-oxo-4-isoxazolepropanoic acid N2-glucoside	（S） -α-氨基-2,5-二氢-5-氧代-4-异恶唑丙酸N2-葡萄糖苷	metab_4117	B(ii)	0	53.2	Carbohydrates and derivatives	碳水化合物及其衍生物	Other carbohydrates and derivatives	其他类碳水化合物及其衍生物	C18	Primary metabolite	-	-	HMDB0029404	M+NH4	C12H18N2O9	6.096166666669999	-	-	pos	-	-	-	-	Organic oxygen compounds	Organooxygen compounds	352.13274520199997	0.00192412115784	47.8	-6.91554	29790-46-3	Carbohydrates and carbohydrate conjugates	2.34772	2.35217	2.36157	2.45631	2.44441	2.45086	2.44934	2.45319	2.44663
pos_4239	Neryl propionate	丙酸橙花酯	metab_4126	B(ii)	0	59.3	Lipids	脂质	Fatty Acyls	脂肪酰类	C18	Primary metabolite	-	-	HMDB0038258	M+H-2H2O	C13H22O2	6.119033333330001	-	-	pos	-	-	-	-	Lipids and lipid-like molecules	Fatty Acyls	175.148	0.000906261558473	51.3	-0.187329	105-91-9	Fatty alcohol esters	3.09343	3.08869	3.13243	3.4469505673800005	3.43678	3.4872404021900003	3.96768	3.95014	3.949
pos_4246	10beta-12,13-Dinor-8-oxo-6-eremophilen-11-al	10beta-12,13-二去甲-8-氧代-6-嗜热-11-醚	metab_4133	B(ii)	0	49.4	Others	其他类	Others	其他类	C18	Others	-	-	HMDB0037604	M+H	C13H18O2	6.141916666669999	-	-	pos	-	-	-	-	Organic oxygen compounds	Organooxygen compounds	207.138	0.00384725873004	49.4	0.211565238631841	348119-86-8	Carbonyl compounds	3.14314	3.10975	3.13139	3.30928	3.24988	3.32504	3.85014	3.85502	3.84983
pos_4252	Threo-Guaiacylglycerol beta-coniferyl ether	-	metab_4139	B(i)	37.4	0	Lignans and derivatives	木脂素类及其衍生物	Lignans and derivatives	木脂素类及其衍生物	C18	Secondary metabolite	-	-	-	M+H	C20H24O7	6.141916666669999	-	-	pos	-	-	-	-	-	-	377.15678222099996	0.00235915164085	44.7	-7.17081	-	-	2.43639	2.44085	2.4502578667200003	2.54506	2.53315	2.53961	2.5380870473400003	2.54194	2.53538
pos_4263	Olivin	橄榄石	metab_4149	B(ii)	0	44.7	Flavonoids	类黄酮	Chalcones	查尔酮	C18	Secondary metabolite	-	-	HMDB0033797	M+CH3OH+H	C17H16O6	6.16308	-	-	pos	-	-	-	-	Phenylpropanoids and polyketides	Linear 1,3-diarylpropanoids	349.128	0.00477104892907	48.2	-0.651815	-	Chalcones and dihydrochalcones	1.58561	1.5899661245200003	1.5991693430200002	1.69212	1.68042	1.68677	1.68527	1.68905	1.6826127038499998
pos_4267	Repandiol	-	metab_4153	B(ii)	0	42.2	Others	其他类	Others	其他类	C18	Others	-	-	HMDB0039606	M+H-H2O	C10H10O4	6.180766666669999	-	-	pos	-	-	-	-	Organoheterocyclic compounds	Epoxides	177.055	0.00215798327556	48	-0.189916	147921-90-2	Not Available	2.8509836122400003	2.99852	3.0105586431299995	3.65844	3.64416	3.71631	4.4508367710000005	4.49519	4.4917
pos_4269	Tianshic acid methylester	-	metab_4155	B(i)	92.1	0	Lipids	脂质	Fatty Acyls	脂肪酰类	C18	Primary metabolite	-	-	-	M+H	C19H36O5	6.180766666669999	-	-	pos	-	-	-	-	-	-	345.263	0.00706605517817	57.5	-0.43963	-	-	3.60597	3.5421186191300005	3.5794304352699995	3.7384	3.73789	3.73044	3.85972	3.83869	3.9177
pos_4272	Mgdg(8:0/8:0)	-	metab_4158	B(i)	41.4	0	Others	其他类	Others	其他类	C18	Others	-	-	-	M+H	C25H46O10	6.180766666669999	-	-	pos	-	-	-	-	-	-	507.31647741300003	0.0050990975142	47.8	0.20404521268657896	-	-	3.9408	3.93086	3.98667	3.97384	3.93193	4.005921611530002	4.08977	4.1286339099300005	4.15035
pos_4275	Boschnialactone	-	metab_4161	B(i)	57	0	Others	其他类	Others	其他类	C18	Others	-	-	-	M+H-H2O	C9H14O2	6.196733333330001	-	C09772	pos	-	-	-	-	-	-	137.096	0.00357482552899	50.5	0.19895365069906198	17957-87-8	-	3.986418262940001	3.9744	3.97735	4.31381	4.29862	4.31738	4.39354	4.44615	4.41097
pos_4277	(S,E)-Zearalenone	（S，E）-玉米赤霉烯酮	metab_4163	B(ii)	0	68	Others	其他类	Macrolides and derivatives	大环内酯类及其衍生物	C18	Others	-	-	HMDB0031752	M+H	C18H22O5	6.196733333330001	-	C09981	pos	-	-	-	-	Phenylpropanoids and polyketides	Macrolides and analogues	319.154	0.00247676844968	52.7	-0.605818	17924-92-4	Zearalenones	2.0055	1.7978	1.68348	1.88833	2.02961	1.6411140898899998	1.18881	1.79332	1.7893386454599998
pos_4285	3-Hydroxy-alpha-ionone	-	metab_4171	B(i)	66.9	0	Terpenoids	萜类	Sesquiterpenoids	倍半萜	C18	Secondary metabolite	-	-	-	M+H	C13H20O2	6.2127	-	-	pos	-	-	-	-	-	-	209.15355016400002	0.0031013410314099997	52.9	-0.269754	-	-	3.85121	3.87838	3.88106	3.93625	3.95698	4.00646	4.4672	4.521116072180001	4.49033
pos_4309	Pseudoionone	假紫罗酮	metab_4193	B(i)	88.8	0	Terpenoids	萜类	Monoterpenoids	单萜	C18	Secondary metabolite	-	-	HMDB0032498	M+H	C13H20O	6.276466666669999	-	-	pos	-	-	-	-	Lipids and lipid-like molecules	Prenol lipids	193.159	0.0017050883401400002	57.3	0.428210452703323	3548-78-5	Monoterpenoids	3.76794	3.76461	3.76104	3.92784	3.95104	3.96145	4.29914	4.32015	4.28808
pos_4324	3-Acetyldeoxynivalenol	3-乙酰脱氧雪腐镰孢菌烯醇	metab_4208	B(i)	40.8	0	Terpenoids	萜类	Sesquiterpenoids	倍半萜	C18	Secondary metabolite	-	-	HMDB0036137	M+CH3OH+Na	C17H22O7	6.335233333330001	-	-	pos	-	-	-	-	Lipids and lipid-like molecules	Prenol lipids	393.154	0.00469838967082	45.7	6.563032940834059	50722-38-8	Sesquiterpenoids	2.18137	2.1858148714200003	2.1951973862400003	2.28976	2.27788	2.28432	2.2828	2.28664	2.2801
pos_4329	Citronellyl acetate	-	metab_4212	B(i)	48.9	0	Lipids	脂质	Fatty Acyls	脂肪酰类	C18	Primary metabolite	-	-	HMDB0034160;HMDB0034844;LMFA07010812;LMPR0102010015	M+H	C12H22O2	6.344233333330001	-	C12298	pos	-	-	-	-	Lipids and lipid-like molecules	Fatty Acyls	199.16923628900003	0.00148219332138	48.7	-0.101372	150-84-5	Fatty alcohol esters	4.77157	4.78338	4.79386	4.74889	4.75601	4.75003	4.8436	4.86908	4.85565
pos_4330	2,3-Dehydroillifunone	-	metab_4213	B(i)	39.7	0	Others	其他类	Others	其他类	C18	Others	-	-	-	M+H	C14H18O4	6.344233333330001	-	-	pos	-	-	-	-	-	-	251.12764641200002	0.00899155270509	47.4	-0.556034	-	-	2.5132947595900004	2.46122	2.16588	2.5333	2.68179	2.70731	2.91917	3.03695	2.96417
pos_4334	Ser-Gly	-	metab_4217	B(i)	48.7	0	Amino acids and derivatives	氨基酸及其衍生物	Dipeptides	二肽	C18	Primary metabolite	-	-	HMDB0029039	M+CH3OH+H	C5H10N2O4	6.36015	-	-	pos	-	-	-	-	Organic acids and derivatives	Carboxylic acids and derivatives	195.099	0.00400998265532	46.7	9.926971668590868	687-63-8	Amino acids, peptides, and analogues	3.59659	3.63682	3.62627	3.68562	3.64547	3.68176	3.71493	3.77499	3.74728
pos_4343	Farnesylcysteine	法尼基半胱氨酸	metab_4226	B(ii)	0	43.4	Terpenoids	萜类	Sesquiterpenoids	倍半萜	C18	Secondary metabolite	map01110;map00900	Biosynthesis of secondary metabolites;Terpenoid backbone biosynthesis	HMDB0011627	M+H-H2O	C18H31NO2S	6.383183333330001	次级代谢产物的生物合成;萜类骨架生物合成	C19691	pos	-	-	Metabolism;Metabolism	Global and overview maps;Metabolism of terpenoids and polyketides	Lipids and lipid-like molecules	Prenol lipids	308.207	0.00664817006224	38.1	7.109663654564941	68000-92-0	Sesquiterpenoids	3.83648	3.823	3.79443	3.90115	3.87719	3.89782	3.81824	3.80167	3.79657
pos_4347	Gamma-CEHC glucuronide	-	metab_4230	B(ii)	0	61.6	Carbohydrates and derivatives	碳水化合物及其衍生物	Glycosides	糖苷类	C18	Primary metabolite	-	-	HMDB0242175	M+H	C21H28O10	6.383183333330001	-	-	pos	-	-	-	-	Organic oxygen compounds	Organooxygen compounds	441.173	0.00198222859062	50.2	-5.68917	-	Carbohydrates and carbohydrate conjugates	5.08251	5.07871	5.08658	5.736113176919999	5.75366	5.71009	5.30888	5.35342	5.31149
pos_4361	(-)-Rel-acora-2,4(14),8-trien-15-oic acid	-	metab_4244	B(i)	75.9	0	Organic acids and derivatives	有机酸及其衍生物	Organic acids and derivatives	有机酸及其衍生物	C18	Secondary metabolite	-	-	-	M+H	C15H20O2	6.446783333330001	-	-	pos	-	-	-	-	-	-	233.15349511099998	0.006354661823090001	54.6	-0.479015	-	-	2.9210128892400005	2.94896	2.90218	3.02309	3.00087	2.9756	3.04286	3.0653768662800003	2.94256
pos_4362	Madolin B	-	metab_4245	B(i)	73.2	0	Others	其他类	Others	其他类	C18	Others	-	-	-	M+H	C15H22O3	6.446783333330001	-	-	pos	-	-	-	-	-	-	251.164	0.00208009547284	53.9	-0.657259	-	-	3.26862	3.1749	3.29657	3.29094	3.25626	3.26482	3.3819239648900004	3.40427	3.36083
pos_4367	12-Hydroxyjasmonic acid	-	metab_4250	B(i)	86.9	0	Lipids	脂质	Fatty Acyls	脂肪酰类	C18	Primary metabolite	-	-	LMFA02020011	M+H	C12H18O4	6.466183333330001	-	C21669	pos	-	-	-	-	-	-	227.128	0.0035743388016499997	56.8	-0.727953	-	-	4.3106	4.30134	4.29242	4.52066	4.5039341959699986	4.53513	4.24816	4.30226	4.29965
pos_4369	Russulanorol	-	metab_4252	B(i)	68.2	0	Others	其他类	Others	其他类	C18	Others	-	-	-	M+H	C14H22O4	6.466183333330001	-	-	pos	-	-	-	-	-	-	255.159	0.00212081854207	53.1	-0.662766	-	-	4.37163	4.37848	4.37321	3.949	3.9561	3.98016	3.9851	4.05195	3.98328
pos_4380	Alpha-Damascone	-	metab_4263	B(ii)	0	53.3	Others	其他类	Others	其他类	C18	Others	-	-	HMDB0036027	M+H-H2O	C13H20O	6.50145	-	-	pos	-	-	-	-	Organic oxygen compounds	Organooxygen compounds	175.14813113900001	0.007942828804610001	50.3	0.0214857053571019	116497-11-1	Carbonyl compounds	2.81956	2.8132	2.78219	2.9738699808999995	2.98171	2.9562028008700003	3.79884	3.83457	3.79074
pos_4387	Norecasantalol	去甲斑蝥素	metab_4270	B(i)	65.4	0	Terpenoids	萜类	Monoterpenoids	单萜	C18	Secondary metabolite	-	-	HMDB0036815	M+H	C11H18O	6.519183333330001	-	-	pos	-	-	-	-	Lipids and lipid-like molecules	Prenol lipids	167.143	0.00295383226658	52.7	-0.074167	59460-65-0	Monoterpenoids	4.10754	4.1239	4.12059	3.83897	3.82609	3.84201	4.0897	4.13496	4.10636
pos_4388	Gallicynoic acid F	-	metab_4271	B(i)	84.2	0	Lipids	脂质	Fatty Acyls	脂肪酰类	C18	Primary metabolite	-	-	LMFA01050573	M+H-H2O	C18H32O6	6.519183333330001	-	-	pos	-	-	-	-	-	-	327.216	0.00521508107429	55.9	-0.61109	-	-	4.037646495980002	4.06183	4.03463	4.19173	4.1876357243800015	4.19534	4.04061	4.068511073530002	4.0557132965300005
pos_4395	Alpha-terpineol	-	metab_4278	B(i)	40.3	0	Others	其他类	Others	其他类	C18	Others	-	-	HMDB0004043	M+H	C10H18O	6.533366666669999	-	C16772;C09902	pos	-	-	-	-	Lipids and lipid-like molecules	Prenol lipids	155.143	0.0130006987793	47.7	-0.230786	98-55-5;7785-53-7	Monoterpenoids	2.57324	2.50629	2.61367	2.65158	2.61618	2.67652	2.67095	2.7466523940599994	2.63339
pos_4402	Trans-O-Methylgrandmarin	-	metab_4285	B(ii)	0	68	Coumarins and derivatives	香豆素类及其衍生物	Coumarins and derivatives	香豆素类及其衍生物	C18	Secondary metabolite	-	-	HMDB0039031	M+ACN+Na	C16H18O6	6.5511666666699995	-	-	pos	-	-	-	-	Phenylpropanoids and polyketides	Coumarins and derivatives	370.128	0.008577728157959999	50.9	7.63986015868113	-	Pyranocoumarins	4.365336930480002	4.33868	4.3532	3.41836	3.41604	3.45618	1.82259	1.8264	1.81992
pos_4409	Elaeokanine C	-	metab_4292	B(i)	87.4	0	Others	其他类	Others	其他类	C18	Others	-	-	-	M+H	C12H21NO2	6.598883333330001	-	C10592	pos	-	-	-	-	-	-	212.164	0.00230808861283	56.8	-0.449871	33023-03-9	-	4.29085	4.314	4.3147	4.3113134446900006	4.3301	4.31044	4.40452	4.4472	4.44663
pos_4411	Tubocurarine	筒箭毒碱	metab_4294	B(ii)	0	54.1	Others	其他类	Ethers	醚类	C18	Others	map00950	Isoquinoline alkaloid biosynthesis	HMDB0015330	M+Na	C37H41N2O6+	6.598883333330001	异喹啉生物碱生物合成	C07547	pos	-	-	Metabolism	Biosynthesis of other secondary metabolites	Organic oxygen compounds	Organooxygen compounds	632.285	0.00839077841276	48.1	-1.31219	57-95-4;6989-98-6	Ethers	3.94023	3.99883	4.0068285764599985	3.92742	3.95633	3.97493	3.2330133022600003	3.4495	3.42363
pos_4416	Eremopetasinorol	-	metab_4299	B(ii)	0	65.8	Others	其他类	Alcohols and derivatives	醇类及其衍生物	C18	Others	-	-	HMDB0029668	M+H	C13H20O2	6.622083333330001	-	-	pos	-	-	-	-	Organic oxygen compounds	Organooxygen compounds	209.154	0.00800665574381	52.8	-0.40955	182127-77-1	Alcohols and polyols	3.19933	3.3235049478900005	3.23927	3.3788	3.36329	3.3909760675200005	3.45411	3.53641	3.46283
pos_4420	2-Amino-2-methylbutanoate	-	metab_4303	B(i)	36.8	0	Amino acids and derivatives	氨基酸及其衍生物	Alpha amino acids and derivatives	Alpha氨基酸及其衍生物	C18	Primary metabolite	-	-	-	M+H	C5H11NO2	6.63805	-	C03571	pos	-	-	-	-	-	-	118.086	0.006447260332569999	45.8	1.52560184022568	-	-	2.42599	2.50311	2.53287	2.44722	2.40813	2.48467	2.46374	2.45212	2.46088
pos_4422	4-t-Butylbenzoic acid	-	metab_4305	B(i)	66.9	0	Others	其他类	Others	其他类	C18	Others	-	-	-	M+H	C11H14O2	6.63805	-	C14535	pos	-	-	-	-	-	-	179.107	0.005795409737229999	52	-0.257675	98-73-7	-	3.70588	3.71398	3.70126	3.84739	3.815899345880001	3.82348	3.75493	3.79766	3.80741
pos_4423	Yucalexin B9	-	metab_4306	B(ii)	0	48.5	Terpenoids	萜类	Diterpenoids	二萜	C18	Secondary metabolite	-	-	HMDB0034691	M+NH4	C20H28O3	6.63805	-	-	pos	-	-	-	-	Lipids and lipid-like molecules	Prenol lipids	334.23743753599996	0.0017041426259900001	48.9	-0.736077	35470-61-2	Diterpenoids	3.9441	3.96787	3.98708	3.67758	3.65593	3.5991058016900004	3.31714	3.39527	3.34786
pos_4437	(3S,4S,6R,7S)-1,10-Bisaboladiene-3,4-diol	（3S，4S，6R，7S）-1,10-二棕榈二烯-3,4-二醇	metab_4320	B(ii)	0	45.6	Terpenoids	萜类	Sesquiterpenoids	倍半萜	C18	Secondary metabolite	-	-	HMDB0031383	M+H	C15H26O2	6.68085	-	-	pos	-	-	-	-	Lipids and lipid-like molecules	Prenol lipids	239.20035131400002	0.0037638841328899997	48.5	-0.861447	129673-87-6	Sesquiterpenoids	3.21874	3.20502	3.25659	3.29748	3.25456	3.3232967810400003	3.3525953735400003	3.3548199113700004	3.37075
pos_4453	Gibbilimbol A	-	metab_4336	B(i)	55.3	0	Others	其他类	Others	其他类	C18	Others	-	-	-	M+H	C16H24O	6.72377	-	-	pos	-	-	-	-	-	-	233.18987010200001	0.00690454245477	50.6	-0.52424	-	-	2.91631	2.9044	2.96016	3.00973	2.9931522687800003	3.03213	3.01876	3.06073	3.15924
pos_4458	(E)-5,8-Megastigmadien-4-one	（E） -5,8-巨豆二烯-4-酮	metab_4341	B(ii)	0	69.2	Others	其他类	Others	其他类	C18	Others	-	-	HMDB0034671	M+H-H2O	C13H20O	6.734483333330001	-	-	pos	-	-	-	-	Organic oxygen compounds	Organooxygen compounds	175.148	0.006293873663539999	53.3	-0.0781478	67401-26-7	Carbonyl compounds	2.87862	2.81202	2.86816	3.14837	3.12539	3.18207	3.89528	3.9574	3.98278
pos_4459	Trehalose	海藻糖	metab_4342	B(i)	66.1	0	Carbohydrates and derivatives	碳水化合物及其衍生物	O-glycosyl compounds	O-糖基化合物	C18	Primary metabolite	map01100;map00500;map01110;map02010	Metabolic pathways;Starch and sucrose metabolism;Biosynthesis of secondary metabolites;ABC transporters	HMDB0000975;PW_C000776	M+H-H2O	C12H22O11	6.734483333330001	代谢途径;淀粉和蔗糖代谢;次级代谢产物的生物合成;ABC转运器	C01083	pos	Carbohydrates	Oligosaccharides	Metabolism;Metabolism;Metabolism;Environmental Information Processing	Global and overview maps;Carbohydrate metabolism;Global and overview maps;Membrane transport	Organic oxygen compounds	Organooxygen compounds	325.11276828900003	0.00357388671573	52.3	-0.45301	99-20-7	Carbohydrates and carbohydrate conjugates	2.86106	2.86639	2.80158	3.5327185556400003	3.5106408795599995	3.49638	2.8423	2.75617	2.83233
pos_4462	3-Nonyl-1H-pyrazole	3 -壬基- 1H -吡唑	metab_4344	B(ii)	0	48.4	Others	其他类	Azoles	唑类	C18	Others	-	-	HMDB0034210	M+H	C12H22N2	6.76665	-	-	pos	-	-	-	-	Organoheterocyclic compounds	Azoles	195.186	0.00397912235043	48.8	-0.00836371	72738-01-3	Pyrazoles	3.4391880353400004	3.40785	3.45876	3.63153	3.60257	3.61859	3.81272	3.80426	3.81016
pos_4463	Nerolidol	橙花叔醇	metab_4345	B(i)	46.4	0	Terpenoids	萜类	Sesquiterpenoids	倍半萜	C18	Secondary metabolite	map01100;map00909	Metabolic pathways;Sesquiterpenoid and triterpenoid biosynthesis	HMDB0041629;HMDB0035662;LMPR0103010005	M+H	C15H26O	6.76665	代谢途径;倍半萜和三萜生物合成	C09704	pos	-	-	Metabolism;Metabolism	Global and overview maps;Metabolism of terpenoids and polyketides	Lipids and lipid-like molecules	Prenol lipids	223.206	0.00431120719093	48.7	-0.525045	7212-44-4;1119-38-6	Sesquiterpenoids	3.03518	2.9370521598500003	2.99251	3.01201	2.88546	2.99899	3.11077	3.11319	3.12614
pos_4464	Cryptomeridiol	柳杉二醇	metab_4346	B(i)	74.5	0	Terpenoids	萜类	Sesquiterpenoids	倍半萜	C18	Secondary metabolite	-	-	-	M+H	C15H28O2	6.76665	-	C17676	pos	-	-	-	-	-	-	241.216	0.00718095661314	54.3	-0.800784	4666-84-6	-	3.49231	3.42656	3.46087	3.50115	3.4243963815400003	3.50269	3.52689	3.5780531753500004	3.56509
pos_4465	Ile-Pro-Arg	-	metab_4347	B(i)	35.1	0	Others	其他类	Others	其他类	C18	Others	-	-	-	M+H	C17H32N6O4	6.76665	-	-	pos	-	-	-	-	-	-	385.258	0.0108671129782	44.8	6.56175304335485	-	-	2.1604287340400004	1.87365	1.48071	2.56722	2.02031	2.24	1.56618	1.5699369018399998	1.56354
pos_4470	Trp-Thr-Tyr	-	metab_4352	B(i)	59.3	0	Amino acids and derivatives	氨基酸及其衍生物	Oligopeptides	寡肽	C18	Primary metabolite	-	-	-	M+H	C24H28N4O6	6.7846	-	-	pos	-	-	-	-	-	-	469.20439055099996	0.0045995710016199995	48.6	-8.0532	-	-	1.82483	1.82924	1.83855	1.93446	2.3828	1.92701	1.9255	1.92932	2.16305
pos_4471	Carbetapentane	咳必清	metab_4353	B(i)	87	0	Others	其他类	Others	其他类	C18	Others	-	-	HMDB0249630;HMDB0258088	M+H	C20H31NO3	6.804066666669999	-	-	pos	-	-	-	-	Benzenoids	Benzene and substituted derivatives	334.237	0.004295057022270001	56.4	-0.658268	-	Not Available	4.09418	4.09987	4.07505	3.89345	3.89016	3.8875	3.5569911492000004	3.50381	3.53966
pos_4477	4-Ethyl-2-methylphenol	4 -乙基-邻甲酚	metab_4359	B(ii)	0	49.6	Others	其他类	Others	其他类	C18	Others	-	-	HMDB0038984	M+H-H2O	C9H12O	6.820066666669999	-	-	pos	-	-	-	-	Benzenoids	Phenols	119.08568388799999	0.0038940070985100006	49	1.1546382973601699	2219-73-0	Cresols	3.3998	3.39172	3.37815	3.49027	3.45979	3.47783	3.5805	3.60936	3.5958
pos_4479	Ethyl gallate	没食子酸乙酯	metab_4361	B(i)	38.6	0	Phenolic acids and derivatives	酚酸类及其衍生物	Benzoic acids and derivatives	苯甲酸及其衍生物	C18	Secondary metabolite	-	-	HMDB0033836	M+H-2H2O	C9H10O5	6.820066666669999	-	-	pos	-	-	-	-	Benzenoids	Benzene and substituted derivatives	163.039	0.0024621766208999998	47.2	-0.327525	831-61-8	Benzoic acids and derivatives	4.889247150169999	4.8977	4.85714	4.91183	4.8994	4.89139	4.93066	4.94573	4.94516
pos_4482	Hypacrone	-	metab_4364	B(i)	71.8	0	Others	其他类	Ketones and derivatives	酮类及其衍生物	C18	Others	-	-	-	M+H	C15H20O2	6.820066666669999	-	-	pos	-	-	-	-	-	-	233.153	0.00247703691755	53.8	-0.547809	-	-	3.07729	2.88433	2.91672	2.99279	2.93353	2.99778	3.1360041144700004	3.15951	3.2211974635500003
pos_4483	Alpha-Bisabolol oxide C	-	metab_4365	B(ii)	0	69.1	Others	其他类	Others	其他类	C18	Others	-	-	HMDB0038138	M+H	C15H26O2	6.820066666669999	-	-	pos	-	-	-	-	Organoheterocyclic compounds	Oxanes	239.2	0.00398773448212	53.1	-0.965433	59861-08-4	Not Available	3.433	3.46781	3.41411	3.4716121627800005	3.4665176947000003	3.48947	3.61213	3.61937	3.63009
pos_4501	3-Hydroxyoctanoic acid	3 -羟基辛酸	metab_4383	B(i)	38.9	0	Organic acids and derivatives	有机酸及其衍生物	Organic acids and derivatives	有机酸及其衍生物	C18	Secondary metabolite	-	-	HMDB0001954	M+H-2H2O	C8H16O3	6.84845	-	C20793	pos	-	-	-	-	Organic acids and derivatives	Hydroxy acids and derivatives	125.096	0.00413763667168	46.7	0.686370648523856	14292-27-4;33796-86-0	Medium-chain hydroxy acids and derivatives	3.5311990766300005	3.51704	3.52333	3.61104	3.59014	3.57623	3.65796	3.709746549080001	3.64886
pos_4503	Dihydrodioscorine	二氢薯蓣碱	metab_4385	B(ii)	0	54.7	Others	其他类	Others	其他类	C18	Others	-	-	HMDB0029828	M+H	C13H21NO2	6.84845	-	-	pos	-	-	-	-	Organoheterocyclic compounds	Azaspirodecane derivatives	224.164	0.0027353166131999997	50.3	-0.780865	96552-66-8	Not Available	3.88676	3.85808	3.84509	4.08073	4.10075	4.0746335705800005	3.03001	2.93243	2.94683
pos_4504	Valeroidine	-	metab_4386	B(i)	59.5	0	Alkaloids and derivatives	生物碱及其衍生物	Tropane alkaloids	莨菪烷类生物碱	C18	Secondary metabolite	-	-	-	M+H	C13H23NO3	6.84845	-	C10869	pos	-	-	-	-	-	-	242.17486235200002	0.00419229354317	51.2	-0.861147	490-96-0	-	3.64741	3.65476	3.58896	3.868371292830001	3.87075	3.83873	2.80223	2.64986	2.63017
pos_4507	Juglone	胡桃醌	metab_4389	B(i)	61.4	0	Quinones	醌类	Naphthoquinones	萘醌	C18	Secondary metabolite	-	-	HMDB0030773	M+CH3OH+H	C10H6O3	6.8644	-	C03840	pos	-	-	-	-	Benzenoids	Naphthalenes	207.065	0.00341632122268	52	-0.480277	481-39-0	Naphthoquinones	3.32399	3.35619	3.30906	4.18182	4.18792	4.152175714049998	3.94323	3.939067970950001	3.9319
pos_4511	Emodin	大黄素	metab_4393	B(i)	94	0	Quinones	醌类	Anthraquinones	蒽醌	C18	Secondary metabolite	-	-	HMDB0035214;LMPK13040008	M+H	C15H10O5	6.887516666669999	-	C10343	pos	-	-	-	-	Benzenoids	Anthracenes	271.06	0.00245241438531	58.2	-0.696808	518-82-1	Anthraquinones	6.41228	6.4228811613199985	6.39801	5.68815	5.68678	5.66043	5.17386	5.17324	5.1714570471300005
pos_4530	(-)-(Z)-Tetrahydro-6-(2-pentenyl)-2H-pyran-2-one	（-）-（Z）-四氢-6-（2-戊烯基）-2H-吡喃-2-酮	metab_4412	B(ii)	0	42	Others	其他类	Lactones	内酯类	C18	Others	-	-	HMDB0033700	M+CH3OH+H	C10H16O2	6.958683333330001	-	-	pos	-	-	-	-	Organoheterocyclic compounds	Lactones	201.148	0.0030484725349899998	48.1	-0.192324	25524-95-2	Delta valerolactones	2.5171127221000003	2.65677	2.69055	2.73396	2.69856	2.72941	2.79571	2.7111949561400004	2.79093
pos_4538	2-Phenylethyl O-beta-D-xylopyranosyl-(1->2)-beta-D-glucopyranoside	-	metab_4420	B(i)	57.6	0	Carbohydrates and derivatives	碳水化合物及其衍生物	O-glycosyl compounds	O-糖基化合物	C18	Primary metabolite	-	-	-	M+H	C19H28O10	6.971216666669999	-	-	pos	-	-	-	-	-	-	417.175	0.0026227142098200003	51.2	-0.123482	-	-	4.27079	4.27526	4.2847	4.37981	4.3678610110100005	4.37434	4.37281	4.37667	4.3701
pos_4551	Phenylglucuronide	苯葡萄糖醛酸苷	metab_4432	B(ii)	0	63.4	Carbohydrates and derivatives	碳水化合物及其衍生物	Glycosides	糖苷类	C18	Primary metabolite	-	-	HMDB0059806	M+CH3OH+Na	C12H14O7	7.00303	-	-	pos	-	-	-	-	Organic oxygen compounds	Organooxygen compounds	325.09164557099996	0.0031234222082	50.2	8.48947281860192	-	Carbohydrates and carbohydrate conjugates	3.74563	3.70191	3.72535	4.34505	4.32788	4.32407	4.12337	4.0958077290900015	4.10741
pos_4554	3-Caffeoyl-4-feruloylquinic acid	3-咖啡酰基-4-阿魏酰奎宁酸	metab_4435	B(ii)	0	52.1	Phenolic acids and derivatives	酚酸类及其衍生物	Quinic acids and derivatives	奎宁酸及其衍生物	C18	Secondary metabolite	-	-	HMDB0037092	M+H	C26H26O12	7.00303	-	-	pos	-	-	-	-	Organic oxygen compounds	Organooxygen compounds	531.15	0.0024303731786999997	49.9	0.3987622124825	125132-81-2	Alcohols and polyols	4.3193568430900005	4.34764	4.33365	4.91002	4.91789	4.90123	4.72487	4.73916	4.73227
pos_4559	N-decanoylglycine	-	metab_4440	B(i)	37	0	Amino acids and derivatives	氨基酸及其衍生物	Alpha amino acids and derivatives	Alpha氨基酸及其衍生物	C18	Primary metabolite	-	-	HMDB0013267	M+H-H2O	C12H23NO3	7.017333333330001	-	-	pos	-	-	-	-	Organic acids and derivatives	Carboxylic acids and derivatives	212.16445311599998	0.00561902699608	46.2	-0.227932	-	Amino acids, peptides, and analogues	4.30065	4.31173	4.26898	4.31106	4.28821	4.28096	4.3576300985100005	4.3607239811900005	4.38971
pos_4565	Epioxylubimin	表木素	metab_4446	B(ii)	0	57.9	Terpenoids	萜类	Sesquiterpenoids	倍半萜	C18	Secondary metabolite	-	-	HMDB0035613	M+H	C15H24O3	7.043966666669999	-	-	pos	-	-	-	-	Lipids and lipid-like molecules	Prenol lipids	253.17964773900002	0.0025815397616	50.4	-0.687312	69350-60-3	Sesquiterpenoids	3.60786	3.6003312823800004	3.58557	3.7175	3.68555	3.70482	3.81711	3.80284	3.79858
pos_4568	Met-Tyr	-	metab_4449	B(i)	39	0	Others	其他类	Others	其他类	C18	Others	-	-	HMDB0028985	M+H	C14H20N2O4S	7.054666666669999	-	-	pos	-	-	-	-	Organic acids and derivatives	Carboxylic acids and derivatives	313.121	0.00243951077594	46.3	-0.855056	-	Amino acids, peptides, and analogues	3.55352	3.5325261181800003	3.56256	3.0951644340900004	3.1503	3.19066	3.7125	3.73682	3.70534
pos_4585	Orientaloside	东方苷	metab_4465	B(ii)	0	52.7	Carbohydrates and derivatives	碳水化合物及其衍生物	Glycosides	糖苷类	C18	Primary metabolite	-	-	HMDB0037100	M+ACN+Na	C25H32O13	7.140066666669999	-	-	pos	-	-	-	-	Organic oxygen compounds	Organooxygen compounds	604.2026960219999	0.00409928649121	48.6	4.878263687255219	-	Carbohydrates and carbohydrate conjugates	3.24817	3.15318	3.11441	3.9679	3.92267	3.90809	4.23003	4.21289	4.22859
pos_4603	Trans-zeatin riboside	-	metab_4483	B(ii)	0	71.8	Nucleotides and derivatives	核苷酸及其衍生物	Nucleotides and derivatives	核苷酸及其衍生物	C18	Primary metabolite	map01110;map00908	Biosynthesis of secondary metabolites;Zeatin biosynthesis	HMDB0304506	M+ACN+H	C15H21N5O5	7.18995	次级代谢产物的生物合成;玉米素生物合成	C16431	pos	-	-	Metabolism;Metabolism	Global and overview maps;Metabolism of terpenoids and polyketides	Nucleosides, nucleotides, and analogues	Purine nucleosides	393.19047733800005	0.00273304058731	51.7	6.78622725096194	-	Not Available	0.7435633125229999	1.6045210062600002	0.7550013711779999	0.8348298883759999	0.824651	0.830168	0.8288629938959999	0.832156	0.826553
pos_4612	Methyl (3b,11x)-3-Hydroxy-8-oxo-6-eremophilen-12-oate	（3b，11x）-3-羟基-8-氧代-6-嗜热菌烯-12-甲酸甲酯	metab_4492	B(ii)	0	66.3	Terpenoids	萜类	Sesquiterpenoids	倍半萜	C18	Secondary metabolite	-	-	HMDB0041229	M+CH3OH+H	C16H24O4	7.23255	-	-	pos	-	-	-	-	Lipids and lipid-like molecules	Prenol lipids	313.201	0.00253729441897	52.5	-0.729374	64964-00-7	Sesquiterpenoids	3.02313	2.98343	3.0507934104100003	3.61266	3.65041	3.58211	4.03811	4.02818	4.05067
pos_4614	Panaxjapyne C	-	metab_4494	B(i)	37.2	0	Lipids	脂质	Fatty Acyls	脂肪酰类	C18	Primary metabolite	-	-	-	M+H	C17H26O3	7.243233333330001	-	-	pos	-	-	-	-	-	-	279.193	0.00813744027737	44.5	-9.33184	-	-	2.64285	2.63592	2.70294	2.7991591924799994	2.8630496298000003	2.76316	2.9525075537800003	2.95989	2.78193
pos_4632	4-O-Caffeoyl-3-O-feruloylquinic acid	4 - O -咖啡酰基- 3 - O -阿魏酰奎宁酸	metab_4512	B(ii)	0	63.3	Phenolic acids and derivatives	酚酸类及其衍生物	Quinic acids and derivatives	奎宁酸及其衍生物	C18	Secondary metabolite	-	-	HMDB0033008	M+H	C26H26O12	7.3040333333300005	-	-	pos	-	-	-	-	Phenylpropanoids and polyketides	Flavonoids	531.15	0.0027334329997600005	52.2	0.400406687615863	96990-65-7	Flavonoid glycosides	4.53525	4.544393764740001	4.53759	5.187647581419999	5.18964	5.17107	5.019	5.01603	5.01732
pos_4633	3,4-Di-O-caffeoylquinic acid	3,4-O-二咖啡酰基奎宁酸	metab_4513	B(ii)	0	54.6	Phenolic acids and derivatives	酚酸类及其衍生物	Quinic acids and derivatives	奎宁酸及其衍生物	C18	Secondary metabolite	-	-	HMDB0030705	M+CH3OH+H	C25H24O12	7.3040333333300005	-	C10468	pos	-	-	-	-	Organic oxygen compounds	Organooxygen compounds	549.161	0.006343073153810001	50.6	0.5874277070583129	14534-61-3	Alcohols and polyols	3.86484	3.91395	3.88346	4.55954	4.60354	4.57033	4.411573646680001	4.42529	4.38066
pos_4641	Alpha-Bisabolol oxide B	-	metab_4521	B(ii)	0	60.9	Others	其他类	Others	其他类	C18	Others	-	-	HMDB0038197	M+H-H2O	C15H26O2	7.3415	-	C16774	pos	-	-	-	-	Organoheterocyclic compounds	Tetrahydrofurans	221.19	0.00276514605221	51.5	-0.475986	26184-88-3	Not Available	3.84326	3.83502	3.83188	4.113622992830002	4.11947	4.09376	4.23592	4.24378	4.2068779559500005
pos_4667	Isoeugenitin	异甲基丁香色原酮	metab_4546	B(ii)	0	47.8	Others	其他类	Benzopyrans	苯骈吡喃类	C18	Others	-	-	HMDB0029473	M+H	C12H12O4	7.4197	-	-	pos	-	-	-	-	Organoheterocyclic compounds	Benzopyrans	221.081	0.0029866550311699997	48.8	-1.40917	519-18-6	1-benzopyrans	3.8494	3.83031	3.83533	4.06756	4.0544352129300005	4.0602231810100005	3.84166	3.78599	3.77469
pos_4669	9alpha-(3-Methylbutanoyloxy)-4S-hydroxy-10(14)-oplopen-3-one	9α-（3-甲基丁酰氧基）-4S-羟基-10（14）-oplopen-3-酮	metab_4548	B(ii)	0	40.5	Terpenoids	萜类	Sesquiterpenoids	倍半萜	C18	Secondary metabolite	-	-	HMDB0039171	M+CH3OH+H	C20H32O4	7.4197	-	-	pos	-	-	-	-	Lipids and lipid-like molecules	Prenol lipids	369.26332905199996	0.00674835315333	47.2	-0.659169	348113-04-2	Sesquiterpenoids	3.99936	4.014902794469998	4.00331	3.76616	3.81429	3.7373	3.62938	3.64642	3.66706
pos_4680	Torachrysone 8-(2-apiosylglucoside)	Torachrysone 8-（2-芹糖基葡萄糖苷）	metab_4559	B(ii)	0	62.3	Carbohydrates and derivatives	碳水化合物及其衍生物	Glycosides	糖苷类	C18	Primary metabolite	-	-	HMDB0034612	M+ACN+Na	C25H32O13	7.464066666669999	-	-	pos	-	-	-	-	Organic oxygen compounds	Organooxygen compounds	604.203	0.00286240757492	50.6	4.926403059306519	245724-11-2	Carbohydrates and carbohydrate conjugates	2.50393	2.48059	2.17581	3.38835	3.45963	3.31531	3.4241673616000003	3.3329142920700003	3.44046
pos_4696	Auberganol	-	metab_4575	B(ii)	0	76.9	Terpenoids	萜类	Sesquiterpenoids	倍半萜	C18	Secondary metabolite	-	-	HMDB0039715	M+H	C15H28O2	7.5334	-	-	pos	-	-	-	-	Lipids and lipid-like molecules	Prenol lipids	241.216	0.00517026311784	54.7	-0.854749	102490-02-8	Sesquiterpenoids	3.08046	3.03872	3.05254	3.2207474084400003	3.10274	3.21617	3.2301	3.2223629712299995	3.20119
pos_4701	(S)-Edulinine	-	metab_4580	B(ii)	0	62.4	Others	其他类	Quinolines and derivatives	喹啉及其衍生物	C18	Others	-	-	HMDB0030178	M+H	C16H21NO4	7.54758	-	-	pos	-	-	-	-	Organoheterocyclic compounds	Quinolines and derivatives	292.15412579599996	0.00300314011627	51.7	-0.717137	27495-36-9	Quinolones and derivatives	1.71074	1.719	2.02925	2.83245	2.8774513516400004	2.97652	1.811	1.8148	2.37449
pos_4713	2-Hydroxyacorenone	2 -羟基丙酮	metab_4592	B(ii)	0	47.9	Others	其他类	Others	其他类	C18	Others	-	-	HMDB0030916	M+H-2H2O	C15H24O2	7.59365	-	-	pos	-	-	-	-	Organic oxygen compounds	Organooxygen compounds	201.16374509599999	0.0030673332740399997	48.4	-0.135376	185154-94-3	Carbonyl compounds	3.33527	3.31137	3.27325	3.82521	3.83577	3.82972	3.81922	3.83346	3.81344
pos_4732	Yuzu lactone	Yuzu内酯	metab_4611	B(ii)	0	42.2	Others	其他类	Macrolides and derivatives	大环内酯类及其衍生物	C18	Others	-	-	HMDB0032901	M+H-2H2O	C12H20O2	7.67705	-	-	pos	-	-	-	-	Phenylpropanoids and polyketides	Macrolides and analogues	161.132	0.00286604072585	45.4	-0.336359	79894-05-6	Not Available	3.68209	3.7152	3.73439	3.862613691640001	3.84728	3.83633	3.90117	3.86475	3.90497
pos_4734	MG(5-iso PGF2VI/0:0/0:0)	-	metab_4613	B(ii)	0	47.6	Others	其他类	Others	其他类	C18	Others	-	-	HMDB0260485	M+H-H2O	C21H36O7	7.67705	-	-	pos	-	-	-	-	Not Available	Not Available	383.243	0.0051912231894700005	48.6	-0.439072	-	Not Available	3.08362	3.2239290615400003	3.23353	3.27091	3.28608	3.28356	2.86867	3.00432	2.96784
pos_4739	Hynapene A	-	metab_4618	B(i)	70.1	0	Lipids	脂质	Fatty Acyls	脂肪酰类	C18	Primary metabolite	-	-	-	M+H	C18H28O5	7.70542	-	-	pos	-	-	-	-	-	-	325.201	0.00228911718104	53.4	-0.607096	-	-	4.3624	4.3863762788599985	4.38626	4.542	4.52637	4.52019	4.32601	4.317	4.31226
pos_4749	3-hydroxypyruvic acid	3 -羟基丙酮酸	metab_4628	B(i)	54.2	0	Organic acids and derivatives	有机酸及其衍生物	Organic acids and derivatives	有机酸及其衍生物	C18	Secondary metabolite	map01100;map00630;map01110;map00260;map01200	Metabolic pathways;Glyoxylate and dicarboxylate metabolism;Biosynthesis of secondary metabolites;Glycine, serine and threonine metabolism;Carbon metabolism	HMDB0001352	M+H	C3H4O4	7.76765	代谢途径;乙醛酸和二羧酸代谢;次级代谢产物的生物合成;甘氨酸、丝氨酸和苏氨酸代谢;碳代谢	C00168	pos	-	-	Metabolism;Metabolism;Metabolism;Metabolism;Metabolism	Global and overview maps;Carbohydrate metabolism;Global and overview maps;Amino acid metabolism;Global and overview maps	Organic acids and derivatives	Hydroxy acids and derivatives	105.01853749700001	0.0018728428694700001	50	2.9079515936261897	1113-60-6	Beta hydroxy acids and derivatives	2.93438	2.93946	2.9781434191900003	3.54264	3.56294	3.50692	3.18997	3.2084113373900003	3.21379
pos_4750	(R)-Piperitone	（R） -胡椒酮	metab_4629	B(ii)	0	51.6	Terpenoids	萜类	Monoterpenoids	单萜	C18	Secondary metabolite	-	-	HMDB0035737	M+H-H2O	C10H16O	7.76765	-	C09885	pos	-	-	-	-	Lipids and lipid-like molecules	Prenol lipids	135.117	0.0012132593952	49.8	0.378509243690705	4573-50-6	Monoterpenoids	3.7851819984400006	3.79794	3.82775	4.19202	4.18848	4.15857	4.13655	4.1603	4.16033
pos_4751	(+)-alpha-pinene	（+）-α-蒎烯	metab_4630	B(i)	63.5	0	Terpenoids	萜类	Monoterpenoids	单萜	C18	Secondary metabolite	-	-	HMDB0006525;LMPR0102120012	M+NH4	C10H16	7.76765	-	C06306	pos	-	-	-	-	Lipids and lipid-like molecules	Prenol lipids	154.159	0.0013152749030499998	52.4	-0.617114	7785-70-8	Monoterpenoids	3.31114	3.34302	3.37322	3.91945	3.9253334453699993	3.864667480290001	3.4398	3.48153	3.4723155234199994
pos_4762	Eremophila-1(10),8,11-triene	-	metab_4641	B(i)	84.4	0	Terpenoids	萜类	Sesquiterpenoids	倍半萜	C18	Secondary metabolite	-	-	-	M+H	C15H22	7.7853333333300005	-	-	pos	-	-	-	-	-	-	203.17940322799998	0.0012180941925500001	56.1	-0.118263	-	-	4.266	4.27753	4.31243	4.60651	4.600081868909999	4.547145753040001	5.056188241559999	5.09658	5.08972
pos_4763	6-Hydroxypentadecanedioic acid	6 -羟基十五烷二酸	metab_4642	B(ii)	0	72.7	Lipids	脂质	Fatty Acyls	脂肪酰类	C18	Primary metabolite	-	-	HMDB0031885	M+ACN+Na	C15H28O5	7.7853333333300005	-	-	pos	-	-	-	-	Lipids and lipid-like molecules	Fatty Acyls	352.21216103300003	0.0019946483522	51.9	9.42858193077506	38076-52-7	Fatty acids and conjugates	4.637082918969999	4.6479	4.68545	4.80605	4.82427	4.73888	4.15899	4.17523	4.1607294877199985
pos_4764	Pharacine	-	metab_4643	B(i)	59.3	0	Phenolic acids and derivatives	酚酸类及其衍生物	Benzoic acids and derivatives	苯甲酸及其衍生物	C18	Secondary metabolite	-	-	-	M+H	C24H24O8	7.7853333333300005	-	-	pos	-	-	-	-	-	-	441.152	0.00466492886487	48.9	-4.65018	-	-	2.60461	2.36045	2.77802	3.294660914690001	3.1109672572400004	3.1712965050200004	2.13522	2.46347	2.78033
pos_4776	Dihydrocarveyl acetate	-	metab_4655	B(i)	65.4	0	Terpenoids	萜类	Monoterpenoids	单萜	C18	Secondary metabolite	-	-	HMDB0041469	M+NH4	C12H20O2	7.85062	-	-	pos	-	-	-	-	Lipids and lipid-like molecules	Prenol lipids	214.18	0.00130146694735	52.7	-0.653511	20777-49-5	Monoterpenoids	4.415978111559999	4.37646	4.42423	4.35852	4.36662	4.32964	4.45104	4.48232	4.4519044698400005
pos_4781	Trichotriol	-	metab_4660	B(i)	86.7	0	Others	其他类	Alcohols and derivatives	醇类及其衍生物	C18	Others	-	-	-	M+H	C15H24O4	7.921816666669999	-	-	pos	-	-	-	-	-	-	269.17457545599996	0.00146256433741	56.7	-0.597475	-	-	5.91081	5.909708773689999	5.91765	6.0298847677100005	6.03952	6.022966541690002	5.96325	5.9683	5.963586415090001
pos_4797	Alpha-Santalene-12-oic acid	-	metab_4676	B(i)	57.1	0	Terpenoids	萜类	Sesquiterpenoids	倍半萜	C18	Secondary metabolite	-	-	-	M+H	C15H22O2	8.00023	-	-	pos	-	-	-	-	-	-	235.169	0.0027028257926999997	50.9	-0.712677	-	-	3.67813	3.71932	3.69601	3.68374	3.69494	3.71003	3.83724	3.8085	3.81848
pos_4804	7alpha,24-dihydroxycholest-4-en-3-one	7α，24 -二羟基胆甾- 4 -烯- 3 -酮	metab_4683	B(ii)	0	47.7	Steroids and steroid derivatives	甾体及其衍生物	Other steroids and steroid derivatives	其他类甾体及其衍生物	C18	Secondary metabolite	-	-	HMDB0062401	M+Na-H2O	C27H44O3	8.0752	-	C17331	pos	-	-	-	-	Lipids and lipid-like molecules	Steroids and steroid derivatives	421.30596355800003	0.0033246713896900003	47	-5.48055	-	Bile acids, alcohols and derivatives	0.205587	1.98302	2.27796	2.95666	3.03586	3.0153312722400005	2.76382	2.4121	2.9260712044300003
pos_4808	Galbonolide C	-	metab_4687	B(i)	47.9	0	Others	其他类	Macrolides and derivatives	大环内酯类及其衍生物	C18	Others	-	-	-	M+H	C21H32O5	8.11427	-	-	pos	-	-	-	-	-	-	365.23210719699995	0.0030615675811	48.7	-0.393602	-	-	4.25703	4.22799	4.26079	4.46062	4.47924	4.43896	4.26063	4.27299	4.289242239019998
pos_4812	Crepidiaside B	假还阳参苷B	metab_4691	B(ii)	0	43.2	Carbohydrates and derivatives	碳水化合物及其衍生物	O-glycosyl compounds	O-糖基化合物	C18	Primary metabolite	-	-	HMDB0302022	M+H	C21H28O9	8.12325	-	-	pos	-	-	-	-	Organic oxygen compounds	Organooxygen compounds	425.178	0.00248502059217	46.4	-6.16927	-	Carbohydrates and carbohydrate conjugates	3.3818	3.28974	3.30585	4.12757	4.17202	4.12889	4.37209	4.36903	4.37295
pos_4820	(+)-Theonellin	-	metab_4699	B(i)	86.2	0	Terpenoids	萜类	Sesquiterpenoids	倍半萜	C18	Secondary metabolite	-	-	-	M+H	C15H24	8.16792	-	-	pos	-	-	-	-	-	-	205.195	0.00206800686843	56.8	-0.389662	-	-	3.31187	3.29448	3.33351	3.38941	3.4087498663700004	3.41394	3.5609519153800004	3.57852	3.60881
pos_4824	Beta-Santalol	-	metab_4703	B(ii)	0	59.5	Terpenoids	萜类	Sesquiterpenoids	倍半萜	C18	Secondary metabolite	-	-	HMDB0036716	M+H	C15H24O	8.1945	-	C09720	pos	-	-	-	-	Lipids and lipid-like molecules	Prenol lipids	221.18984290900002	0.00251951494754	51.3	-0.676312	77-42-9	Sesquiterpenoids	3.87408	3.88312	3.91911	4.2188255234300005	4.22745	4.22723	4.54128	4.55381	4.55808
pos_4830	Tenuifolene	-	metab_4709	B(i)	94.7	0	Others	其他类	Hydrocarbons and derivatives	烃类及其衍生物	C18	Others	-	-	-	M+H	C15H22	8.24982	-	-	pos	-	-	-	-	-	-	203.17938534799998	0.00161520942676	58	-0.206704	-	-	3.9076	3.87436	3.91511	4.34784	4.36412	4.3392	4.82312	4.84284	4.85141
pos_4848	Linalyl acetate	-	metab_4727	B(ii)	0	41.9	Terpenoids	萜类	Monoterpenoids	单萜	C18	Secondary metabolite	-	-	HMDB0039522	M+H-2H2O	C12H20O2	8.34025	-	C09863	pos	-	-	-	-	Lipids and lipid-like molecules	Prenol lipids	161.132	0.005449134671819999	46	-0.405132	115-95-7	Monoterpenoids	3.88048	3.92557	3.94026	4.08087	4.07582	4.04274	4.01998	4.05912	4.05867
pos_4866	4-Oxoretinol	4-酮维生素A	metab_4745	B(ii)	0	56.2	Vitamins	维生素类	Vitamins	维生素类	C18	Primary metabolite	-	-	HMDB0012329	M+ACN+H	C20H28O2	8.40942	-	C16683	pos	-	-	-	-	Lipids and lipid-like molecules	Prenol lipids	342.243	0.00320773100579	50.4	-0.753573	62702-55-0	Retinoids	4.30517	4.28792	4.3119	3.38281	3.51134	3.44098	3.5742117387300003	3.47835	3.5583384822500004
pos_4876	10alpha-4,5-Seco-11-eudesmene-4,5-dione	10alpha-4,5-Seco-11-桉烯-4,5-二酮	metab_4755	B(ii)	0	50	Terpenoids	萜类	Monoterpenoids	单萜	C18	Secondary metabolite	-	-	HMDB0032681	M+H	C15H24O2	8.46592	-	-	pos	-	-	-	-	Lipids and lipid-like molecules	Prenol lipids	237.185	0.00382137107892	48.8	-0.818508	210106-14-2	Monoterpenoids	3.40089	3.4536	3.49149	3.63647	3.65539	3.67062	3.77425	3.778416522240001	3.71948
pos_4877	(3beta,9beta)-7-Drimene-3,11,12-triol	（3beta，9beta）-7-二烯-3,11,12-三醇	metab_4756	B(ii)	0	42.3	Others	其他类	Alcohols and derivatives	醇类及其衍生物	C18	Others	-	-	HMDB0036053	M+CH3OH+Na	C15H26O3	8.46592	-	-	pos	-	-	-	-	Organic oxygen compounds	Organooxygen compounds	309.206	0.00189145779648	45.9	8.48843902496955	101470-79-5	Alcohols and polyols	3.84157	3.884148621090001	3.90973	3.808487789700001	3.79356	3.81435	3.96389	3.98023	3.97253
pos_4878	Isomorellic acid	异藤黄酸	metab_4757	B(ii)	0	46.6	Others	其他类	Benzopyrans	苯骈吡喃类	C18	Others	-	-	HMDB0030734	M+H-2H2O	C33H36O8	8.46592	-	-	pos	-	-	-	-	Lipids and lipid-like molecules	Fatty Acyls	525.2306647969999	0.0020001821166	45.5	6.2466437239524195	-	Fatty acid esters	3.5800159161800003	3.53518	3.47017	3.90521	3.90052	3.96784	3.8414	3.81912	3.79009
pos_4887	3-hydroxy-p-cymene	3-羟基对异丙基甲苯	metab_4766	B(i)	81.7	0	Terpenoids	萜类	Monoterpenoids	单萜	C18	Secondary metabolite	-	-	HMDB0001878	M+H	C10H14O	8.5806	-	C09908	pos	-	-	-	-	Lipids and lipid-like molecules	Prenol lipids	151.112	0.00326988136767	55.9	-0.21625	89-83-8	Monoterpenoids	4.51041	4.514068583909999	4.53592	4.52145	4.52546	4.54188	4.60349	4.61997	4.57734
pos_4891	Cer(12:2_2O/2:0)	-	metab_4770	B(i)	57.3	0	Others	其他类	Others	其他类	C18	Others	-	-	-	M+H	C14H25NO3	8.5806	-	-	pos	-	-	-	-	-	-	256.191	0.00241030787877	50.8	-0.480711	-	-	2.9409	2.92274	2.99878	3.4677848629500003	3.4976740541500004	3.3971906048400005	2.78979	2.98202	2.95911
pos_4892	9-OxoODE	9-酮基-10(E),12(Z)-十八碳二烯酸	metab_4771	B(i)	96.1	0	Lipids	脂质	Fatty Acyls	脂肪酰类	C18	Primary metabolite	map00591	Linoleic acid metabolism	HMDB0004669;LMFA02000251;LMFA02000274	M+H	C18H30O3	8.5806	亚油酸代谢	C14766	pos	-	-	Metabolism	Lipid metabolism	Lipids and lipid-like molecules	Fatty Acyls	295.22659713400003	0.00132253843719	58.3	-0.5918	-	Lineolic acids and derivatives	5.18206	5.18004	5.20795	5.53056	5.52947	5.50816	5.34201	5.32593	5.32485
pos_4908	(2E)-9-hydroxynon-2-enoic acid	-	metab_4787	B(i)	81.2	0	Organic acids and derivatives	有机酸及其衍生物	Organic acids and derivatives	有机酸及其衍生物	C18	Secondary metabolite	-	-	-	M+H	C9H16O3	8.6793	-	-	pos	-	-	-	-	-	-	173.11722251700002	0.00166864101632	55.8	0.0099527987055886	-	-	4.51305	4.506449440340001	4.53299	4.78791	4.77804	4.76829	4.54964	4.51861	4.5215
pos_4909	Occidol	-	metab_4788	B(i)	80.6	0	Others	其他类	Others	其他类	C18	Others	-	-	-	M+H	C15H22O	8.6793	-	-	pos	-	-	-	-	-	-	219.17420129299998	0.00166772999206	55.7	-0.643835	-	-	3.11018	3.12043	3.19465	3.3237220999799995	3.25028	3.33796	3.54633	3.54369	3.50209
pos_4910	Hanalpinol	-	metab_4789	B(i)	53.5	0	Terpenoids	萜类	Sesquiterpenoids	倍半萜	C18	Secondary metabolite	-	-	-	M+H-H2O	C15H24O3	8.6793	-	-	pos	-	-	-	-	-	-	235.169	0.00138034875821	50.1	-0.68085	-	-	3.58804	3.58234	3.55767	3.68466	3.66519	3.67588	3.830665771530001	3.85371	3.78481
pos_4915	Dinorcapsaicin	（4E）-N-（4-羟基-3-甲氧基苄基）-6-甲基庚-4-烯酰胺	metab_4794	B(ii)	0	67.1	Others	其他类	Others	其他类	C18	Others	-	-	HMDB0036325	M+H	C16H23NO3	8.71285	-	-	pos	-	-	-	-	Benzenoids	Phenols	278.17494810700003	0.00136759476699	52.8	-0.439898	61229-09-2	Methoxyphenols	5.41404	5.35938	5.41944	5.681	5.669307934990001	5.63676	4.967704096319999	4.91746	4.90867
pos_4930	3-Phenylpropyl acetate	3 -乙酸苯丙酯	metab_4809	B(ii)	0	40.9	Others	其他类	Others	其他类	C18	Others	-	-	HMDB0033386	M+ACN+H	C11H14O2	8.8138	-	C17663	pos	-	-	-	-	Benzenoids	Benzene and substituted derivatives	220.13310389900002	0.00410329838733	47.7	-0.568893	122-72-5	Not Available	4.12486	4.053063570380002	4.1460661760400015	3.37782	3.3841794608599995	3.36664	1.46312	1.81123	1.47914
pos_4932	Beta-Cadinene	-	metab_4811	B(i)	52.9	0	Terpenoids	萜类	Sesquiterpenoids	倍半萜	C18	Secondary metabolite	-	-	HMDB0041576;LMPR0103330003	M+H	C15H24	8.854733333330001	-	C09625	pos	-	-	-	-	Lipids and lipid-like molecules	Prenol lipids	205.19499844900002	0.0037651985901799995	50.1	-0.385686	523-47-7	Sesquiterpenoids	3.4258716176200004	3.44452	3.4737416370699994	3.77119	3.74758	3.72308	3.78858	3.78218	3.77268
pos_4935	Capsidiol	椒二醇	metab_4814	B(ii)	0	75.3	Terpenoids	萜类	Sesquiterpenoids	倍半萜	C18	Secondary metabolite	map00909	Sesquiterpenoid and triterpenoid biosynthesis	HMDB0002352	M+CH3OH+Na	C15H24O2	8.86885	倍半萜和三萜生物合成	C09627	pos	-	-	Metabolism	Metabolism of terpenoids and polyketides	Lipids and lipid-like molecules	Prenol lipids	291.19526946599996	0.005503677781529999	52.5	9.48208672532807	37208-05-2	Sesquiterpenoids	4.26001	4.20265	4.26431	4.3564390257999985	4.3199809062800005	4.31366	4.15851	4.10713	4.11793
pos_4937	Bisoprolol	比索洛尔富马酸盐	metab_4816	B(i)	42.7	0	Others	其他类	Others	其他类	C18	Others	-	-	HMDB0014750;PW_C009100	M+CH3OH+H	C18H31NO4	8.86885	-	C06852	pos	-	-	-	-	Benzenoids	Benzene and substituted derivatives	358.25850064900004	0.0044932665913	47.7	-0.919387	66722-44-9	Benzylethers	2.98788	2.96322	3.0207	3.1845629036400003	3.20752	3.0488558561400003	2.97728	2.93285	2.96748
pos_4942	Bovinic acid	(9Z,11E)-13-氧代-9,11-十八碳二烯酸	metab_4821	B(ii)	0	47.7	Lipids	脂质	Fatty Acyls	脂肪酰类	C18	Primary metabolite	map00591	Linoleic acid metabolism	HMDB0003797	M+ACN+Na	C18H32O2	8.924166666669999	亚油酸代谢	C04056	pos	-	-	Metabolism	Lipid metabolism	Lipids and lipid-like molecules	Fatty Acyls	344.25809035300006	0.0037437953549099997	47.1	7.45898646182919	2540-56-9	Lineolic acids and derivatives	4.37238	4.362832985390002	4.41146	3.932503064780001	3.87211	3.90779	1.90393	1.90775	1.90125
pos_4943	(E)-3,7-Dimethyl-2,6-octadienyl ester 4-methyl-pentanoic acid	-	metab_4822	B(i)	65.7	0	Lipids	脂质	Fatty Acyls	脂肪酰类	C18	Primary metabolite	-	-	-	M+H-H2O	C16H28O2	8.934866666669999	-	-	pos	-	-	-	-	-	-	235.20547974599998	0.0037072083140100003	52.4	-0.642884	-	-	4.02106	4.068353870269998	4.05583	3.92269	3.9324179565699993	3.85671	3.93024	3.91386	3.90389
pos_4948	Furodysinin hydroperoxide	-	metab_4827	B(i)	85.8	0	Others	其他类	Others	其他类	C18	Others	-	-	-	M+H	C16H24O4	8.96362	-	-	pos	-	-	-	-	-	-	281.175	0.0033577828340300006	56.6	-0.634406	-	-	5.26386	5.30158	5.29304	5.1663	5.175446518309999	5.1093	5.08886	5.077806732780001	5.076315839059999
pos_4952	(+)-Terrecyclic acid A	-	metab_4831	B(i)	63.6	0	Terpenoids	萜类	Diterpenoids	二萜	C18	Secondary metabolite	-	-	-	M+H	C15H20O3	9.00972	-	-	pos	-	-	-	-	-	-	249.14837323900002	0.00310242483609	52	-0.595198	-	-	3.67154	3.70572	3.71391	3.86665	3.86305	3.84377	3.84896	3.8113	3.82754
pos_4956	Betaenone D	-	metab_4835	B(i)	86.5	0	Others	其他类	Ketones and derivatives	酮类及其衍生物	C18	Others	-	-	-	M+H	C21H36O6	9.03635	-	-	pos	-	-	-	-	-	-	385.258	0.007074432638749999	56.4	-0.824094	-	-	3.50854	3.66155	3.6127450785300006	4.0809707791199985	4.14314	4.0585428183499985	3.61856	3.5409066197400003	3.60959
pos_4961	Octadeca-8,10,12-triynoic acid	-	metab_4840	B(i)	81.4	0	Lipids	脂质	Fatty Acyls	脂肪酰类	C18	Primary metabolite	-	-	LMFA01031106	M+H	C18H24O2	9.04705	-	-	pos	-	-	-	-	-	-	273.185	0.0028613716261500005	55.6	-0.650223	-	-	4.316267680319998	4.34324	4.345794744119999	4.51896	4.52926	4.505074242759999	4.4789	4.46939	4.48305
pos_4968	Litseakolide A	-	metab_4847	B(i)	91.8	0	Others	其他类	Lactones	内酯类	C18	Others	-	-	-	M+H	C18H28O4	9.06125	-	-	pos	-	-	-	-	-	-	309.206	0.00308961021077	57.6	-0.719457	-	-	5.07126	5.07572	5.07898	5.2666	5.272891242669999	5.23465	5.13659	5.12802	5.13315
pos_4976	Mozambioside	-	metab_4855	B(ii)	0	54.3	Others	其他类	Others	其他类	C18	Others	-	-	HMDB0037002	M+H	C26H36O10	9.116333333330001	-	-	pos	-	-	-	-	Organoheterocyclic compounds	Naphthofurans	509.236	0.004906859475050001	48.3	-4.58155	70717-95-2	Not Available	1.98891	1.99334	2.00269	2.09695	2.16505	2.62871	3.18607	3.16969	3.18115
pos_4980	(R)-1-O-[b-D-Apiofuranosyl-(1->2)-b-D-glucopyranoside]-1,3-octanediol	（R） -1-O-[b-D-呋喃磺酰基-（1->2）-b-D-吡喃葡萄糖苷]-1,3-辛二醇	metab_4859	B(ii)	0	57.8	Lipids	脂质	Fatty Acyls	脂肪酰类	C18	Primary metabolite	-	-	HMDB0032798	M+H-2H2O	C21H40O9	9.16438	-	-	pos	-	-	-	-	Lipids and lipid-like molecules	Fatty Acyls	401.253	0.00456019266205	50.7	0.0966690732837231	-	Fatty alcohols	4.84703	4.85652	4.877673854619999	3.92052	3.89695	3.8777725958800007	3.8913	3.94505	3.8859
pos_4983	Beta-Betulenol	-	metab_4862	B(ii)	0	54.8	Terpenoids	萜类	Sesquiterpenoids	倍半萜	C18	Secondary metabolite	-	-	HMDB0036788	M+H	C15H24O	9.20202	-	-	pos	-	-	-	-	Lipids and lipid-like molecules	Prenol lipids	221.19	0.00542074	50.4	-0.643182	487-87-6	Sesquiterpenoids	3.16489	3.15991	3.1498	3.3510781408599994	3.36151	3.3408	3.47411	3.50683	3.4994182705300005
pos_4999	Acetoacetic acid	乙酰乙酸	metab_4878	B(i)	46.4	0	Organic acids and derivatives	有机酸及其衍生物	Organic acids and derivatives	有机酸及其衍生物	C18	Secondary metabolite	map01100;map00310;map00280;map00350;map00650	Metabolic pathways;Lysine degradation;Valine, leucine and isoleucine degradation;Tyrosine metabolism;Butanoate metabolism	HMDB0000060;LMFA01060003;PW_C000042	M+H-H2O	C4H6O3	9.35362	代谢途径;赖氨酸降解;缬氨酸、亮氨酸和异亮氨酸降解;酪氨酸代谢;丁酸代谢	C00164	pos	Organic acids	Carboxylic acids	Metabolism;Metabolism;Metabolism;Metabolism;Metabolism	Global and overview maps;Amino acid metabolism;Amino acid metabolism;Amino acid metabolism;Carbohydrate metabolism	Organic acids and derivatives	Keto acids and derivatives	85.0289	0.00685818302935	47.8	4.90990822603633	541-50-4	Short-chain keto acids and derivatives	2.7541926193700004	2.85605	2.83083	2.70484	2.74471	2.74938	2.78968	2.74363	2.70836
pos_5001	His-Val-Asn	-	metab_4880	B(i)	46.9	0	Others	其他类	Others	其他类	C18	Others	-	-	-	M+H	C15H24N6O5	9.35362	-	-	pos	-	-	-	-	-	-	369.191	0.00439650133018	47.1	6.6751655736776305	-	-	1.6431770116600002	1.64755	1.65678	1.75001	1.7382742455700002	1.74464	1.74313	1.7469274217299997	1.74047
pos_5002	Citroside A	香铁苷A	metab_4881	B(ii)	0	51.1	Terpenoids	萜类	Other terpenoids	其他萜类	C18	Secondary metabolite	-	-	HMDB0030370	M+H	C19H30O8	9.35362	-	-	pos	-	-	-	-	Lipids and lipid-like molecules	Prenol lipids	387.201	0.005407272493220001	49.3	-0.47224	120330-44-1	Terpene glycosides	2.7264314297900003	2.7309	2.74032	2.83528	2.82335	2.8298189755500003	2.82829	2.83215	2.8255806967900003
pos_5004	Xanthosine	黄嘌呤核苷	metab_4883	B(ii)	0	44.3	Nucleotides and derivatives	核苷酸及其衍生物	Nucleotides and derivatives	核苷酸及其衍生物	C18	Primary metabolite	map01100;map01110;map00230;map00232;map02010;map01232	Metabolic pathways;Biosynthesis of secondary metabolites;Purine metabolism;Caffeine metabolism;ABC transporters;Nucleotide metabolism	HMDB0000299	M+H-2H2O	C10H12N4O6	9.36435	代谢途径;次级代谢产物的生物合成;嘌呤代谢;咖啡因代谢;ABC转运器;核苷酸代谢	C01762	pos	-	-	Metabolism;Metabolism;Metabolism;Metabolism;Environmental Information Processing;Metabolism	Global and overview maps;Global and overview maps;Nucleotide metabolism;Biosynthesis of other secondary metabolites;Membrane transport;Global and overview maps	Nucleosides, nucleotides, and analogues	Purine nucleosides	249.06028401400002	0.00436456276139	46.9	-5.44632	146-80-5	Not Available	1.40717	1.41146	1.42055	1.89207	1.50083	1.52478	1.70111	1.50936	2.25895
pos_5014	3-Oxododecanoic acid	3 -氧代十二烷酸	metab_4893	B(i)	59	0	Organic acids and derivatives	有机酸及其衍生物	Organic acids and derivatives	有机酸及其衍生物	C18	Secondary metabolite	-	-	HMDB0010727;PW_C006734	M+H-2H2O	C12H22O3	9.419716666669999	-	C02367	pos	-	-	-	-	Organic acids and derivatives	Keto acids and derivatives	179.143	0.0020781139167400002	51.5	0.144381479207626	-	Medium-chain keto acids and derivatives	3.2511	3.1047679661500003	3.19525	3.21859	3.26919	3.22533	3.12467	3.07749	3.02378
pos_5017	Ar-Tenuifolene	-	metab_4896	B(i)	69.7	0	Others	其他类	Others	其他类	C18	Others	-	-	-	M+H	C15H20	9.43042	-	-	pos	-	-	-	-	-	-	201.16369875400002	0.00847427363245	53.5	-0.391291	-	-	2.49934	2.37298	2.42476	2.95223	2.96257	3.01218	3.17302	3.08031	3.10235
pos_5020	Repandin D	-	metab_4899	B(i)	80.2	0	Others	其他类	Others	其他类	C18	Others	-	-	-	M+H	C26H34O10	9.43042	-	-	pos	-	-	-	-	-	-	507.22	0.00670024120064	53.5	-4.70678	-	-	1.8726889757700005	1.8771	1.88642	1.98042	1.99426	1.97501	2.92667	2.5815	2.73739
pos_5026	Neocnidilide	丁基四氢异苯并呋哺酮	metab_4905	B(i)	69.8	0	Others	其他类	Others	其他类	C18	Others	-	-	HMDB0034450;HMDB0302242;HMDB0034450	M+H	C12H18O2	9.462266666669999	-	C17002	pos	-	-	-	-	Organoheterocyclic compounds	Isobenzofurans	195.138	0.00232044	53.3	0.0535302493480034	4567-33-3	Not Available	4.78362	4.76675	4.78276	4.7298	4.752257638490001	4.73811	4.71606	4.66478	4.67163
pos_5039	Fingolimod	芬戈莫德	metab_4918	B(ii)	0	73.2	Others	其他类	Amines and derivatives	胺类及其衍生物	C18	Others	-	-	HMDB0252262	M+ACN+H	C19H33NO2	9.502766666669999	-	-	pos	-	-	-	-	Organic nitrogen compounds	Organonitrogen compounds	349.285	0.00509575778096	53.9	-0.709469	-	Amines	4.36491	4.367	4.41366	5.19385	5.1978600134300015	5.240639299780001	4.6678	4.62328	4.61762
pos_5051	Gibberellin A37 glucosyl ester	赤霉素A37葡萄糖酯	metab_4930	B(ii)	0	76.5	Terpenoids	萜类	Diterpene glycosides	二萜糖苷	C18	Secondary metabolite	-	-	HMDB0038611	M+H	C26H36O10	9.56653	-	-	pos	-	-	-	-	Lipids and lipid-like molecules	Prenol lipids	509.236	0.00525753429126	53.4	-4.34532	36702-72-4	Terpene glycosides	1.92347	1.92789	1.93722	2.03134	2.01951	2.03027	2.02441	2.02824	2.02172
pos_5064	Flossonol	-	metab_4943	B(i)	46.3	0	Others	其他类	Others	其他类	C18	Others	-	-	-	M+H	C13H16O3	9.74992	-	C09928	pos	-	-	-	-	-	-	221.11711969900003	0.0012796820384500002	47.3	-0.45934	112936-00-2	-	3.54594	3.57261	3.52577	3.52897	3.562803278530001	3.56035	3.6177	3.5649	3.59753
pos_5065	Protoemetine	-	metab_4944	B(i)	83.9	0	Others	其他类	Quinolizidines	喹诺里西啶类	C18	Others	map00950;map01110	Isoquinoline alkaloid biosynthesis;Biosynthesis of secondary metabolites	-	M+H	C19H27NO3	9.74992	异喹啉生物碱生物合成;次级代谢产物的生物合成	C11816	pos	-	-	Metabolism;Metabolism	Biosynthesis of other secondary metabolites;Global and overview maps	-	-	318.20618954599996	0.0046305737845	56	-0.569406	549-91-7	-	4.04172	4.00542	3.99569	3.80888	3.83698	3.78637	2.4143	1.81441	2.1408146990400003
pos_5067	17beta-Dihydroequilin	-	metab_4946	B(i)	72	0	Steroids and steroid derivatives	甾体及其衍生物	Hydroxysteroids	羟基甾体	C18	Secondary metabolite	-	-	-	M+H	C18H22O2	9.76235	-	C14485	pos	-	-	-	-	-	-	271.169	0.0027076652677199995	53.4	-0.665153	3563-27-7	-	3.05399	3.00177	3.10525	3.13738	3.15152	3.15094	3.03731	3.00945	3.0470955553400003
pos_5090	(+/-)-(E)-13-Hydroxy-10-oxo-11-octadecenoic acid	-	metab_4969	B(ii)	0	78.3	Lipids	脂质	Fatty Acyls	脂肪酰类	C18	Primary metabolite	-	-	HMDB0040900	M+H	C18H32O4	9.90007	-	-	pos	-	-	-	-	Lipids and lipid-like molecules	Fatty Acyls	313.237	0.0045965622647	54.8	-1.03643	28979-44-4	Lineolic acids and derivatives	4.588730364069999	4.607879930769999	4.6289165822900005	5.17883	5.16325	5.16916	4.73725	4.68527	4.72463
pos_5092	2-[4-Methyl-2-(2-methylpropoxy)phenyl]-2-[(2-methylpropoxy)methyl]-oxirane	-	metab_4971	B(i)	82.7	0	Others	其他类	Phenol ethers	酚醚类	C18	Others	-	-	-	M+H	C18H28O3	9.90908	-	-	pos	-	-	-	-	-	-	293.211	0.00315861848578	55.7	-0.74029	-	-	4.9418	4.962712847200001	4.97312	5.13083	5.1313686918400006	5.12738	4.819950778969999	4.78316	4.80398
pos_5095	13-Hydroxy-9-methoxy-10-oxo-11-octadecenoic acid	13 -羟基- 9 -甲氧基- 10 -氧代- 11 -十八碳烯酸	metab_4974	B(ii)	0	80.1	Lipids	脂质	Fatty Acyls	脂肪酰类	C18	Primary metabolite	-	-	HMDB0040901	M+NH4	C19H34O5	9.90908	-	-	pos	-	-	-	-	Lipids and lipid-like molecules	Fatty Acyls	360.274	0.00603912982586	55	-0.902858	150147-08-3	Lineolic acids and derivatives	3.5994615535400003	3.69275	3.60684	3.7783	3.80976	3.79295	3.39817	3.4299950050800003	3.47947
pos_5096	2-Methoxyestrone 3-glucuronide	2-甲氧基雌酮3-葡萄糖醛酸苷	metab_4975	B(ii)	0	46.6	Steroids and steroid derivatives	甾体及其衍生物	Other steroids and steroid derivatives	其他类甾体及其衍生物	C18	Secondary metabolite	-	-	HMDB0004482	M+CH3OH+H	C25H32O9	9.90908	-	C11132	pos	-	-	-	-	Lipids and lipid-like molecules	Steroids and steroid derivatives	509.236	0.0024682420133499998	47.6	-4.96058	25577-70-2	Steroidal glycosides	3.23738	3.2878877334500003	3.22487	3.19573	3.3328568904900004	3.06633	3.76486	3.5522	3.73115
pos_5102	Ecklonialactone A	-	metab_4981	B(i)	90.1	0	Others	其他类	Macrolides and derivatives	大环内酯类及其衍生物	C18	Others	-	-	-	M+H	C18H26O3	9.98928	-	-	pos	-	-	-	-	-	-	291.195	0.004649785874449999	57.1	-0.628216	-	-	4.31534	4.33825	4.32811	4.22126	4.21232	4.19067	4.11114	4.05632	4.12021
pos_5115	(+)-delta-Cadinene	（+）-三角洲卡丁烯	metab_4994	B(i)	47.2	0	Terpenoids	萜类	Sesquiterpenoids	倍半萜	C18	Secondary metabolite	map01100;map01110;map00909	Metabolic pathways;Biosynthesis of secondary metabolites;Sesquiterpenoid and triterpenoid biosynthesis	HMDB0035084;LMPR0103330001	M+H	C15H24	10.1143	代谢途径;次级代谢产物的生物合成;倍半萜和三萜生物合成	C06394	pos	-	-	Metabolism;Metabolism;Metabolism	Global and overview maps;Global and overview maps;Metabolism of terpenoids and polyketides	Lipids and lipid-like molecules	Prenol lipids	205.195	0.00817625218531	48.9	-0.200926	483-76-1	Sesquiterpenoids	2.81854	2.88956	2.81736	2.9451974672600003	2.93314	2.86164	3.04441	2.97923	2.92984
pos_5117	Corrin	咕啉	metab_4996	B(i)	83.6	0	Others	其他类	Tetrapyrroles and derivatives	四吡咯及其衍生物	C18	Others	-	-	HMDB0250457	M+H	C19H22N4	10.125083333300001	-	-	pos	-	-	-	-	Organoheterocyclic compounds	Tetrapyrroles and derivatives	307.19	0.00295745635932	54.6	-4.95951	-	Not Available	4.63909	4.64982	4.69349	4.79135	4.79692	4.77216	4.67623	4.65538	4.684123351509999
pos_5122	Ile-Thr-His-Asp	-	metab_5001	B(i)	38	0	Others	其他类	Others	其他类	C18	Others	-	-	-	M+H	C20H32N6O8	10.192883333300001	-	-	pos	-	-	-	-	-	-	485.23166473199996	0.00704748102452	45.1	-7.79325	-	-	2.67925	2.8760120222500003	3.0004	3.02588	3.25448	3.10149	3.89242648658e-05	2.08296	2.06463
pos_5124	(E)-2-Tridecene-4,6,8-triyn-1-ol	（E） -2-十三碳烯-4,6,8-三炔-1-醇	metab_5003	B(ii)	0	43.1	Lipids	脂质	Fatty Acyls	脂肪酰类	C18	Primary metabolite	-	-	HMDB0030931	M+NH4	C13H14O	10.2143	-	-	pos	-	-	-	-	Lipids and lipid-like molecules	Fatty Acyls	204.138	0.005353677740239999	45.6	0.173917793458051	-	Fatty alcohols	2.8509	2.78544	2.9229	2.76562	2.77547	2.83324	2.80044	2.87722	2.82368
pos_5126	Humulenol I	葎草烯醇I	metab_5005	B(ii)	0	71.3	Terpenoids	萜类	Sesquiterpenoids	倍半萜	C18	Secondary metabolite	-	-	HMDB0038211	M+H	C15H24O	10.2648	-	-	pos	-	-	-	-	Lipids and lipid-like molecules	Prenol lipids	221.18988914599998	0.00574866919079	53.8	-0.466319	19888-01-8	Sesquiterpenoids	2.89807	2.82438	2.97558	3.26545	3.2198	3.15816	3.28145	3.2877557741000003	3.31749
pos_5127	Albocycline M-6	-	metab_5006	B(i)	93.7	0	Others	其他类	Macrolides and derivatives	大环内酯类及其衍生物	C18	Others	-	-	-	M+H-H2O	C18H30O5	10.2648	-	-	pos	-	-	-	-	-	-	309.206	0.0033529296287399995	57.9	-0.680427	-	-	4.07384	4.0614	4.1352126696800005	4.0465819119300015	4.03952	4.01962	3.912322315880001	3.93589	3.90809
pos_5128	Ile-His-Ala-Glu	-	metab_5007	B(i)	45.6	0	Others	其他类	Others	其他类	C18	Others	-	-	-	M+H	C20H32N6O7	10.2648	-	-	pos	-	-	-	-	-	-	469.24323492800005	0.00906385348194	47.5	5.790071216427441	-	-	3.0097597517500003	2.8243	3.23993	3.41357	3.46988	3.38271	3.74524	3.75677	3.73899
pos_5137	5-Isopropyl-2-(2-methylpropyl)-2-cyclohexen-1-one	5-异丙基-2-（2-甲基丙基）-2-环己烯-1-酮	metab_5016	B(ii)	0	57.8	Terpenoids	萜类	Monoterpenoids	单萜	C18	Secondary metabolite	-	-	HMDB0038216	M+H-H2O	C13H22O	10.3441	-	-	pos	-	-	-	-	Lipids and lipid-like molecules	Prenol lipids	177.164	0.00271190018713	51.3	-0.112289	79862-15-0	Monoterpenoids	3.07256	3.0599199002900006	3.11067	3.66285	3.74906	3.71204	4.81873	4.80301	4.82758
pos_5143	Valerenic acid	缬草烯酸	metab_5022	B(ii)	0	58	Terpenoids	萜类	Sesquiterpenoids	倍半萜	C18	Secondary metabolite	-	-	HMDB0030016	M+H	C15H22O2	10.3834	-	C09743	pos	-	-	-	-	Lipids and lipid-like molecules	Prenol lipids	235.169	0.00712303306445	51	-0.619541	3569/10/6;3569-10-6	Sesquiterpenoids	3.19212	3.17153	3.23928	3.27905	3.1935380513200005	3.26408	3.33772	3.37181	3.36781
pos_5160	Betaenone A	-	metab_5039	B(i)	42.5	0	Terpenoids	萜类	Sesquiterpenoids	倍半萜	C18	Secondary metabolite	-	-	-	M+H	C21H34O5	10.5321	-	-	pos	-	-	-	-	-	-	367.247	0.0037829474028699996	47.1	-2.03531	-	-	4.68681	4.718866455490001	4.77021	4.6522730906800005	4.63456	4.65008	4.45209	4.48351	4.44681
pos_5161	Dehydrooreadone	脱氢脲酮	metab_5040	B(ii)	0	48.8	Others	其他类	Others	其他类	C18	Others	-	-	HMDB0036046	M+H	C14H18O3	10.5428	-	-	pos	-	-	-	-	Organoheterocyclic compounds	Naphthofurans	235.133	0.006531487735079999	49.1	-0.391894	124869-07-4	Not Available	4.72365	4.74703	4.795596216730001	3.89967	3.8321813678699987	3.86348	3.8171288303699993	3.79934	3.76253
pos_5164	8(S)-HETrE	8（S）-HETrE	metab_5043	B(i)	77.4	0	Lipids	脂质	Fatty Acyls	脂肪酰类	C18	Primary metabolite	-	-	LMFA03050029	M+H	C20H34O3	10.5625	-	-	pos	-	-	-	-	-	-	323.258	0.0082114993801	54.7	-0.557646	-	-	3.5762990048800005	3.65873	3.6722495990900006	3.62213	3.5948	3.59927	4.00588	3.94857	4.02556
pos_5165	Cibaric acid	枸橼酸	metab_5044	B(ii)	0	61.4	Lipids	脂质	Fatty Acyls	脂肪酰类	C18	Primary metabolite	-	-	HMDB0038580	M+NH4	C18H28O5	10.5625	-	-	pos	-	-	-	-	Lipids and lipid-like molecules	Fatty Acyls	342.22733975200003	0.00441817544989	51.9	-0.492835	130523-93-2	Lineolic acids and derivatives	4.0782423034800015	4.0797	4.12594	4.04682	4.00521	4.02674	4.17015	4.13605	4.17249
pos_5168	Onchidal	-	metab_5047	B(i)	86.8	0	Terpenoids	萜类	Sesquiterpenoids	倍半萜	C18	Secondary metabolite	-	-	-	M+H	C17H24O3	10.5785	-	C20000	pos	-	-	-	-	-	-	277.18	0.006477853518149999	56.7	-0.437676	67656-42-2	-	3.5546715306400003	3.54466	3.5792394629900004	3.812426157340001	3.84328	3.94081	3.90926	3.863	3.90989
pos_5171	6-Oxo-7(9)-dehydro-6,7-dihydrogeranyl acetate	-	metab_5050	B(i)	47.2	0	Lipids	脂质	Fatty Acyls	脂肪酰类	C18	Primary metabolite	-	-	-	M+H-H2O	C12H18O3	10.5944	-	-	pos	-	-	-	-	-	-	193.122	0.005938433787819999	48.8	0.133845853473646	-	-	3.60555	3.57185	3.66153	3.76865	3.73024	3.79989	3.62851	3.6029	3.57529
pos_5184	3-Ethyl-4-methylphenol	3 -乙基- 4 -甲基苯酚	metab_5063	B(ii)	0	43.3	Others	其他类	Others	其他类	C18	Others	-	-	HMDB0038986	M+H-H2O	C9H12O	10.6544	-	-	pos	-	-	-	-	Benzenoids	Phenols	119.086	0.0049149695018699995	48	1.2079688145563998	6161-67-7	Cresols	3.33919	3.33512	3.35306	3.36928	3.38413	3.3837080804500004	3.4341	3.47434	3.49491
pos_5187	Micrandrol D	-	metab_5066	B(i)	74.2	0	Others	其他类	Naphthopyrans	萘并吡喃类	C18	Others	-	-	-	M+H	C18H24O3	10.6544	-	-	pos	-	-	-	-	-	-	289.18	0.00413617196635	54.1	-0.701846	-	-	3.18423	3.11787	3.25956	2.9827647402900004	2.87764	3.0146751819700004	2.89897	3.0914012745700004	2.77285
pos_5191	(3beta,5beta,8beta,22E,24xi)-Ergosta-6,22-diene-3,5,8-triol	（3beta，5beta，8beta，22E，24xi）-麦角甾-6,22-二烯-3,5,8-三醇	metab_5070	B(ii)	0	51.6	Steroids and steroid derivatives	甾体及其衍生物	Ergostane steroids	麦角甾烷	C18	Secondary metabolite	-	-	HMDB0038353	M+	C28H46O3	10.6669	-	-	pos	-	-	-	-	Lipids and lipid-like molecules	Steroids and steroid derivatives	430.346	0.0017703421265199998	48.1	3.97150635175082	288847-52-9	Ergostane steroids	5.97604	6.01899	6.13209	6.1858163926100005	6.15736	6.193330570930001	6.2509125584500005	6.27949	6.26695
pos_5202	Narbonolide	-	metab_5081	B(i)	84.5	0	Others	其他类	Macrolides and derivatives	大环内酯类及其衍生物	C18	Others	map01100;map01110	Metabolic pathways;Biosynthesis of secondary metabolites	-	M+H	C20H32O5	10.736	代谢途径;次级代谢产物的生物合成	C11997	pos	-	-	Metabolism;Metabolism	Global and overview maps;Global and overview maps	-	-	353.23	0.00518560990193	54.2	-7.48374	-	-	4.04848	4.04474	4.07908	4.51197	4.480067389549999	4.52395	3.90114	3.9292320898300006	3.95994
pos_5205	Albocycline	白环菌素	metab_5084	B(i)	91	0	Others	其他类	Macrolides and derivatives	大环内酯类及其衍生物	C18	Others	-	-	-	M+H	C18H28O4	10.759	-	-	pos	-	-	-	-	-	-	309.20565946799996	0.0022497188766599997	57.2	-1.22109	-	-	4.26803	4.2939949997500015	4.317120501630002	4.37794	4.3098259366199985	4.38122	4.30627	4.28756	4.31243
pos_5210	Tuberatolide A	-	metab_5089	B(i)	93.6	0	Others	其他类	Others	其他类	C18	Others	-	-	-	M+H	C18H26O3	10.7697	-	-	pos	-	-	-	-	-	-	291.195	0.0025044250541599996	57.7	-1.2205	-	-	4.48437	4.516932946619999	4.5274	4.55323	4.556275111230001	4.55891	4.47979	4.48091	4.51974
pos_5212	Ieodomycin C	-	metab_5091	B(i)	82	0	Organic acids and derivatives	有机酸及其衍生物	Organic acids and derivatives	有机酸及其衍生物	C18	Secondary metabolite	-	-	LMFA01050564	M+H	C12H20O4	10.790716666700002	-	-	pos	-	-	-	-	-	-	229.143	0.0059119703501700005	55.7	-0.465807	-	-	3.71414	3.73392	3.78222	3.63742	3.56202	3.60518	3.49248	3.47363	3.43757
pos_5218	(3b,4b,11b,14b)-11-Ethoxy-3,4-epoxy-14-hydroxy-12-cyathen-15-al 14-xyloside	（3b，4b，11b，14b）-11-乙氧基-3,4-环氧-14-羟基-12-氰基-15-al 14-木糖苷	metab_5097	B(ii)	0	45.5	Terpenoids	萜类	Diterpenoids	二萜	C18	Secondary metabolite	-	-	HMDB0034617	M+H	C27H42O8	10.8118	-	-	pos	-	-	-	-	Lipids and lipid-like molecules	Prenol lipids	495.295	0.00199820086501	48.5	-0.428062	178120-49-5	Diterpenoids	3.6877	3.62798	3.73786	3.9528	3.95988	3.919119185340001	3.8701430933800007	3.8599	3.70866
pos_5220	3-Methylbenzaldehyde	3 -甲基苯甲醛	metab_5099	B(i)	74.7	0	Others	其他类	Others	其他类	C18	Others	map01100	Metabolic pathways	HMDB0029637;HMDB0303310	M+H	C8H8O	10.8345	代谢途径	C07209	pos	-	-	Metabolism	Global and overview maps	Benzenoids	Benzene and substituted derivatives	121.065	0.0012521162879500002	54.4	1.25933579933776	620-23-5	Benzoyl derivatives	4.3668836023400015	4.35513	4.37991	4.4595540516800005	4.3882951009900015	4.42081	4.59514	4.57293	4.53694
pos_5222	Hydroxytyrosol 1-O-glucoside	羟基酪醇1 - O -葡萄糖苷	metab_5101	B(ii)	0	51	Carbohydrates and derivatives	碳水化合物及其衍生物	O-glycosyl compounds	O-糖基化合物	C18	Primary metabolite	-	-	HMDB0041024	M+H-2H2O	C14H20O8	10.8345	-	-	pos	-	-	-	-	Organic oxygen compounds	Organooxygen compounds	281.102	0.0016251261397899998	49.2	-1.26154	76873-99-9	Carbohydrates and carbohydrate conjugates	4.46327	4.46227	4.4682	4.54697	4.46987	4.5072483099900005	4.67374	4.66996	4.61874
pos_5224	Burseran	-	metab_5103	B(i)	88.2	0	Lignans and derivatives	木脂素类及其衍生物	Lignans and derivatives	木脂素类及其衍生物	C18	Secondary metabolite	-	-	-	M+H	C22H26O6	10.8345	-	C10547	pos	-	-	-	-	-	-	387.18	0.00195697421669	56.7	-0.639988	23284-23-3	-	6.436858250219999	6.42524	6.4508483860300005	6.52252	6.47349	6.49951	6.66686	6.65959	6.61897
pos_5225	Lys-Cys-His	-	metab_5104	B(i)	70.1	0	Others	其他类	Others	其他类	C18	Others	-	-	-	M+NH4	C15H26N6O4S	10.8345	-	-	pos	-	-	-	-	-	-	404.206	0.00140948457478	51.6	-2.52276	-	-	5.494843349430001	5.466234410040001	5.49773	5.57301	5.52313	5.56081	5.7183614272800005	5.71184	5.66541
pos_5230	Beta-Farnesene	-	metab_5109	B(i)	62.6	0	Terpenoids	萜类	Sesquiterpenoids	倍半萜	C18	Secondary metabolite	map01110;map00909	Biosynthesis of secondary metabolites;Sesquiterpenoid and triterpenoid biosynthesis	HMDB0062763;HMDB0035913	M+H	C15H24	10.8572	次级代谢产物的生物合成;倍半萜和三萜生物合成	C09666	pos	-	-	Metabolism;Metabolism	Global and overview maps;Metabolism of terpenoids and polyketides	Lipids and lipid-like molecules	Prenol lipids	205.195	0.00234805550963	52.1	-0.386531	18794-84-8	Sesquiterpenoids	2.4211	2.4115341817400004	2.5771	2.61276	2.4222077580200003	2.35105	2.76383	2.80869	2.63807
pos_5234	Stolonoxide E	-	metab_5113	B(i)	71.3	0	Others	其他类	Others	其他类	C18	Others	-	-	-	M+H	C24H36O5	10.8712	-	-	pos	-	-	-	-	-	-	405.26331400099997	0.00729417425912	53.2	-0.585479	-	-	4.23125	4.24577	4.22307	4.11596	4.08148	4.11992	3.53979	3.5204	3.53223
pos_5237	Phytosphingosine	植物鞘氨醇	metab_5116	B(i)	99.1	0	Others	其他类	Amines and derivatives	胺类及其衍生物	C18	Others	map00600;map01100	Sphingolipid metabolism;Metabolic pathways	HMDB0004610;HMDB0004628;HMDB0004610;LMSP01030001	M+H	C18H39NO3	10.9122	鞘脂代谢;代谢途径	C12144	pos	-	-	Metabolism;Metabolism	Lipid metabolism;Global and overview maps	Organic nitrogen compounds	Organonitrogen compounds	318.3	0.00435749296974	58.9	-0.636105	554-62-1	Amines	5.15637	5.20275	5.1983701275300005	5.402872717159999	5.393598955369999	5.4049	5.495290049369999	5.4752	5.4651322894500005
pos_5240	4-carvomenthenol	4-松油醇	metab_5119	B(i)	45	0	Terpenoids	萜类	Monoterpenoids	单萜	C18	Secondary metabolite	-	-	HMDB0035833	M+H	C10H18O	10.947583333299999	-	C17073	pos	-	-	-	-	Lipids and lipid-like molecules	Prenol lipids	155.143	0.0074314920503199995	48.5	-0.294217	562-74-3	Monoterpenoids	3.11677	3.1235611134400005	3.0731283946900003	3.40819	3.34514	3.37794	3.08938	3.09199	3.09361
pos_5241	Cladospolide B	-	metab_5120	B(i)	71.2	0	Others	其他类	Macrolides and derivatives	大环内酯类及其衍生物	C18	Others	-	-	-	M+H	C12H20O4	10.947583333299999	-	-	pos	-	-	-	-	-	-	229.143	0.0050900081811499995	53.8	-0.31161	-	-	3.84929	3.82617	3.8635647990900006	3.9725	3.94087	3.95489	3.64716	3.618979302780001	3.60801
pos_5256	10-Oxo-11-octadecen-13-olide	10 -氧代- 11 -十八碳烯- 13 -内酯	metab_5135	B(ii)	0	63.8	Others	其他类	Macrolides and derivatives	大环内酯类及其衍生物	C18	Others	-	-	HMDB0029786	M+Na	C18H30O3	11.038483333299999	-	-	pos	-	-	-	-	Phenylpropanoids and polyketides	Macrolides and analogues	317.211	0.00771218814716	50.6	7.5205458798159	-	Not Available	1.6862435584200002	1.69415	1.69988	1.7932799875499998	1.89543	1.7879	2.3616045748500003	1.99388	2.22635
pos_5260	3alpha,17alpha,21-Trihydroxy-5beta-pregnan-20-one	-	metab_5139	B(i)	88.1	0	Steroids and steroid derivatives	甾体及其衍生物	Hydroxysteroids	羟基甾体	C18	Secondary metabolite	-	-	HMDB0005972	M+H	C21H34O4	11.090416666700001	-	C14594	pos	-	-	-	-	Lipids and lipid-like molecules	Steroids and steroid derivatives	351.253	0.0036778795722399995	56.8	-0.490144	68-60-0	Hydroxysteroids	5.07039	5.12517	5.15341	5.396526904530001	5.33019	5.35908	5.23263	5.19153	5.20107
pos_5271	C16 Sphingosine	-	metab_5150	B(i)	99	0	Others	其他类	Amines and derivatives	胺类及其衍生物	C18	Others	-	-	HMDB0242181;LMSP01040008	M+H	C16H33NO2	11.155683333299999	-	-	pos	-	-	-	-	Organic nitrogen compounds	Organonitrogen compounds	272.258	0.00405342210492	59.1	-0.584151	-	Amines	5.58797	5.5899282983099985	5.59371	5.71128	5.70465	5.64082	5.7726	5.74012	5.755755879500001
pos_5272	Porrigenic acid	-	metab_5151	B(i)	89.5	0	Lipids	脂质	Fatty Acyls	脂肪酰类	C18	Primary metabolite	-	-	LMFA01060225	M+H	C18H30O4	11.155683333299999	-	-	pos	-	-	-	-	-	-	311.22146580000003	0.006468250936960001	57.1	-0.709421	-	-	3.93903	3.99654	3.97624	4.4332	4.4064912323100005	4.40666	4.04471	4.10302	4.0606
pos_5275	Cyclosativene	环苜蓿烯	metab_5154	B(i)	64	0	Terpenoids	萜类	Sesquiterpenoids	倍半萜	C18	Secondary metabolite	-	-	HMDB0302487	M+H	C15H24	11.166383333299999	-	-	pos	-	-	-	-	Lipids and lipid-like molecules	Prenol lipids	205.19505284099998	0.0103642069659	52.4	-0.119306	-	Sesquiterpenoids	2.68898	2.74926	2.6874478365900005	2.8187108387800004	2.7275755747500003	2.78438	2.8866939468799995	2.96106	2.82735
pos_5283	Phytocassane D	商陆皂苷甲D	metab_5162	B(ii)	0	42.7	Terpenoids	萜类	Diterpenoids	二萜	C18	Secondary metabolite	-	-	HMDB0041057	M+H	C20H28O3	11.241933333299999	-	-	pos	-	-	-	-	Lipids and lipid-like molecules	Prenol lipids	317.211	0.0028775419106599996	47.7	0.246608833832874	166547-24-6	Diterpenoids	1.66213	1.66651	1.67575	1.76906	1.75731	1.7636828648500005	1.76218	2.12246	2.16059
pos_5293	Cafestol	咖啡醇	metab_5172	B(ii)	0	47	Others	其他类	Others	其他类	C18	Others	-	-	HMDB0035710	M+CH3OH+H	C20H28O3	11.3239	-	C09066	pos	-	-	-	-	Organoheterocyclic compounds	Naphthofurans	349.23718279400003	0.008883614277290001	48.7	-0.484315	469-83-0	Not Available	4.93352	4.973996039419999	4.9837994429400005	4.59389	4.58714	4.57192	4.55567	4.55239	4.57836
pos_5297	Alantolactone	土木香内酯	metab_5176	B(i)	62.7	0	Others	其他类	Others	其他类	C18	Others	-	-	HMDB0035906;LMPR0103190013	M+H	C15H20O2	11.3652	-	C09289	pos	-	-	-	-	Lipids and lipid-like molecules	Prenol lipids	233.15346005799998	0.005265340026229999	51.9	-0.630008	546-43-0	Terpene lactones	3.2135	3.23648	3.23743	3.11183	3.04848	2.99761	2.9952841690400005	2.95266	2.9462223053400005
pos_5307	Cespitularin D	-	metab_5186	B(i)	50.9	0	Others	其他类	Others	其他类	C18	Others	-	-	-	M+H	C20H28O4	11.3832	-	-	pos	-	-	-	-	-	-	333.20338618700004	0.00647156403575	47.3	-7.97601	-	-	4.21888	4.2803	4.28149	4.36254	4.34822	4.34015	4.55131	4.5436081897400005	4.55391
pos_5308	Heteroplexisolide E	-	metab_5187	B(i)	65.2	0	Others	其他类	Lactones	内酯类	C18	Others	-	-	-	M+H	C13H18O3	11.3957	-	-	pos	-	-	-	-	-	-	223.133	0.00560022052752	52.4	-0.510683	-	-	3.59949	3.6775	3.6657	3.71591	3.74377	3.69945	3.74917	3.75184	3.7731
pos_5309	Lemnaliadione	-	metab_5188	B(i)	40.2	0	Others	其他类	Others	其他类	C18	Others	-	-	-	M+CH3OH+H	C14H20O3	11.3957	-	-	pos	-	-	-	-	-	-	269.17460312599997	0.00519352517565	47.6	-0.561336	-	-	5.21425	5.24269	5.25123	5.02798	5.02634	5.02402	4.7832234519800005	4.7775033997300005	4.782970434569999
pos_5310	Auxin b	-	metab_5189	B(ii)	0	65.6	Terpenoids	萜类	Monoterpenoids	单萜	C18	Secondary metabolite	-	-	HMDB0038484	M+H	C18H30O4	11.3957	-	-	pos	-	-	-	-	Lipids and lipid-like molecules	Prenol lipids	311.221	0.00411168170604	52.4	-0.629168	-	Monoterpenoids	4.57689	4.596292944119999	4.625	4.70467	4.7106	4.67192	4.66117	4.66929	4.69917
pos_5311	11,12-dhet	-	metab_5190	B(i)	93.8	0	Others	其他类	Others	其他类	C18	Others	map00590;map01100	Arachidonic acid metabolism;Metabolic pathways	HMDB0002314	M+H	C20H34O4	11.3957	花生四烯酸代谢;代谢途径	C14774	pos	-	-	Metabolism;Metabolism	Lipid metabolism;Global and overview maps	Lipids and lipid-like molecules	Fatty Acyls	339.253	0.006771740676100001	58	-0.668883	-	Eicosanoids	2.87463	2.95	2.8264	2.7733656159500004	2.84113	2.8982925017000003	3.11092	3.06235	3.1490259353900005
pos_5319	Cinncassiol D2	-	metab_5198	B(ii)	0	44.7	Terpenoids	萜类	Sesquiterpenoids	倍半萜	C18	Secondary metabolite	-	-	HMDB0034678	M+CH3OH+Na	C20H32O6	11.4421	-	C17653	pos	-	-	-	-	Lipids and lipid-like molecules	Prenol lipids	423.23523697699994	0.00508306602104	48.2	-0.140587	77751-33-8	Sesquiterpenoids	4.30927	4.44111	4.35897	3.94387	3.9367	3.95732	3.91647	3.80132	3.8455
pos_5322	6-Deoxyerythronolide B	-	metab_5201	B(i)	84.7	0	Others	其他类	Macrolides and derivatives	大环内酯类及其衍生物	C18	Others	map01100;map01110	Metabolic pathways;Biosynthesis of secondary metabolites	LMPK04000002	M+H-H2O	C21H38O6	11.475966666700002	代谢途径;次级代谢产物的生物合成	C03240	pos	-	-	Metabolism;Metabolism	Global and overview maps;Global and overview maps	-	-	369.263	0.00532228106632	56	-0.325192	15797-36-1	-	5.08132	5.07378	5.0933	4.93963	4.9386	4.9321	4.64787	4.62701	4.64247
pos_5326	Eicosapentaenoic acid	二十碳五烯酸	metab_5205	B(i)	35.2	0	Lipids	脂质	Fatty Acyls	脂肪酰类	C18	Primary metabolite	map01040	Biosynthesis of unsaturated fatty acids	HMDB0001999;PW_C001337	M+NH4	C20H30O2	11.5052	不饱和脂肪酸的生物合成	C06428	pos	Lipids	Fatty acids	Metabolism	Lipid metabolism	Lipids and lipid-like molecules	Fatty Acyls	320.258	0.0037315014474999996	45.8	-0.448569	10417-94-4	Fatty acids and conjugates	4.01559	4.022	4.00908	3.97705	3.96349	3.94017	3.59646	3.66132	3.61967
pos_5333	Gajutsulactone A	-	metab_5212	B(i)	69.5	0	Others	其他类	Others	其他类	C18	Others	-	-	-	M+H	C15H22O2	11.5481	-	-	pos	-	-	-	-	-	-	235.169	0.00542489593197	53.4	-0.54256	-	-	4.15035	4.1288273330699985	4.1742238462699985	4.26348	4.2562410037000005	4.2347907867900005	4.31013	4.35233	4.33655
pos_5335	2-Methoxy-5Z-hexadecenoic acid	-	metab_5214	B(i)	54.2	0	Lipids	脂质	Fatty Acyls	脂肪酰类	C18	Primary metabolite	-	-	LMFA01080001	M+H	C17H32O3	11.5606	-	C13792	pos	-	-	-	-	-	-	285.24227717400004	0.0057407596926599995	50.3	-0.507124	-	-	3.22542	3.20832	3.2611318017400004	2.67438	2.61893	2.51145	2.55144	2.7565305491400003	2.83907
pos_5340	Cespitularin F	-	metab_5219	B(i)	43.8	0	Others	其他类	Alcohols and derivatives	醇类及其衍生物	C18	Others	-	-	-	M+H	C20H28O3	11.6036	-	-	pos	-	-	-	-	-	-	317.211	0.00501671	48	-0.462967	-	-	1.63662	1.91693	1.73186	2.53357	2.34639	2.2869587620200003	2.92812	3.0864222386400004	2.915
pos_5341	2beta,3beta,4beta-Trihydroxypregnan-16-one	-	metab_5220	B(i)	80.9	0	Steroids and steroid derivatives	甾体及其衍生物	Pregnane steroids	孕甾烷	C18	Secondary metabolite	-	-	-	M+H	C21H34O4	11.6036	-	-	pos	-	-	-	-	-	-	351.253	0.00258257543506	55.3	-0.481493	-	-	5.34152	5.3275	5.35044	5.1585742987800005	5.13831	5.14547	4.92685	4.89254	4.88927
pos_5351	Isoboonein	-	metab_5230	B(i)	68.2	0	Others	其他类	Others	其他类	C18	Others	-	-	-	M+H	C9H14O3	11.682333333299999	-	-	pos	-	-	-	-	-	-	171.102	0.00275969345325	52.9	-0.105475	-	-	4.00207	3.95034	3.99547	4.24086	4.24633	4.24217	4.01115	3.98081	4.03112
pos_5355	Azelaic acid	壬二酸	metab_5234	B(i)	62.8	0	Lipids	脂质	Fatty Acyls	脂肪酰类	C18	Primary metabolite	-	-	HMDB0000784;LMFA01170054	M+H	C9H16O4	11.6948	-	C08261	pos	-	-	-	-	Lipids and lipid-like molecules	Fatty Acyls	189.112	0.004481899846890001	52.1	-0.248133	123-99-9	Fatty acids and conjugates	3.55746	3.43642	3.50619	3.82886	3.79199	3.81031	3.4391	3.40028	3.38995
pos_5365	(Z)-Octadec-12-ene-8,10-diynoic acid	-	metab_5244	B(i)	90.1	0	Lipids	脂质	Fatty Acyls	脂肪酰类	C18	Primary metabolite	-	-	-	M+H	C18H26O2	11.7751	-	-	pos	-	-	-	-	-	-	275.2	0.00417068626528	57.3	-0.390682	-	-	4.74605	4.7919286878300005	4.7823	4.7192182454300005	4.69057	4.69158	4.651621731600001	4.5946	4.63457
pos_5366	9,10-eot	-	metab_5245	B(i)	92.9	0	Lipids	脂质	Fatty Acyls	脂肪酰类	C18	Primary metabolite	map00592;map01110	alpha-Linolenic acid metabolism;Biosynthesis of secondary metabolites	-	M+H	C18H28O3	11.7751	α-亚麻酸代谢;次级代谢产物的生物合成	C16324	pos	-	-	Metabolism;Metabolism	Lipid metabolism;Global and overview maps	-	-	293.21091388599996	0.00364015491902	57.5	-0.709447	-	-	4.88056	4.91199	4.9119	4.85167	4.84538	4.84066	4.781272316540001	4.735554249690001	4.77234
pos_5370	Dehydrocurdione	去氢莪术二酮	metab_5249	B(ii)	0	53.8	Terpenoids	萜类	Sesquiterpenoids	倍半萜	C18	Secondary metabolite	-	-	HMDB0035407	M+H	C15H22O2	11.789283333299998	-	C16949	pos	-	-	-	-	Lipids and lipid-like molecules	Prenol lipids	235.169	0.00481913911509	50	-0.694078	38230-32-9	Sesquiterpenoids	3.71432	3.77795	3.70934	3.7317	3.75941	3.74215	3.82798	3.77613	3.87227
pos_5372	Dihydrocortisol	二氢皮质醇	metab_5251	B(ii)	0	61.2	Steroids and steroid derivatives	甾体及其衍生物	Hydroxysteroids	羟基甾体	C18	Secondary metabolite	-	-	HMDB0003259	M+H	C21H32O5	11.789283333299998	-	C05471	pos	-	-	-	-	Lipids and lipid-like molecules	Steroids and steroid derivatives	365.232	0.007595895657439999	51.4	-0.242888	1482-50-4	Hydroxysteroids	4.54048	4.57088	4.586012913869999	3.43296	3.4077	3.4324336362700003	3.92758	3.90145	3.90498
pos_5375	13-OxoODE	-	metab_5254	B(i)	93	0	Lipids	脂质	Fatty Acyls	脂肪酰类	C18	Primary metabolite	map00591	Linoleic acid metabolism	HMDB0004668;LMFA02000252	M+H	C18H30O3	11.8178	亚油酸代谢	C14765	pos	-	-	Metabolism	Lipid metabolism	Lipids and lipid-like molecules	Fatty Acyls	295.227	0.006060448873169999	57.8	-0.576678	-	Lineolic acids and derivatives	5.423968970519999	5.41913	5.44156	5.62085	5.62037	5.62376	5.36013	5.33884	5.36857
pos_5379	3-(Hydroxymethyl)-7,11,15-trimethylhexadeca-2,6,10-triene-1,14,15-triol	-	metab_5258	B(i)	86	0	Terpenoids	萜类	Diterpenoids	二萜	C18	Secondary metabolite	-	-	-	M+H	C20H36O4	11.832	-	-	pos	-	-	-	-	-	-	341.269	0.00655646629886	50.6	-0.370681	-	-	4.0399909454600005	4.07944	4.119612270069998	4.08984	4.02997	4.05965	4.0321	3.99538	4.01597
pos_5382	Cortolone	皮酮四醇	metab_5261	B(i)	94.4	0	Steroids and steroid derivatives	甾体及其衍生物	Hydroxysteroids	羟基甾体	C18	Secondary metabolite	-	-	HMDB0003128	M+H	C21H34O5	11.8552	-	C05481	pos	-	-	-	-	Lipids and lipid-like molecules	Steroids and steroid derivatives	367.248	0.00407302547474	58	-0.431805	516-42-7	Hydroxysteroids	5.2468077634800006	5.26021	5.28854	4.96631	4.94571	4.97968	4.884296837830001	4.88967	4.89433
pos_5391	11beta,17alpha,21-Trihydroxypregnenolone	-	metab_5270	B(i)	93	0	Steroids and steroid derivatives	甾体及其衍生物	Hydroxysteroids	羟基甾体	C18	Secondary metabolite	-	-	HMDB0006760;LMST02030166	M+H	C21H32O5	11.9674	-	C05489	pos	-	-	-	-	Lipids and lipid-like molecules	Steroids and steroid derivatives	365.232	0.00787351932621	57.8	-0.396842	-	Hydroxysteroids	4.66161	4.68305	4.71578	3.9376133847199983	3.94746	3.9396619178699988	4.1927691837199985	4.259341332719998	4.2431
pos_5395	(1alpha,4beta,5beta)-4-Hydroxy-7(11),10(14)-guaiadien-8-one	（1α，4β，5β）-4-羟基-7（11），10（14）-愈创二烯-8-酮	metab_5274	B(ii)	0	51.3	Terpenoids	萜类	Sesquiterpenoids	倍半萜	C18	Secondary metabolite	-	-	HMDB0036449	M+H	C15H22O2	11.9852	-	-	pos	-	-	-	-	Lipids and lipid-like molecules	Prenol lipids	235.16909007799998	0.0033608914731599994	49.3	-0.710188	-	Sesquiterpenoids	3.82508	3.83846	3.85742	3.89563	3.84103	3.87302	3.81797	3.8586	3.86665
pos_5397	Etherolenic acid	-	metab_5276	B(i)	89.7	0	Lipids	脂质	Fatty Acyls	脂肪酰类	C18	Primary metabolite	map00592	alpha-Linolenic acid metabolism	LMFA10000003	M+H	C18H28O3	11.9852	α-亚麻酸代谢	C16319	pos	-	-	Metabolism	Lipid metabolism	-	-	293.211	0.00396269646967	56.3	-0.657654	-	-	4.69291	4.67067	4.72027	4.68854	4.63979	4.67074	4.50954	4.54244	4.51517
pos_5401	Hexadecanedioic acid	十六烷二酸	metab_5280	B(i)	86.6	0	Lipids	脂质	Fatty Acyls	脂肪酰类	C18	Primary metabolite	map01100;map00073	Metabolic pathways;Cutin, suberine and wax biosynthesis	HMDB0000672;LMFA01170022	M+Na	C16H30O4	11.9993	代谢途径;角质素、软木脂和蜡质生物合成	C19615;C08260	pos	-	-	Metabolism;Metabolism	Global and overview maps;Lipid metabolism	Lipids and lipid-like molecules	Fatty Acyls	309.206	0.00672493481639	54.9	7.51990422509271	505-54-4	Fatty acids and conjugates	3.7565	3.69238	3.7133	3.89346	3.86652	3.89593	3.81175	3.8289	3.77558
pos_5403	Spb(17:0_3o)	-	metab_5282	B(i)	49.3	0	Others	其他类	Others	其他类	C18	Others	-	-	-	M+H	C17H37NO3	12.0243	-	-	pos	-	-	-	-	-	-	304.284	0.0032059370311	49	-0.632676	-	-	4.08855	4.04516	4.0884001130500005	4.96863	4.944501186569999	4.95417	5.10233	5.12415	5.12447
pos_5407	9-Peroxy-5,6E-dehydro-6,7-dihydrogeranyl acetate	-	metab_5286	B(i)	79.9	0	Lipids	脂质	Fatty Acyls	脂肪酰类	C18	Primary metabolite	-	-	-	M+H	C12H20O4	12.038533333299998	-	-	pos	-	-	-	-	-	-	229.14336869099998	0.0035247433122699997	55.5	-0.293073	-	-	4.81718	4.81248	4.84214	4.22744	4.2185625359099985	4.22575	4.06035	4.09265	4.04057
pos_5421	Linoleic acid	亚油酸	metab_5300	B(i)	83.5	0	Lipids	脂质	Fatty Acyls	脂肪酰类	C18	Primary metabolite	map01100;map00591;map01040	Metabolic pathways;Linoleic acid metabolism;Biosynthesis of unsaturated fatty acids	HMDB0000673;LMFA01030120;PW_C000530	M+NH4	C18H32O2	12.1063	代谢途径;亚油酸代谢;不饱和脂肪酸的生物合成	C01595	pos	Lipids	Fatty acids	Metabolism;Metabolism;Metabolism	Global and overview maps;Lipid metabolism;Lipid metabolism	Lipids and lipid-like molecules	Fatty Acyls	298.27389545200003	0.00616716555383	55.9	-0.572164	60-33-3	Lineolic acids and derivatives	4.058809811880002	4.07624	4.0849	4.34224	4.31496	4.35222	4.41917	4.476406620490001	4.42316
pos_5438	Halisphingosine A	-	metab_5317	B(i)	97.9	0	Others	其他类	Amines and derivatives	胺类及其衍生物	C18	Others	-	-	-	M+H	C18H37NO3	12.2237	-	-	pos	-	-	-	-	-	-	316.28442016599996	0.0023548347168699997	58.7	-0.635364	-	-	4.80928	4.86733	4.83101	5.105753106540001	5.08873	5.10491	5.32224	5.3521153130400005	5.33225
pos_5439	1-Acetoxy-2-hydroxy-16-heptadecen-4-one	1 -乙酰氧基- 2 -羟基- 16 -庚二烯- 4 -酮	metab_5318	B(ii)	0	54.5	Lipids	脂质	Fatty Acyls	脂肪酰类	C18	Primary metabolite	-	-	HMDB0031006	M+NH4	C19H34O4	12.2237	-	-	pos	-	-	-	-	Lipids and lipid-like molecules	Fatty Acyls	344.279	0.0011267429836300002	49.7	-0.876177	25346-18-3	Fatty alcohols	3.85425	3.85155	3.87669	4.24911	4.21503	4.24397	4.0591696540400015	4.0491	4.03142
pos_5444	Alpha-Humulene	-	metab_5323	B(ii)	0	63.7	Terpenoids	萜类	Sesquiterpenoids	倍半萜	C18	Secondary metabolite	map00909	Sesquiterpenoid and triterpenoid biosynthesis	HMDB0036467	M+NH4	C15H24	12.246483333299999	倍半萜和三萜生物合成	C09684	pos	-	-	Metabolism	Metabolism of terpenoids and polyketides	Lipids and lipid-like molecules	Prenol lipids	222.221	0.007416306946460001	52.2	-0.99205	6753-98-6	Sesquiterpenoids	1.52445	1.5287927444799998	1.5379596190399998	1.63059	1.61892	1.6252497440399998	1.94415	2.40743	2.29822
pos_5453	Alpha-Methylstyrene	-	metab_5332	B(i)	93.1	0	Others	其他类	Others	其他类	C18	Others	-	-	HMDB0059899	M+H	C9H10	12.2692	-	C14395	pos	-	-	-	-	Benzenoids	Benzene and substituted derivatives	119.086	0.00048130544248400003	58.1	1.74237920225471	98-83-9	Phenylpropenes	4.8096546381400005	4.81431	4.83248	4.75088	4.7319238846900005	4.74377	4.89198	4.9129	4.91583
pos_5454	Chavicol	4-烯丙基苯酚	metab_5333	B(i)	93.7	0	Others	其他类	Others	其他类	C18	Others	map00940;map01110	Phenylpropanoid biosynthesis;Biosynthesis of secondary metabolites	HMDB0034107	M+H	C9H10O	12.2692	苯丙烷生物合成;次级代谢产物的生物合成	C16930	pos	-	-	Metabolism;Metabolism	Biosynthesis of other secondary metabolites;Global and overview maps	Benzenoids	Phenols	135.081	0.000532902557131	58.2	0.45938756990843105	501-92-8	1-hydroxy-2-unsubstituted benzenoids	4.2364809385400015	4.23719	4.25553	4.19219	4.17918	4.18747	4.33754	4.35717	4.35825
pos_5469	Alpha-Linolenoyl Ethanolamide	α -亚油酰乙醇胺	metab_5348	B(i)	95	0	Others	其他类	Amines and derivatives	胺类及其衍生物	C18	Others	-	-	HMDB0013624	M+H	C20H35NO2	12.292	-	C13828	pos	-	-	-	-	Organic nitrogen compounds	Organonitrogen compounds	322.274	0.000612945299554	58.2	-0.570084	-	Amines	4.65115	4.64388	4.66377	5.053877922190001	5.03601	5.0412	4.28657	4.32275	4.319062927869999
pos_5471	13(S)-HpOTrE	13（S）-HpOTrE	metab_5350	B(i)	94.7	0	Lipids	脂质	Fatty Acyls	脂肪酰类	C18	Primary metabolite	map01100;map00592;map01110	Metabolic pathways;alpha-Linolenic acid metabolism;Biosynthesis of secondary metabolites	HMDB0301803	M+H	C18H30O4	12.3148	代谢途径;α-亚麻酸代谢;次级代谢产物的生物合成	C04785	pos	-	-	Metabolism;Metabolism;Metabolism	Global and overview maps;Lipid metabolism;Global and overview maps	Lipids and lipid-like molecules	Fatty Acyls	311.221	0.0009080551523029999	58.1	-0.654701	67597-26-6	Lineolic acids and derivatives	4.52325	4.50895	4.52717	4.57121	4.53964	4.57732	4.5125	4.52618	4.49344
pos_5473	(R)-2-Hydroxysterculic acid	（R） -2-羟基甾酸	metab_5352	B(ii)	0	69.5	Lipids	脂质	Fatty Acyls	脂肪酰类	C18	Primary metabolite	-	-	HMDB0031060	M+	C19H34O3	12.3378	-	-	pos	-	-	-	-	Lipids and lipid-like molecules	Fatty Acyls	310.253	0.00239427827267	51.6	5.733077164537249	14602-38-1	Fatty alcohols	2.77431	2.59259	2.81307	2.7946175285000003	2.6832758019400003	2.72163	2.97961	3.08249	3.02377
pos_5474	4-Hydroxyretinoic acid	4 -羟基维甲酸	metab_5353	B(ii)	0	69.2	Vitamins	维生素类	Vitamins	维生素类	C18	Primary metabolite	map01100	Metabolic pathways	HMDB0006254	M+CH3OH+H	C20H28O3	12.3378	代谢途径	C16677	pos	-	-	Metabolism	Global and overview maps	Lipids and lipid-like molecules	Prenol lipids	349.237	0.0058682213316199995	53.1	-0.847072	66592-72-1	Retinoids	3.32702	3.46132	3.29124	2.89926	2.54521	2.96284	3.05992	2.95798	2.94943
pos_5477	1-Hydroxyepiacorone	1 -羟基淫羊藿酮	metab_5356	B(ii)	0	46.3	Others	其他类	Others	其他类	C18	Others	-	-	HMDB0030918	M+H-H2O	C15H24O3	12.3608	-	-	pos	-	-	-	-	Organic oxygen compounds	Organooxygen compounds	235.16914097400002	0.00526171878757	47.7	-0.457641	185154-96-5	Carbonyl compounds	3.42008	3.38412	3.39369	3.3168	3.3227149007200003	3.3099	3.48279	3.51114	3.3997973822000005
pos_5478	(+)-Lepadin D	-	metab_5357	B(i)	96.8	0	Others	其他类	Others	其他类	C18	Others	-	-	-	M+H	C18H35NO2	12.3608	-	-	pos	-	-	-	-	-	-	298.274	0.00113558869646	58.6	-0.633129	-	-	4.29559	4.26322	4.295169776530002	4.65332	4.62791	4.683264969290001	4.9365	4.95164	4.92155
pos_5487	(2S,4R)-p-Mentha-1(7),5-dien-2-ol	（2S，4R）-对薄荷-1（7），5-二烯-2-醇	metab_5366	B(ii)	0	44.5	Terpenoids	萜类	Monoterpenoids	单萜	C18	Secondary metabolite	-	-	HMDB0035277	M+H-H2O	C10H16O	12.4068	-	-	pos	-	-	-	-	Lipids and lipid-like molecules	Prenol lipids	135.117	0.0015876526272999999	48.2	0.20597971470164703	29332-98-7	Monoterpenoids	3.71059	3.72295	3.76608	3.78787	3.771959883430001	3.79611	3.6695	3.701	3.6712
pos_5488	3-Hydroxy-5Z-octenyl acetate	3 -羟基- 5Z -辛烯基乙酸酯	metab_5367	B(ii)	0	43.2	Lipids	脂质	Fatty Acyls	脂肪酰类	C18	Primary metabolite	-	-	HMDB0030369	M+H-2H2O	C10H18O3	12.4068	-	-	pos	-	-	-	-	Lipids and lipid-like molecules	Fatty Acyls	151.112	0.00559550880996	48	-0.293363	-	Fatty alcohol esters	3.5864	3.57405	3.60492	3.65081	3.6647	3.68671	3.61409	3.69169	3.6348
pos_5491	Cuminyl acetate	-	metab_5370	B(i)	79.5	0	Terpenoids	萜类	Monoterpenoids	单萜	C18	Secondary metabolite	-	-	-	M+H	C12H16O2	12.4068	-	-	pos	-	-	-	-	-	-	193.12234470200002	0.0006548295912220001	55.4	0.20049250597280896	-	-	3.9815	3.97534	3.99423	3.96284	3.94783	3.95491	3.73724	3.7878	3.73118
pos_5495	Sclareolide	香紫苏内酯	metab_5374	B(i)	63.6	0	Others	其他类	Others	其他类	C18	Others	-	-	HMDB0035293	M+H	C16H26O2	12.4068	-	-	pos	-	-	-	-	Organoheterocyclic compounds	Naphthofurans	251.2	0.00123843478599	51.9	-0.956121	564-20-5	Not Available	3.5841929365800005	3.5651	3.63154	3.79769	3.78407	3.83524	3.64919	3.73359	3.68278
pos_5496	14,15-Dehydrocrepenynic acid	-	metab_5375	B(i)	59.5	0	Lipids	脂质	Fatty Acyls	脂肪酰类	C18	Primary metabolite	-	-	LMFA01031062	M+H	C18H28O2	12.4068	-	-	pos	-	-	-	-	-	-	277.216	0.000551555591762	51.2	-0.457128	-	-	5.24794	5.25875	5.27581	5.48003	5.47405	5.4773501195800005	5.14427	5.182529068419999	5.17558
pos_5507	9,10-dhome	-	metab_5385	B(i)	89	0	Lipids	脂质	Fatty Acyls	脂肪酰类	C18	Primary metabolite	map00591	Linoleic acid metabolism	HMDB0004704	M+H	C18H34O4	12.429716666700001	亚油酸代谢	C14828	pos	-	-	Metabolism	Lipid metabolism	Lipids and lipid-like molecules	Fatty Acyls	315.253	0.00605681394483	56.8	-0.808841	125356-86-7	Fatty acids and conjugates	2.1616505007700004	2.43429	2.21874	2.78918	2.60316	2.7475078465400005	3.17214	3.17478	3.21079
pos_5511	Capsiamide	盖帽剂	metab_5389	B(ii)	0	73.3	Organic acids and derivatives	有机酸及其衍生物	Organic acids and derivatives	有机酸及其衍生物	C18	Secondary metabolite	-	-	HMDB0040940	M+CH3OH+H	C17H35NO	12.4526	-	C17515	pos	-	-	-	-	Organic acids and derivatives	Carboxylic acids and derivatives	302.305	0.00105374328843	53.9	-1.04229	64317-66-4	Carboxylic acid derivatives	4.68709	4.700553830990001	4.716950150390001	4.70592	4.681658125219999	4.7447823622600005	4.87994	4.9385	4.93555
pos_5514	Ineketone	艾耐壳酮	metab_5392	B(ii)	0	49.8	Terpenoids	萜类	Diterpenoids	二萜	C18	Secondary metabolite	-	-	HMDB0036698	M+CH3OH+H	C20H30O3	12.4757	-	C09110	pos	-	-	-	-	Lipids and lipid-like molecules	Prenol lipids	351.25277846800003	0.0015627816724800001	49.2	-0.652167	62574-18-9	Diterpenoids	6.13442	6.14128	6.16011	5.80444	5.78901	5.818368153250001	5.61272	5.6468	5.60067
pos_5522	Lys-Leu-His	-	metab_5399	B(i)	37.9	0	Others	其他类	Others	其他类	C18	Others	-	-	-	M+H-H2O	C18H32N6O4	12.4988	-	-	pos	-	-	-	-	-	-	379.245	0.00264592505414	46.8	0.47477960046445505	-	-	2.60221	2.74374	2.62682	2.74645	2.70377	2.6296913558200004	2.67298	2.5524	2.60268
pos_5527	Alpha-Linolenic Acid	-	metab_5404	B(i)	72.4	0	Lipids	脂质	Fatty Acyls	脂肪酰类	C18	Primary metabolite	map01100;map00592;map01110;map01040	Metabolic pathways;alpha-Linolenic acid metabolism;Biosynthesis of secondary metabolites;Biosynthesis of unsaturated fatty acids	HMDB0001388;LMFA01030152;PW_C001073	M+H	C18H30O2	12.5201	代谢途径;α-亚麻酸代谢;次级代谢产物的生物合成;不饱和脂肪酸的生物合成	C06427	pos	Lipids	Fatty acids	Metabolism;Metabolism;Metabolism;Metabolism	Global and overview maps;Lipid metabolism;Global and overview maps;Lipid metabolism	Lipids and lipid-like molecules	Fatty Acyls	279.23170910700003	0.000615023359783	53.8	-0.530242	463-40-1	Lineolic acids and derivatives	4.75905	4.74965	4.77042	5.0662	5.03663	5.0254	4.7567	4.75105	4.77144
pos_5533	Hormodirene	-	metab_5410	B(i)	93.8	0	Others	其他类	Hydrocarbons and derivatives	烃类及其衍生物	C18	Others	-	-	-	M+H	C11H16	12.543083333299998	-	-	pos	-	-	-	-	-	-	149.132	0.00039666409783199996	58.5	-0.0218528	-	-	4.20531	4.2059	4.22215	4.38177	4.37332	4.36743	4.06408	4.11788	4.09467
pos_5534	Alpha-Terpineol propanoate	-	metab_5411	B(ii)	0	60	Terpenoids	萜类	Monoterpenoids	单萜	C18	Secondary metabolite	-	-	HMDB0032052	M+NH4	C13H22O2	12.543083333299998	-	-	pos	-	-	-	-	Lipids and lipid-like molecules	Prenol lipids	228.196	0.00140122938499	51.3	-0.496127	80-27-3	Monoterpenoids	4.89491	4.90242	4.91175	5.02661	5.02284	5.02655	5.176661842790001	5.18761	5.19179
pos_5537	3-ketosphinganine	3 -酮基苯丙氨酸	metab_5414	B(i)	82.3	0	Others	其他类	Ketones and derivatives	酮类及其衍生物	C18	Others	map00600;map01100	Sphingolipid metabolism;Metabolic pathways	HMDB0001480;LMSP01020002	M+H	C18H37NO2	12.543083333299998	鞘脂代谢;代谢途径	C02934	pos	-	-	Metabolism;Metabolism	Lipid metabolism;Global and overview maps	Organic oxygen compounds	Organooxygen compounds	300.29	0.00152309783473	55.6	-0.536145	16105-69-4	Carbonyl compounds	3.73201	3.72527	3.73731	4.18975	4.1214	4.1207	4.31824	4.3364571105400005	4.3110823051599985
pos_5539	Urocortisol	-	metab_5416	B(i)	86	0	Steroids and steroid derivatives	甾体及其衍生物	Hydroxysteroids	羟基甾体	C18	Secondary metabolite	-	-	-	M+H	C21H34O5	12.543083333299998	-	C05472	pos	-	-	-	-	-	-	367.248	0.0013404009978599998	56.3	-0.541168	1953-02-01	-	5.80753	5.824643899650002	5.84338	5.19521	5.17287	5.20358	5.368546278169999	5.4058730412000005	5.37112
pos_5544	Oryzalexin E	水稻二萜植保素	metab_5421	B(ii)	0	58.7	Others	其他类	Phenanthrenes and derivatives	菲及其衍生物	C18	Others	map00904;map01110	Diterpenoid biosynthesis;Biosynthesis of secondary metabolites	HMDB0039702	M+NH4	C20H32O2	12.566066666700001	二萜生物合成;次级代谢产物的生物合成	C21561	pos	-	-	Metabolism;Metabolism	Metabolism of terpenoids and polyketides;Global and overview maps	Benzenoids	Phenanthrenes and derivatives	322.274	0.00045479891138799997	50.8	-1.04766	150943-96-7	Hydrophenanthrenes	4.04234	4.04695	4.06526	4.3180925497199985	4.28036	4.25402	3.52201	3.5383716358599995	3.4401472473300005
pos_5547	4Z,7Z,10Z,13Z-hexadecatetraenoic acid	-	metab_5424	B(i)	85.1	0	Lipids	脂质	Fatty Acyls	脂肪酰类	C18	Primary metabolite	-	-	LMFA01030163	M+H	C16H24O2	12.5891	-	-	pos	-	-	-	-	-	-	249.185	0.00103924805424	55.8	-0.597144	-	-	3.77347	3.78482	3.87366	3.88993	3.968643873630001	3.88218	4.07011	4.13577	4.09461
pos_5548	[6]-Shogaol	[ 6 ] - -生姜酚	metab_5425	B(i)	90.4	0	Others	其他类	Others	其他类	C18	Others	-	-	HMDB0031463	M+H	C17H24O3	12.5891	-	C10494	pos	-	-	-	-	Benzenoids	Phenols	277.18	0.000598649053842	57.5	-0.181764	555-66-8	Methoxyphenols	3.47504	3.49378	3.5109	3.85484	3.89353	3.97567	4.185190165930002	4.20299	4.21591
pos_5549	16-B1-phytoprostane	-	metab_5426	B(ii)	0	91.3	Lipids	脂质	Fatty Acyls	脂肪酰类	C18	Primary metabolite	-	-	HMDB0304634	M+H-H2O	C18H28O4	12.5891	-	-	pos	-	-	-	-	Lipids and lipid-like molecules	Fatty Acyls	291.195	0.0005779180990399999	57.5	-0.256301	-	Eicosanoids	4.87633	4.895902170569999	4.920192409519999	4.57931	4.57542	4.57856	4.86101	4.859	4.82327
pos_5551	21-hydroxypregnenolone	21 -羟基孕烯醇酮	metab_5428	B(i)	56.5	0	Steroids and steroid derivatives	甾体及其衍生物	Hydroxysteroids	羟基甾体	C18	Secondary metabolite	-	-	HMDB0004026;LMST02030167;PW_C002027	M+H	C21H32O3	12.5891	-	C05485	pos	-	-	-	-	Lipids and lipid-like molecules	Steroids and steroid derivatives	333.242	0.00136606183755	50.4	-0.756898	1164-98-3	Hydroxysteroids	3.37747	3.31682	3.4753892371199995	3.13775	2.9003991201700003	3.14142	3.167	3.17251	3.11479
pos_5558	3-hydroxylauroylcarnitine	-	metab_5435	B(i)	51.6	0	Lipids	脂质	Fatty Acyls	脂肪酰类	C18	Primary metabolite	-	-	HMDB0061638	M+H-2H2O	C19H37NO5	12.6118	-	-	pos	-	-	-	-	Lipids and lipid-like molecules	Fatty Acyls	324.253	0.00180959431379	49.1	-0.718701	-	Fatty acid esters	3.75061	3.79333	3.74816	3.70687	3.71912	3.698	3.70576	3.82868	3.76277
pos_5564	Acetylphosphate	乙酰磷酸	metab_5441	B(i)	37.6	0	Organic acids and derivatives	有机酸及其衍生物	Organic acids and derivatives	有机酸及其衍生物	C18	Secondary metabolite	map01100;map01200;map00620;map00430	Metabolic pathways;Carbon metabolism;Pyruvate metabolism;Taurine and hypotaurine metabolism	HMDB0001494;PW_C001151	M+	C2H5O5P	12.6348	代谢途径;碳代谢;丙酮酸代谢;牛磺酸和亚牛磺酸代谢	C00227	pos	-	-	Metabolism;Metabolism;Metabolism;Metabolism	Global and overview maps;Global and overview maps;Carbohydrate metabolism;Metabolism of other amino acids	Organic acids and derivatives	Organic phosphoric acids and derivatives	139.988	0.00154972752134	46.2	2.85986059431136	590-54-5	Phosphate esters	4.3861030774400005	4.39755	4.41645	4.45906	4.48635	4.435275277290001	4.64574	4.6351431429100005	4.68772
pos_5565	Anandamide	花生四烯酰乙醇胺	metab_5442	B(ii)	0	62.9	Others	其他类	Amines and derivatives	胺类及其衍生物	C18	Others	-	-	HMDB0004080	M+H-2H2O	C22H37NO2	12.6348	-	C11695	pos	-	-	-	-	Organic nitrogen compounds	Organonitrogen compounds	312.26821433599997	0.00344219462386	50.1	-1.04282	94421-68-8	Amines	3.65866	3.6561100228699988	3.63396	3.79599	3.89152	3.84704	3.8887763296300006	3.95227	4.06063
pos_5578	Tetranor-12R-HETE	-	metab_5455	B(i)	92.5	0	Lipids	脂质	Fatty Acyls	脂肪酰类	C18	Primary metabolite	-	-	LMFA01050143	M+H	C16H26O3	12.680933333299999	-	-	pos	-	-	-	-	-	-	267.195	0.00209410893679	57.5	-0.726862	-	-	3.17588	3.12174	3.12571	3.1889615201700003	3.28038	3.19888	3.38921	3.3340016123100003	3.38112
pos_5579	1-18:3-lysoPC	-	metab_5456	B(i)	84.1	0	Lipids	脂质	Glycerophospholipids	甘油磷脂类	C18	Primary metabolite	-	-	HMDB0010388	M+H	C26H48NO7P	12.680933333299999	-	-	pos	-	-	-	-	Lipids and lipid-like molecules	Glycerophospholipids	518.324	0.00454657051466	56.5	0.265903658925498	-	Glycerophosphocholines	4.10142	4.0953	4.12218	3.00991	3.10572	3.29745	4.09143	4.1573	4.1351658566400005
pos_5583	Lyratal	-	metab_5460	B(i)	91.5	0	Others	其他类	Aldehydes and derivatives	醛类及其衍生物	C18	Others	-	-	-	M+H	C10H14O	12.7037	-	-	pos	-	-	-	-	-	-	151.112	0.0008029378942789999	58	-0.084307	-	-	4.00631	4.02986	4.03101	3.88963	3.90289	3.91747	3.90317	3.8909	3.91026
pos_5589	Dihydroalbocycline	二氢阿博霉素	metab_5466	B(i)	87.1	0	Others	其他类	Macrolides and derivatives	大环内酯类及其衍生物	C18	Others	-	-	-	M+H	C18H30O4	12.7037	-	C15753	pos	-	-	-	-	-	-	311.221	0.00136342253715	56.5	-0.728213	67003-69-4	-	4.59704	4.62835	4.62314	4.57443	4.56286	4.60199	4.3947	4.3868431049000005	4.40297
pos_5592	9,10-Dihydroxystearic acid	9,10-二羟基硬脂酸	metab_5469	B(ii)	0	71.7	Lipids	脂质	Fatty Acyls	脂肪酰类	C18	Primary metabolite	map00073	Cutin, suberine and wax biosynthesis	HMDB0302281	M+Na	C18H36O4	12.7037	角质素、软木脂和蜡质生物合成	C08314;C19622	pos	-	-	Metabolism	Lipid metabolism	Lipids and lipid-like molecules	Fatty Acyls	339.253	0.00113567383556	49	6.88183429829777	120-87-6	Fatty acids and conjugates	3.81847	3.87409	3.85335	3.68699	3.620327847340001	3.66085	3.78897	3.78104	3.85834
pos_5618	Trp-Ile-His	-	metab_5495	B(i)	50.4	0	Amino acids and derivatives	氨基酸及其衍生物	Other peptides	其他肽	C18	Primary metabolite	-	-	-	M+H	C23H30N6O4	12.749816666700001	-	-	pos	-	-	-	-	-	-	455.24	0.00276102719115	49.4	0.41693665095201	-	-	4.40763	4.37513	4.427440746559999	3.00872	2.9799179234900004	3.16014	3.10824	3.16477	3.12243
pos_5624	Crocinervolide	-	metab_5501	B(i)	49.6	0	Others	其他类	Lactones	内酯类	C18	Others	-	-	-	M+H	C12H18O3	12.7723	-	-	pos	-	-	-	-	-	-	211.133	0.0032387030080700003	48.5	-0.313282	-	-	4.0670064660400005	4.07249	4.09377	4.00957	4.004796419080002	4.06262	3.7902843703800007	3.83048	3.82423
pos_5628	Methyl haplodesertoate	-	metab_5505	B(i)	85.7	0	Terpenoids	萜类	Sesquiterpenoids	倍半萜	C18	Secondary metabolite	-	-	-	M+H	C19H30O3	12.7723	-	-	pos	-	-	-	-	-	-	307.227	0.006924978379640001	56.5	-0.718232	-	-	3.99909	3.93759	3.98135	3.3116489771599995	3.2757	3.37579	3.4436067746800005	3.38409	3.47292
pos_5629	O-[(5Z)-dodecenoyl]carnitine	-	metab_5506	B(i)	62.9	0	Lipids	脂质	Fatty Acyls	脂肪酰类	C18	Primary metabolite	-	-	-	M+H	C19H35NO4	12.7723	-	-	pos	-	-	-	-	-	-	342.264	0.0035821788999899993	51.6	-0.659813	-	-	3.97947	3.9852	4.0168	3.61219	3.53655	3.64791	3.56385	3.5674012152699994	3.68653
pos_5635	9,10-Seco-8,10(20),13-labdatriene-3,11,15-triol	-	metab_5511	B(i)	54.4	0	Vitamins	维生素类	Vitamins	维生素类	C18	Primary metabolite	-	-	-	M+H	C20H34O3	12.795283333299999	-	-	pos	-	-	-	-	-	-	323.258	0.00201372230226	50.1	-0.704406	-	-	3.4427443640800006	3.39122	3.42879	3.36165	3.32312	3.46255	3.69542	3.69312	3.73426
pos_5647	Flavidulol C	黄酮C	metab_5523	B(ii)	0	45	Others	其他类	Phenol ethers	酚醚类	C18	Others	-	-	HMDB0039150	M+ACN+H	C34H42O4	12.8166	-	-	pos	-	-	-	-	Benzenoids	Phenol ethers	556.34	0.00490461887555	46.9	-4.47733	117568-34-0	Anisoles	2.33016	1.3658364980000002	1.972	1.6120334295299998	1.4975781417700005	1.99921	2.60042	2.83329	2.72076
pos_5651	5-(1-oxopropan-2-yl)isolongifol-5-ene	-	metab_5527	B(i)	94	0	Terpenoids	萜类	Sesquiterpenoids	倍半萜	C18	Secondary metabolite	-	-	LMPR0103500011	M+H	C18H28O	12.8397	-	-	pos	-	-	-	-	-	-	261.221	0.0021805335934499998	58.2	-0.325697	-	-	5.52918	5.523404376469999	5.52958	5.44546	5.40338	5.47332	5.03485	5.03809	5.04888
pos_5678	Dihydro-5-pentyl-2(3H)-furanone	-	metab_5554	B(ii)	0	40.2	Others	其他类	Lactones	内酯类	C18	Others	-	-	HMDB0031531	M+H-2H2O	C9H16O2	12.8947	-	C08501	pos	-	-	-	-	Organoheterocyclic compounds	Lactones	121.101	0.00229116	46.4	0.969171183568708	104-61-0;57084-16-9	Gamma butyrolactones	3.56452	3.62908	3.58599	3.50492	3.39678	3.49353	3.44465	3.41374	3.399
pos_5681	11,12,13-Trinor-6,9-eremophiladien-8-one	-	metab_5557	B(i)	89.2	0	Others	其他类	Ketones and derivatives	酮类及其衍生物	C18	Others	-	-	-	M+H	C12H16O	12.8947	-	-	pos	-	-	-	-	-	-	177.12736967200001	0.0009264020729649999	57.5	-0.124306	-	-	4.5554	4.58333	4.5421	4.13266	4.11807	4.17531	3.79786	3.83807	3.8035
pos_5682	(Z)-3-Hexenyl beta-D-glucopyranoside	-	metab_5558	B(i)	46.5	0	Lipids	脂质	Fatty Acyls	脂肪酰类	C18	Primary metabolite	-	-	-	M+H-2H2O	C12H22O6	12.8947	-	-	pos	-	-	-	-	-	-	227.128	0.00199304038521	48.4	-0.668862	-	-	4.19994	4.23152	4.1713151142100005	3.76382	3.7192	3.8372677990400006	3.50399	3.4890847020699995	3.4821204790300007
pos_5685	Coniferonic acid	-	metab_5561	B(i)	86.5	0	Lipids	脂质	Fatty Acyls	脂肪酰类	C18	Primary metabolite	-	-	LMFA01030355	M+H	C18H28O2	12.8947	-	-	pos	-	-	-	-	-	-	277.216	0.000693541371125	56.6	-0.709517	-	-	5.60113	5.617702486640002	5.58323	5.41373	5.40584	5.47437	5.199807257330001	5.18129	5.19753
pos_5687	Ent-7-oxo-8(14),15-pimaradien-19-oic acid	-	metab_5563	B(i)	83.9	0	Terpenoids	萜类	Diterpenoids	二萜	C18	Secondary metabolite	-	-	HMDB0036747	M+H	C20H28O3	12.8947	-	-	pos	-	-	-	-	Lipids and lipid-like molecules	Prenol lipids	317.209	0.004161369953869999	54	-8.07907	23807-90-1	Diterpenoids	3.27955	3.25898	3.3493961643700003	3.54447	3.65412	3.69067	3.61549	3.61554	3.6381
pos_5690	Tetrahydrocorticosterone	四氢皮质酮	metab_5566	B(i)	83.3	0	Steroids and steroid derivatives	甾体及其衍生物	Hydroxysteroids	羟基甾体	C18	Secondary metabolite	-	-	HMDB0000268;LMST02030100;PW_C000183	M+H	C21H34O4	12.8947	-	C05476	pos	-	-	-	-	Lipids and lipid-like molecules	Steroids and steroid derivatives	351.253	0.0008734715222619999	55.9	-0.490058	68-42-8	Hydroxysteroids	6.47785	6.4793	6.464977950830001	5.89301	5.87595	5.937220378509999	5.6821011743300005	5.69731	5.68667
pos_5703	Traumatic Acid	愈伤酸	metab_5579	B(i)	78.6	0	Lipids	脂质	Fatty Acyls	脂肪酰类	C18	Primary metabolite	map00592;map01110	alpha-Linolenic acid metabolism;Biosynthesis of secondary metabolites	HMDB0000933;LMFA01170002	M+H-H2O	C12H20O4	12.939	α-亚麻酸代谢;次级代谢产物的生物合成	C16308	pos	-	-	Metabolism;Metabolism	Lipid metabolism;Global and overview maps	Lipids and lipid-like molecules	Fatty Acyls	211.13274599599998	0.00200377	55.1	-0.547366	6402-36-4	Fatty acids and conjugates	3.67167	3.72433	3.72673	3.65927	3.5819	3.69057	3.53554	3.53792	3.55103
pos_5704	(9Z,11E,13E,15Z)-4-Oxo-9,11,13,15-octadecatetraenoic acid	（9Z，11E，13E，15Z）-4-氧代-9,11,13,15-十八碳四烯酸	metab_5580	B(ii)	0	52.8	Lipids	脂质	Fatty Acyls	脂肪酰类	C18	Primary metabolite	-	-	HMDB0031098	M+H	C18H26O3	12.939	-	-	pos	-	-	-	-	Lipids and lipid-like molecules	Fatty Acyls	291.195	0.00142262087639	49.7	-0.669578	17699-21-7	Lineolic acids and derivatives	4.32451	4.33671	4.32512	3.95329	3.91741	4.01075	4.17841	4.120299727819998	4.15232
pos_5708	2-glyceryl-11,12-EET	-	metab_5584	B(i)	80.7	0	Lipids	脂质	Fatty Acyls	脂肪酰类	C18	Primary metabolite	-	-	HMDB0260514	M+H	C23H38O5	12.939	-	-	pos	-	-	-	-	Lipids and lipid-like molecules	Fatty Acyls	395.27899795699994	0.00117214123976	55.2	-0.514343	-	Eicosanoids	4.74605	4.74468	4.7723489930000005	4.7137643786400005	4.66185	4.72775	4.77435	4.76944	4.8452727835100005
pos_5710	Arg-Phe-Ile	-	metab_5586	B(i)	97.6	0	Others	其他类	Others	其他类	C18	Others	-	-	-	M+H	C21H34N6O4	12.939	-	-	pos	-	-	-	-	-	-	435.272	0.0023593425452199997	58.7	1.35938298879645	-	-	4.223720483319998	4.22246	4.23386	4.1556216085800015	4.1053652118400015	4.1604752945199985	4.25406	4.2609	4.26679
pos_5716	Kobusimin B	-	metab_5592	B(i)	46.5	0	Terpenoids	萜类	Sesquiterpenoids	倍半萜	C18	Secondary metabolite	-	-	-	M+H	C15H24O4	12.9619	-	-	pos	-	-	-	-	-	-	269.175	0.000869886218494	48.7	-0.449929	-	-	6.305964492719999	6.30662	6.286258628790001	5.859702539830001	5.83826	5.888802634909999	5.40223	5.38981	5.39311
pos_5718	Icosasphinganine	-	metab_5594	B(i)	94.6	0	Others	其他类	Amines and derivatives	胺类及其衍生物	C18	Others	-	-	-	M+H	C20H43NO2	12.9619	-	-	pos	-	-	-	-	-	-	330.336	0.000433386100393	58	-0.695401	-	-	4.89678	4.9296	4.93193	4.92544	4.89145	4.90206	4.99876	5.06309	5.008415343999999
pos_5721	11,12,15-theta	-	metab_5597	B(ii)	0	88.9	Lipids	脂质	Fatty Acyls	脂肪酰类	C18	Primary metabolite	map00590;map01100	Arachidonic acid metabolism;Metabolic pathways	HMDB0004684	M+CH3OH+Na	C20H34O5	12.9619	花生四烯酸代谢;代谢途径	C14782	pos	-	-	Metabolism;Metabolism	Lipid metabolism;Global and overview maps	Lipids and lipid-like molecules	Fatty Acyls	409.256	0.000654585069165	57.1	-0.229389	-	Eicosanoids	5.92249	5.92727	5.90943	5.59323	5.55526	5.60351	5.15587	5.167157527480001	5.17211
pos_5737	Menthofuran	-	metab_5613	B(i)	77.7	0	Terpenoids	萜类	Monoterpenoids	单萜	C18	Secondary metabolite	map01110;map00902	Biosynthesis of secondary metabolites;Monoterpenoid biosynthesis	HMDB0036089;LMPR0102090020	M+H-H2O	C10H14O	13.007933333299999	次级代谢产物的生物合成;单萜生物合成	C09868;C18025	pos	-	-	Metabolism;Metabolism	Global and overview maps;Metabolism of terpenoids and polyketides	Lipids and lipid-like molecules	Prenol lipids	133.10124884799998	0.0019388498402899998	54.7	0.47985979395899797	494-90-6	Monoterpenoids	4.39738	4.401333770919999	4.421501867819999	4.34036	4.34542	4.37408	4.35738	4.404378321769999	4.34894
pos_5738	(6E)-8-Oxogeraniol	-	metab_5614	B(i)	65.3	0	Terpenoids	萜类	Monoterpenoids	单萜	C18	Secondary metabolite	-	-	-	M+H	C10H16O2	13.007933333299999	-	C20223	pos	-	-	-	-	-	-	169.122	0.0016045801696199999	52	-0.283404	-	-	3.90172	3.86874	3.90291	3.7781	3.75317	3.80742	3.78862	3.81172	3.78552
pos_5748	Cer(8:1_2O/18:4)	-	metab_5624	B(i)	35.1	0	Others	其他类	Others	其他类	C18	Others	-	-	-	M+H	C26H43NO3	13.007933333299999	-	-	pos	-	-	-	-	-	-	418.331	0.0018516987912500001	45.5	-0.745933	-	-	3.59284	3.67147	3.6098	3.74364	3.5781612496699995	3.61298	3.648707592880001	3.67209	3.63785
pos_5755	Putaminoxin E	-	metab_5631	B(i)	73.3	0	Others	其他类	Lactones	内酯类	C18	Others	-	-	-	M+H-2H2O	C12H22O3	13.0304	-	-	pos	-	-	-	-	-	-	179.143	0.00230550967815	54.1	-0.184102	-	-	4.5003	4.50742	4.49009	4.16675	4.130336015859998	4.15986	4.03705	4.03898	4.00449
pos_5759	3-Deoxyestradiol	-	metab_5635	B(i)	87.6	0	Steroids and steroid derivatives	甾体及其衍生物	Estrane steroids	雌甾烷	C18	Secondary metabolite	-	-	-	M+H	C18H24O	13.0304	-	C14239	pos	-	-	-	-	-	-	257.19	0.00108618165285	56.6	-0.740752	2529-64-8	-	4.22996	4.23581	4.24616	4.02137	4.0077743443900005	4.06597	4.01561	4.01229	3.986727277930001
pos_5760	Dicranin	-	metab_5636	B(i)	92.3	0	Lipids	脂质	Fatty Acyls	脂肪酰类	C18	Primary metabolite	-	-	LMFA01031109	M+H	C18H26O2	13.0304	-	-	pos	-	-	-	-	-	-	275.2	0.0011687044222	57.9	-0.31947	-	-	5.67613	5.67466	5.686984635619999	5.46366	5.456322554430001	5.47442	5.4496677915400005	5.47664	5.43623
pos_5762	4-oxo-Retinoic acid	-	metab_5638	B(ii)	0	59.1	Vitamins	维生素类	Vitamins	维生素类	C18	Primary metabolite	map01100	Metabolic pathways	HMDB0006285	M+H	C20H26O3	13.0304	代谢途径	C16678	pos	-	-	Metabolism	Global and overview maps	Lipids and lipid-like molecules	Prenol lipids	315.19353790099996	0.00311922199451	49.4	-6.15307	38030-57-8	Retinoids	4.96241	4.95372	4.94901	4.78259	4.7741	4.78784	4.8212049310800005	4.86108	4.8378350373400005
pos_5763	20-Hydroxyeicosatetraenoic acid	20-羟二十烷四烯酸	metab_5639	B(ii)	0	63.6	Lipids	脂质	Fatty Acyls	脂肪酰类	C18	Primary metabolite	map00590;map01100	Arachidonic acid metabolism;Metabolic pathways	HMDB0005998	M+NH4	C20H32O3	13.0304	花生四烯酸代谢;代谢途径	C14748	pos	-	-	Metabolism;Metabolism	Lipid metabolism;Global and overview maps	Lipids and lipid-like molecules	Fatty Acyls	338.269	0.000947438781041	51.8	-0.891301	79551-86-3	Fatty acids and conjugates	4.89901	4.89679	4.903971769569999	4.7113	4.70858	4.72337	4.7626	4.79228	4.761831932290001
pos_5765	Pe(o-16:2/2:0)	-	metab_5641	B(i)	95.6	0	Others	其他类	Others	其他类	C18	Others	-	-	-	M+H	C23H44NO7P	13.0304	-	-	pos	-	-	-	-	-	-	478.293	0.0019349731652	58.3	-0.208859	-	-	4.617736291030001	4.60988	4.63331	4.43094	4.45152	4.425741074599999	4.89284	4.9153	4.9275
pos_5772	7alpha-Hydroxy-3-oxochol-4-en-24-oic acid	-	metab_5648	B(i)	71.1	0	Steroids and steroid derivatives	甾体及其衍生物	Other steroids and steroid derivatives	其他类甾体及其衍生物	C18	Secondary metabolite	-	-	HMDB0062744;LMST04010239	M+H	C24H36O4	13.0534	-	-	pos	-	-	-	-	Lipids and lipid-like molecules	Steroids and steroid derivatives	389.268	0.00284585629708	53.3	-0.370261	14772-95-3	Bile acids, alcohols and derivatives	4.1138351047500015	4.14146	4.13609	3.69705	3.67821	3.72732	3.43672	3.53173	3.42927
pos_5773	3-Oxocholic acid	3-氧代-7a,12a-二羟基-5b-胆烷酸	metab_5649	B(i)	90.7	0	Steroids and steroid derivatives	甾体及其衍生物	Other steroids and steroid derivatives	其他类甾体及其衍生物	C18	Secondary metabolite	-	-	HMDB0000502;LMST04010443	M+H	C24H38O5	13.0534	-	-	pos	-	-	-	-	Lipids and lipid-like molecules	Steroids and steroid derivatives	407.279	0.0015331747177599999	57.1	-0.678249	2304-89-4	Bile acids, alcohols and derivatives	4.24765	4.26955	4.28908	3.91957	3.85734	3.85085	3.62326	3.64142	3.46024
pos_5781	Mgdg(o-16:3/2:0)	-	metab_5657	B(i)	49.2	0	Others	其他类	Others	其他类	C18	Others	-	-	-	M+H-H2O	C27H46O9	13.076583333299999	-	-	pos	-	-	-	-	-	-	497.311	0.00556221185586	49	-0.486172	-	-	3.10452	2.97668	3.15949	3.63736	3.73512	3.66178	4.30699	4.34719	4.22612
pos_5784	13-Oxogeranyllinalol	-	metab_5660	B(i)	56.1	0	Terpenoids	萜类	Diterpenoids	二萜	C18	Secondary metabolite	-	-	-	M+H	C20H32O2	13.0996	-	-	pos	-	-	-	-	-	-	305.247	0.00228017735972	50.4	-0.856931	-	-	3.82574	3.79184	3.81769	3.79519	3.83173	3.8593356878300007	3.89622	3.86842	3.87976
pos_5785	Pacificanone A	-	metab_5661	B(i)	76.3	0	Lipids	脂质	Fatty Acyls	脂肪酰类	C18	Primary metabolite	-	-	-	M+H	C20H34O3	13.0996	-	-	pos	-	-	-	-	-	-	323.258	0.0020386826486300004	54.6	-0.610394	-	-	4.25921	4.25097	4.27662	4.23345	4.25164	4.28709	4.4488	4.43009	4.4227
pos_5789	Sl(10:1_o/12:0)	-	metab_5665	B(i)	55.5	0	Others	其他类	Others	其他类	C18	Others	-	-	-	M+H	C22H43NO5S	13.0996	-	-	pos	-	-	-	-	-	-	434.28967535699996	0.0057544525783	47.4	-8.75993	-	-	2.54507	2.7142	2.64333	2.74357	2.4771000630400004	2.59145	2.1048029230200003	2.10864	2.10211
pos_5790	Lpe(22:6)	-	metab_5666	B(i)	89.4	0	Others	其他类	Others	其他类	C18	Others	-	-	HMDB0011496	M+H	C27H44NO7P	13.0996	-	-	pos	-	-	-	-	Lipids and lipid-like molecules	Glycerophospholipids	526.293	0.00274915424443	57.4	0.166807428480182	-	Glycerophosphoethanolamines	4.734019625369998	4.72372	4.79967	2.46924	2.45733	2.46379	2.4622619070700003	2.46611	2.45956
pos_5797	Pe(o-18:4/2:0)	-	metab_5673	B(i)	86.4	0	Others	其他类	Others	其他类	C18	Others	-	-	-	M+H	C25H44NO7P	13.1209	-	-	pos	-	-	-	-	-	-	502.293	0.007933251510890001	56.1	-0.515806	-	-	4.73802	4.70209	4.7651733182800005	2.7825	3.06285	2.0396561788900005	3.19892	3.15363	3.2382156023000004
pos_5801	14,15-ee-5(z)-e	14,15-ee-5（z）-e	metab_5677	B(i)	89.1	0	Lipids	脂质	Fatty Acyls	脂肪酰类	C18	Primary metabolite	-	-	-	M+H	C20H36O3	13.1364	-	-	pos	-	-	-	-	-	-	325.274	0.00428918613999	57.1	-0.527313	-	-	3.4855	3.44337	3.4952	3.72756	3.81101	3.76544	3.81428	3.7506	3.79777
pos_5813	2-linoleoyllysophosphatidylcholine	-	metab_5689	B(i)	97.2	0	Lipids	脂质	Glycerophospholipids	甘油磷脂类	C18	Primary metabolite	-	-	HMDB0061700	M+H	C26H50NO7P	13.156116666700001	-	-	pos	-	-	-	-	Lipids and lipid-like molecules	Glycerophospholipids	520.3396333019999	0.00126416420121	58.8	-0.25553	27304-12-7	Glycerophosphocholines	5.62538	5.619638321159999	5.66555	4.66004	4.6772	4.65635	5.078045776830001	5.0607	5.07679
pos_5821	6-Hydroxy-7(9)-dehydro-6,7-dihydrogeranyl acetate	-	metab_5697	B(i)	41.3	0	Lipids	脂质	Fatty Acyls	脂肪酰类	C18	Primary metabolite	-	-	-	M+H	C12H20O3	13.1753	-	-	pos	-	-	-	-	-	-	213.14839765099998	0.0047337183071499995	47.7	-0.581128	-	-	3.77463	3.69552	3.76163	3.26189	3.29755	3.27369	3.2385196943900003	3.16543	3.1662712927599994
pos_5823	Dinortrixagone	-	metab_5699	B(i)	98.1	0	Terpenoids	萜类	Sesquiterpenoids	倍半萜	C18	Secondary metabolite	-	-	-	M+H	C18H28O	13.1753	-	-	pos	-	-	-	-	-	-	261.221	0.0023939487711799995	58.9	-0.438156	-	-	4.26503	4.28291	4.29477	4.59744	4.62002	4.6062687565800005	4.753502742519999	4.75939	4.70033
pos_5826	5-OxoETE	-	metab_5702	B(i)	82.8	0	Lipids	脂质	Fatty Acyls	脂肪酰类	C18	Primary metabolite	map00590;map01100	Arachidonic acid metabolism;Metabolic pathways	HMDB0010217	M+H	C20H30O3	13.1753	花生四烯酸代谢;代谢途径	C14732	pos	-	-	Metabolism;Metabolism	Lipid metabolism;Global and overview maps	Lipids and lipid-like molecules	Fatty Acyls	319.225	0.00243729280588	53.8	-6.41176	-	Fatty acids and conjugates	3.6775	3.67472	3.68191	3.94477	3.99255	3.91986	3.47514	3.49328	3.5328394856400003
pos_5827	Allotetrahydrodeoxycorticosterone	-	metab_5703	B(i)	60.1	0	Steroids and steroid derivatives	甾体及其衍生物	Hydroxysteroids	羟基甾体	C18	Secondary metabolite	-	-	HMDB0000879	M+H	C21H34O3	13.1753	-	C13713	pos	-	-	-	-	Lipids and lipid-like molecules	Steroids and steroid derivatives	335.258	0.0024084572973500002	51.2	-0.776282	567-02-2	Hydroxysteroids	3.76112	3.71347	3.83706	4.0800496540300015	4.06568	4.0513	4.436195070259999	4.43647	4.39605
pos_5840	(9Z,12Z,15Z)-(7S,8S)-Dihydroxyoctadeca-9,12,15-trienoic acid	-	metab_5716	B(i)	92	0	Lipids	脂质	Fatty Acyls	脂肪酰类	C18	Primary metabolite	-	-	-	M+H	C18H30O4	13.1984	-	C07357	pos	-	-	-	-	-	-	311.22146724099997	0.00212579505825	57.5	-0.704776	-	-	4.42383	4.4917	4.466497111130001	4.483068870109999	4.493083927190001	4.5105	4.362614359049998	4.31342	4.30797
pos_5848	Dg(o-16:3/3:0)	-	metab_5724	B(i)	66.1	0	Others	其他类	Others	其他类	C18	Others	-	-	-	M+H	C22H38O4	13.221333333299999	-	-	pos	-	-	-	-	-	-	367.28409331800003	0.0026750631598299996	51.8	-0.526408	-	-	4.58474	4.632699253819999	4.64852	4.6869	4.65401	4.68801	4.5908226055800005	4.60519	4.65788
pos_5849	2-Linoleoyl Glycerol	2 -亚油酰甘油	metab_5725	B(ii)	0	40.4	Lipids	脂质	Fatty Acyls	脂肪酰类	C18	Primary metabolite	-	-	HMDB0245187	M+Na	C21H38O4	13.221333333299999	-	-	pos	-	-	-	-	Lipids and lipid-like molecules	Fatty Acyls	377.269	0.00483176432308	45.5	6.437739581695241	-	Lineolic acids and derivatives	3.3583100431299995	3.36332	3.40214	3.066	2.95297	3.1568672456200004	3.19497	3.24716	3.1594049672900004
pos_5859	Cnidilide	川芎内酯A	metab_5735	B(i)	94	0	Others	其他类	Others	其他类	C18	Others	-	-	HMDB0302259	M+H	C12H18O2	13.2409	-	C16937	pos	-	-	-	-	Organoheterocyclic compounds	Isobenzofurans	195.138	0.00486560495787	58.2	0.0289675686338545	3674-03-01	Not Available	4.14115	4.2384282129300015	4.21774	4.30118	4.28987	4.32993	3.88229	3.95933	3.94681
pos_5860	Cer(12:2_2O/6:0)	-	metab_5736	B(i)	45.3	0	Others	其他类	Others	其他类	C18	Others	-	-	-	M+H	C18H33NO3	13.2409	-	-	pos	-	-	-	-	-	-	312.253	0.005470387610310001	48.1	-0.901576	-	-	3.68211	3.78734	3.74159	3.90038	3.93243	4.02836	3.40763	3.33538	3.42068
pos_5862	Avocadyne 4-acetate	4 -乙酰丙酮	metab_5738	B(ii)	0	61.9	Lipids	脂质	Fatty Acyls	脂肪酰类	C18	Primary metabolite	-	-	HMDB0031049	M+H	C19H34O4	13.2409	-	-	pos	-	-	-	-	Lipids and lipid-like molecules	Fatty Acyls	327.253	0.009929562376840001	49.4	-1.28726	28884-46-0	Fatty alcohols	3.16195	3.17737	3.11701	3.3242376003400005	3.15108	3.34947	3.09985	3.20567	3.27949
pos_5893	4-n-Hexylphenol	-	metab_5769	B(i)	89.3	0	Others	其他类	Others	其他类	C18	Others	-	-	-	M+H	C12H18O	13.2865	-	C14465	pos	-	-	-	-	-	-	179.143	0.00208439346996	57.6	-0.330643	2446-69-7	-	4.8971	4.93773	4.924666682290001	5.02948	4.9985	4.99889	4.65144	4.730710998469998	4.702016984619999
pos_5894	Methyl dihydrojasmonate	乙酸甲酯	metab_5770	B(i)	57.5	0	Lipids	脂质	Fatty Acyls	脂肪酰类	C18	Primary metabolite	-	-	HMDB0031740	M+H	C13H22O3	13.2865	-	-	pos	-	-	-	-	Lipids and lipid-like molecules	Fatty Acyls	227.164	0.00178318249487	50.6	-0.615346	24851-98-7	Lineolic acids and derivatives	4.25556	4.25449	4.28674	4.0102582355699985	4.03229	4.0220481815400015	3.71449	3.73351	3.74096
pos_5896	Stearidonic acid	硬脂四烯酸	metab_5772	B(i)	87.9	0	Lipids	脂质	Fatty Acyls	脂肪酰类	C18	Primary metabolite	map00592;map01110	alpha-Linolenic acid metabolism;Biosynthesis of secondary metabolites	HMDB0006547;LMFA01030357;PW_C002804	M+H	C18H28O2	13.2865	α-亚麻酸代谢;次级代谢产物的生物合成	C16300	pos	-	-	Metabolism;Metabolism	Lipid metabolism;Global and overview maps	Lipids and lipid-like molecules	Fatty Acyls	277.216	0.00199652785492	57	-0.360232	20290-75-9	Lineolic acids and derivatives	5.82433	5.86792	5.866910601180002	5.98308	5.95057	5.950464094480001	5.616270309530001	5.6969219846099985	5.667517663330001
pos_5897	11-Hydroxyoctadeca-6,9,12-trienoic acid	-	metab_5773	B(i)	94.6	0	Lipids	脂质	Fatty Acyls	脂肪酰类	C18	Primary metabolite	-	-	-	M+H	C18H30O3	13.2865	-	-	pos	-	-	-	-	-	-	295.227	0.00169428220454	58.2	-0.734894	-	-	5.6763	5.7264165052100005	5.7135186452100015	5.84602	5.81928	5.82089	5.49793	5.578959470680001	5.55229
pos_5923	All-trans-13,14-Dihydroretinol	-	metab_5799	B(i)	56.8	0	Vitamins	维生素类	Vitamins	维生素类	C18	Primary metabolite	-	-	HMDB0011618;LMPR01090047;PW_C007207	M+H	C20H32O	13.353366666700001	-	C15492	pos	-	-	-	-	Lipids and lipid-like molecules	Prenol lipids	289.252	0.00505404470342	50.4	-0.669031	115797-14-3	Retinoids	3.3115661587800003	3.27607	3.33693	3.54336	3.61205	3.49641	3.46938	3.487317259130001	3.47817
pos_5924	Sphingosine	鞘氨醇	metab_5800	B(i)	91.7	0	Others	其他类	Amines and derivatives	胺类及其衍生物	C18	Others	map00600;map01100	Sphingolipid metabolism;Metabolic pathways	HMDB0000252;LMSP01010001;PW_C000172	M+H	C18H37NO2	13.353366666700001	鞘脂代谢;代谢途径	C00319	pos	-	-	Metabolism;Metabolism	Lipid metabolism;Global and overview maps	Organic nitrogen compounds	Organonitrogen compounds	300.289	0.00180163847053	57.5	-0.903091	123-78-4	Amines	4.61607	4.63864	4.66051	4.75166	4.7157	4.74464	4.9122	4.9413262517500005	4.92242
pos_5926	Persin	甘油酸	metab_5802	B(ii)	0	50.5	Lipids	脂质	Fatty Acyls	脂肪酰类	C18	Primary metabolite	-	-	HMDB0041103	M+H	C23H40O4	13.353366666700001	-	-	pos	-	-	-	-	Lipids and lipid-like molecules	Fatty Acyls	381.3	0.0014973600688100001	49.1	-0.423389	56164-07-9	Fatty alcohols	4.6019774379500005	4.62879	4.6598	4.81189	4.841929846549999	4.78857	4.699095965480001	4.73233	4.75288
pos_5938	16beta,17beta-Dihydroxy-16-methylestr-4-en-3-one	-	metab_5814	B(i)	74.8	0	Steroids and steroid derivatives	甾体及其衍生物	Estrane steroids	雌甾烷	C18	Secondary metabolite	-	-	-	M+H	C19H28O3	13.376683333299999	-	C15144	pos	-	-	-	-	-	-	305.211	0.0036789498048000004	54.2	-0.673169	1911-14-4	-	3.2984606112400003	3.5144180096699995	3.47092	2.5541	2.51124	2.51871	2.8348106155400004	2.98474	2.91686
pos_5950	(E,E)-2,9,9-Trimethyl-6-methylene-2,7-cycloundecadien-1-one	-	metab_5826	B(i)	75.3	0	Terpenoids	萜类	Sesquiterpenoids	倍半萜	C18	Secondary metabolite	-	-	-	M+H	C15H22O	13.3978	-	-	pos	-	-	-	-	-	-	219.174	0.0026811239714	54.4	-0.385839	-	-	4.2166	4.24092	4.27059	4.39545	4.365498851080002	4.37443	4.47738	4.50726	4.51476
pos_5952	Methyl 2-methyl-6-(4-methyl-2-oxocyclohex-3-en-1-yl)hept-2-enoate	-	metab_5828	B(i)	35.6	0	Terpenoids	萜类	Sesquiterpenoids	倍半萜	C18	Secondary metabolite	-	-	-	M+CH3OH+H	C16H24O3	13.3978	-	-	pos	-	-	-	-	-	-	297.206	0.0017945018673099999	46.5	-0.665011	-	-	4.39689	4.43964	4.4392	4.410146917890001	4.38116	4.37596	4.30704	4.31494	4.39443
pos_5953	Arachidonic acid	花生四烯酸	metab_5829	B(i)	41.1	0	Lipids	脂质	Fatty Acyls	脂肪酰类	C18	Primary metabolite	map00590;map00591;map01100;map01040	Arachidonic acid metabolism;Linoleic acid metabolism;Metabolic pathways;Biosynthesis of unsaturated fatty acids	HMDB0001043;LMFA01030001;PW_C000821	M+H	C20H32O2	13.3978	花生四烯酸代谢;亚油酸代谢;代谢途径;不饱和脂肪酸的生物合成	C00219	pos	Lipids	Fatty acids	Metabolism;Metabolism;Metabolism;Metabolism	Lipid metabolism;Lipid metabolism;Global and overview maps;Lipid metabolism	Lipids and lipid-like molecules	Fatty Acyls	305.247	0.000574670373861	47.4	-0.933798	506-32-1	Fatty acids and conjugates	3.66878	3.757405162940001	3.72831	3.74938	3.68281	3.63884	3.71976	3.72678	3.74093
pos_5969	1-palmitoyl-sn-glycero-3-phosphocholine	1-棕榈酰溶血磷脂酰胆碱	metab_5845	B(i)	98.4	0	Lipids	脂质	Glycerophospholipids	甘油磷脂类	C18	Primary metabolite	-	-	-	M+H	C24H50NO7P	13.420983333299999	-	C04102	pos	-	-	-	-	-	-	496.33981814699996	0.0012169744956300002	59.4	0.105261717270372	-	-	5.97278	5.979351642619998	6.02302	5.23247	5.22865	5.22582	5.48727	5.48674	5.5447907060000015
pos_5976	(3b,22a)-12-Oleanene-3,22,24,29-tetrol 3-[arabinosyl-(1->3)-arabinoside]	（3b，22a）-12-齐墩果烯-3,22,24,29-四醇3-[阿拉伯糖基-（1->3）-阿拉伯糖苷]	metab_5852	B(ii)	0	56.3	Terpenoids	萜类	Triterpenoids	三萜	C18	Secondary metabolite	-	-	HMDB0034818	M+ACN+H	C40H66O12	13.420983333299999	-	-	pos	-	-	-	-	Lipids and lipid-like molecules	Prenol lipids	780.489	0.00349297473706	49.1	-0.268688	211944-26-2	Triterpenoids	4.56862	4.618632152819999	4.63701	4.658324647980001	4.63804	4.65138	4.76056	4.71957	4.7393730531800005
pos_5978	Grandilobatin A	-	metab_5854	B(i)	65.3	0	Terpenoids	萜类	Diterpenoids	二萜	C18	Secondary metabolite	-	-	-	M+H-H2O	C21H36O4	13.4406	-	-	pos	-	-	-	-	-	-	335.25784185099997	0.00303904713086	52.1	-0.651594	-	-	3.50695	3.51418	3.54923	3.8547564198300006	3.85689	3.86147	3.92254	3.98948	4.01462
pos_5979	C25-Epoxy-apo-aldehyde	-	metab_5855	B(i)	71.1	0	Terpenoids	萜类	Diterpenoids	二萜	C18	Secondary metabolite	-	-	HMDB0303974	M+H	C25H34O3	13.4406	-	C14045	pos	-	-	-	-	Lipids and lipid-like molecules	Prenol lipids	383.25796608300004	0.0021086795105	53.2	-0.275469	-	Diterpenoids	2.80073	2.80749	2.67425	2.94918	2.69781	2.9808520565599994	3.32001	3.25334	3.34002
pos_5984	(+/-)8,9-dhet	-	metab_5860	B(i)	72.3	0	Others	其他类	Others	其他类	C18	Others	-	-	-	M+H	C20H34O4	13.4636	-	-	pos	-	-	-	-	-	-	339.253	0.00496821724718	53.7	-0.439169	-	-	3.47011	3.5151168478300003	3.59278	3.26117	3.31478	3.3351890015400003	3.60878	3.70095	3.60538
pos_5997	Dibutyl phthalate	酞酸二丁酯	metab_5873	B(i)	92.7	0	Phenolic acids and derivatives	酚酸类及其衍生物	Benzoic acids and derivatives	苯甲酸及其衍生物	C18	Secondary metabolite	-	-	HMDB0033244	M+H	C16H22O4	13.4868	-	C14214	pos	-	-	-	-	Benzenoids	Benzene and substituted derivatives	279.159	0.00157512653505	57.8	-0.254632	84-74-2	Benzoic acids and derivatives	4.47962	4.467563017869999	4.47031	4.6132	4.64449	4.68848	4.70976	4.71911	4.70039
pos_5998	Monacolin L acid	-	metab_5874	B(i)	88.2	0	Organic acids and derivatives	有机酸及其衍生物	Organic acids and derivatives	有机酸及其衍生物	C18	Secondary metabolite	map01100;map01110	Metabolic pathways;Biosynthesis of secondary metabolites	-	M+H	C19H30O4	13.4868	代谢途径;次级代谢产物的生物合成	C20853	pos	-	-	Metabolism;Metabolism	Global and overview maps;Global and overview maps	-	-	323.22159665099997	0.00180462579356	56.2	-0.276901	-	-	4.20322	4.17521	4.22489	3.37062	3.37577	3.43875	3.67884	3.5899550228500003	3.66582
pos_6006	4-Dodecylphenol	4 -十二烷基酚	metab_5882	B(i)	95.1	0	Others	其他类	Others	其他类	C18	Others	-	-	-	M+H	C18H30O	13.5046	-	C14245	pos	-	-	-	-	-	-	263.237	0.0023962758128000003	58.3	-0.393155	104-43-8	-	4.23625	4.2113	4.23785	4.5360592117400005	4.56824	4.5798611751300005	4.75032	4.78715	4.734051610290001
pos_6007	Methyl 15-hydroxy-7-labden-17-oate	-	metab_5883	B(i)	44.2	0	Terpenoids	萜类	Diterpenoids	二萜	C18	Secondary metabolite	-	-	-	M+H	C21H36O3	13.5046	-	-	pos	-	-	-	-	-	-	337.274	0.00306011579373	48.1	-0.649674	-	-	4.26558	4.14401	4.15643	4.529981147769999	4.50404	4.50577	4.53692	4.72721	4.70811
pos_6008	Glyceryl monolinoleate	亚油酸单甘油酯	metab_5884	B(i)	91.5	0	Lipids	脂质	Fatty Acyls	脂肪酰类	C18	Primary metabolite	-	-	HMDB0242115	M+H	C21H38O4	13.5046	-	-	pos	-	-	-	-	Lipids and lipid-like molecules	Fatty Acyls	355.28409471599997	0.004636441109840001	57.1	-0.540293	-	Lineolic acids and derivatives	4.3135313756699984	4.3339339292300005	4.3404	4.78472	4.8147	4.816049759049999	5.03503	5.1088690562300005	5.00953
pos_6022	3-Ketosphingosine	3 -酮鞘氨醇	metab_5898	B(i)	86.4	0	Others	其他类	Ketones and derivatives	酮类及其衍生物	C18	Others	-	-	HMDB0245914;LMSP01010002	M+H	C18H35NO2	13.5279	-	C06121	pos	-	-	-	-	Organic oxygen compounds	Organooxygen compounds	298.274	0.000940695369506	56.5	-0.547836	-	Carbonyl compounds	4.849269795950001	4.84433	4.87726	4.995516014980001	5.00236	5.03782	5.22033	5.22645	5.22603
pos_6028	LysoPC(18:1(11Z))	-	metab_5904	B(i)	96.2	0	Lipids	脂质	Glycerophospholipids	甘油磷脂类	C18	Primary metabolite	map00564	Glycerophospholipid metabolism	HMDB0010385	M+H	C26H52NO7P	13.5279	甘油磷脂代谢	C04230	pos	Lipids	Phospholipids	Metabolism	Lipid metabolism	Lipids and lipid-like molecules	Glycerophospholipids	522.355	0.0032218938302199995	57.2	-0.369897	-	Glycerophosphocholines	5.3784843545599985	5.38972	5.40549	4.56904	4.59272	4.58412	4.861337208409999	4.872524919730001	4.84953
pos_6029	NAGlySer(13:1/11:0)	-	metab_5905	B(i)	37.9	0	Others	其他类	Others	其他类	C18	Others	-	-	-	M+H	C29H52N2O7	13.5279	-	-	pos	-	-	-	-	-	-	541.39	0.004773499902310001	44.2	9.18946372353487	-	-	3.79661	3.73725	3.81092	4.40079	4.44916	4.52351	4.21378	4.19454	4.15712
pos_6045	Myrianthic acid	-	metab_5921	B(i)	59.3	0	Others	其他类	Others	其他类	C18	Others	-	-	HMDB0035875	M+H	C30H48O6	13.5494	-	-	pos	-	-	-	-	Lipids and lipid-like molecules	Prenol lipids	505.352	0.006647059809109999	50.7	0.214209459231743	89786-84-5	Triterpenoids	4.14529	4.131845547019998	4.16381	4.45462	4.48117	4.4741985606800005	4.37894	4.29991	4.28682
pos_6050	Zerumbone	花薑酮	metab_5926	B(i)	45	0	Terpenoids	萜类	Sesquiterpenoids	倍半萜	C18	Secondary metabolite	-	-	HMDB0036667	M+CH3OH+H	C15H22O	13.563666666700001	-	C20262	pos	-	-	-	-	Lipids and lipid-like molecules	Prenol lipids	251.2	0.0034276347883699996	48.6	-0.708896	471-05-6	Sesquiterpenoids	3.7569	3.6872	3.73546	3.82776	3.87151	3.88776	3.89001	3.88794	3.88316
pos_6058	Sl(12:0_o/16:2)	-	metab_5934	B(i)	50	0	Others	其他类	Others	其他类	C18	Others	-	-	-	M+H	C28H53NO5S	13.563666666700001	-	-	pos	-	-	-	-	-	-	516.368	0.0049375890442	46	-6.52185	-	-	3.65996	3.60289	3.68562	4.06002	4.03699	4.04516	3.72892	3.7954709752699993	3.78382
pos_6066	Decylubiquinol	-	metab_5942	B(i)	94.1	0	Others	其他类	Others	其他类	C18	Others	-	-	-	M+H	C19H32O4	13.5763	-	C15495	pos	-	-	-	-	-	-	325.237	0.00274213155543	58	-0.32206	-	-	4.919608953319999	4.95131	4.96292	4.25438	4.221812980119998	4.2545376472099985	4.21479	4.21435	4.1899547230000005
pos_6075	[R-(E,E)]-13,14-Dihydroxy-6,10,14-trimethyl-5,9-pentadecadien-2-one	-	metab_5950	B(i)	84.5	0	Terpenoids	萜类	Sesquiterpenoids	倍半萜	C18	Secondary metabolite	-	-	-	M+H	C18H32O3	13.5924	-	-	pos	-	-	-	-	-	-	297.242	0.0110617812647	56.1	-0.593471	-	-	3.73068	3.64704	3.67083	4.01297	4.0161052054000015	4.03279	4.1061875590199985	4.01816	4.07273
pos_6086	Pinolenic acid	皮诺敛酸	metab_5961	B(i)	76.7	0	Lipids	脂质	Fatty Acyls	脂肪酰类	C18	Primary metabolite	-	-	HMDB0256562;LMFA01030344	M+H-H2O	C18H30O2	13.611916666700001	-	-	pos	-	-	-	-	Lipids and lipid-like molecules	Fatty Acyls	261.221	0.0046172978471599995	54.7	-0.487575	-	Lineolic acids and derivatives	4.083807596830002	4.07551	4.12776	4.10398	4.09061	4.11526	4.1490355051300005	4.130020040580002	4.13133
pos_6105	Chenodeoxycholic acid glycine conjugate	鹅去氧胆酸甘氨酸结合物	metab_5980	B(ii)	0	48.6	Steroids and steroid derivatives	甾体及其衍生物	Other steroids and steroid derivatives	其他类甾体及其衍生物	C18	Secondary metabolite	-	-	HMDB0000637	M+CH3OH+H	C26H43NO5	13.6316	-	C05466	pos	-	-	-	-	Lipids and lipid-like molecules	Steroids and steroid derivatives	482.34747571199995	0.008880182807079999	48.7	-0.309249	640-79-9	Bile acids, alcohols and derivatives	2.27557	2.3375586468700003	2.42773	2.8573154040400004	2.42515	2.64316	1.7266642828999998	1.8592	1.69115
pos_6111	Aglatomin A	-	metab_5986	B(i)	90.8	0	Steroids and steroid derivatives	甾体及其衍生物	Pregnane steroids	孕甾烷	C18	Secondary metabolite	-	-	-	M+H	C22H36O3	13.6459	-	-	pos	-	-	-	-	-	-	349.27353339900003	0.0029058867165700003	57.4	-0.539948	-	-	5.28345	5.2743024192400005	5.30112	5.62634	5.5936569134899985	5.6468714005299985	5.50214	5.47277	5.53088
pos_6135	Halaminol C	-	metab_6010	B(i)	35.6	0	Others	其他类	Amines and derivatives	胺类及其衍生物	C18	Others	-	-	-	M+H	C14H29NO	13.667416666700001	-	-	pos	-	-	-	-	-	-	228.232	0.00392085987845	46.7	-0.485898	-	-	4.06016	4.094743374519998	4.08783	4.157344987769998	4.1273589934500015	4.21038	4.31513	4.2429	4.24404
pos_6136	Ent-16a-Hydroxy-17-acetoxy-19-kauranal	-	metab_6011	B(ii)	0	51	Terpenoids	萜类	Diterpenoids	二萜	C18	Secondary metabolite	-	-	HMDB0041495	M+CH3OH+H	C22H34O4	13.667416666700001	-	-	pos	-	-	-	-	Lipids and lipid-like molecules	Prenol lipids	395.27875493199997	0.0072650749402	48	-1.2307	177742-55-1	Diterpenoids	3.61781	3.6065	3.67288	3.56006	3.5730168759500005	3.59581	3.5378	3.6013802579100003	3.54696
pos_6144	2E,4Z-Octadienal	-	metab_6019	B(i)	76	0	Others	其他类	Aldehydes and derivatives	醛类及其衍生物	C18	Others	-	-	LMFA06000132	M+H	C8H12O	13.683416666700001	-	-	pos	-	-	-	-	-	-	125.096	0.00293164387146	54.4	0.7910047100485571	-	-	3.63915	3.67484	3.7086	3.85519	3.82484	3.8272	3.84095	3.88172	3.8371262591800006
pos_6145	O-Methylacetophenone	-	metab_6020	B(i)	60.5	0	Others	其他类	Ketones and derivatives	酮类及其衍生物	C18	Others	-	-	HMDB0032386	M+NH4	C9H10O	13.683416666700001	-	-	pos	-	-	-	-	Organic oxygen compounds	Organooxygen compounds	152.107	0.0022136297587299998	51.1	-0.154693	577-16-2	Carbonyl compounds	3.5742382905400003	3.58119	3.62962	3.79708	3.74924	3.76215	3.81404	3.78082	3.76797
pos_6147	(-)-Noranthoplone	-	metab_6022	B(i)	41.4	0	Others	其他类	Ketones and derivatives	酮类及其衍生物	C18	Others	-	-	-	M+H	C14H24O	13.683416666700001	-	-	pos	-	-	-	-	-	-	209.18987849400003	0.00658950099225	47.7	-0.544363	-	-	4.02229	4.1139	4.08929	4.17461	4.12028	4.19224	4.28382	4.29354	4.290579394669998
pos_6159	4,5-(methanoxyethano)isolongifol-4-ene	-	metab_6034	B(i)	88.4	0	Terpenoids	萜类	Sesquiterpenoids	倍半萜	C18	Secondary metabolite	-	-	LMPR0103500012	M+NH4	C18H28O	13.7063	-	-	pos	-	-	-	-	-	-	278.248	0.0031679260309699997	56.9	-0.483957	-	-	4.24461	4.31399	4.29504	4.49889	4.44954	4.46199	4.55961	4.57803	4.5674
pos_6160	Wyethic acid	-	metab_6035	B(i)	83.6	0	Terpenoids	萜类	Diterpenoids	二萜	C18	Secondary metabolite	-	-	-	M+H	C19H30O3	13.7063	-	-	pos	-	-	-	-	-	-	307.227	0.00358308890963	56	-0.520363	-	-	5.35175	5.40985	5.387442428049999	4.46076	4.445534793219999	4.41476	4.56677	4.62818	4.6201
pos_6171	Orthosphenic acid	-	metab_6046	B(i)	72.2	0	Terpenoids	萜类	Triterpenoids	三萜	C18	Secondary metabolite	-	-	-	M+H	C30H48O5	13.7294	-	-	pos	-	-	-	-	-	-	489.357	0.00395569287955	53.7	-0.0422908	-	-	4.32865	4.41945	4.4085	4.936696970940001	4.84316	4.87798	4.72717	4.68987	4.7242856353699985
pos_6184	(3E,5Z)-3,5-Octadien-1-ol	（3E，5Z）-3,5-辛二烯-1-醇	metab_6059	B(ii)	0	44.1	Lipids	脂质	Fatty Acyls	脂肪酰类	C18	Primary metabolite	-	-	HMDB0040149	M+H-H2O	C8H14O	13.763	-	-	pos	-	-	-	-	Lipids and lipid-like molecules	Fatty Acyls	109.101	0.00294610139424	42.5	2.0710177455934	70664-95-8	Fatty alcohols	4.68503	4.68386	4.711875403680001	4.7851895873400005	4.76324	4.7715565703500005	4.85962	4.87077	4.857930805480001
pos_6189	Montanol	-	metab_6064	B(i)	85.9	0	Terpenoids	萜类	Sesquiterpenoids	倍半萜	C18	Secondary metabolite	-	-	-	M+H	C21H36O4	13.763	-	C09137	pos	-	-	-	-	-	-	353.269	0.004544230371439999	56.4	-0.378313	71117-50-5	-	4.13838	4.1804	4.24014	3.80928	3.87425	3.87479	3.96963	4.01298	3.95687
pos_6200	1-Monopalmitin	1-单棕榈酸甘油酯	metab_6075	B(i)	93	0	Lipids	脂质	Glycerolipids	甘油脂类	C18	Primary metabolite	-	-	HMDB0011564	M+H	C19H38O4	13.7863	-	-	pos	-	-	-	-	Lipids and lipid-like molecules	Glycerolipids	331.284	0.00472085147831	57.7	-0.88616	32899-41-5	Monoradylglycerols	4.064899349569998	4.06063	4.116384598630002	4.256535727159998	4.24278	4.25444	4.42112	4.44577	4.46884
pos_6220	Dg(18:3/18:5)	-	metab_6095	B(i)	60	0	Others	其他类	Others	其他类	C18	Others	-	-	-	M+H	C39H60O5	13.81	-	-	pos	-	-	-	-	-	-	609.4514944480001	0.0008994023387959999	51.7	0.23501521461491198	-	-	4.93102	4.93579	4.95407	5.52026	5.510266990780001	5.50455	5.18018	5.14744	5.16191
pos_6226	4-Androstenediol	4 -雄烯二醇	metab_6100	B(i)	70.2	0	Steroids and steroid derivatives	甾体及其衍生物	Androstane steroids	雄甾烷	C18	Secondary metabolite	-	-	HMDB0005849;LMST02020105	M+H	C19H30O2	13.831216666700001	-	C14210	pos	Steroids	19-Carbon atoms	-	-	Lipids and lipid-like molecules	Steroids and steroid derivatives	291.232	0.00633336490015	53.3	-0.204484	1156-92-9	Androstane steroids	3.85809	3.91338	3.9127	3.192	3.164723329370001	3.09304	2.8364	2.7676025522900005	2.79549
pos_6233	Kadangustin D	-	metab_6107	B(i)	78.5	0	Tannins	鞣质	Tannins	鞣质	C18	Secondary metabolite	-	-	-	M+H	C34H38O10	13.831216666700001	-	-	pos	-	-	-	-	-	-	607.255	0.00213472272661	54.7	1.8279562705751597	-	-	2.29722	2.30167	2.31107	2.93113	2.77982	2.40032	3.21334	3.21128	2.95468
pos_6237	1-Hexadecanol	十六醇	metab_6111	B(ii)	0	43.8	Lipids	脂质	Fatty Acyls	脂肪酰类	C18	Primary metabolite	map00071	Fatty acid degradation	HMDB0003424	M+Na	C16H34O	13.8545	脂肪酸降解	C00823	pos	-	-	Metabolism	Lipid metabolism	Lipids and lipid-like molecules	Fatty Acyls	265.252	0.00727775938726	46.4	8.940792566976599	36653-82-4	Fatty alcohols	4.0112	3.96006	3.99589	4.09768	4.11618	4.08947	4.23812	4.250535662190002	4.29084
pos_6238	3a,7a,12a-Trihydroxy-5b-cholestan-26-al	3a，7a，12a-三羟基-5b-胆甾烷-26-铝	metab_6112	B(ii)	0	55.8	Steroids and steroid derivatives	甾体及其衍生物	Other steroids and steroid derivatives	其他类甾体及其衍生物	C18	Secondary metabolite	map01100	Metabolic pathways	HMDB0003533	M+ACN+Na	C27H46O4	13.8545	代谢途径	C01301	pos	-	-	Metabolism	Global and overview maps	Lipids and lipid-like molecules	Steroids and steroid derivatives	498.358	0.004311530899520001	48.8	5.7503457820218005	3836-01-09	Bile acids, alcohols and derivatives	3.17616	3.15953	3.1498	3.60649	3.59621	3.38271	2.49175	0.677233	2.85561
pos_6253	3-(2'-Hydroxyethyl)-5-(2''-hydroxypropyl)-dihydrofuran-2(3H)-one	-	metab_6127	B(i)	92.7	0	Others	其他类	Lactones	内酯类	C18	Others	-	-	-	M+H	C9H16O4	13.884566666700001	-	-	pos	-	-	-	-	-	-	189.112	0.00235348317431	58.1	-0.539575	-	-	4.46727	4.47084	4.457067397009999	4.5201231584800015	4.538237155969999	4.54423	4.66682	4.74889	4.61031
pos_6256	Stigmatellin Y	-	metab_6130	B(i)	96.9	0	Others	其他类	Benzopyrans	苯骈吡喃类	C18	Others	-	-	-	M+H	C29H40O6	13.884566666700001	-	C12150	pos	-	-	-	-	-	-	485.29	0.00152616625187	59.1	-0.235063	-	-	6.3239858898399985	6.333533848069999	6.319613796980001	6.39381	6.41829	6.41167	6.54243	6.6506262321200005	6.51677
pos_6259	Carindone	-	metab_6133	B(ii)	0	61.8	Terpenoids	萜类	Sesquiterpenoids	倍半萜	C18	Secondary metabolite	-	-	HMDB0038189	M+NH4	C31H44O6	13.884566666700001	-	-	pos	-	-	-	-	Lipids and lipid-like molecules	Prenol lipids	530.347	0.000997417507159	52.1	-0.260479	38045-62-4	Sesquiterpenoids	6.62016	6.62973	6.6194427448800015	6.674923596159999	6.6959	6.69589	6.833638662869999	6.930624935560001	6.8251
pos_6260	Sl(12:1_o/18:2_o)	-	metab_6134	B(i)	58.1	0	Others	其他类	Others	其他类	C18	Others	-	-	-	M+H	C30H55NO6S	13.884566666700001	-	-	pos	-	-	-	-	-	-	558.38	0.0028293310115500006	48.8	-4.50551	-	-	4.54975	4.53394	4.531013635290001	4.61032	4.67478	4.6394	4.804	4.8412668002800014	4.69773
pos_6263	Bornyl acetate	醋酸冰片酯	metab_6137	B(i)	41.9	0	Terpenoids	萜类	Monoterpenoids	单萜	C18	Secondary metabolite	-	-	HMDB0040725;HMDB0303194	M+H-H2O	C12H20O2	13.9072	-	C11338	pos	-	-	-	-	Lipids and lipid-like molecules	Prenol lipids	179.143	0.0019260214873699998	47.7	-0.502293	20347-65-3	Monoterpenoids	4.07291	4.04279	4.03743	3.41856	3.47775	3.44822	3.44192	3.40533	3.3083513464700003
pos_6264	Methyl (10E,12Z,15Z)-9-hydroxyoctadeca-10,12,15-trienoate	-	metab_6138	B(i)	97	0	Lipids	脂质	Fatty Acyls	脂肪酰类	C18	Primary metabolite	-	-	-	M+H	C19H32O3	13.9072	-	-	pos	-	-	-	-	-	-	309.24206511200003	0.00164882083557	58.5	-1.15563	-	-	5.48573	5.475627458069999	5.45729	4.69444	4.68335	4.72637	4.54616	4.59153	4.55731
pos_6265	6E-Geranylgeraniol-19-oic acid-1-O-methyl ether	-	metab_6139	B(i)	36.4	0	Terpenoids	萜类	Diterpenoids	二萜	C18	Secondary metabolite	-	-	-	M+H	C21H34O3	13.9072	-	-	pos	-	-	-	-	-	-	335.258	0.0050838225816	46.3	-1.03548	-	-	3.65885	3.6462	3.6746	3.45028	3.51811	3.4913156248900004	3.5847970573400003	3.53293	3.43247
pos_6268	Sl(12:2_o/16:0)	-	metab_6142	B(i)	50.6	0	Others	其他类	Others	其他类	C18	Others	-	-	-	M+H	C28H53NO5S	13.9072	-	-	pos	-	-	-	-	-	-	516.3678907030001	0.00948752959468	46.5	-7.43267	-	-	3.29462	3.29685	3.17143	3.91905	3.91495	3.82767	3.64402	3.71406	3.67139
pos_6274	Farnesol	法尼醇	metab_6148	B(i)	58.7	0	Terpenoids	萜类	Sesquiterpenoids	倍半萜	C18	Secondary metabolite	map00510;map01100;map01110;map00900	N-Glycan biosynthesis;Metabolic pathways;Biosynthesis of secondary metabolites;Terpenoid backbone biosynthesis	HMDB0004305;HMDB0243636	M+H	C15H26O	13.9298	N-聚糖生物合成;代谢途径;次级代谢产物的生物合成;萜类骨架生物合成	C01493;C06081	pos	-	-	Metabolism;Metabolism;Metabolism;Metabolism	Glycan biosynthesis and metabolism;Global and overview maps;Global and overview maps;Metabolism of terpenoids and polyketides	Lipids and lipid-like molecules	Prenol lipids	223.205	0.00243883036786	51.1	-0.770001	4602-84-0	Sesquiterpenoids	4.8754240299300005	4.829850145369999	4.8270132108800015	4.93203	4.90763	4.91938	5.05005	5.08856	5.0797
pos_6276	17beta-Hydroxy-2alpha-(methoxymethyl)-17-methyl-5alpha-androstan-3-one	-	metab_6150	B(i)	70.2	0	Steroids and steroid derivatives	甾体及其衍生物	Androstane steroids	雄甾烷	C18	Secondary metabolite	-	-	-	M+CH3OH+H	C22H36O3	13.9298	-	C14919	pos	-	-	-	-	-	-	381.3	0.00438306932392	53.1	-0.807753	-	-	2.79348	2.83192	2.64227	3.05109	2.95183	2.88655	2.51135	2.5504	1.99458
pos_6287	N,N-Dimethylaniline	N,N-二甲基苯胺	metab_6161	B(i)	36.3	0	Others	其他类	Amines and derivatives	胺类及其衍生物	C18	Others	-	-	HMDB0001020	M+H	C8H11N	13.951066666700001	-	C02846	pos	-	-	-	-	Organic nitrogen compounds	Organonitrogen compounds	122.09656730100001	0.00371032206038	46.7	1.1686570497283102	121-69-7	Amines	5.50382	5.49444	5.49753	5.64102	5.64601	5.629318173580001	5.70933	5.69978	5.69642
pos_6290	1-Arachidonoylglycerol	1 -花生四烯酰甘油	metab_6164	B(i)	83.2	0	Lipids	脂质	Glycerolipids	甘油脂类	C18	Primary metabolite	-	-	HMDB0011578;HMDB0243830	M+H	C23H38O4	13.951066666700001	-	C13857	pos	-	-	-	-	Lipids and lipid-like molecules	Glycerolipids	379.284	0.004856830268229999	55.4	-0.846699	124511-15-5	Monoradylglycerols	2.9826815575800003	3.13994	3.03931	3.27911	3.19987	3.0890799601700003	2.65365	2.9136	2.97793
pos_6299	Farnesyl acetone	法尼基丙酮	metab_6173	B(i)	97.8	0	Terpenoids	萜类	Diterpenoids	二萜	C18	Secondary metabolite	-	-	-	M+H	C18H30O	13.9688	-	-	pos	-	-	-	-	-	-	263.237	0.0024193368779	58.9	-0.611357	-	-	5.12692	5.093630590880001	5.07811	5.23377	5.19207	5.17296	5.33897	5.380051540319999	5.35702
pos_6302	N-cis-11,14-eicosadienoyl ethanolamine	-	metab_6176	B(i)	82.2	0	Others	其他类	Amines and derivatives	胺类及其衍生物	C18	Others	-	-	LMFA08040002	M+H	C22H41NO2	13.9688	-	-	pos	-	-	-	-	-	-	352.32067502300004	0.00801847723834	55.3	-0.942085	-	-	3.99894	4.02916	4.04969	4.10941	3.99212	4.02968	4.35311	4.33091	4.24231
pos_6306	Ganoderiol A	灵芝醇A	metab_6180	B(ii)	0	65.8	Terpenoids	萜类	Triterpenoids	三萜	C18	Secondary metabolite	-	-	HMDB0035326	M+CH3OH+Na	C30H50O4	13.9688	-	-	pos	-	-	-	-	Lipids and lipid-like molecules	Prenol lipids	529.389	0.00421215376695	48.7	5.44471199296299	-	Triterpenoids	4.34121	4.36058	4.35409	4.77481	4.7217976662300005	4.7075041981300005	4.63941	4.59266	4.545756592169999
pos_6321	2-octadecanoyl-sn-glycero-3-phosphocholine	-	metab_6195	B(i)	97.6	0	Lipids	脂质	Glycerophospholipids	甘油磷脂类	C18	Primary metabolite	-	-	LMGP01050076	M+H	C26H54NO7P	13.9918	-	-	pos	-	-	-	-	-	-	524.371	0.00172113276177	57.7	0.389593600804929	-	-	5.18474	5.14694	5.1640071154100005	4.79974	4.71463	4.75564	4.815707138780001	4.81877	4.80504
pos_6323	Ginsenoside Rh3	人参皂苷Rh3	metab_6197	B(ii)	0	53.7	Terpenoids	萜类	Triterpenoids	三萜	C18	Secondary metabolite	-	-	HMDB0039645	M+NH4	C36H60O7	13.9918	-	-	pos	-	-	-	-	Lipids and lipid-like molecules	Prenol lipids	622.468	0.00266924184828	49.5	0.110705389658421	105558-26-7	Triterpenoids	4.538620539119999	4.54278	4.53143	4.739929410219999	4.65079	4.67727	4.701426592280001	4.69275	4.67078
pos_6330	12-Hydroxy-8,10-octadecadienoic acid	12 -羟基- 8，10 -十八碳二烯酸	metab_6204	B(ii)	0	50	Lipids	脂质	Fatty Acyls	脂肪酰类	C18	Primary metabolite	-	-	HMDB0029998	M+NH4	C18H32O3	14.004266666700001	-	-	pos	-	-	-	-	Lipids and lipid-like molecules	Fatty Acyls	314.26877216099996	0.007618452841930001	48.9	-0.669245	170171-31-0	Lineolic acids and derivatives	1.40474	1.86566	1.82709	2.04575	1.10074	2.14567	2.1659	2.84558	2.5625961152700003
pos_6331	Eicosanedioic acid	二十烷二酸	metab_6205	B(ii)	0	44.6	Lipids	脂质	Fatty Acyls	脂肪酰类	C18	Primary metabolite	-	-	HMDB0242141	M+CH3OH+Na	C20H38O4	14.004266666700001	-	-	pos	-	-	-	-	Lipids and lipid-like molecules	Fatty Acyls	397.29496252900003	0.0147621941332	46.4	7.4583798910263095	-	Fatty acids and conjugates	4.6341164603400005	4.573728364080001	4.52752	4.15437	4.14714	4.18608	4.04487	4.05109	4.00956
pos_6341	Palmitoyl ethanolamide	-	metab_6215	B(i)	79	0	Organic acids and derivatives	有机酸及其衍生物	Organic acids and derivatives	有机酸及其衍生物	C18	Secondary metabolite	-	-	HMDB0002100	M+H	C18H37NO2	14.0365	-	C16512	pos	-	-	-	-	Organic acids and derivatives	Carboximidic acids and derivatives	300.289	0.00154524022131	55.1	-0.94932	544-31-0	Carboximidic acids	3.79055	3.72075	3.832126369740001	4.16244	4.13299	4.11999	3.92404	3.93999	3.99431
pos_6348	Urobilinogen	尿胆素原	metab_6222	B(ii)	0	45.6	Others	其他类	Tetrapyrroles and derivatives	四吡咯及其衍生物	C18	Others	map01100;map01110;map00860	Metabolic pathways;Biosynthesis of secondary metabolites;Porphyrin metabolism	HMDB0004158	M+ACN+Na	C33H42N4O6	14.0473	代谢途径;次级代谢产物的生物合成;卟啉与叶绿素代谢	C05790;C05791	pos	-	-	Metabolism;Metabolism;Metabolism	Global and overview maps;Global and overview maps;Metabolism of cofactors and vitamins	Organoheterocyclic compounds	Tetrapyrroles and derivatives	654.332	0.0013788292082599998	46.5	9.967791601482109	14684-37-8;17208-65-0	Bilirubins	5.1533247517300005	4.99677	5.13605	5.08535	5.02034	5.0275	5.07708	5.04912	5.0576685048000005
pos_6351	N1,N5,N10-Tris-trans-p-coumaroylspermine	-	metab_6225	B(ii)	0	62.7	Phenolic acids and derivatives	酚酸类及其衍生物	Cinnamic acids and derivatives	肉桂酸及其衍生物	C18	Secondary metabolite	-	-	HMDB0039962	M+ACN+H	C37H44N4O6	14.0473	-	-	pos	-	-	-	-	Phenylpropanoids and polyketides	Cinnamic acids and derivatives	682.3633962490001	0.00177497301159	50.5	5.443432347450861	-	Hydroxycinnamic acids and derivatives	5.4340375852100005	5.30757	5.43023	5.351544279840001	5.2838121453300015	5.2711	5.39713	5.39121	5.40037
pos_6357	27-Deoxy-5b-cyprinol	27-脱氧-5β-鱼胆酸	metab_6231	B(ii)	0	74.8	Steroids and steroid derivatives	甾体及其衍生物	Other steroids and steroid derivatives	其他类甾体及其衍生物	C18	Secondary metabolite	map01100	Metabolic pathways	HMDB0001231	M+NH4	C27H48O4	14.0586	代谢途径	C05446	pos	-	-	Metabolism	Global and overview maps	Lipids and lipid-like molecules	Steroids and steroid derivatives	454.389	0.0034900055269499997	54.3	-0.134015	862-53-3	Bile acids, alcohols and derivatives	1.39596	1.40026	1.40933	1.5011	1.48953	1.49581	1.49432	1.4980637661000002	1.4916974337399995
pos_6368	Asiatic acid	积雪草酸	metab_6242	B(i)	86.4	0	Terpenoids	萜类	Triterpenoids	三萜	C18	Secondary metabolite	-	-	HMDB0035782	M+H	C30H48O5	14.0711	-	C08617	pos	-	-	-	-	Lipids and lipid-like molecules	Prenol lipids	489.357	0.0025100247691500002	56.2	0.0930505646311092	464-92-6;76964-07-3	Triterpenoids	4.21419	4.1317	4.1438	4.3018572177099985	4.32322	4.33715	4.15863	4.15658	4.17825
pos_6413	1,2,4-Nonadecanetriol	1，2，4 -十九烷三醇	metab_6286	B(i)	55.4	0	Lipids	脂质	Fatty Acyls	脂肪酰类	C18	Primary metabolite	-	-	HMDB0032112;LMFA05000577	M+Na-H2O	C19H40O3	14.1672	-	-	pos	-	-	-	-	Lipids and lipid-like molecules	Fatty Acyls	321.279	0.0160423599293	49	5.43362308942694	-	Fatty alcohols	4.1721397409800005	4.16298	4.11781	3.12867	3.12905	3.08177	3.1458	3.09739	3.1714130753200003
pos_6421	Ganoderic acid Mj	灵芝酸Mj	metab_6294	B(ii)	0	77.4	Terpenoids	萜类	Triterpenoids	三萜	C18	Secondary metabolite	-	-	HMDB0035354	M+H	C33H52O6	14.1785	-	-	pos	-	-	-	-	Lipids and lipid-like molecules	Prenol lipids	545.384	0.00325051325662	54	0.43786961455951506	110024-15-2	Triterpenoids	4.46527	4.433985005899999	4.40717	4.7515939751800005	4.82555	4.81478	4.51697	4.441233045530001	4.47747
pos_6434	Hexadecanamide	-	metab_6307	B(i)	92.7	0	Lipids	脂质	Fatty Acyls	脂肪酰类	C18	Primary metabolite	-	-	HMDB0012273;LMFA08010009	M+H	C16H33NO	14.2042	-	-	pos	-	-	-	-	Lipids and lipid-like molecules	Fatty Acyls	256.263	0.0028290502023200002	57.9	-0.756679	629-54-9	Fatty amides	5.221	5.201906177840001	5.20373	5.269872090940001	5.28588	5.22992	5.42596	5.44781	5.463478973969999
pos_6436	Coronaric acid	-	metab_6309	B(i)	68.1	0	Lipids	脂质	Fatty Acyls	脂肪酰类	C18	Primary metabolite	map01100;map00591	Metabolic pathways;Linoleic acid metabolism	HMDB0004701	M+H-H2O	C18H32O3	14.2132	代谢途径;亚油酸代谢	C14825	pos	-	-	Metabolism;Metabolism	Global and overview maps;Lipid metabolism	Lipids and lipid-like molecules	Fatty Acyls	279.232	0.00420731952683	52.9	-0.627873	-	Fatty acids and conjugates	3.0768851002900006	3.14958	3.07203	3.13954	3.1104064628400003	3.04815	3.2506902390099994	3.1413	3.19306
pos_6442	Dg(18:4/18:4)	-	metab_6315	B(i)	51	0	Others	其他类	Others	其他类	C18	Others	-	-	HMDB0007338	M+H	C39H60O5	14.2257	-	-	pos	-	-	-	-	Lipids and lipid-like molecules	Fatty Acyls	609.4516419509999	0.0042758679291799995	48.2	0.477442278401971	-	Lineolic acids and derivatives	4.50852	4.42413	4.47664	4.6382	4.6815314185800005	4.667113848630001	4.45964	4.48275	4.4157
pos_6447	Leukotriene e4	-	metab_6320	B(i)	36.1	0	Lipids	脂质	Fatty Acyls	脂肪酰类	C18	Primary metabolite	map00590;map01100	Arachidonic acid metabolism;Metabolic pathways	HMDB0002200;HMDB0247369;LMFA03020075;PW_C001485	M+ACN+Na	C23H37NO5S	14.2492	花生四烯酸代谢;代谢途径	C05952	pos	Lipids	Eicosanoids	Metabolism;Metabolism	Lipid metabolism;Global and overview maps	Lipids and lipid-like molecules	Fatty Acyls	503.256	0.0013570923316900002	42.9	1.66258137095029	75715-89-8	Eicosanoids	4.83398	4.85715	4.96557	4.83566	4.93936	4.81567	5.115195475269999	5.05162	4.974991030219999
pos_6450	6-Pentadecylsalicylic acid	-	metab_6323	B(i)	75.6	0	Phenolic acids and derivatives	酚酸类及其衍生物	Benzoic acids and derivatives	苯甲酸及其衍生物	C18	Secondary metabolite	-	-	HMDB0029683	M+H	C22H36O3	14.2623	-	C10759	pos	-	-	-	-	Benzenoids	Benzene and substituted derivatives	349.273	0.0016909416811600002	54.3	-0.80691	16611-84-0	Benzoic acids and derivatives	4.53179	4.53632	4.58662	4.56942	4.57952	4.6145	4.42695	4.4141808010100005	4.37773
pos_6451	2-Hydroxy-6-pentadecylbenzoic acid	2 -羟基- 6 -十五烷基苯甲酸	metab_6324	B(ii)	0	62.7	Phenolic acids and derivatives	酚酸类及其衍生物	Benzoic acids and derivatives	苯甲酸及其衍生物	C18	Secondary metabolite	-	-	HMDB0029683	M+CH3OH+Na	C22H36O3	14.2623	-	C10759	pos	-	-	-	-	Benzenoids	Benzene and substituted derivatives	403.281	0.00586747656385	51.5	-1.03196	16611-84-0	Benzoic acids and derivatives	2.96406	2.95002	3.12924	3.03002	2.88084	2.95174	2.5931144505000003	2.76459	2.61681
pos_6452	Chichipegenin	-	metab_6325	B(i)	68	0	Terpenoids	萜类	Triterpenoids	三萜	C18	Secondary metabolite	-	-	HMDB0034528	M+H	C30H50O4	14.2623	-	-	pos	-	-	-	-	Lipids and lipid-like molecules	Prenol lipids	475.37805846199996	0.00541208637862	52.8	-0.269939	53227-91-1	Triterpenoids	3.1034641298900003	3.3123195677099995	3.3091016216900004	3.8538	3.90172	3.93459	3.49945	3.60259	3.5663
pos_6454	DG(PGJ2/i-16:0/0:0)	-	metab_6327	B(ii)	0	65.7	Others	其他类	Others	其他类	C18	Others	-	-	HMDB0299205	M+H-H2O	C39H66O7	14.2623	-	-	pos	-	-	-	-	Not Available	Not Available	629.4773649780001	0.0022444830345	52.6	-0.311263	-	Not Available	4.7508	4.7789	4.80483	5.2857	5.32393	5.32551	5.05234	5.0601075060100005	5.021604342780001
pos_6458	Linolenyl alcohol	-	metab_6331	B(i)	96.5	0	Lipids	脂质	Fatty Acyls	脂肪酰类	C18	Primary metabolite	-	-	-	M+H	C18H32O	14.273	-	-	pos	-	-	-	-	-	-	265.25242117700003	0.0026144813579	58.6	-0.646752	-	-	4.87776	4.93934	4.93774	4.959365119009999	4.98901	4.97614	5.13152	5.10775	5.12473
pos_6459	Oleamide	油酸酰胺	metab_6332	B(i)	94.2	0	Lipids	脂质	Fatty Acyls	脂肪酰类	C18	Primary metabolite	-	-	HMDB0002117;LMFA08010004	M+H	C18H35NO	14.273	-	C19670	pos	-	-	-	-	Lipids and lipid-like molecules	Fatty Acyls	282.279	0.0015520701649700001	58.2	-0.687697	301-02-0	Fatty amides	6.38182	6.43642	6.44555	6.45241	6.478965150730001	6.47769	6.630574661900001	6.62443	6.64563
pos_6461	Dodemorph	吗菌灵	metab_6334	B(i)	86.7	0	Others	其他类	Others	其他类	C18	Others	-	-	-	2M+H	C18H35NO	14.273	-	C18786	pos	-	-	-	-	-	-	563.5510630480001	0.0031791080572199995	53.9	0.10154266818776701	1593-77-7	-	5.1144	5.1942	5.20609	5.24799	5.25322	5.27861	5.40772	5.406712744630001	5.44304
pos_6481	11-Hydroxy-9-tridecenoic acid	11 -羟基- 9 -十三碳烯酸	metab_6354	B(ii)	0	48.7	Lipids	脂质	Fatty Acyls	脂肪酰类	C18	Primary metabolite	-	-	HMDB0035881	M+H-2H2O	C13H24O3	14.3602	-	-	pos	-	-	-	-	Lipids and lipid-like molecules	Fatty Acyls	193.15868553099997	0.0049584154235	49	-0.0269871	105798-56-9	Fatty acids and conjugates	3.4545438498000003	3.34854	3.34002	3.44135	3.3910225527099995	3.3658188517900003	3.5593	3.52308	3.5546925517800005
pos_6482	Tridecanedioic acid	-	metab_6355	B(i)	44.2	0	Lipids	脂质	Fatty Acyls	脂肪酰类	C18	Primary metabolite	-	-	HMDB0002327;LMFA01170014	M+H-2H2O	C13H24O4	14.3602	-	-	pos	-	-	-	-	Lipids and lipid-like molecules	Fatty Acyls	209.15350675599998	0.006085898420300001	48.1	-0.40772	505-52-2	Fatty acids and conjugates	3.488	3.33044	3.39202	3.52864	3.45352	3.42875	3.58939	3.5511	3.53585
pos_6483	N-Undecanoylglycine	N -十一酰甘氨酸	metab_6356	B(i)	60.9	0	Amino acids and derivatives	氨基酸及其衍生物	Alpha amino acids and derivatives	Alpha氨基酸及其衍生物	C18	Primary metabolite	-	-	HMDB0013286	M+H-H2O	C13H25NO3	14.3602	-	-	pos	-	-	-	-	Organic acids and derivatives	Carboxylic acids and derivatives	226.17998675099997	0.0018708074804500003	51.5	-0.693567	-	Amino acids, peptides, and analogues	4.09334	4.0294	4.02313	4.1547992367900015	4.1246069194800015	4.07427	4.20921	4.18971	4.18752
pos_6485	Pheophorbide a	脱镁叶绿甲酯酸a	metab_6358	B(i)	90.4	0	Others	其他类	Tetrapyrroles and derivatives	四吡咯及其衍生物	C18	Others	map01110;map00860	Biosynthesis of secondary metabolites;Porphyrin metabolism	HMDB0256449	M+H	C35H36N4O5	14.3602	次级代谢产物的生物合成;卟啉与叶绿素代谢	C18021	pos	-	-	Metabolism;Metabolism	Global and overview maps;Metabolism of cofactors and vitamins	Not Available	Not Available	593.2757502219999	0.0053613647025	57.5	-0.162901	15664-29-6	Not Available	3.75528	3.32087	3.12381	4.72319	4.67746	4.622950250080001	4.96554	4.95312	4.93366
pos_6490	Dg(18:3/18:4)	-	metab_6363	B(i)	59.3	0	Others	其他类	Others	其他类	C18	Others	-	-	HMDB0007280	M+H	C39H62O5	14.392266666700001	-	-	pos	-	-	-	-	Lipids and lipid-like molecules	Fatty Acyls	611.467	0.00347288592106	50.2	0.41043005036137997	-	Lineolic acids and derivatives	5.29355	5.27411	5.34343	5.70977	5.69679	5.68521	5.37605	5.38524	5.379824522740001
pos_6508	15-kete	-	metab_6381	B(ii)	0	51.6	Lipids	脂质	Fatty Acyls	脂肪酰类	C18	Primary metabolite	map00590;map01100	Arachidonic acid metabolism;Metabolic pathways	HMDB0010210	M+CH3OH+H	C20H30O3	14.4497	花生四烯酸代谢;代谢途径	C04577	pos	-	-	Metabolism;Metabolism	Lipid metabolism;Global and overview maps	Lipids and lipid-like molecules	Fatty Acyls	351.253	0.0251458075522	49.4	-0.812973	81416-72-0	Fatty acids and conjugates	3.36539	3.42982	3.4402189390699998	3.66074	3.5733851809199995	3.51876	3.45372	3.47755	3.28545
pos_6518	Dg(17:2/16:4)	-	metab_6390	B(i)	46.2	0	Others	其他类	Others	其他类	C18	Others	-	-	-	M+H	C36H58O5	14.4711	-	-	pos	-	-	-	-	-	-	571.436	0.0035452606293899995	48.5	0.45234326277693304	-	-	3.8529	3.81226	3.87757	4.03835	4.131197512230002	4.02112	3.61316	3.71607	3.67333
pos_6532	Dg(8:0/22:6)	-	metab_6404	B(i)	37.9	0	Others	其他类	Others	其他类	C18	Others	-	-	-	M+H	C33H52O5	14.521166666700001	-	-	pos	-	-	-	-	-	-	529.3889188740001	0.0026978626249400004	47	0.31734088888950895	-	-	4.9938334746300015	4.99933	5.01853	5.55499	5.5412914869000005	5.47923	5.0956	4.96119	5.03285
pos_6533	16-Acetylpriverogenin A	16-乙酰山茶皂苷元A	metab_6405	B(ii)	0	90.1	Terpenoids	萜类	Triterpenoids	三萜	C18	Secondary metabolite	-	-	HMDB0034529	M+CH3OH+H	C32H50O5	14.521166666700001	-	-	pos	-	-	-	-	Lipids and lipid-like molecules	Prenol lipids	547.4	0.00377922189183	57.7	0.45971274084334396	26339-85-5	Triterpenoids	4.51518	4.53041	4.5579	5.10705	5.101328769459999	5.03648	4.7466	4.66724	4.71108
pos_6537	Erucamide	芥酸酰胺	metab_6409	B(i)	93.3	0	Lipids	脂质	Fatty Acyls	脂肪酰类	C18	Primary metabolite	-	-	LMFA08010028	M+H	C22H43NO	14.5426	-	-	pos	-	-	-	-	-	-	338.342	0.00190356846552	57.7	-0.640213	-	-	5.61773	5.61828	5.63213	5.59563	5.554509813559999	5.54176	5.721220667359999	5.72346	5.746079995630001
pos_6539	28-Hydroxy-7-octacosanone	28 -羟基- 7 -二十八烷酮	metab_6411	B(ii)	0	89	Lipids	脂质	Fatty Acyls	脂肪酰类	C18	Primary metabolite	-	-	HMDB0033784	M+Na-H2O	C28H56O2	14.5426	-	-	pos	-	-	-	-	Lipids and lipid-like molecules	Fatty Acyls	429.40506018400004	0.0007402116988130001	55.2	-5.11477	138416-85-0	Fatty alcohols	5.23523	5.24771	5.271389990019999	5.13545	5.0562	5.07145	5.2933	5.32655	5.359498069180001
pos_6547	Barringtogenol C	玉蕊醇C	metab_6419	B(ii)	0	70.3	Terpenoids	萜类	Triterpenoids	三萜	C18	Secondary metabolite	-	-	HMDB0034525	M+CH3OH+Na	C30H50O5	14.5846	-	C08931	pos	-	-	-	-	Lipids and lipid-like molecules	Prenol lipids	545.384	0.0022462486497800004	51.4	5.292399974333151	17304-24-4;13844-01-4	Triterpenoids	4.55864	4.497525154740001	4.56912	4.96605	4.85361	4.916993686600001	4.55738	4.574875275859999	4.5288
pos_6565	20alpha-Dihydroprogesterone	20α-二氢孕酮	metab_6437	B(ii)	0	44.5	Steroids and steroid derivatives	甾体及其衍生物	Pregnane steroids	孕甾烷	C18	Secondary metabolite	map01100	Metabolic pathways	HMDB0003069	M+CH3OH+H	C21H32O2	14.6567	代谢途径	C04042	pos	-	-	Metabolism	Global and overview maps	Lipids and lipid-like molecules	Steroids and steroid derivatives	349.274	0.00464842589741	48.4	-0.459398	145-14-2	Pregnane steroids	4.39002	4.44551	4.42944	4.53733	4.446945261530002	4.4249568337400005	4.22815	4.22823	4.223
pos_6573	Abietinol	枞醇	metab_6445	B(ii)	0	49.1	Terpenoids	萜类	Diterpenoids	二萜	C18	Secondary metabolite	map01100;map00904;map01110	Metabolic pathways;Diterpenoid biosynthesis;Biosynthesis of secondary metabolites	HMDB0034736	M+Na	C20H32O	14.6721	代谢途径;二萜生物合成;次级代谢产物的生物合成	C11882	pos	-	-	Metabolism;Metabolism;Metabolism	Global and overview maps;Metabolism of terpenoids and polyketides;Global and overview maps	Lipids and lipid-like molecules	Prenol lipids	311.237	0.00551241210874	47.8	7.31231420114948	666-84-2	Diterpenoids	1.5647165345700005	1.56907	1.57826	2.07612	1.65942	1.6657595152899998	3.5032	3.49112	3.46259
pos_6594	Allopregnanolone	别孕烯醇酮	metab_6466	B(ii)	0	60.7	Steroids and steroid derivatives	甾体及其衍生物	Pregnane steroids	孕甾烷	C18	Secondary metabolite	-	-	HMDB0001449	M+CH3OH+H	C21H34O2	14.7271	-	C13712	pos	-	-	-	-	Lipids and lipid-like molecules	Steroids and steroid derivatives	351.289	0.0134814649994	51.4	-0.602704	516-54-1	Pregnane steroids	4.45851	4.5778189016300015	4.516994153080001	4.72039	4.60078	4.56129	4.34848	4.30852	4.31937
pos_6600	Zeaxanthin	玉米黄质	metab_6472	B(i)	44.4	0	Terpenoids	萜类	Tetraterpenoids	四萜	C18	Secondary metabolite	map01100;map00906;map01110;map00999	Metabolic pathways;Carotenoid biosynthesis;Biosynthesis of secondary metabolites;Biosynthesis of various plant secondary metabolites	HMDB0002789;LMPR01070261	M+	C40H56O2	14.7535	代谢途径;类胡萝卜素生物合成;次级代谢产物的生物合成;各种植物次生代谢产物的生物合成	C06098	pos	-	-	Metabolism;Metabolism;Metabolism;Metabolism	Global and overview maps;Metabolism of terpenoids and polyketides;Global and overview maps;Biosynthesis of other secondary metabolites	Lipids and lipid-like molecules	Prenol lipids	568.4273112019999	0.00252193249362	47.9	-1.28395	144-68-3	Tetraterpenoids	3.01314	3.00128	2.99535	3.85467	3.65621	3.69022	4.3717402210300005	4.33732	4.36783
pos_6609	Octadecanamide	硬脂酸酰胺	metab_6481	B(i)	82.3	0	Organic acids and derivatives	有机酸及其衍生物	Organic acids and derivatives	有机酸及其衍生物	C18	Secondary metabolite	-	-	HMDB0034146;LMFA08010003	M+H	C18H37NO	14.7844	-	C13846	pos	-	-	-	-	Organic acids and derivatives	Carboximidic acids and derivatives	284.295	0.0018175909080799999	55.7	-0.660245	124-26-5	Carboximidic acids	4.76696	4.6856094629100005	4.804711854030002	4.91588	4.90124	4.92694	4.9772	4.94798	4.95566
pos_6613	(8Z,11Z,14Z)-icosatrien-1-ol	-	metab_6485	B(i)	89.6	0	Lipids	脂质	Fatty Acyls	脂肪酰类	C18	Primary metabolite	-	-	-	M+NH4	C20H36O	14.799	-	-	pos	-	-	-	-	-	-	310.31020369099997	0.00497088984249	57.1	-0.812973	-	-	5.35477	5.3029	5.39312	5.50362	5.50184	5.51061	5.5554584701400005	5.5646409212400005	5.5568
pos_6625	14,15-DiHETrE	-	metab_6497	B(ii)	0	63.3	Lipids	脂质	Fatty Acyls	脂肪酰类	C18	Primary metabolite	map00590;map01100	Arachidonic acid metabolism;Metabolic pathways	HMDB0002265	M+H-H2O	C20H34O4	14.852333333299999	花生四烯酸代谢;代谢途径	C14775	pos	-	-	Metabolism;Metabolism	Lipid metabolism;Global and overview maps	Lipids and lipid-like molecules	Fatty Acyls	321.242	0.0027309859520400002	51.9	-0.440563	77667-09-5	Eicosanoids	2.84822	2.76513	2.77361	2.76709	2.80588	2.6750014280900003	2.54771	2.6269	2.83088
pos_6631	Methyl pheophorbide a	-	metab_6503	B(i)	88.6	0	Others	其他类	Tetrapyrroles and derivatives	四吡咯及其衍生物	C18	Others	-	-	-	M+H	C36H38N4O5	14.8742	-	-	pos	-	-	-	-	-	-	607.2916068540001	0.0040485824083600006	57.4	0.18157568020280498	-	-	4.87508	4.56748	4.40173	5.76483	5.68063	5.59183	5.76238	5.777459064199999	5.77366
pos_6663	Dg(18:2/18:3)	-	metab_6534	B(i)	62.1	0	Others	其他类	Others	其他类	C18	Others	-	-	HMDB0007249	M+H	C39H66O5	14.9954	-	-	pos	-	-	-	-	Lipids and lipid-like molecules	Fatty Acyls	615.498	0.0090448242644	49.2	0.231061501016608	-	Lineolic acids and derivatives	4.85431	4.7313	4.79289	4.98495	5.5187	5.53734	5.27652	5.30451	5.34043
pos_6699	HexCer(18:2_2O/16:1)	-	metab_6570	B(i)	74.1	0	Others	其他类	Others	其他类	C18	Others	-	-	-	M+H	C40H73NO8	15.1584	-	-	pos	-	-	-	-	-	-	696.5412369510001	0.025060523996200002	54.1	0.4920199569064829	-	-	5.2783760203800005	5.43206	5.44317	5.350320557219999	5.47202	5.48915	5.40929	5.36575	5.36228
pos_6710	DL-2-Aminooctanoic acid	DL - 2 -氨基辛酸	metab_6581	B(ii)	0	50.1	Amino acids and derivatives	氨基酸及其衍生物	Alpha amino acids and derivatives	Alpha氨基酸及其衍生物	C18	Primary metabolite	-	-	HMDB0000991	M+H-2H2O	C8H17NO2	15.2091	-	-	pos	-	-	-	-	Organic acids and derivatives	Carboxylic acids and derivatives	124.112	0.00121626128852	49.5	0.724364766233937	644-90-6	Amino acids, peptides, and analogues	4.9277	4.94681	4.96027	4.9767862345300005	4.95671	4.9812	5.03044	5.06189	5.06337
pos_6922	Anofinic acid	-	metab_6793	B(ii)	0	58.5	Others	其他类	Benzopyrans	苯骈吡喃类	C18	Others	-	-	HMDB0033303	M+H	C12H12O3	15.779	-	-	pos	-	-	-	-	Organoheterocyclic compounds	Benzopyrans	205.086	0.00293751019669	51	-0.366716	34818-56-9	1-benzopyrans	4.48495	4.45339	4.46371	4.47743	4.47054	4.47402	4.55817	4.53238	4.58607
pos_6972	Maltol	麦芽酚	metab_6843	B(i)	55.3	0	Others	其他类	Others	其他类	C18	Others	map00523;map01110	Polyketide sugar unit biosynthesis;Biosynthesis of secondary metabolites	HMDB0030776	M+H	C6H6O3	15.9826	聚酮糖单元生物合成;次级代谢产物的生物合成	C11918	pos	-	-	Metabolism;Metabolism	Metabolism of terpenoids and polyketides;Global and overview maps	Organoheterocyclic compounds	Pyrans	127.039	0.0087834480064	50.3	0.7256164954405451	118-71-8	Pyranones and derivatives	4.790755175859999	4.70366	4.70984	4.72346	4.67432	4.70799	4.70578	4.66174	4.62177
pos_7079	4-hydroxyproline	-	metab_6950	B(i)	39.5	0	Amino acids and derivatives	氨基酸及其衍生物	Proline and derivatives	脯氨酸及其衍生物	C18	Primary metabolite	map01100;map00470;map00330;map02010	Metabolic pathways;D-Amino acid metabolism;Arginine and proline metabolism;ABC transporters	HMDB0000725;PW_C002643	M+H-2H2O	C5H9NO3	15.6028	代谢途径;D-氨基酸代谢;精氨酸和脯氨酸代谢;ABC转运器	C01157	pos	Peptides	Amino acids	Metabolism;Metabolism;Metabolism;Environmental Information Processing	Global and overview maps;Metabolism of other amino acids;Amino acid metabolism;Membrane transport	Organic acids and derivatives	Carboxylic acids and derivatives	96.0449	0.0150122762258	46.4	3.55953422364722	51-35-4	Amino acids, peptides, and analogues	3.25543	3.1955243660900003	3.29774	3.01973	3.06282	2.98126	2.97761	3.0360450957200005	2.99689
pos_7195	Subamolide C	-	metab_7065	B(i)	78.7	0	Others	其他类	Others	其他类	C18	Others	-	-	-	M+H	C21H36O3	15.446	-	-	pos	-	-	-	-	-	-	337.273	0.0073789931220100006	54.9	-0.797561	-	-	3.77702	3.69875	3.75628	4.03049	4.03706	4.06047	4.04338	4.10393	4.12225
pos_7275	Sl(12:1_o/16:0)	-	metab_7145	B(i)	52.4	0	Others	其他类	Others	其他类	C18	Others	-	-	-	M+H	C28H55NO5S	15.2091	-	-	pos	-	-	-	-	-	-	518.3841620869999	0.0130021274357	47.8	-6.20281	-	-	1.1371917638299998	0.902694	0.300694	3.2824	3.2130726924799995	3.20312	2.17384	1.4679064468599998	1.85164
pos_7282	Bis(2-ethylhexyl) phthalate	-	metab_7152	B(i)	92.5	0	Phenolic acids and derivatives	酚酸类及其衍生物	Benzoic acids and derivatives	苯甲酸及其衍生物	C18	Secondary metabolite	-	-	HMDB0249243	M+H	C24H38O4	15.187116666700001	-	C03690	pos	-	-	-	-	Benzenoids	Benzene and substituted derivatives	391.284	0.00484443425828	57.5	-0.53225	-	Benzoic acids and derivatives	4.567878203769999	4.5923	4.63015	4.66535	4.643501837580001	4.731386528540001	4.740450958209999	4.7703	4.75521
pos_7286	Soyacerebroside I	大豆脑苷脂I	metab_7156	B(i)	94	0	Lipids	脂质	Sphingolipids	鞘脂类	C18	Primary metabolite	-	-	HMDB0032677	M+H	C40H75NO9	15.1584	-	-	pos	-	-	-	-	Lipids and lipid-like molecules	Sphingolipids	714.552	0.0414428515672	58.3	0.318888448352755	114297-20-0	Glycosphingolipids	5.22067	5.37306	5.39849	5.278536121549999	5.41612	5.43353	5.3665565490699985	5.31226	5.31213
pos_7390	3beta-Acetoxy-8beta,15-dihydroxy-ent-labda-13E-ene	-	metab_7259	B(i)	93.3	0	Terpenoids	萜类	Diterpenoids	二萜	C18	Secondary metabolite	-	-	-	M+H	C22H38O4	14.7271	-	-	pos	-	-	-	-	-	-	367.284	0.00664740327532	57.8	-0.446695	-	-	4.85773	4.97848	4.94996	5.05382	4.967795130390001	4.98765	4.73396	4.6986934809699985	4.6978
pos_7416	Diacylglycerol(16:1/18:2)	-	metab_7285	B(i)	75.2	0	Lipids	脂质	Fatty Acyls	脂肪酰类	C18	Primary metabolite	-	-	HMDB0007132	M+H	C37H66O5	14.665683333299999	-	C00165	pos	-	-	-	-	Lipids and lipid-like molecules	Fatty Acyls	591.4987712330001	0.0261929	54.1	0.795247950175755	-	Lineolic acids and derivatives	4.04469	4.2829177336300015	4.27916	4.273889659080002	4.39466	4.4696969093300005	4.4212122427699985	4.334624980309998	4.33803
pos_7438	1.3-dilinolenin	-	metab_7307	B(i)	83	0	Lipids	脂质	Fatty Acyls	脂肪酰类	C18	Primary metabolite	-	-	HMDB0056366	M+H	C39H64O5	14.5846	-	-	pos	-	-	-	-	Lipids and lipid-like molecules	Fatty Acyls	613.482	0.0033006474238200002	56.1	-0.359725	-	Lineolic acids and derivatives	5.432886074380001	5.38189	5.420435834939999	6.1426977259500015	6.1105422001199985	6.14194	5.6931233588199985	5.73491	5.736792110240001
pos_7441	6-Acetylandalusol	-	metab_7310	B(i)	81.4	0	Terpenoids	萜类	Diterpenoids	二萜	C18	Secondary metabolite	-	-	-	M+H	C22H36O4	14.5732	-	-	pos	-	-	-	-	-	-	365.268	0.00122265733396	55.2	-0.394073	-	-	3.14072	3.1370448899000003	3.13734	3.4391305504300003	3.34891	3.38817	3.11851	3.20406	3.31272
pos_7449	N-Stearoyl Valine	N -硬脂酰缬氨酸	metab_7318	B(ii)	0	54.8	Others	其他类	Others	其他类	C18	Others	-	-	HMDB0241952	M+H	C23H45NO3	14.5426	-	-	pos	-	-	-	-	Organic acids and derivatives	Carboxylic acids and derivatives	384.34701366300004	0.00138564867535	50	-0.540189	-	Amino acids, peptides, and analogues	5.32783	5.3329	5.35663	5.26684	5.2139	5.2127	5.4081	5.4362	5.461496253659999
pos_7466	DG(6 keto-PGF1alpha/0:0/i-16:0)	-	metab_7335	B(ii)	0	73.7	Others	其他类	Others	其他类	C18	Others	-	-	HMDB0299199	M+H-2H2O	C39H70O9	14.477466666700002	-	-	pos	-	-	-	-	Not Available	Not Available	647.486	0.0134729861477	53	-3.11725	-	Not Available	4.67215	4.80484	4.88273	4.79011	4.95114	5.15369	5.15597	5.2386896836400005	4.91702
pos_7501	4alpha-Carboxy-5alpha-cholesta-8-en-3beta-ol	4alpha-羧基-5alpha-胆甾-8-烯-3beta-醇	metab_7370	B(ii)	0	44.9	Others	其他类	Others	其他类	C18	Others	-	-	HMDB0012166	M+H	C28H46O3	14.392266666700001	-	-	pos	-	-	-	-	Lipids and lipid-like molecules	Steroids and steroid derivatives	431.352	0.0179599455818	48.1	-0.0853354	-	Cholestane steroids	3.74392	4.4042206240300015	3.764798447980001	3.88218	4.46996	4.0549711667800015	4.69329	4.71521	4.23367
pos_7502	Deoxycholic acid	脱氧胆酸	metab_7371	B(ii)	0	87.9	Steroids and steroid derivatives	甾体及其衍生物	Other steroids and steroid derivatives	其他类甾体及其衍生物	C18	Secondary metabolite	-	-	HMDB0000626	M+CH3OH+H	C24H40O4	14.392266666700001	-	C04483	pos	Steroids	24-Carbon atoms	-	-	Lipids and lipid-like molecules	Steroids and steroid derivatives	425.32605726400004	0.0110983274917	56.8	-0.238794	83-44-3	Bile acids, alcohols and derivatives	5.20455	5.16827	5.2699	4.73099	4.73335	4.66104	4.55678	4.56812	4.42539
pos_7508	3E,5E-tridecadienoic acid	-	metab_7377	B(i)	76.4	0	Lipids	脂质	Fatty Acyls	脂肪酰类	C18	Primary metabolite	-	-	LMFA01030244	M+NH4	C13H22O2	14.3602	-	-	pos	-	-	-	-	-	-	228.19568702900003	0.00225784916921	54.5	-0.563592	-	-	4.56973	4.51726	4.5371944625300005	4.5659	4.57799	4.49904	4.65679	4.67363	4.66392
pos_7531	DG(6 keto-PGF1alpha/14:0/0:0)	-	metab_7400	B(ii)	0	66.3	Others	其他类	Others	其他类	C18	Others	-	-	HMDB0295086	M+ACN+H	C37H66O9	14.273	-	-	pos	-	-	-	-	Not Available	Not Available	696.505	0.0017594956024000001	50.9	-0.011119	-	Not Available	5.28291	5.31277	5.359759127749999	5.37535	5.37124	5.37659	5.27592	5.2630557199400005	5.22387
pos_7532	Epoxypheophorbide a	-	metab_7401	B(i)	87.1	0	Others	其他类	Tetrapyrroles and derivatives	四吡咯及其衍生物	C18	Others	-	-	-	M+H	C35H36N4O6	14.273	-	C21192	pos	-	-	-	-	-	-	609.271	0.00797440482378	56.7	-0.398758	-	-	2.06063	2.06507	2.07443	2.16882	2.15696	2.16339	2.16187	2.16571	2.15918
pos_7533	Soyasapogenol A	大豆甾醇A	metab_7402	B(ii)	0	47.3	Terpenoids	萜类	Triterpenoids	三萜	C18	Secondary metabolite	-	-	HMDB0034505	M+CH3OH+Na	C30H50O4	14.273	-	C17419	pos	-	-	-	-	Lipids and lipid-like molecules	Prenol lipids	529.389	0.00302206734764	47.3	5.24047154146786	508-01-0	Triterpenoids	4.80701	4.84446	4.892915652569999	5.266892728269999	5.30799	5.30489	4.93999	4.94991	4.88919
pos_7536	Estrane	雌烷	metab_7405	B(i)	79.8	0	Steroids and steroid derivatives	甾体及其衍生物	Estrane steroids	雌甾烷	C18	Secondary metabolite	-	-	HMDB0251974	M+H	C18H30	14.273	-	C19641	pos	-	-	-	-	Lipids and lipid-like molecules	Steroids and steroid derivatives	247.242	0.00182586335018	55.1	-0.852491	-	Estrane steroids	4.14243	4.2491	4.25595	4.2705	4.26742	4.3116816888699985	4.451814082559999	4.41849	4.44173
pos_7542	Dg(o-24:5/2:0)	-	metab_7411	B(i)	47.9	0	Others	其他类	Others	其他类	C18	Others	-	-	-	M+H	C29H48O4	14.2623	-	-	pos	-	-	-	-	-	-	461.362	0.00900794131575	48.4	-0.503831	-	-	3.53387	3.09831	3.11213	3.76331	3.33043	3.34099	3.5346921386300005	3.7608	3.66137
pos_7548	Methyl pheophorbide b	-	metab_7417	B(i)	88.5	0	Others	其他类	Tetrapyrroles and derivatives	四吡咯及其衍生物	C18	Others	-	-	-	M+H	C36H36N4O6	14.236633333299999	-	-	pos	-	-	-	-	-	-	621.2706738219999	0.00238356713066	57.4	-0.141071	-	-	4.1825558434699985	3.83683	3.56632	4.81655	4.69702	4.59623	4.75846	4.793259717230001	4.67477
pos_7549	Docosapentaenoic acid	-	metab_7418	B(i)	35.2	0	Lipids	脂质	Fatty Acyls	脂肪酰类	C18	Primary metabolite	map01040	Biosynthesis of unsaturated fatty acids	HMDB0006528;LMFA04000049	M+CH3OH+H	C22H34O2	14.236633333299999	不饱和脂肪酸的生物合成	C16513	pos	-	-	Metabolism	Lipid metabolism	Lipids and lipid-like molecules	Fatty Acyls	363.289	0.0035572483254600004	46.1	-1.16475	24880-45-3	Fatty acids and conjugates	4.43876	4.3264084502800015	4.38422	4.5048	4.44041	4.38046	4.08715	4.10674	4.0537
pos_7578	12-Oxo-2,3-dinor-10,15-phytodienoic acid	12 -氧代- 2，3 -二酮- 10，15 -植二烯酸	metab_7447	B(ii)	0	68.1	Lipids	脂质	Fatty Acyls	脂肪酰类	C18	Primary metabolite	-	-	HMDB0032090	2M+H	C16H24O3	14.1672	-	-	pos	-	-	-	-	Lipids and lipid-like molecules	Fatty Acyls	529.353	0.00441587175062	50.1	0.924635522343014	197247-23-7	Eicosanoids	3.21615	3.28593	3.14605	4.57046	4.545307167880001	4.57316	3.98144	3.93834	4.00985
pos_7602	2-(14,15-Epoxyeicosatrienoyl) Glycerol	2-（14,15-环氧二十碳三烯酰基）甘油	metab_7471	B(ii)	0	54.6	Lipids	脂质	Glycerolipids	甘油脂类	C18	Primary metabolite	-	-	HMDB0013651	M+H	C23H38O5	14.1212	-	-	pos	-	-	-	-	Lipids and lipid-like molecules	Glycerolipids	395.279	0.00204185701648	50	-0.243653	848667-56-1	Monoradylglycerols	3.92984	3.84594	3.89166	3.66709	3.73728	3.74767	3.63229	3.6021651465900004	3.70858
pos_7618	Cis-7-hexadecenoic acid	-	metab_7487	B(i)	49.2	0	Lipids	脂质	Fatty Acyls	脂肪酰类	C18	Primary metabolite	-	-	-	M+H-H2O	C16H30O2	14.087216666700002	-	-	pos	-	-	-	-	-	-	237.22113525900002	0.0026831610712199994	48.9	-0.616354	-	-	4.35583	4.35563	4.31299	4.42885	4.43024	4.42228	4.56887	4.58316	4.58981
pos_7625	13-Apo-beta-carotenone	-	metab_7494	B(i)	95	0	Terpenoids	萜类	Sesquiterpenoids	倍半萜	C18	Secondary metabolite	-	-	-	M+H	C18H26O	14.0711	-	C20696	pos	-	-	-	-	-	-	259.206	0.00219738994762	58.3	-0.535798	-	-	2.96251	2.99196	2.96639	3.09818	3.04564	3.1399527179900004	4.04908	4.01092	4.03646
pos_7634	Sl(12:0_o/16:1)	-	metab_7503	B(i)	53.1	0	Others	其他类	Others	其他类	C18	Others	-	-	-	M+H	C28H55NO5S	14.0586	-	-	pos	-	-	-	-	-	-	518.384	0.00683222097774	47.2	-6.25291	-	-	4.12643	3.89686	3.78911	4.48346	4.283773340350002	4.25982	4.33217	4.1499239901800005	4.14907
pos_7646	19-(3-methyl-butanoyloxy)-villanovane-13alpha,17-diol	-	metab_7515	B(i)	96	0	Terpenoids	萜类	Diterpenoids	二萜	C18	Secondary metabolite	-	-	LMPR0104150003	M+H	C25H42O5	14.0473	-	-	pos	-	-	-	-	-	-	423.31	0.00268786876613	58.4	-0.250937	-	-	4.05706	4.01501	3.998042212380001	4.01063	3.93273	3.95001	3.7844609940800007	3.7345020290300006	3.76766
pos_7653	Ganoderiol G	灵芝嘌呤G	metab_7522	B(ii)	0	61.7	Terpenoids	萜类	Triterpenoids	三萜	C18	Secondary metabolite	-	-	HMDB0037780	M+CH3OH+H	C31H52O5	14.015016666700001	-	-	pos	-	-	-	-	Lipids and lipid-like molecules	Prenol lipids	537.415	0.00608535020409	51.6	0.278801859840854	114567-48-5	Triterpenoids	4.5988	4.44663	4.40412	4.716328284459999	4.2421442780300005	4.24841	4.88937	4.69443	4.6334
pos_7656	Cerevisterol	-	metab_7525	B(i)	58.5	0	Steroids and steroid derivatives	甾体及其衍生物	Ergostane steroids	麦角甾烷	C18	Secondary metabolite	-	-	-	M+H	C28H46O3	14.015016666700001	-	-	pos	-	-	-	-	-	-	431.352	0.0287394659675	50.7	-0.142775	-	-	2.75175	2.81893	2.68467	3.21885	2.92383	3.10238	3.50473	3.59998	3.43802
pos_7657	Salvic acid acetate	-	metab_7526	B(i)	92.5	0	Terpenoids	萜类	Diterpenoids	二萜	C18	Secondary metabolite	-	-	-	M+H	C22H36O4	14.015016666700001	-	-	pos	-	-	-	-	-	-	365.268	0.00414573145479	57.5	-0.612968	-	-	3.43972	3.3662034750400003	3.3489393512800003	3.5560639972800003	3.46444	3.3841368929900004	3.3396	3.4009181399799995	3.37125
pos_7659	MG(PGF1alpha/0:0/0:0)	-	metab_7528	B(ii)	0	72.1	Others	其他类	Others	其他类	C18	Others	-	-	HMDB0260511	M+H-2H2O	C23H42O7	14.004266666700001	-	-	pos	-	-	-	-	Not Available	Not Available	395.279	0.00298679382025	53	-0.403282	-	Not Available	3.8827	3.91883	3.80774	3.42558	3.2981051328099995	3.32842	3.22123	3.30938	3.2129531951700003
pos_7670	NAGlySer(14:1/10:0)	-	metab_7538	B(i)	39.5	0	Others	其他类	Others	其他类	C18	Others	-	-	-	M+H	C29H52N2O7	13.9918	-	-	pos	-	-	-	-	-	-	541.389	0.00287675492441	45.4	7.53693217109591	-	-	4.71464	4.6733108740699985	4.73185	4.80863	4.75993	4.76405	4.80845	4.71934	4.7261718334400005
pos_7682	Dg(18:2/18:5)	-	metab_7550	B(i)	55.3	0	Others	其他类	Others	其他类	C18	Others	-	-	-	M+H	C39H62O5	13.9688	-	-	pos	-	-	-	-	-	-	611.467	0.00629564406814	50.8	0.496998733905047	-	-	4.24556	4.27002	4.25943	4.9213	4.97777	4.94257	4.64592	4.66252	4.65376
pos_7683	Cucurbitachrome 1	葫芦素1	metab_7551	B(ii)	0	60	Terpenoids	萜类	Tetraterpenoids	四萜	C18	Secondary metabolite	-	-	HMDB0041581	M+	C40H56O4	13.9688	-	-	pos	-	-	-	-	Lipids and lipid-like molecules	Prenol lipids	600.416	0.00504532308806	50.4	-3.08643	181229-73-2	Tetraterpenoids	3.97594	3.99523	3.98805	4.30794	4.27615	4.26748	4.52209	4.4648247880800005	4.46537
pos_7694	Diisopropyl phthalate	邻苯二甲酸二异丙酯	metab_7562	B(i)	95.6	0	Phenolic acids and derivatives	酚酸类及其衍生物	Benzoic acids and derivatives	苯甲酸及其衍生物	C18	Secondary metabolite	-	-	-	M+H-H2O	C14H18O4	13.9688	-	C14468	pos	-	-	-	-	-	-	233.117	0.0125644942014	58.4	-0.608887	605-45-8	-	2.35166	2.0617056970200003	2.27163	1.635	1.85822	1.93935	2.19825	1.75584	1.7956283576700005
[truncated: 1,818 more rows]
